# Supplementary material for: Farming and the geography of nutrient production for human use: a transdisciplinary analysis
Source: PubMed Central journal article supplement (PMC5483486; doi:10.1016/s2542-5196(17)30007-4), 2017-04
Supplement: mmc1.pdf [file mmc1.pdf]

# THE LANCET Planetary Health

## Supplementary appendix

This appendix formed part of the original submission and has been peer reviewed. We post it as supplied by the authors.

Supplement to: Herrero M, Thornton PK, Power B, et al. Farming and the geography of nutrient production for human use: a transdisciplinary analysis. *Lancet Planetary Health* 2017; **1**: e33–42.

# **Farming and the geography of nutrient production for human use: a transdisciplinary analysis**

## **Supplementary material**

Mario Herrero<sup>1\*</sup>, Philip K Thornton<sup>1,2</sup>, Brendan Power<sup>1</sup>, Jessica Bogard<sup>1,3</sup>, Roseline Remans<sup>4,5</sup>, Steffen Fritz<sup>6</sup>, James N Gerber<sup>7</sup>, Gerald Nelson<sup>8</sup>, Linda See<sup>6</sup>, Katharina Waha<sup>1</sup>, Reg A. Watson<sup>9</sup>, Paul C West<sup>7</sup>, Leah H Samberg<sup>7</sup>, Jeannette van de Steeg<sup>10</sup>, Eloise Stephenson<sup>1,11</sup>, Mark van Wijk<sup>12</sup>, and Petr Havlík<sup>6</sup>.

<sup>1</sup>Commonwealth Scientific and Industrial Research Organisation (CSIRO), 306 Carmody Road, St Lucia, QLD 4067, Australia.

<sup>2</sup>CGIAR Research Programme on Climate Change, Agriculture and Food Security (CCAFS), ILRI, Nairobi, Kenya.

<sup>3</sup>School of Public Health, University of Queensland, Herston Road, Herston, QLD 4006, Australia.

<sup>4</sup>Biodiversity International, W. De Croylaan 42, 3001 Heverlee, Belgium.

<sup>5</sup>Faculty of Bioscience Engineering, Ghent University, Coupure Links 653, B-9000, Ghent, Belgium.

<sup>6</sup>International Institute for Applied Systems Analysis, Laxenburg, Austria.

<sup>7</sup>Institute on the Environment, University of Minnesota, 1954 Buford Avenue LES 325, Saint Paul, Minnesota 55108, US.

<sup>8</sup>University of Illinois, Champaign, Urbana, USA.

<sup>9</sup>Institute for Marine and Antarctic Studies, University of Tasmania, 15-21 Nubeena Crescent, Taroona, Tasmania 7053, Australia.

<sup>10</sup>HAS University of Applied Sciences, International Food and Agr-business, Onderwijsboulevard 221, 5223 DE 's-Hertogenbosch, The Netherlands.

<sup>11</sup>Griffith School of Environment, Griffith University, Nathan, Brisbane, QLD, 4111, Australia.

<sup>12</sup>International Livestock Research Institute, PO Box 30709, Nairobi, Kenya.

\*Correspondence: Dr Mario Herrero, Commonwealth Scientific and Industrial Research Organisation (CSIRO), 306 Carmody Road, St Lucia, QLD 4067, Australia [Mario.Herrero@csiro.au](mailto:Mario.Herrero@csiro.au); +61 7 3214 2538.

## 1. Detailed Methods

**Global field size dataset:** The field size data were collected through a crowdsourcing campaign using Geo-Wiki (<http://www.geo-wiki.org>), which is an application that involves the crowd in visual interpretation of very high resolution satellite imagery. During one campaign that was focused on human impact (See et al., 2015), volunteers were asked to interpret field sizes located in cropland areas in a 1 km<sup>2</sup> sample area using the following 4 categories: 1 (very small); 2 (small); 3 (medium) and 4 (large). The data gathered from this campaign consisted of 53,000 samples of 1 km<sup>2</sup> areas, of which around 36,000 were at unique locations. Of these unique locations, 13,963 samples contained cropland and therefore the size of the field. This sample data set of ordinal values was then interpolated using inverse weighted distance, treating the ordinal values as a continuum, to create a global map of field size at a 1 km<sup>2</sup> resolution, which was then clipped using the IIASA/IFPRI cropland map (Fritz et al., 2015). The global field size map can be downloaded from <http://www.geo-wiki.org>.

The field sizes have been roughly correlated to areas as follows: a field size of very small corresponds to fields that are smaller than 0.5 ha; small fields correspond to an area of 0.5 to 2 ha; medium fields to between 2 and 100 ha; and large fields are all fields larger than 100 ha. These field sizes were derived by measuring the size of fields found inside the 1 km<sup>2</sup> areas and by adjusting, in particular, the large field size based on comparisons of large fields in representative areas and using expert judgment from members of the GEOGLAM initiative (<http://www.earthobservations.org/geoglam.php>).

The field size map was validated in two ways. The first type of validation was to assess the reliability of the crowd. A random sample of the field size data collected during the campaign was provided to multiple experts and then correlated with the data obtained from the crowd. This resulted in a Spearman's rank correlation coefficient of 0.80, indicating an acceptable agreement. The second form of validation was to consider the effect of interpolation by randomly choosing a new set of samples from the interpolated map, comparing these to the field sizes determined by multiple experts from visual interpretation of very high resolution imagery. In total, 181 validation points with field sizes ranging from very small (1) to large (4) were used. The results indicate a Spearman's rank correlation coefficient of 0.78. Given that the global map was developed using only 13,963 points, this agreement is considered to be satisfactory. More details of the validation process can be found in Fritz et al. (2015).

**Farm size distributions:** Currently there are no farm-size distribution data for the globe. Lowder et al. (2014, 2016) compiled much information on the topic, drawing from census data. Two issues associated with these data are that the country coverage is incomplete, and that the information is based on many different years of census data (and some of the data are from the 1960s). The approach taken here was to calculate regional average farm size distributions for the regions of interest, update the number of farms to more recent values, where possible, and then use these regional distributions on a country-by-country basis to derive farm sizes on a national basis, on the assumption that the structure of agriculture in different countries of a region exhibits some essential similarities. In this way, a farm-size distribution can be estimated for any country, provided that data exist for the total number of farms in the country. The more recent the information on number of farms in the country, the better, given that farm size distribution in many countries may be changing over time for a variety of reasons. Out of the 163 countries in our analysis, data on number of farms for 138 countries were available in Lowder et al. (2014), and estimates for the remaining 25 were found from online sources, either from census data or, as a last resort, estimated from rural population and household size data. For the 167 countries that Lowder et al. (2014) found data for, the total number of farms was 569.6 million; this included several small island states excluded from our analysis. For our study's 163 countries, we calculated a total of 577.2 million farms. The countries in this analysis and their regional allocation are shown in Table S2.

To allocate national production statistics to the different farm sizes at a country level, we used the spatially explicit global dataset on field-size distribution described earlier (Fritz et al., 2015). This dataset is based on a 1-km resolution cropland percentage map for the baseline year 2005 overlaid with field size data collected via a crowdsourcing campaign. For each country, we calculated the relative proportion of four different field sizes, "very small" (<0.5 ha), "small" (0.5-2 ha), "medium" (2-100 ha) and "large" (> 100 ha). We then imputed a plausible field size distribution to the country's farm size distribution (using either national or regional data), using three simple rules, so that the national (non-spatial) farm size areas matched the national (spatial) field size areas:

- The distributions should be monotonically increasing, monotonically decreasing, or unimodal; i.e., smooth distributions rather than simply random selections.
- Any allocation reflects the assumption that the proportion of field sizes from 0.5-2 ha decreases as farm size increases.
- Any allocation reflects the assumption that the proportion of field sizes great than 100 ha increases as farm size increases from 100 ha upwards.

From the tables relating field sizes to farm sizes for different countries and regions, we then developed matrices of relative proportions which were used to allocate all the fields of a certain size to farms of different size. Spatially explicit national agricultural production data were then filtered through this field-size / farm-size matrix, resulting in production data being allocated to different farm sizes. We did this allocation on the basis of production rather than area, given that there are substantial differences between different agricultural production data sets in relation to actual areas cropped. To take some account of the differences in agro-ecological suitability within a country, we utilised a length of growing period dataset (Jones and Thornton 2009, 2013) to define the following five categories: LGP<60 days, 60-120 days, 120-180 days, 180-240 days, and >240 days per year. For each commodity, we calculated relative production per pixel. Each country's total production of a crop was then allocated by plot size, by farm size and by LGP zone, in relation to the ratio of relative production to relative area. This final step was done to take some account of areas with more or less suitability for the production of each commodity, as reflected in the production data; this results in a weighting of field sizes according to their relative production as spread across the country's farm sizes. This is an important element, because the methods we used do not allow us to say where farms of particular size are actually located; and a small farm in a low rainfall regime will not be as productive as a small farm in a higher rainfall regime, all other things being equal. Our estimates of farm-size distributions in countries where such data do not exist are plausible, but they would benefit from triangulation from other sources. A fully spatially-explicit farm size distribution dataset for the globe is yet to be developed.

An example of the calculation procedure is shown in Table 1. Relative production by plot size and by LGP zone is shown in Table 1A; this shows the proportion of national production of a crop broken down by plot size and by LGP zone. In this example, there are no pixels in LGP zones 4 or 5 and no pixels with a plot size > 100 ha. The proportion of national crop area is calculated on the same basis (results not shown in Table 1). Table 1B shows the allocation of plot sizes to farm sizes. Rows sum to unity, and the grey cells must be zero by definition. In the example, very small plot sizes are allocated to farm sizes as shown; thus 80 percent of the very small plots (<0.5 ha) are allocated to farm sizes < 1 ha, as are 20 percent of the small plots (0.5-2 ha). The distributions by plot size (down the column) follow the three rules given above. The allocation was done by trial-and-error so that the relative total area of each plot size category, as calculated across all farm sizes, matches the relative area of each plot size category calculated from the dataset of Fritz et al. (2015) for the country under consideration (data not shown in Table 1). The third step in the procedure is shown in Table 1C, where the relative production RP of the crop in plot size *i* and farm size *j* is calculated as:

$$RP_{ij} = \left( \sum_{k=1}^5 \text{PROD}_{i,k} / \text{AREA}_{i,k} \right) * \text{FA}_{i,k}$$

where *k* is the LGP zone, PROD is the proportion of national production (Table 1A), AREA is the proportion of national area, and FA is the imputed plot size proportion (Table 1B). These values of RP are then summed for each farm size and normalised to match total national production of the crop (columns 6 and 7 in Table 1C).

Table 1.

A. Relative production by plot size (Fritz et al., 2015) and LGP zone (Jones and Thornton, 2013).

| <b>Relative Production</b> | <b>LGP 1<br/>(&lt;60<br/>days)</b> | <b>LGP 2<br/>(60-<br/>120)</b> | <b>LGP 3<br/>(120-<br/>180)</b> | <b>LGP 4<br/>(180-240)</b> |
|----------------------------|------------------------------------|--------------------------------|---------------------------------|----------------------------|
| Plot size 1 (<0.5 ha)      | 0.210                              | 0.050                          | 0.000                           | 0.000                      |
| Plot size 2 (0.5-2 ha)     | 0.080                              | 0.230                          | 0.280                           | 0.000                      |
| Plot size 3 (2-100 ha)     | 0.000                              | 0.150                          | 0.000                           | 0.000                      |
| Plot size 4 (>100 ha)      | 0.000                              | 0.000                          | 0.000                           | 0.000                      |

B. Imputed allocation of plot sizes to farm sizes (see text). Grey cells must be zero by definition.

| Plot size by farm size matrix | Plot size 1 (<0.5 ha) | Plot size 2 (0.5-2 ha) | Plot size 3 (2-100 ha) | Plot size 4 (>100 ha) |
|-------------------------------|-----------------------|------------------------|------------------------|-----------------------|
| Farm size < 1 ha              | 0.80                  | 0.20                   | 0.00                   | 0.00                  |
| Farm size 1-2 ha              | 0.55                  | 0.45                   | 0.00                   | 0.00                  |
| Farm size 2-5 ha              | 0.20                  | 0.50                   | 0.30                   | 0.00                  |

C. Relative production (from A above) allocated to the plot size by farm size matrix (B above).

| Plot size by farm size matrix | Plot size 1 (<0.5 ha) | Plot size 2 (0.5-2 ha) | Plot size 3 (2-100 ha) | Plot size 4 (>100 ha) | Production by farm size (sum) | Normalised production by farm size |
|-------------------------------|-----------------------|------------------------|------------------------|-----------------------|-------------------------------|------------------------------------|
| Farm size < 1 ha              | 0.883                 | 0.804                  | 0.000                  | 0.000                 | 1.687                         | 0.245                              |
| Farm size 1-2 ha              | 0.607                 | 1.809                  | 0.000                  | 0.000                 | 2.416                         | 0.351                              |
| Farm size 2-5 ha              | 0.221                 | 2.010                  | 0.540                  | 0.000                 | 2.771                         | 0.403                              |
| <b>Total</b>                  |                       |                        |                        |                       | <b>6.874</b>                  | <b>1.000</b>                       |

**Crop production data:** The majority of the EarthStat crop production data used here was developed for year 2000 (Monfreda et al, 2008), with updates for major crops (wheat, rice, maize, soy) to year 2005 (Ray et al, 2012). The yield and harvested area data for the year 2000 were derived as an average of crop census data from 1997-2003. A range of years was used because census data are not reported every year. In addition, the average reduces anomalies from short-term weather and market shocks. Census data were used from 206 countries, 150 of which had sub-national data at the state/province level, 73 of those 150 countries had data at the county/district level.

Monfreda et al. 2008 then combined these crop census data with a cropland area data layer (Ramankutty et al. 2008) to distribute yields and harvested area data within political units. The Ramankutty et al. 2008 cropland area was developed by combining agricultural census data with two satellite-derived land cover products (Friedl et al. 2002, Bartholome et al. 2005). Monfreda et al. 2008 distributed crop-specific harvested area data within political units proportional to total cropland area; yield data were distributed uniformly within political units.

More detailed methods for developing the crop production data are in Monfreda et al. 2008; additional details for the cropland area data are in Ramankutty et al. 2008. Details on the updates to the yield and harvested area data for wheat, rice, maize are available in the supplementary materials of Ray et al. (2012). The data are available at: [www.EarthStat.org](http://www.EarthStat.org)

**Global livestock production:** We updated the global livestock productivity dataset of Herrero et al. (2013) for 2000 to the base year 2005. We made all the calibrations by country rather than by region, hence adding significant additional detail to our estimates. Detailed information of the methods employed for constructing these datasets is presented in Herrero et al (2013). What follows is a summary of the methods.

A livestock systems classification based on an earlier effort by Sere and Steinfeld (1996) and recently updated by Robinson et al (2011) was used as the starting point. We differentiated 8 different types of livestock systems in 28 geographical regions of the world for this study. These are three types of each grazing and mixed systems, differentiated by agroecology: arid, humid and temperate/highland, and peri-urban and other systems. Details can be found in Robinson et al. (2011).

Numbers of animals for each of these systems and regions were estimated using the data of Robinson et al (2014) for the year 2005. For ruminants (cattle, sheep and goats), we disaggregated the dairy and beef cattle herds using livestock demographic data for total cattle, sheep and goats and the dairy females for each species, respectively, from FAOSTAT. We used herd dynamics models parameterised

for each region and production system using reproduction and mortality rates obtained from extensive literature reviews to estimate herd composition. We then subtracted the number of total dairy animals from the total number for each species. This procedure enabled us to have distinct herds for the production of milk and beef.

For monogastrics (pigs and poultry), we only differentiated two systems: smallholder and industrial production systems, since these are the most important ones and industrial systems exhibit most of the growth in meat production globally (Bruinsma 2003) The allocation of poultry, eggs and pork production was done on the basis of knowledge of the total product output from these two systems from national information from selected countries in the different regions, applied to the respective region. The numbers of animals contributing to the estimated animal production was also computed using herd dynamics models coupled with information on mortalities, reproduction and productivity for these two main systems for each region.

The calculations of biomass consumption and productivity estimations from different species in each region and system followed several stages. We first developed feasible diets for each species in each region and production system. The proportions of each feed in the diet of each species was obtained from extensive information available in the literature and from databases and feeding practice surveys at key research centres in the world (i.e. FAO, ILRI, NDDDB). Data on feed quality was obtained from the databases containing regional feed composition data for each feed. We then estimated productivity. For ruminants, the information on the quantity and quality of the different feeds was then used to parameterise an IPCC tier 3 digestion and metabolism model (RUMINANT, Herrero et al 2002), as described in Herrero et al (2013) The model estimated productivity (milk, meat), methane emissions and manure and N excretion. For monogastrics, information on feed quality was used to estimate feed intake, productivity and feed use efficiency using standard nutrient requirements guidelines (NRC 2008).

All information on animal production (bovine milk, bovine meat, sheep and goat milk, sheep and goat meat, pork, poultry and eggs) and for grains as feed was harmonised with FAOSTAT's commodity balance sheets at national level following an iterative procedure restricted to deviate +/- 20% from the statistical data in FAOSTAT. More information of this process can be obtained in the supplementary information and in Havlik et al. (2013).

**Fish production data and maps:** Landings of marine and freshwater fishes, both wild caught and aquaculture production was mapped to 30-min spatial cells. Marine capture fisheries data was sourced from <http://dx.doi.org/10.4226/77/58293083b0515> and this represents a harmonized and mapped compilation of global catch from 1950 to 2014 sourced in turn from the United Nations Food and Agriculture Organization's (FAO) Capture Production 1950-2014 dataset (Release date: March 2016 [www.fao.org](http://www.fao.org)), International Committee for the Exploration of the Sea (ICES) 1950-2014 ([www.ices.dk](http://www.ices.dk)), Northwest Atlantic Fisheries Organisation (NAFO) Catch and Effort 1960-2014 ([www.nafo.int](http://www.nafo.int)), Southeast Atlantic (SEAFO) Capture Production 1975-2014 (Release date: June 2016) ([www.seafo.org](http://www.seafo.org)), General Fisheries Commission for the Mediterranean (GFCM) Capture production 1970-2014 (Release date: April 2016) ([www.gfcm.org](http://www.gfcm.org)), Fishery Committee for the Eastern Central Atlantic (ECAFC) Capture production 1970-2014 (Release date: May 2016) ([www.fao.org/fishery/rfb/ecaf](http://www.fao.org/fishery/rfb/ecaf)), Commission for the Conservation of Antarctic Marine Living Resources (CCAMLR) Statistical Bulletin 2016 Vol. 28 1970-2014 ([www.ccamlr.org](http://www.ccamlr.org)) and Sea Around Us project (SAUP) – records for FAO area 18 (Arctic) v1 1950 TO 2010 (extrapolated to 2014) ([www.seaaroundus.org](http://www.seaaroundus.org)). See description in <sup>1,2</sup>(and references therein) for fuller details of marine data treatment.

Aquaculture was sourced from FAO (Aquaculture Production (Quantities and values) 1950-2014 (Release date: March 2016 [www.fao.org](http://www.fao.org)). Marine and brackish species aquaculture production was mapped to the reporting country's coastal cells equally. Both freshwater capture (from FAO capture sources) and freshwater species aquaculture production (from FAO's aquaculture source) were mapped to spatial cells within the reporting country which contained lakes, reservoirs or permanent rivers (codes 1-4 inclusive from the Global Lakes and Wetlands Database GLWD Level 3)<sup>3</sup>. Each reported tonnage was mapped equally to candidate cells.

**Nutrient composition and nutrient requirements:** The quantity of specific nutrients needed from the diet varies according to physiological requirements that vary by age, gender and for women, whether they are pregnant or lactating, and the extent to which a nutrient is utilized by the body, also known as

bioavailability. Where possible, we use the Recommended Dietary Allowance (RDA) which represents the average intake that would meet the needs of 97.5 percent of healthy individuals in a group. Where an RDA was not available for certain nutrients or population groups, we used Adequate Intake (AI), which is the level of intake assumed to be adequate for healthy individuals.

The measures used in this paper were developed by the US Institute of Medicine (I).

The nutrient requirements used in this paper are for a representative consumer, weighting each age and gender group by its population. We used the baseline population estimates for Shared Socioeconomic Pathway 2 (Fricko et al. 2016). The SSP population data set does not include the number of pregnant and lactating women so these were estimated by assuming that each is 20 percent of the number of children in the age group 0 to 4.

**Calculation of diversity metrics:** We calculated three diversity metrics based on all crop, livestock and fish products used in the analysis (Remans et al., 2014):

1. the Shannon diversity index, H, which reflects how many different types of foods are produced in a pixel, and how evenly these different types are distributed;
2. The species richness, S, a simple count of the number of commodities produced in each pixel;
3. the Modified Functional Attribute Diversity index (MFAD), the sum of pairwise distances between functional units in terms of nutrient composition for calcium, folate, iron, protein, vitamin A, vitamin B12, zinc. This reflects the diversity in nutrient composition of foods produced in each pixel.

Shannon diversity metric (H)

$$H = \sum_{i=1}^s - (P_i * \ln P_i)$$

Where:

H = the Shannon diversity index

P<sub>i</sub> = fraction of the entire population made up of species i

S = numbers of species encountered

Modified Functional Attribute Diversity (MFAD)

$$MFAD = \frac{\sum_{i=1}^S \sum_{j=1}^S d_{ij}}{N}$$

Where:

MFAD = Modified Functional Attribute Diversity

d<sub>ij</sub> = Euclidean distance between functional traits of species

S = numbers of species encountered

∑ = sum from species 1 to species S

N = total number of # functional units

Table S1. Countries in the analysis and their regional allocation: Central America & the Caribbean (CAM), East Asia & the Pacific (EAP), Europe (EUR), North America (NAM), South Asia (SA), South America (SAM), Southeast Asia (SEA), sub-Saharan Africa (SSA), West Asia-North Africa (WANA). Other allocations: Australia and New Zealand (AUS) and China (CHN).

|                         |     |                      |     |                       |     |                         |      |
|-------------------------|-----|----------------------|-----|-----------------------|-----|-------------------------|------|
| Australia               | AUS | Lithuania            | EUR | Cambodia              | SEA | Rwanda                  | SSA  |
| Belize                  | CAM | Luxembourg           | EUR | Indonesia             | SEA | Senegal                 | SSA  |
| Costa Rica              | CAM | Macedonia            | EUR | Laos                  | SEA | Sierra Leone            | SSA  |
| Cuba                    | CAM | Montenegro           | EUR | Malaysia              | SEA | Somalia                 | SSA  |
| Dominica                | CAM | Netherlands          | EUR | Myanmar               | SEA | South Africa            | SSA  |
| Dominican Rep           | CAM | Norway               | EUR | Philippines           | SEA | Swaziland               | SSA  |
| El Salvador             | CAM | Poland               | EUR | South Korea           | SEA | Tanzania                | SSA  |
| Grenada                 | CAM | Portugal             | EUR | Thailand              | SEA | Togo                    | SSA  |
| Guatemala               | CAM | Romania              | EUR | Viet Nam              | SEA | Uganda                  | SSA  |
| Haiti                   | CAM | Russia               | EUR | Angola                | SSA | Zambia                  | SSA  |
| Honduras                | CAM | Serbia               | EUR | Benin                 | SSA | Zimbabwe                | SSA  |
| Jamaica                 | CAM | Slovakia             | EUR | Botswana              | SSA | Algeria                 | WANA |
| Mexico                  | CAM | Slovenia             | EUR | Burkina Faso          | SSA | Armenia                 | WANA |
| Nicaragua               | CAM | Spain                | EUR | Burundi               | SSA | Azerbaijan              | WANA |
| Panama                  | CAM | Sweden               | EUR | Cameroon              | SSA | Cyprus                  | WANA |
| Saint Lucia             | CAM | Switzerland          | EUR | Central Afr Rep       | SSA | Egypt                   | WANA |
| St Vincent & Gren       | CAM | Ukraine              | EUR | Chad                  | SSA | Georgia                 | WANA |
| Trinidad & Tobago       | CAM | UK                   | EUR | Congo                 | SSA | Iran                    | WANA |
| China                   | CHN | Canada               | NAM | Côte d'Ivoire         | SSA | Iraq                    | WANA |
| Japan                   | EAP | USA                  | NAM | Dem Republic<br>Congo | SSA | Israel                  | WANA |
| Mongolia                | EAP | New Zealand          | AUS | Djibouti              | SSA | Jordan                  | WANA |
| Papua New Guinea        | EAP | Afghanistan          | SA  | Equatorial Guinea     | SSA | Kazakhstan              | WANA |
| Albania                 | EUR | Bangladesh           | SA  | Eritrea               | SSA | Kuwait                  | WANA |
| Austria                 | EUR | Bhutan               | SA  | Ethiopia              | SSA | Kyrgyzstan              | WANA |
| Belarus                 | EUR | India                | SA  | Gabon                 | SSA | Lebanon                 | WANA |
| Belgium                 | EUR | Nepal                | SA  | Gambia                | SSA | Libya                   | WANA |
| Bosnia &<br>Herzegovina | EUR | Pakistan             | SA  | Ghana                 | SSA | Morocco                 | WANA |
| Bulgaria                | EUR | Sri Lanka            | SA  | Guinea                | SSA | Oman                    | WANA |
| Croatia                 | EUR | Argentina            | SAM | Guinea-Bissau         | SSA | Palestine               | WANA |
| Czech Republic          | EUR | Bolivia              | SAM | Kenya                 | SSA | Qatar                   | WANA |
| Denmark                 | EUR | Brazil               | SAM | Lesotho               | SSA | Saudi Arabia            | WANA |
| Estonia                 | EUR | Chile                | SAM | Liberia               | SSA | Sudan<br>(former)       | WANA |
| Finland                 | EUR | Colombia             | SAM | Madagascar            | SSA | Syria                   | WANA |
| France                  | EUR | Ecuador              | SAM | Malawi                | SSA | Tajikistan              | WANA |
| Germany                 | EUR | Guyana               | SAM | Mali                  | SSA | Tunisia                 | WANA |
| Greece                  | EUR | Paraguay             | SAM | Mauritania            | SSA | Turkey                  | WANA |
| Hungary                 | EUR | Peru                 | SAM | Mauritius             | SSA | Turkmenistan            | WANA |
| Iceland                 | EUR | Suriname             | SAM | Mozambique            | SSA | United Arab<br>Emirates | WANA |
| Ireland                 | EUR | Uruguay              | SAM | Namibia               | SSA | Uzbekistan              | WANA |
| Italy                   | EUR | Venezuela            | SAM | Niger                 | SSA | Yemen                   | WANA |
| Latvia                  | EUR | Brunei<br>Darussalam | SEA | Nigeria               | SSA |                         |      |



Table S2 - Food groups and commodities

| <b>Group</b>   | <b>Commodities</b>                                                                                                                                                                                      |
|----------------|---------------------------------------------------------------------------------------------------------------------------------------------------------------------------------------------------------|
| Fruit          | apple, banana, date, grapefruit, grape, orange, pineapple, plantain, citrusnes*, fruitnes*                                                                                                              |
| Cereals        | barley, maize, millet, oats, rice, rye, sorghum, wheat, cerealnes*                                                                                                                                      |
| Pulses         | bean, pea, pulsenes*                                                                                                                                                                                    |
| Roots & tubers | cassava, potato, sweetpotato, yam, rootnes*                                                                                                                                                             |
| Oil crops      | coconut, olive, oilpalm, rapeseed, sesame, soybean, sunflower, oilseednes*                                                                                                                              |
| Fiber          | cotton                                                                                                                                                                                                  |
| Vegetables     | onion, tomato, vegetablenes*                                                                                                                                                                            |
| Sugar crops    | sugarbeet, sugarcane                                                                                                                                                                                    |
| Livestock      | Bovine meat, bovine milk, sheep and goat meat, sheep and goat milk, pork, eggs, poultry meat                                                                                                            |
| Fish           | Aquaculture, ClamOyster, DemersalFish, FreshwaterAmphibian, FreshwaterCrustacean, FreshwaterFish, FreshwaterMollusc, FreshwaterReptile, LobsterCrab, Plants, Shrimp, SmallPelagic, Squid, TunaSwordfish |

\* nes = 'not elsewhere specified', as used by FAO and mapped by EARTHStat (see p4).

## 2. Supplementary tables figures

### Nutrient production maps

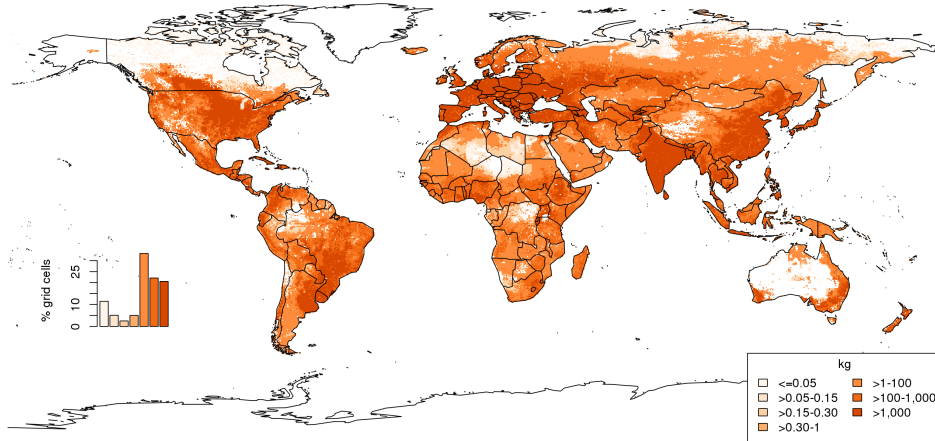

Figure S1. The spatial distribution of global calcium production (kg)

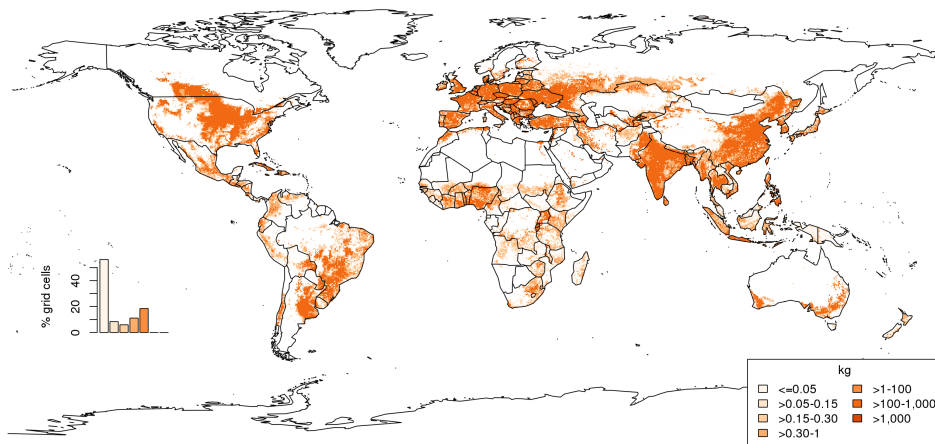

Figure S2. The spatial distribution of global folate production (kg)

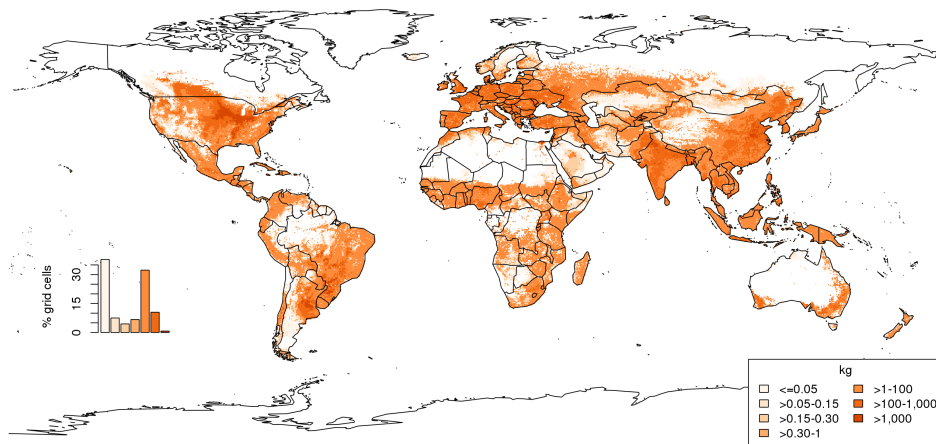

**Figure S3. The spatial distribution of global iron production (kg)**

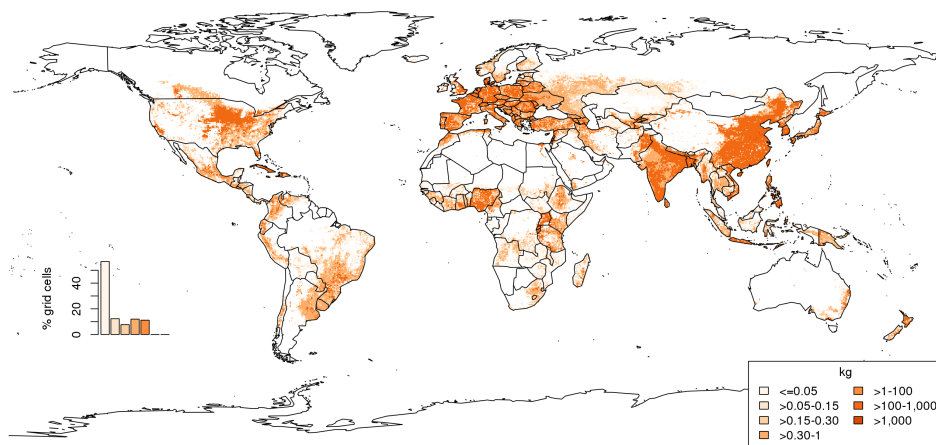

**Figure S4. The spatial distribution of global vitamin A production (kg)**

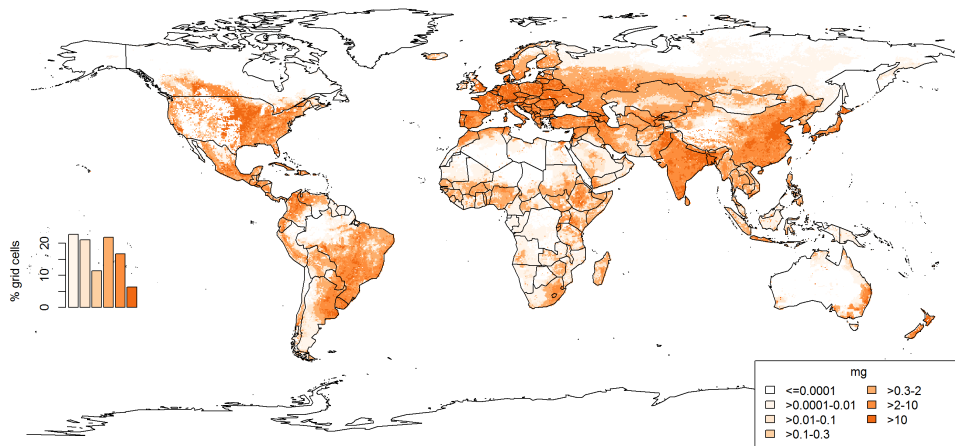

**Figure S5. The spatial distribution of global vitamin B12 production (mg)**

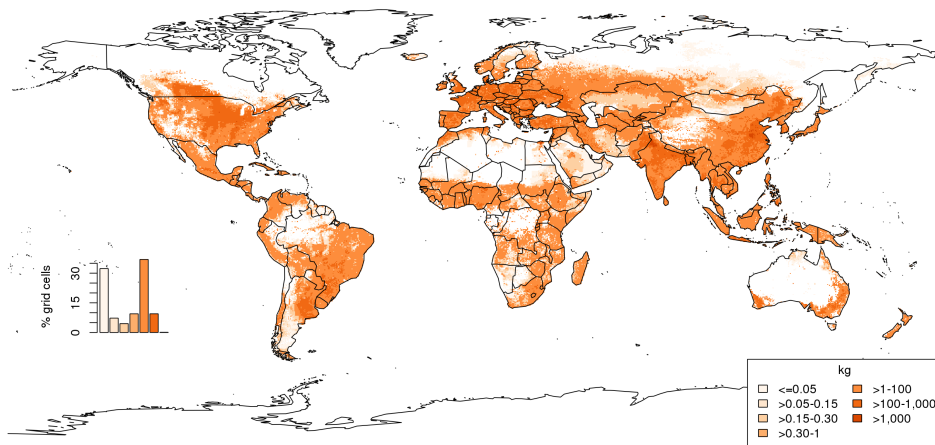

**Figure S6. The spatial distribution of global zinc production (kg)**

## Nutritional diversity maps and tables

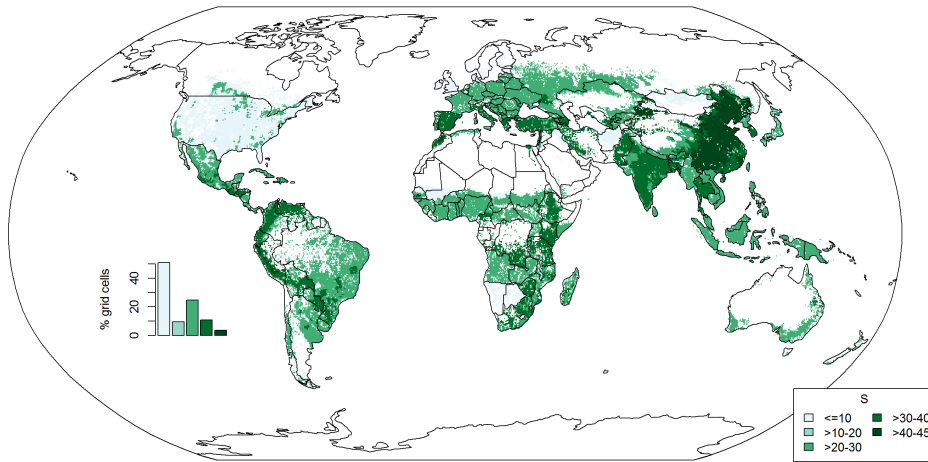

Figure S7. Global species richness (S) of food commodities

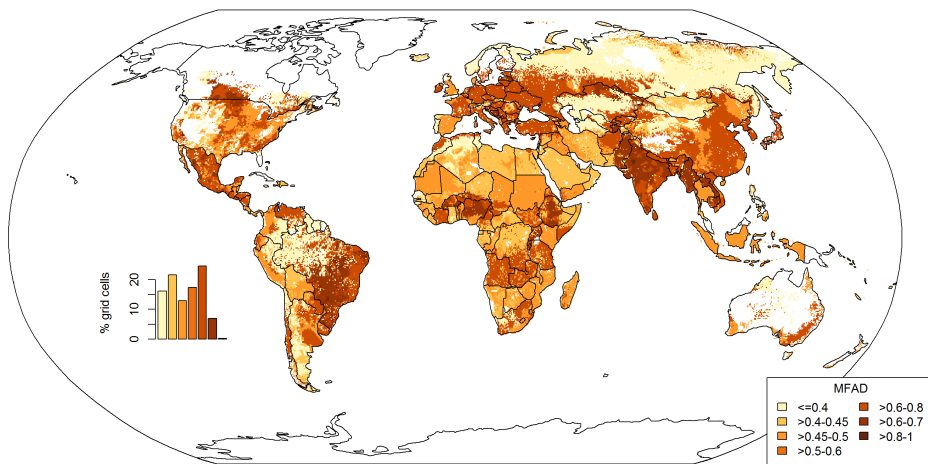

Figure S8. Global modified functional attribute diversity (MFAD) of food commodities

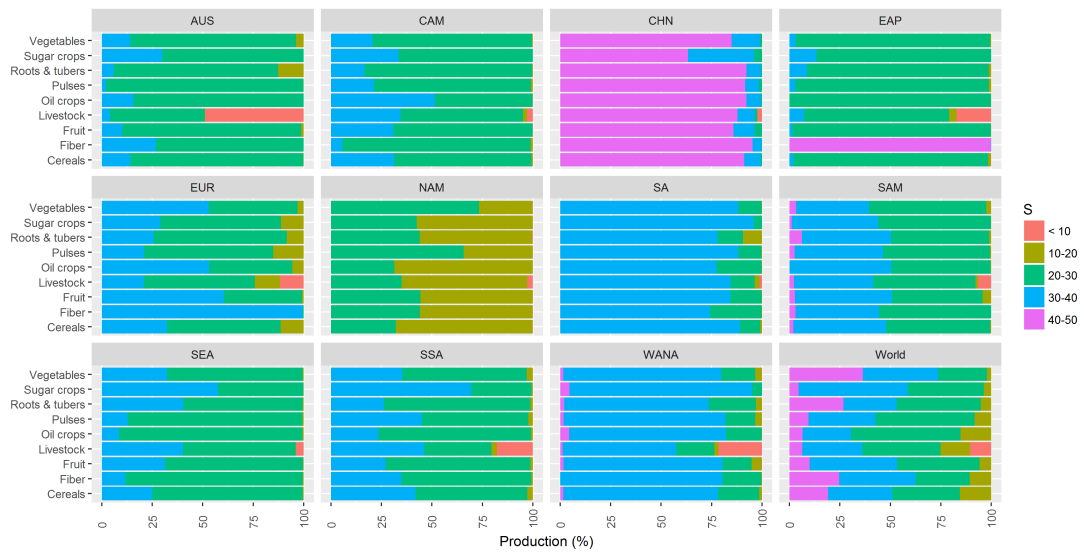

**Figure S9. The regional relative production of different food commodity groups by species richness category**

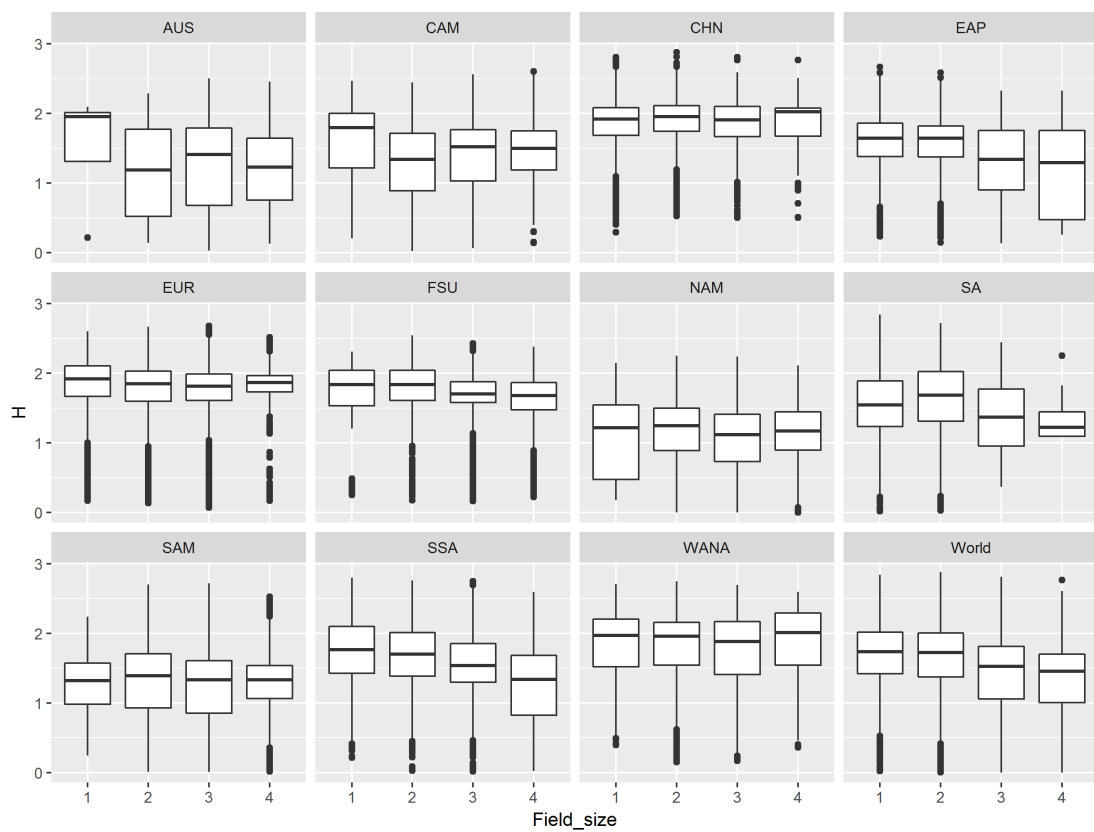

**Figure S10. Boxplots of Shannon index by plot size by region. (1=<0.5 ha; 2=0.5-2 ha, 3=2-100 ha, 4=>100 ha)**

### 3. Results data

|                    | Calcium production (T) |           |            |             |          |
|--------------------|------------------------|-----------|------------|-------------|----------|
|                    | < 2 ha                 | 2 - 20 ha | 20 - 50 ha | 50 - 200 ha | > 200 ha |
| <b>Afghanistan</b> |                        |           |            |             |          |
| Cereals            | 340.87                 | 840.42    | 108.94     | 364.96      | 0        |
| Fiber              | 0.84                   | 26.87     | 4.77       | 0.87        | 0        |
| Fruit              | 4.81                   | 28.34     | 4.5        | 0.84        | 0        |
| Livestock          | 874.37                 | 1141.23   | 105.16     | 18.59       | 0        |
| Oil crops          | 132.86                 | 169.06    | 14.89      | 2.72        | 0        |
| Pulses             | 2.94                   | 6.18      | 0.75       | 1.51        | 0        |
| Roots & tubers     | 6.97                   | 15.29     | 1.89       | 2.88        | 0        |
| Sugar crops        | 0.43                   | 0.84      | 0.1        | 0.02        | 0        |
| Vegetables         | 0                      | 0         | 0          | 0           | 0        |
| <b>Albania</b>     |                        |           |            |             |          |
| Cereals            | 18.7                   | 59.09     | 15.17      | 15.22       | 0.71     |
| Fiber              | 0.07                   | 0.38      | 0.21       | 0.3         | 0.01     |
| Fruit              | 1.77                   | 6.98      | 2.73       | 3.51        | 0.16     |
| Livestock          | 252.21                 | 764.56    | 174.16     | 156.41      | 7.26     |
| Oil crops          | 3.14                   | 11.93     | 4.42       | 5.56        | 0.26     |
| Pulses             | 5.85                   | 17.12     | 3.46       | 2.7         | 0.13     |
| Roots & tubers     | 2.3                    | 7.61      | 2.19       | 2.4         | 0.11     |
| Sugar crops        | 0.94                   | 2.93      | 0.73       | 0.71        | 0.03     |
| Vegetables         | 4.77                   | 14.69     | 3.52       | 3.32        | 0.15     |
| <b>Algeria</b>     |                        |           |            |             |          |
| Cereals            | 144.17                 | 536.12    | 158.86     | 182.1       | 246.97   |
| Fiber              | 0.01                   | 0.02      | 0.01       | 0.01        | 0.01     |
| Fruit              | 63                     | 260.17    | 88.08      | 48.93       | 20.78    |
| Livestock          | 329.32                 | 1228.11   | 363.15     | 332.93      | 370.95   |
| Oil crops          | 33.99                  | 103.38    | 25.43      | 39.25       | 63.74    |
| Pulses             | 0.36                   | 1.31      | 0.38       | 0.46        | 0.66     |
| Roots & tubers     | 24.99                  | 80.61     | 21.23      | 21.47       | 27.03    |
| Sugar crops        | 0                      | 0         | 0          | 0           | 0        |
| Vegetables         | 29.8                   | 112.5     | 33.9       | 25.98       | 23.13    |
| <b>Angola</b>      |                        |           |            |             |          |
| Cereals            | 14.58                  | 28.6      | 3.13       | 1.82        | 0        |
| Fiber              | 0.93                   | 2.17      | 0.27       | 0.29        | 0        |
| Fruit              | 12.59                  | 24.28     | 2.65       | 1.95        | 0        |
| Livestock          | 99.91                  | 137.32    | 10.12      | 24.79       | 0        |
| Oil crops          | 11.41                  | 20.55     | 2.08       | 1.47        | 0        |
| Pulses             | 32.61                  | 75.17     | 9.24       | 9.22        | 0        |
| Roots & tubers     | 375.68                 | 872.3     | 107.92     | 77.61       | 0        |
| Sugar crops        | 1.15                   | 2.59      | 0.32       | 0.26        | 0        |
| Vegetables         | 0.37                   | 0.84      | 0.1        | 0.09        | 0        |
| <b>Argentina</b>   |                        |           |            |             |          |

|                   |        |         |         |          |           |
|-------------------|--------|---------|---------|----------|-----------|
| Cereals           | 4.23   | 100.11  | 153.22  | 812.62   | 5999.89   |
| Fiber             | 1.31   | 22.33   | 24.26   | 66.41    | 356.18    |
| Fruit             | 0.24   | 8.04    | 14.59   | 80.76    | 518.97    |
| Livestock         | 71.57  | 1148.31 | 1127.6  | 2130.61  | 8080.54   |
| Oil crops         | 44.44  | 1233.36 | 2102.55 | 12889.39 | 102048.76 |
| Pulses            | 0.49   | 11.76   | 18.76   | 72       | 261.77    |
| Roots & tubers    | 0.8    | 15.62   | 20.62   | 61.26    | 171.38    |
| Sugar crops       | 0.58   | 13      | 19.99   | 66.59    | 149.2     |
| Vegetables        | 0.11   | 3.21    | 5.51    | 28.41    | 174.33    |
| <b>Armenia</b>    |        |         |         |          |           |
| Cereals           | 8.69   | 63.99   | 26.41   | 13.94    | 2.4       |
| Fiber             | 0      | 0       | 0       | 0        | 0         |
| Fruit             | 2.05   | 15.18   | 6.27    | 3.31     | 0.57      |
| Livestock         | 83.48  | 434.06  | 159.22  | 82.34    | 14.15     |
| Oil crops         | 0      | 0       | 0       | 0        | 0         |
| Pulses            | 0.41   | 3.03    | 1.25    | 0.66     | 0.11      |
| Roots & tubers    | 3.8    | 28.07   | 11.59   | 6.12     | 1.06      |
| Sugar crops       | 0.26   | 1.39    | 0.54    | 0.27     | 0.05      |
| Vegetables        | 2.65   | 21.12   | 8.86    | 4.71     | 0.81      |
| <b>Australia</b>  |        |         |         |          |           |
| Cereals           | 0      | 14.99   | 64.65   | 604.94   | 8330.92   |
| Fiber             | 0      | 1.48    | 6.71    | 65.36    | 1155.78   |
| Fruit             | 0      | 0.59    | 2.7     | 24.89    | 325.75    |
| Livestock         | 0      | 26.74   | 103.33  | 957.65   | 11173.54  |
| Oil crops         | 0      | 7.03    | 29.91   | 270.29   | 2852.85   |
| Pulses            | 0      | 0.2     | 0.93    | 9.09     | 162.04    |
| Roots & tubers    | 0      | 0.33    | 1.34    | 11.95    | 108.69    |
| Sugar crops       | 0      | 0.48    | 3.02    | 26.8     | 340.86    |
| Vegetables        | 0      | 0.2     | 0.85    | 7.64     | 76.31     |
| <b>Austria</b>    |        |         |         |          |           |
| Cereals           | 94.18  | 368.44  | 161.92  | 289.41   | 34.87     |
| Fiber             | 0      | 0       | 0       | 0        | 0         |
| Fruit             | 6.59   | 24.06   | 9.23    | 14.91    | 1.63      |
| Livestock         | 159.17 | 1096.18 | 796.92  | 1642.47  | 201.51    |
| Oil crops         | 57.13  | 218.88  | 92.87   | 162.91   | 19.42     |
| Pulses            | 2.76   | 11.11   | 5.08    | 9.16     | 1.1       |
| Roots & tubers    | 7.76   | 27.4    | 9.91    | 15.76    | 1.77      |
| Sugar crops       | 39.88  | 143.25  | 54.22   | 90.16    | 10.61     |
| Vegetables        | 2.3    | 9.26    | 4.23    | 7.63     | 0.91      |
| <b>Azerbaijan</b> |        |         |         |          |           |
| Cereals           | 97.93  | 314.79  | 84.76   | 67.34    | 67.56     |
| Fiber             | 22.03  | 70.78   | 19.04   | 15.17    | 15.27     |
| Fruit             | 2.96   | 9.5     | 2.55    | 2.02     | 2.01      |
| Livestock         | 237.64 | 750.94  | 194.47  | 186.48   | 225.67    |
| Oil crops         | 1.1    | 3.55    | 0.96    | 0.76     | 0.76      |
| Pulses            | 2.07   | 7.81    | 2.38    | 1.7      | 1.37      |



|                   |         |         |        |         |        |
|-------------------|---------|---------|--------|---------|--------|
| Roots & tubers    | 14.64   | 46.57   | 12.39  | 9.92    | 10.07  |
| Sugar crops       | 2.19    | 7.11    | 1.94   | 1.5     | 1.46   |
| Vegetables        | 13.08   | 41.63   | 11.15  | 7.12    | 4.95   |
| <b>Bangladesh</b> |         |         |        |         |        |
| Cereals           | 2958.03 | 6554.35 | 812.54 | 1531.72 | 0      |
| Fiber             | 13.21   | 29.56   | 3.71   | 3.99    | 0      |
| Fruit             | 13.04   | 28.99   | 3.6    | 8.44    | 0      |
| Livestock         | 1294.28 | 2306.44 | 253.38 | 452.65  | 0      |
| Oil crops         | 203.79  | 561.05  | 75.88  | 140.09  | 0      |
| Pulses            | 19.74   | 45.49   | 5.73   | 12.59   | 0      |
| Roots & tubers    | 128.78  | 269.99  | 32.55  | 96.87   | 0      |
| Sugar crops       | 14.84   | 31.1    | 3.76   | 9.32    | 0      |
| Vegetables        | 42.76   | 91.76   | 11.21  | 21.53   | 0      |
| <b>Belarus</b>    |         |         |        |         |        |
| Cereals           | 131.02  | 497.43  | 207.27 | 600.31  | 210.03 |
| Fiber             | 0       | 0       | 0      | 0       | 0      |
| Fruit             | 0.37    | 3.26    | 2.63   | 8.97    | 3.09   |
| Livestock         | 548.58  | 2094.19 | 875.44 | 2626.61 | 954.41 |
| Oil crops         | 37.92   | 144.01  | 60.23  | 172.47  | 59.36  |
| Pulses            | 10.72   | 40.8    | 17.07  | 48.94   | 16.92  |
| Roots & tubers    | 13.92   | 124.98  | 101.39 | 377.02  | 140.43 |
| Sugar crops       | 7.3     | 68.33   | 56.75  | 221.05  | 84.73  |
| Vegetables        | 4.61    | 18.06   | 7.81   | 20.86   | 6.69   |
| <b>Belgium</b>    |         |         |        |         |        |
| Cereals           | 41.88   | 172.12  | 82.77  | 306.51  | 123.49 |
| Fiber             | 0       | 0       | 0      | 0       | 0      |
| Fruit             | 1.66    | 6.04    | 2.39   | 6.52    | 2.15   |
| Livestock         | 94.53   | 672.1   | 497.56 | 1799.36 | 660.29 |
| Oil crops         | 0.17    | 4.9     | 5.56   | 51.9    | 28.4   |
| Pulses            | 0.15    | 0.61    | 0.29   | 0.74    | 0.2    |
| Roots & tubers    | 33.82   | 112.99  | 35.82  | 61.76   | 12.52  |
| Sugar crops       | 43.47   | 182.52  | 88.95  | 291.88  | 107.6  |
| Vegetables        | 2.87    | 10.76   | 4.41   | 11.4    | 3.54   |
| <b>Belize</b>     |         |         |        |         |        |
| Cereals           | 0.14    | 1.27    | 3.32   | 1.41    | 0.63   |
| Fiber             | 0       | 0       | 0      | 0       | 0      |
| Fruit             | 1.63    | 14.68   | 38.6   | 16.49   | 7.61   |
| Livestock         | 0.5     | 1.34    | 1.69   | 0.8     | 0.54   |
| Oil crops         | 0.03    | 0.24    | 0.64   | 0.27    | 0.13   |
| Pulses            | 0.11    | 1.01    | 2.71   | 1.22    | 0.71   |
| Roots & tubers    | 0       | 0.03    | 0.07   | 0.03    | 0.02   |
| Sugar crops       | 0.22    | 2       | 5.29   | 2.32    | 1.19   |
| Vegetables        | 0       | 0.01    | 0.03   | 0.01    | 0.01   |
| <b>Benin</b>      |         |         |        |         |        |
| Cereals           | 24.82   | 49.44   | 5.55   | 0.03    | 0      |
| Fiber             | 56.16   | 178.76  | 25.59  | 0.14    | 0      |

|                                         |        |        |        |        |         |
|-----------------------------------------|--------|--------|--------|--------|---------|
| Fruit                                   | 4.67   | 7.86   | 0.75   | 0      | 0       |
| Livestock                               | 19.52  | 32.12  | 2.99   | 0.01   | 0       |
| Oil crops                               | 48.37  | 65.57  | 5      | 0.01   | 0       |
| Pulses                                  | 48.75  | 83.9   | 8.34   | 0.03   | 0       |
| Roots & tubers                          | 299.44 | 374.93 | 23.62  | 0.03   | 0       |
| Sugar crops                             | 0.16   | 0.29   | 0.03   | 0      | 0       |
| Vegetables                              | 5.34   | 9.3    | 0.94   | 0      | 0       |
| <b>Bhutan</b>                           |        |        |        |        |         |
| Cereals                                 | 11.55  | 16.54  | 1.53   | 0.31   | 0       |
| Fiber                                   | 0      | 0      | 0      | 0      | 0       |
| Fruit                                   | 4.61   | 6.74   | 0.63   | 0.13   | 0       |
| Livestock                               | 20.06  | 29.14  | 2.7    | 0.55   | 0       |
| Oil crops                               | 1.55   | 2.31   | 0.22   | 0.04   | 0       |
| Pulses                                  | 2.51   | 3.11   | 0.27   | 0.05   | 0       |
| Roots & tubers                          | 2.14   | 2.95   | 0.27   | 0.05   | 0       |
| Sugar crops                             | 0.05   | 0.07   | 0.01   | 0      | 0       |
| Vegetables                              | 0.05   | 0.06   | 0.01   | 0      | 0       |
| <b>Bolivia (Plurinational State of)</b> |        |        |        |        |         |
| Cereals                                 | 1.37   | 22.59  | 23.15  | 48.17  | 174.84  |
| Fiber                                   | 0.31   | 5.38   | 5.99   | 16.46  | 79.91   |
| Fruit                                   | 0.47   | 7.29   | 6.84   | 9.88   | 20.93   |
| Livestock                               | 4.71   | 74.66  | 71.9   | 111.05 | 209.99  |
| Oil crops                               | 3.62   | 86.28  | 133.32 | 620.2  | 3740.69 |
| Pulses                                  | 0.4    | 6.28   | 6.02   | 9.71   | 25.82   |
| Roots & tubers                          | 1.51   | 23.52  | 21.8   | 28.91  | 42.75   |
| Sugar crops                             | 0.1    | 1.89   | 2.4    | 8.53   | 46.13   |
| Vegetables                              | 0.11   | 1.81   | 1.77   | 3.23   | 11.38   |
| <b>Bosnia and Herzegovina</b>           |        |        |        |        |         |
| Cereals                                 | 16.91  | 64.48  | 27.8   | 51.09  | 6.56    |
| Fiber                                   | 0      | 0      | 0      | 0      | 0       |
| Fruit                                   | 0.45   | 1.87   | 0.91   | 1.77   | 0.23    |
| Livestock                               | 98.61  | 366.71 | 144.6  | 235.17 | 25.47   |
| Oil crops                               | 3.07   | 12.91  | 6.55   | 13.16  | 1.79    |
| Pulses                                  | 1.85   | 7.06   | 3.04   | 5.49   | 0.68    |
| Roots & tubers                          | 3.92   | 14.75  | 6.23   | 11.34  | 1.45    |
| Sugar crops                             | 0      | 0      | 0      | 0      | 0       |
| Vegetables                              | 1.1    | 4.22   | 1.81   | 3.27   | 0.41    |
| <b>Botswana</b>                         |        |        |        |        |         |
| Cereals                                 | 0.51   | 2.33   | 0.37   | 1.12   | 0       |
| Fiber                                   | 0.39   | 1.44   | 0.22   | 0.36   | 0       |
| Fruit                                   | 0.01   | 0.17   | 0.03   | 0.01   | 0       |
| Livestock                               | 8.51   | 60.67  | 10.41  | 48.7   | 0       |
| Oil crops                               | 0.25   | 1.1    | 0.18   | 0.63   | 0       |
| Pulses                                  | 0.23   | 1      | 0.16   | 0.83   | 0       |
| Roots & tubers                          | 0      | 0      | 0      | 0      | 0       |

|                          |        |         |         |          |           |
|--------------------------|--------|---------|---------|----------|-----------|
| Sugar crops              | 0      | 0       | 0       | 0        | 0         |
| Vegetables               | 0.01   | 0.06    | 0.01    | 0.02     | 0         |
| <b>Brazil</b>            |        |         |         |          |           |
| Cereals                  | 14.4   | 261.89  | 312.27  | 1011.33  | 5508.62   |
| Fiber                    | 0.89   | 29.37   | 53.46   | 368.55   | 3107.16   |
| Fruit                    | 39.25  | 615.12  | 575.3   | 949.29   | 3699.11   |
| Livestock                | 207.49 | 3304.91 | 3215.65 | 5821.2   | 20986.3   |
| Oil crops                | 41.32  | 1171.94 | 2021    | 14533.91 | 131852.45 |
| Pulses                   | 38.98  | 607.66  | 565.06  | 818.43   | 2057.83   |
| Roots & tubers           | 35.45  | 560.53  | 537.19  | 846.95   | 2005.11   |
| Sugar crops              | 2.37   | 67.67   | 117.31  | 623.34   | 4022.89   |
| Vegetables               | 4.72   | 74.73   | 71.63   | 115.61   | 309.35    |
| <b>Brunei Darussalam</b> |        |         |         |          |           |
| Cereals                  | 0      | 0.21    | 0.03    | 0.01     | 0         |
| Fiber                    | 0      | 0       | 0       | 0        | 0         |
| Fruit                    | 0      | 0.2     | 0.03    | 0.01     | 0         |
| Livestock                | 0      | 3.57    | 0.49    | 0.23     | 0         |
| Oil crops                | 0      | 0.02    | 0       | 0        | 0         |
| Pulses                   | 0      | 0       | 0       | 0        | 0         |
| Roots & tubers           | 0      | 0.31    | 0.04    | 0.02     | 0         |
| Sugar crops              | 0      | 0       | 0       | 0        | 0         |
| Vegetables               | 0      | 0       | 0       | 0        | 0         |
| <b>Bulgaria</b>          |        |         |         |          |           |
| Cereals                  | 46.35  | 264.29  | 173.19  | 601.14   | 215.87    |
| Fiber                    | 0.26   | 0.69    | 0.08    | 0.01     | 0         |
| Fruit                    | 3.52   | 12.05   | 4.15    | 9.37     | 2.73      |
| Livestock                | 178.24 | 642.14  | 243.44  | 620.64   | 198.39    |
| Oil crops                | 11.46  | 80.83   | 60.7    | 254.84   | 103.69    |
| Pulses                   | 0.59   | 2.61    | 1.37    | 4.41     | 1.55      |
| Roots & tubers           | 2.31   | 10.02   | 5.42    | 12.03    | 2.02      |
| Sugar crops              | 0.04   | 0.45    | 0.39    | 1.41     | 0.49      |
| Vegetables               | 1.08   | 4.45    | 2.15    | 7.13     | 2.65      |
| <b>Burkina Faso</b>      |        |         |         |          |           |
| Cereals                  | 93.05  | 184.08  | 20.28   | 49.82    | 0         |
| Fiber                    | 161.98 | 300.21  | 32.7    | 121.76   | 0         |
| Fruit                    | 0.04   | 0.09    | 0.01    | 0.03     | 0         |
| Livestock                | 166.38 | 223.23  | 16.58   | 30.68    | 0         |
| Oil crops                | 25.12  | 87.97   | 13.13   | 107.54   | 0         |
| Pulses                   | 2.47   | 3.59    | 0.29    | 0.77     | 0         |
| Roots & tubers           | 4.3    | 8.99    | 1.03    | 4.7      | 0         |
| Sugar crops              | 0.3    | 1.63    | 0.27    | 2.31     | 0         |
| Vegetables               | 0.24   | 0.52    | 0.06    | 0.14     | 0         |
| <b>Burundi</b>           |        |         |         |          |           |
| Cereals                  | 18.88  | 22.74   | 1.17    | 0        | 0         |
| Fiber                    | 2.21   | 2.66    | 0.14    | 0        | 0         |
| Fruit                    | 23.21  | 27.96   | 1.44    | 0        | 0         |

|                                 |        |         |         |          |          |
|---------------------------------|--------|---------|---------|----------|----------|
| Livestock                       | 19.93  | 24.04   | 1.27    | 0        | 0        |
| Oil crops                       | 3.35   | 4.03    | 0.2     | 0        | 0        |
| Pulses                          | 122.9  | 148.03  | 7.58    | 0.01     | 0        |
| Roots & tubers                  | 118.59 | 142.87  | 7.36    | 0.01     | 0        |
| Sugar crops                     | 0.53   | 0.63    | 0.03    | 0        | 0        |
| Vegetables                      | 0      | 0       | 0       | 0        | 0        |
| <b>Cambodia</b>                 |        |         |         |          |          |
| Cereals                         | 492.98 | 1178.57 | 83.1    | 34.25    | 0        |
| Fiber                           | 0.09   | 0.16    | 0.01    | 0        | 0        |
| Fruit                           | 7.66   | 15.32   | 0.92    | 0.36     | 0        |
| Livestock                       | 19.28  | 35.22   | 1.72    | 0.61     | 0        |
| Oil crops                       | 314.05 | 528.41  | 27.08   | 10.3     | 0        |
| Pulses                          | 24.2   | 40.66   | 1.95    | 0.71     | 0        |
| Roots & tubers                  | 78.89  | 140.69  | 7.41    | 2.8      | 0        |
| Sugar crops                     | 0.7    | 1.07    | 0.04    | 0.02     | 0        |
| Vegetables                      | 0      | 0       | 0       | 0        | 0        |
| <b>Cameroon</b>                 |        |         |         |          |          |
| Cereals                         | 68.39  | 105.22  | 9.1     | 5.74     | 0        |
| Fiber                           | 100.86 | 167.63  | 15.94   | 5.57     | 0        |
| Fruit                           | 27.99  | 43.06   | 3.68    | 6.27     | 0        |
| Livestock                       | 141.3  | 172.39  | 11.54   | 0.01     | 0        |
| Oil crops                       | 36.08  | 57.4    | 5.22    | 2.04     | 0        |
| Pulses                          | 137.94 | 167.39  | 9.51    | 0.02     | 0        |
| Roots & tubers                  | 128.76 | 228.1   | 22.82   | 82.22    | 0        |
| Sugar crops                     | 3.92   | 5.96    | 0.5     | 1.35     | 0        |
| Vegetables                      | 25.08  | 37.2    | 3.03    | 1.33     | 0        |
| <b>Canada</b>                   |        |         |         |          |          |
| Cereals                         | 5.32   | 1191.03 | 1828.75 | 5466.7   | 5776.75  |
| Fiber                           | 0      | 0       | 0       | 0        | 0        |
| Fruit                           | 0      | 2.09    | 4.1     | 13.69    | 8.03     |
| Livestock                       | 7.8    | 1611.46 | 2252.92 | 3937.39  | 2286.05  |
| Oil crops                       | 14     | 3155.9  | 4832.41 | 13421.74 | 13161.21 |
| Pulses                          | 0.46   | 107.76  | 171.7   | 559.48   | 612.13   |
| Roots & tubers                  | 0.22   | 51.27   | 83.94   | 187.07   | 113.24   |
| Sugar crops                     | 0.01   | 2.58    | 4.1     | 31.62    | 53.71    |
| Vegetables                      | 0.03   | 9.11    | 18.11   | 54.63    | 34.81    |
| <b>Central African Republic</b> |        |         |         |          |          |
| Cereals                         | 9.83   | 13.91   | 1.04    | 0        | 0        |
| Fiber                           | 1.3    | 1.57    | 0.08    | 0        | 0        |
| Fruit                           | 4.83   | 7.23    | 0.61    | 0        | 0        |
| Oil crops                       | 164.94 | 222.67  | 15.9    | 0.04     | 0        |
| Pulses                          | 2.55   | 4.77    | 0.51    | 0        | 0        |
| Roots & tubers                  | 56.02  | 72.01   | 4.69    | 0.01     | 0        |
| Sugar crops                     | 0.35   | 0.53    | 0.04    | 0        | 0        |
| Vegetables                      | 0      | 0       | 0       | 0        | 0        |
| <b>Chad</b>                     |        |         |         |          |          |

|                 |          |          |        |          |         |
|-----------------|----------|----------|--------|----------|---------|
| Cereals         | 89.55    | 151.87   | 14.81  | 63.18    | 0       |
| Fiber           | 43.47    | 81.44    | 8.7    | 13.97    | 0       |
| Fruit           | 1.97     | 4.04     | 0.46   | 2.7      | 0       |
| Livestock       | 112.5    | 157.22   | 12.63  | 22.25    | 0       |
| Oil crops       | 115.75   | 183.91   | 16.81  | 41.15    | 0       |
| Pulses          | 33.93    | 59.53    | 5.97   | 18.91    | 0       |
| Roots & tubers  | 27.34    | 52.17    | 5.65   | 15.46    | 0       |
| Sugar crops     | 1.14     | 2.13     | 0.23   | 0.39     | 0       |
| Vegetables      | 1.5      | 2.38     | 0.21   | 0.95     | 0       |
| <b>Chile</b>    |          |          |        |          |         |
| Cereals         | 4.43     | 72.46    | 74.03  | 150.83   | 530.04  |
| Fiber           | 0        | 0        | 0      | 0        | 0       |
| Fruit           | 1.9      | 30.78    | 30.76  | 59.62    | 213.27  |
| Livestock       | 6.98     | 144.57   | 203.47 | 661.59   | 2003.5  |
| Oil crops       | 0.82     | 13.3     | 13.38  | 26.2     | 91.85   |
| Pulses          | 0.38     | 5.88     | 5.46   | 8.39     | 28.78   |
| Roots & tubers  | 0.4      | 6.77     | 7.44   | 18.12    | 69.51   |
| Sugar crops     | 1.49     | 24.14    | 24.28  | 47.55    | 166.69  |
| Vegetables      | 0.99     | 16.03    | 16.12  | 31.57    | 110.7   |
| <b>China</b>    |          |          |        |          |         |
| Cereals         | 56900.2  | 28457.28 | 0      | 10728.29 | 0       |
| Fiber           | 8851.42  | 6376.87  | 0      | 4855.71  | 0       |
| Fruit           | 2043.07  | 884.56   | 0      | 477.12   | 0       |
| Livestock       | 38023.53 | 17124.77 | 0      | 7018.04  | 0       |
| Oil crops       | 41081.43 | 24420.54 | 0      | 14306.24 | 0       |
| Pulses          | 1364.74  | 673.42   | 0      | 470.26   | 0       |
| Roots & tubers  | 17964.06 | 5267.84  | 0      | 1738.33  | 0       |
| Sugar crops     | 896.51   | 790.83   | 0      | 293.44   | 0       |
| Vegetables      | 4274.95  | 2002.14  | 0      | 849.49   | 0       |
| <b>Colombia</b> |          |          |        |          |         |
| Cereals         | 1.51     | 31.75    | 45.16  | 149.76   | 473.21  |
| Fiber           | 0.99     | 15.83    | 15.37  | 25.59    | 66.44   |
| Fruit           | 1.4      | 22.98    | 23.58  | 46.63    | 138.23  |
| Livestock       | 56.71    | 906.57   | 885.13 | 1558.61  | 4859.03 |
| Oil crops       | 0.84     | 13.58    | 13.45  | 28.57    | 140.29  |
| Pulses          | 1.4      | 23.13    | 23.98  | 46.17    | 105.33  |
| Roots & tubers  | 3.4      | 54.72    | 54.28  | 96.84    | 264.73  |
| Sugar crops     | 2.84     | 45.98    | 46.26  | 83.14    | 197.05  |
| Vegetables      | 0.91     | 14.48    | 14.09  | 23.63    | 61.15   |
| <b>Congo</b>    |          |          |        |          |         |
| Cereals         | 0.58     | 0.81     | 0.06   | 0.01     | 0       |
| Fiber           | 0        | 0        | 0      | 0        | 0       |
| Fruit           | 1.17     | 3.05     | 0.4    | 0.27     | 0       |
| Livestock       | 0.83     | 1.59     | 0.17   | 0.64     | 0       |
| Oil crops       | 1.05     | 1.73     | 0.16   | 0.25     | 0       |
| Pulses          | 2.08     | 3.55     | 0.34   | 0.61     | 0       |

|                       |        |        |        |        |        |
|-----------------------|--------|--------|--------|--------|--------|
| Roots & tubers        | 47.43  | 87.84  | 9.09   | 3.43   | 0      |
| Sugar crops           | 1.93   | 3.02   | 0.27   | 0.47   | 0      |
| Vegetables            | 0.15   | 0.23   | 0.02   | 0.02   | 0      |
| <b>Costa Rica</b>     |        |        |        |        |        |
| Cereals               | 0.07   | 3.67   | 13.86  | 13.03  | 22.09  |
| Fiber                 | 0      | 0.05   | 0.18   | 0.17   | 0.29   |
| Fruit                 | 0.38   | 21.39  | 80.92  | 76     | 128.69 |
| Livestock             | 4.18   | 85.93  | 292.19 | 244.04 | 392.07 |
| Oil crops             | 0      | 0.23   | 0.88   | 0.82   | 1.38   |
| Pulses                | 0.01   | 0.85   | 3.27   | 3.12   | 5.31   |
| Roots & tubers        | 0.02   | 1.6    | 6.13   | 5.73   | 9.49   |
| Sugar crops           | 0.05   | 3.06   | 11.58  | 10.88  | 18.42  |
| Vegetables            | 0.01   | 0.87   | 3.31   | 3.15   | 5.35   |
| <b>Croatia</b>        |        |        |        |        |        |
| Cereals               | 37.16  | 135.27 | 53.61  | 155.48 | 54.29  |
| Fiber                 | 0      | 0      | 0      | 0      | 0      |
| Fruit                 | 2.33   | 7.87   | 2.65   | 6.86   | 2.35   |
| Livestock             | 52.56  | 226.29 | 113.04 | 471.05 | 206.13 |
| Oil crops             | 47.64  | 165.9  | 60.33  | 168.38 | 58.79  |
| Pulses                | 0.49   | 1.76   | 0.69   | 1.98   | 0.69   |
| Roots & tubers        | 2.49   | 8.62   | 3.07   | 8.29   | 2.86   |
| Sugar crops           | 16.17  | 58.08  | 22.43  | 64.62  | 22.7   |
| Vegetables            | 0.73   | 2.65   | 1.03   | 2.96   | 1.03   |
| <b>Cuba</b>           |        |        |        |        |        |
| Cereals               | 13.99  | 31.65  | 30.21  | 21.98  | 34.32  |
| Fiber                 | 0      | 0      | 0      | 0      | 0      |
| Fruit                 | 9.48   | 21.5   | 20.74  | 20.68  | 45.64  |
| Livestock             | 48.36  | 125.31 | 159.95 | 104.26 | 131.81 |
| Oil crops             | 0.88   | 1.99   | 1.9    | 1.38   | 2.16   |
| Pulses                | 12.29  | 27.79  | 26.53  | 19.3   | 30.14  |
| Roots & tubers        | 20.93  | 47.31  | 45.1   | 32.83  | 51.3   |
| Sugar crops           | 12.2   | 27.59  | 26.34  | 19.16  | 29.92  |
| Vegetables            | 9.17   | 20.74  | 19.8   | 14.4   | 22.49  |
| <b>Cyprus</b>         |        |        |        |        |        |
| Cereals               | 0      | 0      | 0      | 0      | 0      |
| Fiber                 | 0      | 0      | 0      | 0      | 0      |
| Fruit                 | 0.03   | 0.13   | 0.05   | 0.02   | 0      |
| Livestock             | 30.6   | 141.55 | 52.5   | 25.47  | 4.51   |
| Oil crops             | 0      | 0.01   | 0      | 0      | 0      |
| Pulses                | 0      | 0.01   | 0      | 0      | 0      |
| Roots & tubers        | 0      | 0      | 0      | 0      | 0      |
| Sugar crops           | 0      | 0      | 0      | 0      | 0      |
| Vegetables            | 0      | 0      | 0      | 0      | 0      |
| <b>Czech Republic</b> |        |        |        |        |        |
| Cereals               | 165.81 | 619.37 | 261.7  | 799.85 | 281.5  |
| Fiber                 | 0      | 0      | 0      | 0      | 0      |

|                                         |        |         |        |         |        |
|-----------------------------------------|--------|---------|--------|---------|--------|
| Fruit                                   | 1.36   | 5.12    | 2.09   | 4.4     | 1      |
| Livestock                               | 233.81 | 925.97  | 413.6  | 1361.61 | 519.69 |
| Oil crops                               | 186.22 | 711.93  | 313.77 | 991.33  | 353.51 |
| Pulses                                  | 2.79   | 9.75    | 3.59   | 9.39    | 3.01   |
| Roots & tubers                          | 3.56   | 17.82   | 11.25  | 33.57   | 9.56   |
| Sugar crops                             | 37.51  | 128.18  | 44.58  | 131.42  | 49.42  |
| Vegetables                              | 1.26   | 4.4     | 1.63   | 4.23    | 1.35   |
| <b>Democratic Republic of the Congo</b> |        |         |        |         |        |
| Cereals                                 | 46.49  | 75.6    | 6.96   | 19.73   | 0      |
| Fiber                                   | 8.83   | 16.47   | 1.75   | 4.78    | 0      |
| Fruit                                   | 29.03  | 50.46   | 4.98   | 15.29   | 0      |
| Livestock                               | 5.39   | 10.5    | 1.12   | 0.86    | 0      |
| Oil crops                               | 28.13  | 48.12   | 4.66   | 10.3    | 0      |
| Pulses                                  | 45.7   | 74.74   | 6.81   | 17.4    | 0      |
| Roots & tubers                          | 582.46 | 1092.69 | 115.39 | 295.36  | 0      |
| Sugar crops                             | 4.34   | 7.96    | 0.83   | 2.57    | 0      |
| Vegetables                              | 4.34   | 7.94    | 0.83   | 2.57    | 0      |
| <b>Denmark</b>                          |        |         |        |         |        |
| Cereals                                 | 65.04  | 541.01  | 418.64 | 1408.72 | 489.6  |
| Fiber                                   | 0      | 0       | 0      | 0       | 0      |
| Fruit                                   | 0.04   | 0.33    | 0.26   | 0.86    | 0.3    |
| Livestock                               | 157.7  | 1267.42 | 958.63 | 2633.05 | 723.94 |
| Oil crops                               | 28.2   | 234.47  | 181.41 | 606.95  | 209.77 |
| Pulses                                  | 0.27   | 2.28    | 1.77   | 5.96    | 2.07   |
| Roots & tubers                          | 3.02   | 25.25   | 19.59  | 66.06   | 22.97  |
| Sugar crops                             | 6.71   | 55.79   | 43.18  | 145.09  | 50.34  |
| Vegetables                              | 0.29   | 2.38    | 1.85   | 6.22    | 2.16   |
| <b>Djibouti</b>                         |        |         |        |         |        |
| Cereals                                 | 0      | 0       | 0      | 0       | 0      |
| Fiber                                   | 0      | 0       | 0      | 0       | 0      |
| Fruit                                   | 0      | 0       | 0      | 0       | 0      |
| Livestock                               | 0      | 0       | 0      | 0       | 0      |
| Oil crops                               | 0      | 0       | 0      | 0       | 0      |
| Pulses                                  | 0      | 0       | 0      | 0       | 0      |
| Roots & tubers                          | 0      | 0       | 0      | 0       | 0      |
| Sugar crops                             | 0      | 0       | 0      | 0       | 0      |
| Vegetables                              | 0      | 0       | 0      | 0       | 0      |
| <b>Dominica</b>                         |        |         |        |         |        |
| Cereals                                 | 0      | 0       | 0      | 0       | 0      |
| Fiber                                   | 0      | 0       | 0      | 0       | 0      |
| Fruit                                   | 0.03   | 0.42    | 1.29   | 0.82    | 0.96   |
| Livestock                               | 0.08   | 0.91    | 2.7    | 1.61    | 1.71   |
| Oil crops                               | 0.01   | 0.08    | 0.26   | 0.17    | 0.19   |
| Pulses                                  | 0      | 0       | 0      | 0       | 0      |
| Roots & tubers                          | 0.02   | 0.24    | 0.71   | 0.44    | 0.49   |

|                          |        |         |         |         |         |
|--------------------------|--------|---------|---------|---------|---------|
| Sugar crops              | 0      | 0.01    | 0.02    | 0.01    | 0.01    |
| Vegetables               | 0      | 0       | 0.01    | 0.01    | 0.01    |
| <b>Ecuador</b>           |        |         |         |         |         |
| Cereals                  | 6.02   | 93.73   | 87.06   | 117.24  | 185.94  |
| Fiber                    | 0.03   | 0.44    | 0.45    | 0.85    | 1.72    |
| Fruit                    | 3.45   | 52.49   | 46.55   | 52.24   | 79.18   |
| Livestock                | 56.7   | 892.91  | 846.68  | 1277.74 | 2790.97 |
| Oil crops                | 0.21   | 4.86    | 7.51    | 27.2    | 89.04   |
| Pulses                   | 0.27   | 4.15    | 3.9     | 5.49    | 9.51    |
| Roots & tubers           | 0.29   | 4.77    | 5.04    | 10.05   | 22.02   |
| Sugar crops              | 0.57   | 9.11    | 9       | 15.7    | 40.03   |
| Vegetables               | 0.09   | 1.34    | 1.22    | 1.49    | 2.06    |
| <b>Egypt</b>             |        |         |         |         |         |
| Cereals                  | 590.67 | 2732.37 | 1013.49 | 491.63  | 87.15   |
| Fiber                    | 70.9   | 327.98  | 121.65  | 59.01   | 10.46   |
| Fruit                    | 184.98 | 855.67  | 317.39  | 153.96  | 27.29   |
| Livestock                | 793.64 | 3671.28 | 1361.75 | 660.56  | 117.09  |
| Oil crops                | 97.12  | 449.25  | 166.64  | 80.83   | 14.33   |
| Pulses                   | 8.65   | 40      | 14.84   | 7.2     | 1.28    |
| Roots & tubers           | 38.92  | 180.06  | 66.79   | 32.4    | 5.74    |
| Sugar crops              | 83.16  | 384.67  | 142.68  | 69.21   | 12.27   |
| Vegetables               | 122.86 | 568.33  | 210.8   | 102.26  | 18.13   |
| <b>El Salvador</b>       |        |         |         |         |         |
| Cereals                  | 7.86   | 19.33   | 20.74   | 8.75    | 3.82    |
| Fiber                    | 0.24   | 0.54    | 0.47    | 0.2     | 0.09    |
| Fruit                    | 3.16   | 7.05    | 6.04    | 2.55    | 1.11    |
| Livestock                | 118.44 | 237.84  | 141.06  | 59.54   | 25.98   |
| Oil crops                | 7.08   | 15.18   | 11.53   | 4.87    | 2.12    |
| Pulses                   | 4.93   | 21.58   | 43.35   | 18.3    | 7.98    |
| Roots & tubers           | 0.6    | 1.22    | 0.78    | 0.33    | 0.14    |
| Sugar crops              | 9.77   | 19.51   | 11.32   | 4.78    | 2.08    |
| Vegetables               | 0.61   | 1.27    | 0.88    | 0.37    | 0.16    |
| <b>Equatorial Guinea</b> |        |         |         |         |         |
| Cereals                  | 0      | 0       | 0       | 0       | 0       |
| Fiber                    | 0      | 0       | 0       | 0       | 0       |
| Fruit                    | 0.68   | 0.82    | 0.04    | 0       | 0       |
| Livestock                | 0.11   | 0.13    | 0.01    | 0       | 0       |
| Oil crops                | 0.22   | 0.26    | 0.01    | 0       | 0       |
| Pulses                   | 0      | 0       | 0       | 0       | 0       |
| Roots & tubers           | 10.18  | 12.24   | 0.6     | 0       | 0       |
| Sugar crops              | 0      | 0       | 0       | 0       | 0       |
| Vegetables               | 0      | 0       | 0       | 0       | 0       |
| <b>Eritrea</b>           |        |         |         |         |         |
| Cereals                  | 21.05  | 40.68   | 4.35    | 0.02    | 0       |
| Fiber                    | 0      | 0       | 0       | 0       | 0       |
| Fruit                    | 0      | 0       | 0       | 0       | 0       |



|                 |         |          |         |          |         |
|-----------------|---------|----------|---------|----------|---------|
| Livestock       | 48.66   | 87.51    | 8.96    | 0.04     | 0       |
| Oil crops       | 29.95   | 74.09    | 9.45    | 0.05     | 0       |
| Pulses          | 2.04    | 5.06     | 0.65    | 0        | 0       |
| Roots & tubers  | 0.24    | 0.6      | 0.08    | 0        | 0       |
| Sugar crops     | 0       | 0        | 0       | 0        | 0       |
| Vegetables      | 0       | 0        | 0       | 0        | 0       |
| <b>Estonia</b>  |         |          |         |          |         |
| Cereals         | 3.29    | 30.18    | 24.77   | 135.11   | 63.99   |
| Fiber           | 0       | 0        | 0       | 0        | 0       |
| Fruit           | 0       | 0.03     | 0.03    | 0.17     | 0.08    |
| Livestock       | 8.1     | 109.29   | 105.85  | 437.69   | 166.52  |
| Oil crops       | 3.29    | 30.73    | 25.49   | 147.27   | 71.4    |
| Pulses          | 0.03    | 0.29     | 0.24    | 1.38     | 0.67    |
| Roots & tubers  | 0.2     | 1.89     | 1.56    | 8.77     | 4.21    |
| Sugar crops     | 0       | 0        | 0       | 0        | 0       |
| Vegetables      | 0.01    | 0.11     | 0.09    | 0.5      | 0.24    |
| <b>Ethiopia</b> |         |          |         |          |         |
| Cereals         | 768.96  | 1530.21  | 170.12  | 188.72   | 0       |
| Fiber           | 24.68   | 46.54    | 4.93    | 8.34     | 0       |
| Fruit           | 6.4     | 12.05    | 1.28    | 2.16     | 0       |
| Livestock       | 1080.33 | 1787.45  | 168.35  | 2.31     | 0       |
| Oil crops       | 437.29  | 788.83   | 80.45   | 129.99   | 0       |
| Pulses          | 131.91  | 174.33   | 11.51   | 7.57     | 0       |
| Roots & tubers  | 50.21   | 94.52    | 10.01   | 16.89    | 0       |
| Sugar crops     | 7.4     | 13.95    | 1.48    | 2.5      | 0       |
| Vegetables      | 12.69   | 23.92    | 2.54    | 4.29     | 0       |
| <b>Finland</b>  |         |          |         |          |         |
| Cereals         | 45.25   | 354.88   | 275.81  | 703.19   | 157.62  |
| Fiber           | 0       | 0        | 0       | 0        | 0       |
| Fruit           | 0.01    | 0.04     | 0.03    | 0.09     | 0.02    |
| Livestock       | 147.03  | 793.88   | 495.59  | 1209.59  | 273.8   |
| Oil crops       | 10.12   | 78.58    | 60.72   | 154.82   | 34.9    |
| Pulses          | 0.1     | 0.79     | 0.61    | 1.55     | 0.35    |
| Roots & tubers  | 1.72    | 13.67    | 10.72   | 27.97    | 6.51    |
| Sugar crops     | 3.44    | 26.7     | 20.63   | 52.61    | 11.86   |
| Vegetables      | 0.23    | 1.79     | 1.39    | 3.53     | 0.8     |
| <b>France</b>   |         |          |         |          |         |
| Cereals         | 494.87  | 2743.44  | 1834.99 | 7875.87  | 3246.85 |
| Fiber           | 0       | 0        | 0       | 0        | 0       |
| Fruit           | 41.68   | 215.31   | 121.85  | 290.46   | 74.29   |
| Livestock       | 2942.28 | 10999.81 | 4586.42 | 10378.36 | 2499.82 |
| Oil crops       | 418.22  | 2094.41  | 1303.45 | 6510.16  | 2953.52 |
| Pulses          | 20.67   | 92.4     | 49.37   | 158.13   | 54.63   |
| Roots & tubers  | 5.95    | 79.84    | 79.43   | 321.64   | 117.66  |
| Sugar crops     | 18.97   | 323.19   | 346.14  | 2158.11  | 1024.15 |
| Vegetables      | 6.16    | 27.67    | 14.81   | 46.97    | 16.11   |

|                |         |         |         |          |         |
|----------------|---------|---------|---------|----------|---------|
| <b>Gabon</b>   |         |         |         |          |         |
| Cereals        | 0.78    | 1.02    | 0.07    | 0        | 0       |
| Fiber          | 0       | 0       | 0       | 0        | 0       |
| Fruit          | 2.32    | 3.22    | 0.25    | 0        | 0       |
| Livestock      | 1.49    | 3.08    | 0.36    | 0        | 0       |
| Oil crops      | 2.45    | 3.19    | 0.23    | 0        | 0       |
| Pulses         | 0.04    | 0.05    | 0       | 0        | 0       |
| Roots & tubers | 23.51   | 31.54   | 2.41    | 0.01     | 0       |
| Sugar crops    | 0.84    | 1.21    | 0.1     | 0        | 0       |
| Vegetables     | 0.01    | 0.02    | 0       | 0        | 0       |
| <b>Gambia</b>  |         |         |         |          |         |
| Cereals        | 6.94    | 11.67   | 1.13    | 0        | 0       |
| Fiber          | 0.19    | 0.3     | 0.03    | 0        | 0       |
| Fruit          | 0       | 0       | 0       | 0        | 0       |
| Livestock      | 2.91    | 7.46    | 0.98    | 0.01     | 0       |
| Oil crops      | 9.03    | 15.02   | 1.45    | 0.01     | 0       |
| Pulses         | 0.36    | 0.58    | 0.05    | 0        | 0       |
| Roots & tubers | 0.48    | 0.69    | 0.06    | 0        | 0       |
| Sugar crops    | 0       | 0       | 0       | 0        | 0       |
| Vegetables     | 0       | 0       | 0       | 0        | 0       |
| <b>Georgia</b> |         |         |         |          |         |
| Cereals        | 7.26    | 38.3    | 14.2    | 7.32     | 1.26    |
| Fiber          | 0       | 0       | 0       | 0        | 0       |
| Fruit          | 2.22    | 14.28   | 5.76    | 2.98     | 0.52    |
| Livestock      | 95.15   | 480.76  | 173.6   | 89.8     | 15.42   |
| Oil crops      | 2.46    | 12.91   | 4.77    | 2.46     | 0.42    |
| Pulses         | 1.88    | 9.78    | 3.61    | 1.86     | 0.32    |
| Roots & tubers | 2.58    | 13.94   | 5.22    | 2.7      | 0.46    |
| Sugar crops    | 0       | 0       | 0       | 0        | 0       |
| Vegetables     | 1.51    | 8.03    | 2.99    | 1.54     | 0.27    |
| <b>Germany</b> |         |         |         |          |         |
| Cereals        | 477.12  | 2614.56 | 1647.66 | 5750.04  | 2110.09 |
| Fiber          | 0       | 0       | 0       | 0        | 0       |
| Fruit          | 26.59   | 83.63   | 22.55   | 39.52    | 10.45   |
| Livestock      | 1034.52 | 6184.28 | 4181.46 | 16670.74 | 6679.56 |
| Oil crops      | 507.67  | 2699.02 | 1697.14 | 6848.88  | 2779.98 |
| Pulses         | 5.32    | 24.08   | 12.76   | 43.66    | 16.38   |
| Roots & tubers | 31.74   | 189.78  | 126.34  | 470.03   | 181.07  |
| Sugar crops    | 79.77   | 632.17  | 473.4   | 1342.98  | 390.28  |
| Vegetables     | 4.58    | 20.17   | 10.27   | 32.85    | 11.83   |
| <b>Ghana</b>   |         |         |         |          |         |
| Cereals        | 64.68   | 95.99   | 7.78    | 0.03     | 0       |
| Fiber          | 6.81    | 12.31   | 1.27    | 0.01     | 0       |
| Fruit          | 84.62   | 115.95  | 8.45    | 0.02     | 0       |
| Livestock      | 27.33   | 36.3    | 2.47    | 0.01     | 0       |
| Oil crops      | 7.63    | 13.88   | 1.44    | 0.01     | 0       |

|                      |        |         |        |        |        |
|----------------------|--------|---------|--------|--------|--------|
| Pulses               | 82.8   | 99.9    | 4.97   | 0      | 0      |
| Roots & tubers       | 784.39 | 1086.69 | 81.44  | 0.21   | 0      |
| Sugar crops          | 0.62   | 0.75    | 0.05   | 0      | 0      |
| Vegetables           | 9.15   | 15.27   | 1.46   | 0.01   | 0      |
| <b>Greece</b>        |        |         |        |        |        |
| Cereals              | 92.23  | 370.5   | 161.83 | 265.69 | 26.82  |
| Fiber                | 107.81 | 430.02  | 191.68 | 335.98 | 38.6   |
| Fruit                | 41.87  | 159.36  | 63.96  | 100.53 | 9.87   |
| Livestock            | 396.42 | 1401.49 | 494.94 | 734.82 | 72.15  |
| Oil crops            | 193.88 | 750.47  | 303.68 | 460.96 | 40.79  |
| Pulses               | 3.09   | 11.35   | 4.23   | 6.21   | 0.55   |
| Roots & tubers       | 7.54   | 31.18   | 14.41  | 25.01  | 2.74   |
| Sugar crops          | 23.8   | 91.22   | 37.42  | 60.74  | 6.31   |
| Vegetables           | 20.61  | 77.01   | 30.16  | 47.48  | 4.8    |
| <b>Grenada</b>       |        |         |        |        |        |
| Cereals              | 0      | 0       | 0      | 0      | 0      |
| Fiber                | 0      | 0       | 0      | 0      | 0      |
| Fruit                | 0      | 0       | 0      | 0      | 0      |
| Livestock            | 0      | 0       | 0      | 0      | 0      |
| Oil crops            | 0      | 0       | 0      | 0      | 0      |
| Pulses               | 0      | 0       | 0      | 0      | 0      |
| Roots & tubers       | 0      | 0       | 0      | 0      | 0      |
| Sugar crops          | 0      | 0       | 0      | 0      | 0      |
| Vegetables           | 0      | 0       | 0      | 0      | 0      |
| <b>Guatemala</b>     |        |         |        |        |        |
| Cereals              | 3.96   | 13.02   | 22.97  | 15.04  | 18.11  |
| Fiber                | 0.21   | 0.77    | 1.45   | 0.84   | 0.85   |
| Fruit                | 5.83   | 21.26   | 39.95  | 23.21  | 23.83  |
| Livestock            | 44.46  | 134.79  | 210.47 | 119.61 | 118.66 |
| Oil crops            | 24.32  | 89.25   | 168.33 | 96.97  | 98.28  |
| Pulses               | 10.32  | 31.93   | 52.55  | 33.65  | 39.46  |
| Roots & tubers       | 2.13   | 7.79    | 14.66  | 8.47   | 8.62   |
| Sugar crops          | 9.4    | 34.7    | 65.77  | 37.98  | 38.65  |
| Vegetables           | 2.72   | 9.78    | 18.24  | 10.73  | 11.24  |
| <b>Guinea</b>        |        |         |        |        |        |
| Cereals              | 147.46 | 255.07  | 25.44  | 0.1    | 0      |
| Fiber                | 13.3   | 27.1    | 3.08   | 0.01   | 0      |
| Fruit                | 6.48   | 13.27   | 1.51   | 0.01   | 0      |
| Livestock            | 51.6   | 88.79   | 8.77   | 0.03   | 0      |
| Oil crops            | 3.02   | 4.34    | 0.36   | 0      | 0      |
| Pulses               | 3.72   | 12.52   | 1.82   | 0.01   | 0      |
| Roots & tubers       | 61.93  | 116.28  | 12.43  | 0.05   | 0      |
| Sugar crops          | 0.89   | 1.73    | 0.19   | 0      | 0      |
| Vegetables           | 0      | 0       | 0      | 0      | 0      |
| <b>Guinea-Bissau</b> |        |         |        |        |        |
| Cereals              | 17.08  | 20.67   | 1.2    | 0      | 0      |

|                 |        |        |        |        |        |
|-----------------|--------|--------|--------|--------|--------|
| Fiber           | 2.33   | 2.82   | 0.17   | 0      | 0      |
| Fruit           | 1.38   | 1.67   | 0.1    | 0      | 0      |
| Livestock       | 12.46  | 15.09  | 0.9    | 0      | 0      |
| Oil crops       | 1.45   | 1.76   | 0.1    | 0      | 0      |
| Pulses          | 0.31   | 0.38   | 0.02   | 0      | 0      |
| Roots & tubers  | 2.45   | 2.97   | 0.17   | 0      | 0      |
| Sugar crops     | 0.02   | 0.03   | 0      | 0      | 0      |
| Vegetables      | 0      | 0      | 0      | 0      | 0      |
| <b>Guyana</b>   |        |        |        |        |        |
| Cereals         | 0.02   | 1.28   | 2.77   | 16.87  | 105.09 |
| Fiber           | 0      | 0      | 0      | 0      | 0      |
| Fruit           | 0      | 0.06   | 0.1    | 0.41   | 1.6    |
| Livestock       | 0.06   | 1.55   | 2.51   | 9.63   | 32.57  |
| Oil crops       | 0.01   | 0.22   | 0.35   | 1.29   | 4.05   |
| Pulses          | 0      | 0      | 0.01   | 0.03   | 0.12   |
| Roots & tubers  | 0      | 0.08   | 0.14   | 0.61   | 2.54   |
| Sugar crops     | 0.03   | 0.71   | 1.23   | 5.35   | 22.94  |
| Vegetables      | 0      | 0.01   | 0.01   | 0.04   | 0.15   |
| <b>Haiti</b>    |        |        |        |        |        |
| Cereals         | 8.68   | 19.66  | 17.51  | 7.39   | 3.22   |
| Fiber           | 0.22   | 0.5    | 0.44   | 0.19   | 0.08   |
| Fruit           | 3.82   | 8.65   | 7.7    | 3.25   | 1.42   |
| Livestock       | 20.01  | 41.65  | 28.53  | 12.04  | 5.25   |
| Oil crops       | 6.67   | 15.07  | 13.32  | 5.62   | 2.45   |
| Pulses          | 9.8    | 22.16  | 19.65  | 8.3    | 3.62   |
| Roots & tubers  | 20.81  | 47     | 41.52  | 17.53  | 7.65   |
| Sugar crops     | 1.64   | 3.73   | 3.35   | 1.41   | 0.62   |
| Vegetables      | 0.26   | 0.6    | 0.55   | 0.23   | 0.1    |
| <b>Honduras</b> |        |        |        |        |        |
| Cereals         | 3.88   | 7.98   | 5.59   | 6.99   | 18.12  |
| Fiber           | 0.18   | 0.37   | 0.28   | 0.31   | 0.76   |
| Fruit           | 10.84  | 22.74  | 16.92  | 18.56  | 45.21  |
| Livestock       | 122.72 | 247.89 | 159.9  | 130.28 | 245.75 |
| Oil crops       | 1.44   | 2.98   | 2.14   | 2.45   | 6.09   |
| Pulses          | 4.92   | 10.87  | 9.81   | 16.71  | 48.94  |
| Roots & tubers  | 0.71   | 1.45   | 0.96   | 0.93   | 2.12   |
| Sugar crops     | 4.98   | 10.5   | 8.01   | 9.61   | 24.5   |
| Vegetables      | 1.78   | 3.72   | 2.71   | 2.95   | 7.14   |
| <b>Hungary</b>  |        |        |        |        |        |
| Cereals         | 187.33 | 728.22 | 307.49 | 825.31 | 272.63 |
| Fiber           | 0      | 0      | 0      | 0      | 0      |
| Fruit           | 4.62   | 19.88  | 9.6    | 27.67  | 9.41   |
| Livestock       | 177.54 | 744.47 | 343.84 | 869.32 | 262.22 |
| Oil crops       | 109.5  | 456.86 | 215.51 | 668.48 | 241.99 |
| Pulses          | 1.19   | 5.68   | 3.07   | 8.34   | 2.55   |
| Roots & tubers  | 5.05   | 18.52  | 7.07   | 17.38  | 5.51   |

|                                   |          |          |         |         |       |
|-----------------------------------|----------|----------|---------|---------|-------|
| Sugar crops                       | 32.69    | 117.51   | 43.97   | 95.52   | 25    |
| Vegetables                        | 4.33     | 14.27    | 4.37    | 10.13   | 3.4   |
| <b>Iceland</b>                    |          |          |         |         |       |
| Cereals                           | 0        | 0        | 0       | 0       | 0     |
| Fiber                             | 0        | 0        | 0       | 0       | 0     |
| Fruit                             | 0        | 0        | 0       | 0       | 0     |
| Livestock                         | 0        | 0        | 0       | 0       | 0     |
| Oil crops                         | 0        | 0        | 0       | 0       | 0     |
| Pulses                            | 0        | 0        | 0       | 0       | 0     |
| Roots & tubers                    | 0        | 0        | 0       | 0       | 0     |
| Sugar crops                       | 0        | 0        | 0       | 0       | 0     |
| Vegetables                        | 0        | 0        | 0       | 0       | 0     |
| <b>India</b>                      |          |          |         |         |       |
| Cereals                           | 20448.54 | 40417.96 | 4800.5  | 906.65  | 0     |
| Fiber                             | 2673.59  | 7896.64  | 1090.85 | 206.14  | 0     |
| Fruit                             | 579.08   | 1321.1   | 165.99  | 31.75   | 0     |
| Livestock                         | 34387.37 | 78076.96 | 9788.19 | 1872.97 | 0     |
| Oil crops                         | 15254.13 | 34744.01 | 4355.04 | 835.16  | 0     |
| Pulses                            | 1199.32  | 2995.35  | 388.17  | 74.65   | 0     |
| Roots & tubers                    | 1297.99  | 2288.6   | 255.58  | 48.23   | 0     |
| Sugar crops                       | 714.64   | 1896.16  | 253.98  | 47.85   | 0     |
| Vegetables                        | 1094.43  | 1889.83  | 204.94  | 39.79   | 0     |
| <b>Indonesia</b>                  |          |          |         |         |       |
| Cereals                           | 5359.8   | 7544.23  | 287.82  | 2855.68 | 0     |
| Fiber                             | 1.47     | 2.59     | 0.14    | 1.34    | 0     |
| Fruit                             | 257.87   | 453.96   | 24.07   | 234.88  | 0     |
| Livestock                         | 782.44   | 1066.82  | 35.38   | 127.28  | 0     |
| Oil crops                         | 1211.51  | 1644.02  | 56.63   | 406.37  | 0     |
| Pulses                            | 108.08   | 190.16   | 10.07   | 98.45   | 0     |
| Roots & tubers                    | 1182.86  | 1686.41  | 61.42   | 219.58  | 0     |
| Sugar crops                       | 74.13    | 130.43   | 6.91    | 67.53   | 0     |
| Vegetables                        | 58.14    | 102.29   | 5.42    | 52.96   | 0     |
| <b>Iran (Islamic Republic of)</b> |          |          |         |         |       |
| Cereals                           | 1684.78  | 3467.62  | 410.31  | 1351.16 | 0     |
| Fiber                             | 102.23   | 168.59   | 17.52   | 31.7    | 0     |
| Fruit                             | 408.4    | 914.19   | 112.51  | 298.85  | 0     |
| Livestock                         | 1681.41  | 5409.42  | 758.32  | 1816.85 | 0     |
| Oil crops                         | 197.72   | 1210.84  | 194.49  | 186.97  | 0     |
| Pulses                            | 66.42    | 149.28   | 18.46   | 53.93   | 0     |
| Roots & tubers                    | 83.7     | 168.28   | 19.61   | 120.65  | 0     |
| Sugar crops                       | 91.11    | 392.25   | 59.08   | 209.15  | 0     |
| Vegetables                        | 192.73   | 413.22   | 49.53   | 206.94  | 0     |
| <b>Iraq</b>                       |          |          |         |         |       |
| Cereals                           | 193.51   | 626.05   | 166.77  | 94.21   | 41.99 |
| Fiber                             | 3.32     | 15.38    | 5.7     | 2.77    | 0.49  |
| Fruit                             | 36.87    | 158.39   | 54.93   | 29.57   | 10.57 |

|                    |        |         |         |         |        |
|--------------------|--------|---------|---------|---------|--------|
| Livestock          | 45.95  | 219.98  | 77.64   | 53.05   | 37.15  |
| Oil crops          | 1.49   | 6.42    | 2.19    | 1.09    | 0.19   |
| Pulses             | 1.3    | 4.45    | 1.24    | 0.68    | 0.25   |
| Roots & tubers     | 6.38   | 33.09   | 11.96   | 8.45    | 6.12   |
| Sugar crops        | 0.1    | 0.84    | 0.36    | 0.19    | 0.03   |
| Vegetables         | 13.37  | 64.25   | 24.16   | 11.81   | 2.09   |
| <b>Ireland</b>     |        |         |         |         |        |
| Cereals            | 22.57  | 146.72  | 104.23  | 323.92  | 101.78 |
| Fiber              | 0      | 0       | 0       | 0       | 0      |
| Fruit              | 0.08   | 0.53    | 0.37    | 1.14    | 0.37   |
| Livestock          | 565.98 | 2381.01 | 1134.16 | 2148.7  | 319.58 |
| Oil crops          | 1.97   | 12.5    | 8.68    | 27.19   | 8.75   |
| Pulses             | 0.6    | 3.77    | 2.61    | 8.17    | 2.63   |
| Roots & tubers     | 1.18   | 7.54    | 5.25    | 16.46   | 5.29   |
| Sugar crops        | 3.16   | 31.14   | 26.57   | 84.77   | 26.23  |
| Vegetables         | 0.09   | 0.58    | 0.4     | 1.25    | 0.4    |
| <b>Israel</b>      |        |         |         |         |        |
| Cereals            | 12.09  | 73.52   | 29.28   | 15.03   | 2.62   |
| Fiber              | 10.59  | 55.69   | 21.17   | 10.68   | 1.86   |
| Fruit              | 24.62  | 111.1   | 39.43   | 19.57   | 3.41   |
| Livestock          | 353.91 | 1748.03 | 641.83  | 324.11  | 56.34  |
| Oil crops          | 7.82   | 38.76   | 14.44   | 7.22    | 1.26   |
| Pulses             | 0.05   | 0.23    | 0.08    | 0.04    | 0.01   |
| Roots & tubers     | 14.2   | 65.58   | 23.75   | 11.74   | 2.06   |
| Sugar crops        | 0      | 0       | 0       | 0       | 0      |
| Vegetables         | 14.6   | 65.96   | 23.53   | 11.64   | 2.04   |
| <b>Italy</b>       |        |         |         |         |        |
| Cereals            | 140.29 | 870.19  | 598.48  | 1842.96 | 580.37 |
| Fiber              | 0      | 0       | 0       | 0       | 0      |
| Fruit              | 61.93  | 357.2   | 230.23  | 708.9   | 231.36 |
| Livestock          | 699.41 | 4283.28 | 2893.16 | 6109.85 | 905.94 |
| Oil crops          | 242.37 | 1024.65 | 497.82  | 1632.86 | 608.59 |
| Pulses             | 1.6    | 8.7     | 5.38    | 13.88   | 3.61   |
| Roots & tubers     | 10.91  | 46.56   | 23.36   | 63.52   | 18.69  |
| Sugar crops        | 32.44  | 241.83  | 180.33  | 428.07  | 86.33  |
| Vegetables         | 32.76  | 178.27  | 110.38  | 288     | 75.82  |
| <b>Ivory Coast</b> |        |         |         |         |        |
| Cereals            | 0      | 0       | 0       | 0       | 0      |
| Fiber              | 0      | 0       | 0       | 0       | 0      |
| Fruit              | 0      | 0       | 0       | 0       | 0      |
| Livestock          | 7.28   | 37.46   | 6.13    | 3.57    | 0      |
| Oil crops          | 0      | 0       | 0       | 0       | 0      |
| Pulses             | 0      | 0       | 0       | 0       | 0      |
| Roots & tubers     | 0      | 0       | 0       | 0       | 0      |
| Sugar crops        | 0      | 0       | 0       | 0       | 0      |
| Vegetables         | 0      | 0       | 0       | 0       | 0      |

|                   |         |         |         |         |         |
|-------------------|---------|---------|---------|---------|---------|
| <b>Jamaica</b>    |         |         |         |         |         |
| Cereals           | 0.03    | 0.05    | 0       | 0       | 0       |
| Fiber             | 0       | 0       | 0       | 0       | 0       |
| Fruit             | 13.27   | 22.3    | 1.89    | 0.8     | 0.35    |
| Livestock         | 83.28   | 148.9   | 40.38   | 17.05   | 7.44    |
| Oil crops         | 7.4     | 12.44   | 1.05    | 0.44    | 0.19    |
| Pulses            | 0.2     | 0.33    | 0.03    | 0.01    | 0.01    |
| Roots & tubers    | 8.67    | 14.59   | 1.29    | 0.55    | 0.24    |
| Sugar crops       | 5.82    | 9.79    | 0.83    | 0.35    | 0.15    |
| Vegetables        | 0.68    | 1.14    | 0.1     | 0.04    | 0.02    |
| <b>Japan</b>      |         |         |         |         |         |
| Cereals           | 1215.03 | 1387.66 | 525.33  | 304.17  | 0       |
| Fiber             | 0       | 0       | 0       | 0       | 0       |
| Fruit             | 24.89   | 35.4    | 14.48   | 11.23   | 0       |
| Livestock         | 3290.24 | 3920.21 | 1469.51 | 2501.81 | 0       |
| Oil crops         | 195.36  | 253.61  | 100.92  | 81.58   | 0       |
| Pulses            | 33.83   | 48.11   | 19.68   | 15.26   | 0       |
| Roots & tubers    | 214.66  | 181.09  | 57.76   | 39.54   | 0       |
| Sugar crops       | 156.64  | 213.83  | 86.36   | 66.67   | 0       |
| Vegetables        | 89.81   | 127.71  | 52.24   | 40.51   | 0       |
| <b>Jordan</b>     |         |         |         |         |         |
| Cereals           | 2.08    | 9.63    | 3.57    | 1.73    | 0.31    |
| Fiber             | 0       | 0       | 0       | 0       | 0       |
| Fruit             | 2.57    | 11.88   | 4.41    | 2.14    | 0.38    |
| Livestock         | 52.87   | 244.59  | 90.72   | 44.01   | 7.8     |
| Oil crops         | 10.91   | 50.47   | 18.72   | 9.08    | 1.61    |
| Pulses            | 0       | 0       | 0       | 0       | 0       |
| Roots & tubers    | 1.55    | 7.16    | 2.66    | 1.29    | 0.23    |
| Sugar crops       | 0       | 0       | 0       | 0       | 0       |
| Vegetables        | 6.65    | 30.78   | 11.42   | 5.54    | 0.98    |
| <b>Kazakhstan</b> |         |         |         |         |         |
| Cereals           | 76.12   | 1350.4  | 637.51  | 1277.43 | 2203.12 |
| Fiber             | 21.53   | 163.53  | 69.41   | 81.65   | 111.24  |
| Fruit             | 1.07    | 5.96    | 2.35    | 1.33    | 0.55    |
| Livestock         | 364.6   | 2545.94 | 1061.99 | 969.9   | 1068.08 |
| Oil crops         | 15.26   | 178.5   | 80.98   | 102.02  | 142.61  |
| Pulses            | 0.42    | 4.74    | 2.14    | 3.27    | 5.1     |
| Roots & tubers    | 8.48    | 81.52   | 36.02   | 40.42   | 52.47   |
| Sugar crops       | 1.17    | 18.67   | 8.74    | 6.33    | 4.48    |
| Vegetables        | 8.4     | 54.33   | 22.27   | 16.33   | 13.37   |
| <b>Kenya</b>      |         |         |         |         |         |
| Cereals           | 75.1    | 157.6   | 18.21   | 66.82   | 0       |
| Fiber             | 5.1     | 11      | 1.29    | 5.1     | 0       |
| Fruit             | 18.48   | 40.48   | 4.81    | 17.67   | 0       |
| Livestock         | 1084.16 | 2279.47 | 264.94  | 941.51  | 0       |
| Oil crops         | 26.5    | 55.12   | 6.33    | 25.46   | 0       |

|                                         |        |        |        |        |        |
|-----------------------------------------|--------|--------|--------|--------|--------|
| Pulses                                  | 148.1  | 294.84 | 32.86  | 97.67  | 0      |
| Roots & tubers                          | 101.25 | 219.23 | 25.81  | 94.01  | 0      |
| Sugar crops                             | 11.37  | 24.61  | 2.9    | 10.91  | 0      |
| Vegetables                              | 15.79  | 34.2   | 4.03   | 15.18  | 0      |
| <b>Kuwait</b>                           |        |        |        |        |        |
| Cereals                                 | 0      | 0.48   | 0.24   | 0.14   | 0.02   |
| Fiber                                   | 0      | 0      | 0      | 0      | 0      |
| Fruit                                   | 0      | 5.1    | 2.59   | 1.45   | 0.25   |
| Livestock                               | 0      | 42.03  | 21.34  | 11.95  | 2.04   |
| Oil crops                               | 0      | 0.02   | 0.01   | 0      | 0      |
| Pulses                                  | 0      | 0      | 0      | 0      | 0      |
| Roots & tubers                          | 0      | 1.06   | 0.54   | 0.3    | 0.05   |
| Sugar crops                             | 0      | 0      | 0      | 0      | 0      |
| Vegetables                              | 0      | 4.34   | 2.2    | 1.23   | 0.21   |
| <b>Kyrgyzstan</b>                       |        |        |        |        |        |
| Cereals                                 | 27.08  | 138.21 | 49.7   | 67.06  | 99.21  |
| Fiber                                   | 7      | 41.92  | 16.01  | 19.17  | 26.12  |
| Fruit                                   | 0.55   | 2.86   | 1.04   | 1.39   | 2.05   |
| Livestock                               | 226.09 | 788.86 | 221.92 | 150.03 | 106.61 |
| Oil crops                               | 2.48   | 12.59  | 4.47   | 4.51   | 5.38   |
| Pulses                                  | 2.54   | 39.99  | 18.7   | 10.18  | 1.83   |
| Roots & tubers                          | 8.04   | 40.69  | 14.58  | 19.97  | 29.82  |
| Sugar crops                             | 1.77   | 9.59   | 3.55   | 5.02   | 7.6    |
| Vegetables                              | 2.82   | 14.51  | 5.24   | 6.93   | 10.14  |
| <b>Lao People's Democratic Republic</b> |        |        |        |        |        |
| Cereals                                 | 274.18 | 459.89 | 22.26  | 8.16   | 0      |
| Fiber                                   | 2.82   | 4.07   | 0.14   | 0.04   | 0      |
| Fruit                                   | 6.7    | 13.32  | 0.81   | 0.33   | 0      |
| Livestock                               | 8.29   | 14.49  | 0.71   | 0.26   | 0      |
| Oil crops                               | 40.63  | 58.69  | 1.97   | 0.58   | 0      |
| Pulses                                  | 2.81   | 5.09   | 0.26   | 0.1    | 0      |
| Roots & tubers                          | 18.29  | 29.86  | 1.43   | 0.53   | 0      |
| Sugar crops                             | 0.7    | 1.61   | 0.11   | 0.04   | 0      |
| Vegetables                              | 0      | 0      | 0      | 0      | 0      |
| <b>Latvia</b>                           |        |        |        |        |        |
| Cereals                                 | 8.21   | 67.53  | 51.9   | 220.68 | 92.91  |
| Fiber                                   | 0      | 0      | 0      | 0      | 0      |
| Fruit                                   | 0.04   | 0.31   | 0.23   | 0.89   | 0.36   |
| Livestock                               | 22.21  | 177.06 | 133.12 | 487.35 | 185.59 |
| Oil crops                               | 8.34   | 68.32  | 52.37  | 212.14 | 86.52  |
| Pulses                                  | 0.03   | 0.27   | 0.21   | 0.78   | 0.3    |
| Roots & tubers                          | 1      | 8.26   | 6.38   | 27.93  | 11.96  |
| Sugar crops                             | 0.67   | 5.69   | 4.47   | 21.06  | 9.37   |
| Vegetables                              | 0.08   | 0.67   | 0.5    | 1.94   | 0.77   |
| <b>Lebanon</b>                          |        |        |        |        |        |



|                  |       |        |        |         |        |
|------------------|-------|--------|--------|---------|--------|
| Cereals          | 5.11  | 23.46  | 8.34   | 8.93    | 11.7   |
| Fiber            | 0     | 0      | 0      | 0       | 0      |
| Fruit            | 6.92  | 35.08  | 12.83  | 14.51   | 19.4   |
| Livestock        | 24.92 | 124.08 | 45.59  | 59.11   | 86.98  |
| Oil crops        | 8.98  | 43.03  | 15.54  | 8.65    | 3.22   |
| Pulses           | 0.09  | 0.46   | 0.17   | 0.2     | 0.27   |
| Roots & tubers   | 1.32  | 12.04  | 5.28   | 9.09    | 15     |
| Sugar crops      | 0.44  | 2.33   | 0.87   | 1.07    | 1.5    |
| Vegetables       | 2.58  | 14.14  | 5.4    | 6.07    | 8.09   |
| <b>Lesotho</b>   |       |        |        |         |        |
| Cereals          | 2.18  | 5.39   | 0.69   | 0       | 0      |
| Fiber            | 0     | 0      | 0      | 0       | 0      |
| Fruit            | 0     | 0      | 0      | 0       | 0      |
| Livestock        | 10.18 | 25.03  | 3.21   | 0.02    | 0      |
| Oil crops        | 0     | 0      | 0      | 0       | 0      |
| Pulses           | 1.53  | 2.69   | 0.27   | 0       | 0      |
| Roots & tubers   | 2.01  | 5.91   | 0.82   | 0       | 0      |
| Sugar crops      | 0     | 0      | 0      | 0       | 0      |
| Vegetables       | 0     | 0      | 0      | 0       | 0      |
| <b>Liberia</b>   |       |        |        |         |        |
| Cereals          | 14.53 | 32.87  | 3.97   | 0.02    | 0      |
| Fiber            | 0     | 0      | 0      | 0       | 0      |
| Fruit            | 2.13  | 5.1    | 0.64   | 0       | 0      |
| Livestock        | 0.68  | 3.5    | 0.57   | 0       | 0      |
| Oil crops        | 2.7   | 6.6    | 0.83   | 0       | 0      |
| Pulses           | 0.27  | 0.66   | 0.08   | 0       | 0      |
| Roots & tubers   | 20.83 | 50.1   | 6.27   | 0.03    | 0      |
| Sugar crops      | 0.64  | 1.72   | 0.23   | 0       | 0      |
| Vegetables       | 0.03  | 0.1    | 0.02   | 0       | 0      |
| <b>Libya</b>     |       |        |        |         |        |
| Cereals          | 6.13  | 26.58  | 8.59   | 12.01   | 18.06  |
| Fiber            | 0     | 0      | 0      | 0       | 0      |
| Fruit            | 8.78  | 38.75  | 12.69  | 18.03   | 27.34  |
| Livestock        | 17.83 | 143.8  | 61.4   | 60.66   | 71.06  |
| Oil crops        | 10.5  | 46.32  | 15.17  | 21.55   | 32.68  |
| Pulses           | 0.27  | 1.18   | 0.39   | 0.55    | 0.83   |
| Roots & tubers   | 2.1   | 9.25   | 3.03   | 4.3     | 6.53   |
| Sugar crops      | 0     | 0      | 0      | 0       | 0      |
| Vegetables       | 4.69  | 20.68  | 6.77   | 9.62    | 14.59  |
| <b>Lithuania</b> |       |        |        |         |        |
| Cereals          | 34.46 | 175.52 | 105.05 | 348.71  | 122.78 |
| Fiber            | 0     | 0      | 0      | 0       | 0      |
| Fruit            | 0.33  | 1.28   | 0.56   | 1.57    | 0.51   |
| Livestock        | 103.1 | 513.73 | 303    | 1022.14 | 365.23 |
| Oil crops        | 23.61 | 132.1  | 83.84  | 286.85  | 103.97 |
| Pulses           | 1.29  | 5.09   | 2.24   | 6.18    | 2.02   |

|                   |        |        |       |        |       |
|-------------------|--------|--------|-------|--------|-------|
| Roots & tubers    | 3.14   | 14.34  | 7.7   | 24.27  | 8.38  |
| Sugar crops       | 1.51   | 15.49  | 13.47 | 47.99  | 16.64 |
| Vegetables        | 0.28   | 1.11   | 0.49  | 1.36   | 0.45  |
| <b>Luxembourg</b> |        |        |       |        |       |
| Cereals           | 0      | 7.39   | 9.47  | 25.23  | 4.02  |
| Fiber             | 0      | 0      | 0     | 0      | 0     |
| Fruit             | 0      | 0.32   | 0.41  | 1.08   | 0.17  |
| Livestock         | 0      | 52.28  | 66.97 | 178.41 | 28.41 |
| Oil crops         | 0      | 7.29   | 9.34  | 24.88  | 3.96  |
| Pulses            | 0      | 0.1    | 0.13  | 0.35   | 0.06  |
| Roots & tubers    | 0      | 0.27   | 0.34  | 0.92   | 0.15  |
| Sugar crops       | 0      | 0      | 0     | 0      | 0     |
| Vegetables        | 0      | 0      | 0     | 0.01   | 0     |
| <b>Madagascar</b> |        |        |       |        |       |
| Cereals           | 438.63 | 530.96 | 30.9  | 0.02   | 0     |
| Fiber             | 5.74   | 6.95   | 0.41  | 0      | 0     |
| Fruit             | 18     | 21.8   | 1.28  | 0      | 0     |
| Livestock         | 285.56 | 345.4  | 19.6  | 0.01   | 0     |
| Oil crops         | 2.75   | 3.33   | 0.2   | 0      | 0     |
| Pulses            | 48.22  | 58.28  | 3.26  | 0      | 0     |
| Roots & tubers    | 268.17 | 324.54 | 18.77 | 0.01   | 0     |
| Sugar crops       | 8.11   | 15.94  | 1.73  | 0.01   | 0     |
| Vegetables        | 2.05   | 2.48   | 0.15  | 0      | 0     |
| <b>Malawi</b>     |        |        |       |        |       |
| Cereals           | 50.47  | 74.38  | 6.51  | 9.22   | 0     |
| Fiber             | 20.99  | 32.09  | 2.83  | 1.5    | 0     |
| Fruit             | 6.41   | 10.36  | 0.99  | 0.64   | 0     |
| Livestock         | 23.63  | 28.92  | 1.57  | 1.23   | 0     |
| Oil crops         | 68.49  | 82.7   | 4.29  | 0.04   | 0     |
| Pulses            | 58.99  | 80.23  | 6.36  | 2.66   | 0     |
| Roots & tubers    | 219.39 | 308.01 | 24.94 | 17.72  | 0     |
| Sugar crops       | 8.53   | 13.8   | 1.32  | 0.85   | 0     |
| Vegetables        | 5.13   | 8.29   | 0.79  | 0.51   | 0     |
| <b>Malaysia</b>   |        |        |       |        |       |
| Cereals           | 37.71  | 279.69 | 32.2  | 295.03 | 0     |
| Fiber             | 0      | 0      | 0     | 0      | 0     |
| Fruit             | 9.78   | 21.75  | 1.54  | 9.84   | 0     |
| Livestock         | 67.33  | 232.47 | 20.2  | 61.11  | 0     |
| Oil crops         | 9      | 19.85  | 1.4   | 8.91   | 0     |
| Pulses            | 0      | 0      | 0     | 0      | 0     |
| Roots & tubers    | 2.78   | 7.55   | 0.62  | 3.54   | 0     |
| Sugar crops       | 1.18   | 2.4    | 0.15  | 1.16   | 0     |
| Vegetables        | 0.95   | 2.06   | 0.14  | 0.91   | 0     |
| <b>Mali</b>       |        |        |       |        |       |
| Cereals           | 180.31 | 303.49 | 29.47 | 0.11   | 0     |
| Fiber             | 133.23 | 245.55 | 25.85 | 0.11   | 0     |

|                   |         |         |         |         |         |
|-------------------|---------|---------|---------|---------|---------|
| Fruit             | 3.36    | 4.84    | 0.41    | 0       | 0       |
| Livestock         | 468.68  | 976.92  | 113.74  | 0.53    | 0       |
| Oil crops         | 18.17   | 25.71   | 2.18    | 0.01    | 0       |
| Pulses            | 0.04    | 0.05    | 0       | 0       | 0       |
| Roots & tubers    | 23.35   | 45.32   | 4.93    | 0.02    | 0       |
| Sugar crops       | 1.01    | 2.1     | 0.25    | 0       | 0       |
| Vegetables        | 4.56    | 10.93   | 1.37    | 0.01    | 0       |
| <b>Mauritania</b> |         |         |         |         |         |
| Cereals           | 10.36   | 20.36   | 2.2     | 0.01    | 0       |
| Fiber             | 0       | 0       | 0       | 0       | 0       |
| Fruit             | 4.01    | 7.4     | 0.76    | 0       | 0       |
| Livestock         | 191.79  | 294.26  | 24.55   | 0.09    | 0       |
| Oil crops         | 0       | 0       | 0       | 0       | 0       |
| Pulses            | 3.39    | 4.94    | 0.38    | 0       | 0       |
| Roots & tubers    | 0.39    | 0.64    | 0.06    | 0       | 0       |
| Sugar crops       | 0       | 0       | 0       | 0       | 0       |
| Vegetables        | 0       | 0       | 0       | 0       | 0       |
| <b>Mauritius</b>  |         |         |         |         |         |
| Cereals           | 0       | 0       | 0       | 0       | 0       |
| Fiber             | 0       | 0       | 0       | 0       | 0       |
| Fruit             | 0       | 0       | 0       | 0       | 0       |
| Livestock         | 0       | 0       | 0       | 0       | 0       |
| Oil crops         | 0       | 0       | 0       | 0       | 0       |
| Pulses            | 0       | 0       | 0       | 0       | 0       |
| Roots & tubers    | 0       | 0       | 0       | 0       | 0       |
| Sugar crops       | 0       | 0       | 0       | 0       | 0       |
| Vegetables        | 0       | 0       | 0       | 0       | 0       |
| <b>Mexico</b>     |         |         |         |         |         |
| Cereals           | 288.92  | 699.61  | 796.46  | 590.3   | 902.21  |
| Fiber             | 0.14    | 7.12    | 26.8    | 86.96   | 288.22  |
| Fruit             | 49.67   | 214.59  | 443.55  | 286.18  | 416.55  |
| Livestock         | 1261.11 | 3098.87 | 3537.23 | 2408.15 | 3485.18 |
| Oil crops         | 166.36  | 295.34  | 76.55   | 50.82   | 77.85   |
| Pulses            | 280.3   | 524.28  | 219.56  | 140.33  | 194.83  |
| Roots & tubers    | 15.57   | 37.56   | 41.83   | 28.53   | 39.58   |
| Sugar crops       | 57.83   | 139.99  | 150.11  | 82.03   | 84.75   |
| Vegetables        | 47.2    | 108.62  | 110.58  | 94.51   | 173.62  |
| <b>Mongolia</b>   |         |         |         |         |         |
| Cereals           | 5.88    | 8.25    | 3.26    | 20.3    | 0       |
| Fiber             | 0       | 0       | 0       | 0       | 0       |
| Fruit             | 0       | 0       | 0       | 0       | 0       |
| Livestock         | 159.11  | 155.01  | 51.97   | 151.09  | 0       |
| Oil crops         | 0.59    | 13.68   | 7.14    | 4.21    | 0       |
| Pulses            | 0.06    | 0.08    | 0.03    | 0.2     | 0       |
| Roots & tubers    | 1.45    | 1.99    | 0.78    | 4.97    | 0       |
| Sugar crops       | 0       | 0       | 0       | 0       | 0       |

|                   |         |         |        |        |        |
|-------------------|---------|---------|--------|--------|--------|
| Vegetables        | 0.09    | 0.13    | 0.05   | 0.32   | 0      |
| <b>Montenegro</b> |         |         |        |        |        |
| Cereals           | 0.28    | 0.96    | 0.29   | 0.33   | 0.02   |
| Fiber             | 0       | 0       | 0      | 0      | 0      |
| Fruit             | 0.89    | 3       | 0.89   | 0.98   | 0.05   |
| Livestock         | 314.96  | 1124.4  | 376.46 | 450.39 | 20.93  |
| Oil crops         | 0.2     | 0.62    | 0.14   | 0.13   | 0.01   |
| Pulses            | 0.29    | 0.99    | 0.3    | 0.34   | 0.02   |
| Roots & tubers    | 1.63    | 5.52    | 1.67   | 1.88   | 0.09   |
| Sugar crops       | 0       | 0       | 0      | 0      | 0      |
| Vegetables        | 0.41    | 1.4     | 0.42   | 0.47   | 0.02   |
| <b>Morocco</b>    |         |         |        |        |        |
| Cereals           | 221.68  | 790.68  | 229.58 | 229.19 | 282.78 |
| Fiber             | 0.03    | 0.11    | 0.03   | 0.03   | 0.03   |
| Fruit             | 44.44   | 150.95  | 42.01  | 38.23  | 43.5   |
| Livestock         | 349.82  | 1096.24 | 283.01 | 197.54 | 160.26 |
| Oil crops         | 65.93   | 226.92  | 63.76  | 66.71  | 85.77  |
| Pulses            | 3.52    | 12.96   | 3.84   | 3.3    | 3.47   |
| Roots & tubers    | 19.55   | 65.78   | 18.13  | 15.8   | 17.18  |
| Sugar crops       | 46.53   | 160.66  | 46.2   | 44.31  | 53.72  |
| Vegetables        | 38.99   | 132.03  | 36.63  | 30.77  | 32.03  |
| <b>Mozambique</b> |         |         |        |        |        |
| Cereals           | 22.98   | 65.32   | 8.97   | 13.9   | 0      |
| Fiber             | 18.22   | 28.28   | 2.45   | 101.72 | 0      |
| Fruit             | 2.96    | 7.17    | 0.91   | 2.03   | 0      |
| Livestock         | 23.12   | 81.7    | 12.11  | 0.07   | 0      |
| Oil crops         | 62.57   | 130.2   | 15.03  | 45.44  | 0      |
| Pulses            | 70.8    | 118.08  | 11.62  | 8.07   | 0      |
| Roots & tubers    | 216.93  | 529.05  | 66.14  | 25.72  | 0      |
| Sugar crops       | 4.25    | 14.77   | 2.2    | 0.01   | 0      |
| Vegetables        | 5.6     | 10.31   | 1.1    | 2.98   | 0      |
| <b>Myanmar</b>    |         |         |        |        |        |
| Cereals           | 2885.11 | 5264.61 | 289.27 | 111.29 | 0      |
| Fiber             | 63.42   | 107.08  | 5.15   | 12.35  | 0      |
| Fruit             | 4.7     | 7.9     | 0.37   | 0.13   | 0      |
| Livestock         | 562.48  | 903.12  | 40.04  | 19.26  | 0      |
| Oil crops         | 2547.55 | 4334.11 | 204.38 | 73.03  | 0      |
| Pulses            | 1145.69 | 1921.36 | 90.64  | 32.61  | 0      |
| Roots & tubers    | 30.55   | 51.98   | 2.46   | 0.88   | 0      |
| Sugar crops       | 31.22   | 48.61   | 2.08   | 0.72   | 0      |
| Vegetables        | 67.26   | 112.92  | 5.33   | 1.92   | 0      |
| <b>Namibia</b>    |         |         |        |        |        |
| Cereals           | 2.43    | 7.98    | 1.18   | 1.39   | 0      |
| Fiber             | 0.02    | 0.06    | 0.01   | 0.03   | 0      |
| Fruit             | 0.26    | 1.01    | 0.16   | 0.55   | 0      |
| Livestock         | 41.03   | 69.86   | 6.76   | 22.13  | 0      |

|                    |        |         |         |         |          |
|--------------------|--------|---------|---------|---------|----------|
| Oil crops          | 0.01   | 0.02    | 0       | 0.01    | 0        |
| Pulses             | 0.71   | 2.55    | 0.39    | 1.36    | 0        |
| Roots & tubers     | 0      | 0       | 0       | 0       | 0        |
| Sugar crops        | 0      | 0       | 0       | 0       | 0        |
| Vegetables         | 0.09   | 0.35    | 0.05    | 0.19    | 0        |
| <b>Nepal</b>       |        |         |         |         |          |
| Cereals            | 568.81 | 1036.32 | 116     | 22.5    | 0        |
| Fiber              | 0.01   | 0.02    | 0       | 0       | 0        |
| Fruit              | 4.85   | 8.71    | 0.98    | 0.19    | 0        |
| Livestock          | 577.87 | 1022.85 | 112.03  | 21.91   | 0        |
| Oil crops          | 17.82  | 34.18   | 3.92    | 0.76    | 0        |
| Pulses             | 13.66  | 23.91   | 2.62    | 0.51    | 0        |
| Roots & tubers     | 55.36  | 100.88  | 11.27   | 2.19    | 0        |
| Sugar crops        | 7.93   | 14.85   | 1.68    | 0.33    | 0        |
| Vegetables         | 0      | 0       | 0       | 0       | 0        |
| <b>Netherlands</b> |        |         |         |         |          |
| Cereals            | 12.49  | 73.9    | 48.69   | 243.68  | 113.53   |
| Fiber              | 0      | 0       | 0       | 0       | 0        |
| Fruit              | 0.62   | 3.5     | 2.22    | 9.62    | 4.19     |
| Livestock          | 333.73 | 2932.08 | 2363.65 | 6494.65 | 1679.28  |
| Oil crops          | 0.03   | 2.07    | 2.51    | 16.32   | 7.82     |
| Pulses             | 0.18   | 1.05    | 0.7     | 2.98    | 1.28     |
| Roots & tubers     | 9.64   | 71.5    | 55.39   | 311.42  | 148.65   |
| Sugar crops        | 18.77  | 107.31  | 69.27   | 339.93  | 156.97   |
| Vegetables         | 8.45   | 47.73   | 30.2    | 131.92  | 57.64    |
| <b>New Zealand</b> |        |         |         |         |          |
| Cereals            | 0.16   | 4.8     | 7.27    | 36.64   | 186.66   |
| Fiber              | 0      | 0       | 0       | 0       | 0        |
| Fruit              | 0.03   | 0.87    | 1.31    | 6.62    | 33.73    |
| Livestock          | 23.03  | 640.57  | 916.94  | 3867.73 | 12745.98 |
| Oil crops          | 0.01   | 0.17    | 0.25    | 1.27    | 6.47     |
| Pulses             | 0.01   | 0.23    | 0.35    | 1.77    | 9        |
| Roots & tubers     | 0.03   | 0.98    | 1.48    | 7.47    | 38.04    |
| Sugar crops        | 0      | 0       | 0       | 0       | 0        |
| Vegetables         | 0.01   | 0.18    | 0.27    | 1.38    | 7.02     |
| <b>Nicaragua</b>   |        |         |         |         |          |
| Cereals            | 17.96  | 36.97   | 26.63   | 17.48   | 21.11    |
| Fiber              | 0.47   | 1.01    | 0.81    | 0.49    | 0.53     |
| Fruit              | 3.94   | 8.49    | 6.98    | 4.19    | 4.51     |
| Livestock          | 101.29 | 225.16  | 205.78  | 127.84  | 144.31   |
| Oil crops          | 9.37   | 19.97   | 15.96   | 9.61    | 10.4     |
| Pulses             | 53.78  | 100.44  | 41.58   | 22.29   | 19.96    |
| Roots & tubers     | 2.62   | 5.57    | 4.42    | 2.65    | 2.84     |
| Sugar crops        | 6.11   | 13.04   | 10.45   | 6.28    | 6.79     |
| Vegetables         | 0.29   | 0.62    | 0.51    | 0.3     | 0.32     |
| <b>Niger</b>       |        |         |         |         |          |

|                 |          |          |         |         |        |
|-----------------|----------|----------|---------|---------|--------|
| Cereals         | 133.91   | 184.55   | 13.84   | 39.62   | 0      |
| Fiber           | 4.56     | 6.05     | 0.43    | 0       | 0      |
| Fruit           | 1.99     | 2.89     | 0.23    | 0.97    | 0      |
| Livestock       | 414.94   | 564.08   | 41.38   | 58.76   | 0      |
| Oil crops       | 160.26   | 220.22   | 16.44   | 35.13   | 0      |
| Pulses          | 6.56     | 8.86     | 0.64    | 1.23    | 0      |
| Roots & tubers  | 14.58    | 19.81    | 1.45    | 3.62    | 0      |
| Sugar crops     | 1.02     | 1.25     | 0.07    | 0       | 0      |
| Vegetables      | 29.59    | 40.38    | 2.97    | 7.66    | 0      |
| <b>Nigeria</b>  |          |          |         |         |        |
| Cereals         | 1063.01  | 1839.58  | 180.79  | 79.41   | 0      |
| Fiber           | 165.43   | 312.69   | 33.41   | 0.15    | 0      |
| Fruit           | 32.75    | 64.38    | 7.11    | 9.48    | 0      |
| Livestock       | 279.41   | 448.43   | 42.16   | 150.91  | 0      |
| Oil crops       | 843.86   | 1557.43  | 162.61  | 100.45  | 0      |
| Pulses          | 7.29     | 12.66    | 1.25    | 0.01    | 0      |
| Roots & tubers  | 3202.04  | 6564.99  | 743.36  | 1031.93 | 0      |
| Sugar crops     | 5        | 6.03     | 0.32    | 0       | 0      |
| Vegetables      | 146.69   | 233.74   | 21.11   | 23.2    | 0      |
| <b>Norway</b>   |          |          |         |         |        |
| Cereals         | 18.89    | 139.49   | 99.02   | 184.8   | 18.55  |
| Fiber           | 0        | 0        | 0       | 0       | 0      |
| Fruit           | 0.03     | 0.2      | 0.14    | 0.27    | 0.03   |
| Livestock       | 40.47    | 454.37   | 411.36  | 926.63  | 124.27 |
| Oil crops       | 1.16     | 8.55     | 6.05    | 11.25   | 1.12   |
| Pulses          | 0        | 0        | 0       | 0       | 0      |
| Roots & tubers  | 1.26     | 9.3      | 6.61    | 12.34   | 1.24   |
| Sugar crops     | 0        | 0        | 0       | 0       | 0      |
| Vegetables      | 0.05     | 0.38     | 0.27    | 0.5     | 0.05   |
| <b>Oman</b>     |          |          |         |         |        |
| Cereals         | 0.25     | 1.17     | 0.43    | 0.21    | 0.04   |
| Fiber           | 0        | 0        | 0       | 0       | 0      |
| Fruit           | 18.08    | 83.61    | 31.01   | 15.04   | 2.67   |
| Livestock       | 24.85    | 114.94   | 42.63   | 20.68   | 3.67   |
| Oil crops       | 0        | 0        | 0       | 0       | 0      |
| Pulses          | 0        | 0        | 0       | 0       | 0      |
| Roots & tubers  | 0.07     | 0.34     | 0.13    | 0.06    | 0.01   |
| Sugar crops     | 0        | 0        | 0       | 0       | 0      |
| Vegetables      | 0.6      | 2.76     | 1.02    | 0.5     | 0.09   |
| <b>Pakistan</b> |          |          |         |         |        |
| Cereals         | 2696.26  | 6380.11  | 808.3   | 156.1   | 0      |
| Fiber           | 1545.86  | 4018.29  | 525.07  | 101.84  | 0      |
| Fruit           | 202.01   | 481.53   | 61.62   | 11.77   | 0      |
| Livestock       | 12609.76 | 22065.85 | 2433.22 | 465.56  | 0      |
| Oil crops       | 399.46   | 918.72   | 115.74  | 22.16   | 0      |
| Pulses          | 71.67    | 161.6    | 20.14   | 3.87    | 0      |

|                         |        |         |        |         |          |
|-------------------------|--------|---------|--------|---------|----------|
| Roots & tubers          | 54.04  | 116.48  | 14.18  | 2.75    | 0        |
| Sugar crops             | 132.86 | 319.5   | 40.87  | 7.85    | 0        |
| Vegetables              | 111.38 | 277.21  | 36.03  | 6.88    | 0        |
| <b>Panama</b>           |        |         |        |         |          |
| Cereals                 | 12.8   | 26.51   | 18.1   | 8.35    | 5.16     |
| Fiber                   | 0      | 0       | 0      | 0       | 0        |
| Fruit                   | 3.79   | 9.84    | 11.93  | 5.65    | 3.8      |
| Livestock               | 23.22  | 65.26   | 88.64  | 40.64   | 24.68    |
| Oil crops               | 0.34   | 0.89    | 1.12   | 0.55    | 0.42     |
| Pulses                  | 0.69   | 1.72    | 1.98   | 1.09    | 1.03     |
| Roots & tubers          | 1.16   | 2.83    | 3.03   | 1.4     | 0.88     |
| Sugar crops             | 1.37   | 4.48    | 7.21   | 3.08    | 1.41     |
| Vegetables              | 0.84   | 2.15    | 2.52   | 1.18    | 0.76     |
| <b>Papua New Guinea</b> |        |         |        |         |          |
| Cereals                 | 0.39   | 0.51    | 0.19   | 0.1     | 0        |
| Fiber                   | 0      | 0       | 0      | 0       | 0        |
| Fruit                   | 9.25   | 13.52   | 5.21   | 2.83    | 0        |
| Livestock               | 5.11   | 3.84    | 0.95   | 0.42    | 0        |
| Oil crops               | 19.85  | 29.03   | 11.19  | 6.08    | 0        |
| Pulses                  | 0.24   | 0.35    | 0.14   | 0.07    | 0        |
| Roots & tubers          | 55.27  | 78.48   | 29.93  | 16.19   | 0        |
| Sugar crops             | 1.01   | 1.47    | 0.57   | 0.31    | 0        |
| Vegetables              | 0.01   | 0.02    | 0.01   | 0       | 0        |
| <b>Paraguay</b>         |        |         |        |         |          |
| Cereals                 | 0.63   | 11.64   | 14.26  | 49.41   | 284.84   |
| Fiber                   | 1.12   | 18.03   | 17.97  | 32.64   | 91.24    |
| Fruit                   | 0.2    | 3.72    | 4.57   | 14.48   | 69.09    |
| Livestock               | 4.03   | 64.03   | 61.93  | 105.89  | 330.27   |
| Oil crops               | 9.04   | 217.85  | 346.18 | 1711.53 | 11135.47 |
| Pulses                  | 0.86   | 13.53   | 12.93  | 19.86   | 42.12    |
| Roots & tubers          | 1.35   | 25.02   | 30.6   | 100.03  | 516.65   |
| Sugar crops             | 0.18   | 3.22    | 3.75   | 9.01    | 20.91    |
| Vegetables              | 0.05   | 0.96    | 1.09   | 2.69    | 8.64     |
| <b>Peru</b>             |        |         |        |         |          |
| Cereals                 | 11.62  | 180.14  | 166.07 | 214.05  | 282.11   |
| Fiber                   | 2.95   | 45.72   | 42.12  | 53.89   | 67.38    |
| Fruit                   | 2.14   | 33.92   | 32.78  | 48.65   | 58.26    |
| Livestock               | 28.08  | 432     | 392.16 | 474.91  | 587.15   |
| Oil crops               | 0.67   | 10.3    | 9.48   | 12.09   | 15.02    |
| Pulses                  | 2.06   | 31.59   | 28.35  | 31.64   | 22.81    |
| Roots & tubers          | 6.05   | 94.46   | 88.45  | 121.38  | 176.27   |
| Sugar crops             | 1      | 15.47   | 14.32  | 18.73   | 24.76    |
| Vegetables              | 1.99   | 30.66   | 27.91  | 33.92   | 38.35    |
| <b>Philippines</b>      |        |         |        |         |          |
| Cereals                 | 951.4  | 2163.58 | 155.9  | 1316.71 | 0        |
| Fiber                   | 0.68   | 1.53    | 0.11   | 0.74    | 0        |

|                          |         |         |         |         |        |
|--------------------------|---------|---------|---------|---------|--------|
| Fruit                    | 68.51   | 176.84  | 13.84   | 88.84   | 0      |
| Livestock                | 130.07  | 276.01  | 16.85   | 18.07   | 0      |
| Oil crops                | 213.63  | 551.51  | 43.18   | 277.33  | 0      |
| Pulses                   | 8.4     | 21.67   | 1.7     | 10.89   | 0      |
| Roots & tubers           | 79.37   | 217.81  | 17.51   | 58.55   | 0      |
| Sugar crops              | 77.49   | 202.18  | 15.11   | 21.72   | 0      |
| Vegetables               | 7.34    | 18.96   | 1.48    | 9.52    | 0      |
| <b>Poland</b>            |         |         |         |         |        |
| Cereals                  | 353.6   | 1414.11 | 646.19  | 2171.97 | 831.52 |
| Fiber                    | 0       | 0       | 0       | 0       | 0      |
| Fruit                    | 8.34    | 31.16   | 12.59   | 34.12   | 11.35  |
| Livestock                | 1320.97 | 4903.09 | 1962.56 | 5084.64 | 1608.9 |
| Oil crops                | 97.41   | 645.71  | 483.11  | 2481.42 | 1126.1 |
| Pulses                   | 7.99    | 29.85   | 12.03   | 32.11   | 10.54  |
| Roots & tubers           | 110.55  | 375.62  | 123.47  | 254.51  | 70.11  |
| Sugar crops              | 65.74   | 308.27  | 173.45  | 667.19  | 266.58 |
| Vegetables               | 17.85   | 65.09   | 25.25   | 69.07   | 23.56  |
| <b>Portugal</b>          |         |         |         |         |        |
| Cereals                  | 7.81    | 33.66   | 17.26   | 80.79   | 37.03  |
| Fiber                    | 0       | 0       | 0       | 0       | 0      |
| Fruit                    | 18.07   | 60.73   | 19.62   | 51.29   | 18.67  |
| Livestock                | 340.37  | 1050.19 | 279.87  | 700.91  | 263.67 |
| Oil crops                | 10.08   | 38.96   | 16.9    | 83.53   | 40.67  |
| Pulses                   | 0.3     | 1.13    | 0.47    | 1.96    | 0.89   |
| Roots & tubers           | 7.69    | 26.98   | 9.09    | 13.69   | 2      |
| Sugar crops              | 0.7     | 6.52    | 5.71    | 25.29   | 10.24  |
| Vegetables               | 7.83    | 29.45   | 12.22   | 50.9    | 23.03  |
| <b>Qatar</b>             |         |         |         |         |        |
| Cereals                  | 0       | 0       | 0       | 0       | 0      |
| Fiber                    | 0       | 0       | 0       | 0       | 0      |
| Fruit                    | 0       | 0       | 0       | 0       | 0      |
| Livestock                | 3.33    | 15.4    | 5.71    | 2.77    | 0.49   |
| Oil crops                | 0       | 0       | 0       | 0       | 0      |
| Pulses                   | 0       | 0       | 0       | 0       | 0      |
| Roots & tubers           | 0       | 0       | 0       | 0       | 0      |
| Sugar crops              | 0       | 0       | 0       | 0       | 0      |
| Vegetables               | 0       | 0       | 0       | 0       | 0      |
| <b>Republic of Korea</b> |         |         |         |         |        |
| Cereals                  | 756.25  | 1040.41 | 32.11   | 8.96    | 0      |
| Fiber                    | 0       | 0       | 0       | 0       | 0      |
| Fruit                    | 22.73   | 31.2    | 0.96    | 0.27    | 0      |
| Livestock                | 1282.29 | 1709.6  | 49.59   | 13.31   | 0      |
| Oil crops                | 253.27  | 339.57  | 9.97    | 2.69    | 0      |
| Pulses                   | 4.56    | 6.26    | 0.19    | 0.05    | 0      |
| Roots & tubers           | 53.82   | 72.7    | 2.17    | 0.59    | 0      |
| Sugar crops              | 0       | 0       | 0       | 0       | 0      |



|                                             |         |         |         |          |         |
|---------------------------------------------|---------|---------|---------|----------|---------|
| Vegetables                                  | 105.78  | 145.23  | 4.47    | 1.25     | 0       |
| <b>Romania</b>                              |         |         |         |          |         |
| Cereals                                     | 123.01  | 557.57  | 309.43  | 1168.62  | 454.88  |
| Fiber                                       | 0       | 0       | 0       | 0        | 0       |
| Fruit                                       | 3.31    | 16.82   | 10.77   | 50.93    | 22.17   |
| Livestock                                   | 460.6   | 1936.65 | 960.68  | 3283.45  | 1231.14 |
| Oil crops                                   | 58.9    | 304.04  | 195.93  | 899.53   | 385.54  |
| Pulses                                      | 3.88    | 15.05   | 6.54    | 19.31    | 6.73    |
| Roots & tubers                              | 28.18   | 113.73  | 51.12   | 119.57   | 31.41   |
| Sugar crops                                 | 8.65    | 32.38   | 13.1    | 39.39    | 14.51   |
| Vegetables                                  | 7.66    | 32.21   | 16.28   | 59.19    | 22.91   |
| <b>Russian Federation</b>                   |         |         |         |          |         |
| Cereals                                     | 1137.85 | 4833.5  | 2433.95 | 11622.85 | 5397.19 |
| Fiber                                       | 0       | 0       | 0       | 0        | 0       |
| Fruit                                       | 3.02    | 16.56   | 10.91   | 67.76    | 33.96   |
| Livestock                                   | 1310.35 | 7039.27 | 4451.64 | 18624.07 | 7753.59 |
| Oil crops                                   | 224.64  | 1037.14 | 575.76  | 2823.78  | 1308.67 |
| Pulses                                      | 21.49   | 91.65   | 45.15   | 177.97   | 75.6    |
| Roots & tubers                              | 235.56  | 924.96  | 404.55  | 1312.37  | 501.63  |
| Sugar crops                                 | 158.63  | 599.36  | 259.53  | 1523.49  | 782.52  |
| Vegetables                                  | 28      | 116.08  | 55.69   | 231.59   | 101.57  |
| <b>Rwanda</b>                               |         |         |         |          |         |
| Cereals                                     | 20.97   | 31.31   | 2.64    | 0.01     | 0       |
| Fiber                                       | 0       | 0       | 0       | 0        | 0       |
| Fruit                                       | 19.03   | 31.01   | 2.93    | 0.01     | 0       |
| Livestock                                   | 90.29   | 124.03  | 9.12    | 0.02     | 0       |
| Oil crops                                   | 35.52   | 45.3    | 2.89    | 0.01     | 0       |
| Pulses                                      | 129.49  | 202.98  | 18.29   | 0.06     | 0       |
| Roots & tubers                              | 153.04  | 222.18  | 17.75   | 0.05     | 0       |
| Sugar crops                                 | 0.25    | 0.42    | 0.04    | 0        | 0       |
| Vegetables                                  | 2.05    | 2.46    | 0.12    | 0        | 0       |
| <b>Saint Lucia</b>                          |         |         |         |          |         |
| Cereals                                     | 0       | 0       | 0       | 0        | 0       |
| Fiber                                       | 0       | 0       | 0       | 0        | 0       |
| Fruit                                       | 0       | 0       | 0       | 0        | 0       |
| Livestock                                   | 0       | 0       | 0       | 0        | 0       |
| Oil crops                                   | 0       | 0       | 0       | 0        | 0       |
| Pulses                                      | 0       | 0       | 0       | 0        | 0       |
| Roots & tubers                              | 0       | 0       | 0       | 0        | 0       |
| Sugar crops                                 | 0       | 0       | 0       | 0        | 0       |
| Vegetables                                  | 0       | 0       | 0       | 0        | 0       |
| <b>Saint Vincent and the<br/>Grenadines</b> |         |         |         |          |         |
| Cereals                                     | 0       | 0       | 0       | 0        | 0       |
| Fiber                                       | 0       | 0       | 0       | 0        | 0       |
| Fruit                                       | 0       | 0       | 0       | 0        | 0       |

|                     |        |        |        |        |        |
|---------------------|--------|--------|--------|--------|--------|
| Livestock           | 0      | 0      | 0      | 0      | 0      |
| Oil crops           | 0      | 0      | 0      | 0      | 0      |
| Pulses              | 0      | 0      | 0      | 0      | 0      |
| Roots & tubers      | 0      | 0      | 0      | 0      | 0      |
| Sugar crops         | 0      | 0      | 0      | 0      | 0      |
| Vegetables          | 0      | 0      | 0      | 0      | 0      |
| <b>Saudi Arabia</b> |        |        |        |        |        |
| Cereals             | 137.72 | 529.68 | 170.95 | 83.11  | 14.46  |
| Fiber               | 0      | 0      | 0      | 0      | 0      |
| Fruit               | 94.1   | 336.31 | 100.25 | 49.19  | 8.43   |
| Livestock           | 324.33 | 972.02 | 241.74 | 115.56 | 19.45  |
| Oil crops           | 14.53  | 30.78  | 3.77   | 1.49   | 0.22   |
| Pulses              | 0.35   | 1.39   | 0.46   | 0.22   | 0.04   |
| Roots & tubers      | 6.26   | 23.3   | 7.43   | 3.56   | 0.62   |
| Sugar crops         | 0      | 0      | 0      | 0      | 0      |
| Vegetables          | 10.51  | 32.87  | 8.6    | 4.14   | 0.7    |
| <b>Senegal</b>      |        |        |        |        |        |
| Cereals             | 35.72  | 81.55  | 10.09  | 0.05   | 0      |
| Fiber               | 9.93   | 32.68  | 4.76   | 0.03   | 0      |
| Fruit               | 4.68   | 6.79   | 0.57   | 0      | 0      |
| Livestock           | 65.55  | 107.71 | 10.22  | 0.04   | 0      |
| Oil crops           | 87.23  | 106.36 | 7.18   | 0.01   | 0      |
| Pulses              | 0.04   | 0.05   | 0      | 0      | 0      |
| Roots & tubers      | 17.32  | 21.16  | 1.3    | 0      | 0      |
| Sugar crops         | 1.57   | 5.85   | 0.88   | 0      | 0      |
| Vegetables          | 9.22   | 17.89  | 1.98   | 0.01   | 0      |
| <b>Serbia</b>       |        |        |        |        |        |
| Cereals             | 91.5   | 334.6  | 130.18 | 336.65 | 108.15 |
| Fiber               | 0      | 0      | 0      | 0      | 0      |
| Fruit               | 5.76   | 18.71  | 5.66   | 12.99  | 4.21   |
| Oil crops           | 92.36  | 360.34 | 157.85 | 449.85 | 150.55 |
| Pulses              | 6.87   | 22.97  | 7.49   | 17.97  | 5.8    |
| Roots & tubers      | 6.16   | 23.07  | 9.41   | 27.15  | 9.52   |
| Sugar crops         | 50.48  | 159.18 | 44.67  | 103.81 | 35.81  |
| Vegetables          | 4.42   | 15.41  | 5.45   | 12.86  | 3.92   |
| <b>Sierra Leone</b> |        |        |        |        |        |
| Cereals             | 66.73  | 146.48 | 17.56  | 0.08   | 0      |
| Fiber               | 0      | 0      | 0      | 0      | 0      |
| Fruit               | 0.16   | 0.5    | 0.07   | 0      | 0      |
| Livestock           | 8.56   | 13.7   | 1.29   | 0      | 0      |
| Oil crops           | 7.2    | 15.8   | 1.91   | 0.01   | 0      |
| Pulses              | 4.57   | 13.64  | 1.92   | 0.01   | 0      |
| Roots & tubers      | 60.4   | 144.4  | 18.11  | 0.09   | 0      |
| Sugar crops         | 0.25   | 0.41   | 0.04   | 0      | 0      |
| Vegetables          | 0.53   | 1.15   | 0.14   | 0      | 0      |
| <b>Slovakia</b>     |        |        |        |        |        |

|                     |        |         |         |         |         |
|---------------------|--------|---------|---------|---------|---------|
| Cereals             | 58.41  | 224.97  | 98.49   | 300.43  | 105.63  |
| Fiber               | 0      | 0       | 0       | 0       | 0       |
| Fruit               | 0.86   | 2.73    | 0.77    | 1.74    | 0.59    |
| Livestock           | 37.52  | 256.97  | 186.71  | 660.76  | 238.44  |
| Oil crops           | 68.36  | 255.89  | 108.31  | 329.78  | 115.75  |
| Pulses              | 0.76   | 2.9     | 1.25    | 3.86    | 1.37    |
| Roots & tubers      | 1.62   | 7.07    | 3.62    | 10.14   | 3.1     |
| Sugar crops         | 10.08  | 42.9    | 21.79   | 65.86   | 21.58   |
| Vegetables          | 0.84   | 3.16    | 1.33    | 4       | 1.41    |
| <b>Slovenia</b>     |        |         |         |         |         |
| Cereals             | 13.23  | 44.37   | 13.12   | 14.6    | 0.68    |
| Fiber               | 0      | 0       | 0       | 0       | 0       |
| Fruit               | 2.47   | 8.63    | 2.78    | 3.25    | 0.15    |
| Livestock           | 138.62 | 436.3   | 110.8   | 110.15  | 5.12    |
| Oil crops           | 3.98   | 13.35   | 3.95    | 4.39    | 0.2     |
| Pulses              | 0.49   | 1.66    | 0.52    | 0.59    | 0.03    |
| Roots & tubers      | 1.66   | 5.77    | 1.83    | 2.12    | 0.1     |
| Sugar crops         | 3.31   | 11.07   | 3.27    | 3.63    | 0.17    |
| Vegetables          | 0.24   | 0.84    | 0.26    | 0.3     | 0.01    |
| <b>Somalia</b>      |        |         |         |         |         |
| Cereals             | 10.58  | 15.78   | 1.27    | 0       | 0       |
| Fiber               | 2.48   | 3.8     | 0.32    | 0       | 0       |
| Fruit               | 4.14   | 6.32    | 0.53    | 0       | 0       |
| Livestock           | 649.2  | 1290.14 | 144.35  | 0.66    | 0       |
| Oil crops           | 184.91 | 282.61  | 23.58   | 0.08    | 0       |
| Pulses              | 8.5    | 14.2    | 1.34    | 0.01    | 0       |
| Roots & tubers      | 4.2    | 6.41    | 0.54    | 0       | 0       |
| Sugar crops         | 0.69   | 1.05    | 0.09    | 0       | 0       |
| Vegetables          | 0.65   | 0.99    | 0.08    | 0       | 0       |
| <b>South Africa</b> |        |         |         |         |         |
| Cereals             | 93.09  | 388.86  | 61.09   | 653.21  | 0       |
| Fiber               | 3.68   | 20.06   | 3.33    | 11.21   | 0       |
| Fruit               | 139.15 | 331.93  | 42.19   | 125.44  | 0       |
| Livestock           | 721.42 | 1726.63 | 217.89  | 1233.13 | 0       |
| Oil crops           | 133.43 | 465.47  | 68.95   | 366.71  | 0       |
| Pulses              | 3.45   | 29.48   | 5.2     | 37.04   | 0       |
| Roots & tubers      | 20.19  | 86.14   | 13.53   | 59.17   | 0       |
| Sugar crops         | 11.42  | 113.02  | 20.23   | 59.55   | 0       |
| Vegetables          | 15.15  | 60.82   | 9.42    | 41.35   | 0       |
| <b>Spain</b>        |        |         |         |         |         |
| Cereals             | 286.48 | 1296.37 | 690.07  | 2329.04 | 859.51  |
| Fiber               | 3.47   | 20.83   | 15.05   | 109.08  | 56.92   |
| Fruit               | 111.19 | 424.33  | 177.46  | 556.46  | 209.97  |
| Livestock           | 551.35 | 2702.78 | 1500.14 | 3907.37 | 1108.77 |
| Oil crops           | 116.08 | 562.2   | 335.39  | 2004.43 | 996.63  |
| Pulses              | 4.97   | 20.05   | 9.25    | 33.57   | 13.65   |

|                       |         |         |        |         |         |
|-----------------------|---------|---------|--------|---------|---------|
| Roots & tubers        | 15.15   | 66.67   | 32.71  | 88.85   | 28.44   |
| Sugar crops           | 18.51   | 116.65  | 83.13  | 367.32  | 154.94  |
| Vegetables            | 37.29   | 150.58  | 69.43  | 252.17  | 102.52  |
| <b>Sri Lanka</b>      |         |         |        |         |         |
| Cereals               | 243.99  | 461.43  | 52.87  | 151.55  | 0       |
| Fiber                 | 0       | 0       | 0      | 0       | 0       |
| Fruit                 | 3.54    | 7.81    | 0.97   | 3.39    | 0       |
| Livestock             | 72.32   | 120.12  | 12.83  | 34.51   | 0       |
| Oil crops             | 56.07   | 109.18  | 12.74  | 40.84   | 0       |
| Pulses                | 2.25    | 5.09    | 0.63   | 2.82    | 0       |
| Roots & tubers        | 10.74   | 23.29   | 2.84   | 9.67    | 0       |
| Sugar crops           | 1.85    | 4.35    | 0.55   | 2.96    | 0       |
| Vegetables            | 7.19    | 15.99   | 1.98   | 7.5     | 0       |
| <b>Sudan (former)</b> |         |         |        |         |         |
| Cereals               | 61.76   | 348.56  | 129.67 | 154.21  | 209.1   |
| Fiber                 | 29.29   | 111.04  | 33.37  | 40.15   | 56.15   |
| Fruit                 | 31.38   | 111.64  | 31.85  | 38.6    | 54.47   |
| Livestock             | 1264.59 | 4618.51 | 1359.7 | 1182.65 | 1260.64 |
| Oil crops             | 459     | 1376.43 | 329.86 | 359.4   | 480.17  |
| Pulses                | 4.96    | 18.26   | 5.36   | 6.04    | 8.08    |
| Roots & tubers        | 10.64   | 37.1    | 10.42  | 12.17   | 16.8    |
| Sugar crops           | 8.89    | 31.26   | 8.83   | 9.91    | 13.29   |
| Vegetables            | 36.12   | 126.95  | 35.85  | 40.25   | 53.99   |
| <b>Suriname</b>       |         |         |        |         |         |
| Cereals               | 0       | 0.35    | 0.88   | 6.11    | 41.72   |
| Fiber                 | 0       | 0       | 0      | 0       | 0       |
| Fruit                 | 0       | 0.05    | 0.11   | 0.78    | 5.32    |
| Livestock             | 0       | 0.08    | 0.19   | 1.32    | 9.01    |
| Oil crops             | 0       | 0       | 0.01   | 0.06    | 0.39    |
| Pulses                | 0       | 0       | 0      | 0       | 0.02    |
| Roots & tubers        | 0       | 0.01    | 0.01   | 0.09    | 0.6     |
| Sugar crops           | 0       | 0.01    | 0.02   | 0.13    | 0.88    |
| Vegetables            | 0       | 0       | 0      | 0.01    | 0.06    |
| <b>Swaziland</b>      |         |         |        |         |         |
| Cereals               | 0.8     | 1.68    | 0.2    | 0.06    | 0       |
| Fiber                 | 0.54    | 1.57    | 0.22   | 0.17    | 0       |
| Fruit                 | 4.36    | 9.63    | 1.16   | 0.29    | 0       |
| Livestock             | 12.01   | 25.7    | 3      | 7.58    | 0       |
| Oil crops             | 0       | 0       | 0      | 0       | 0       |
| Pulses                | 0.38    | 1.02    | 0.14   | 0.03    | 0       |
| Roots & tubers        | 0.34    | 0.67    | 0.07   | 0.02    | 0       |
| Sugar crops           | 14.31   | 31.43   | 3.76   | 1.16    | 0       |
| Vegetables            | 0.09    | 0.2     | 0.02   | 0.01    | 0       |
| <b>Sweden</b>         |         |         |        |         |         |
| Cereals               | 42.34   | 344.83  | 263.16 | 755.13  | 219.58  |
| Fiber                 | 0       | 0       | 0      | 0       | 0       |

|                             |        |         |         |         |        |
|-----------------------------|--------|---------|---------|---------|--------|
| Fruit                       | 0.03   | 0.23    | 0.19    | 0.54    | 0.15   |
| Livestock                   | 106.41 | 835.99  | 622.23  | 1753.04 | 507.19 |
| Oil crops                   | 17.82  | 134.84  | 97.56   | 266.21  | 75.41  |
| Pulses                      | 0.46   | 4.14    | 3.37    | 9.57    | 2.61   |
| Roots & tubers              | 2.85   | 20.28   | 13.97   | 31.58   | 6.74   |
| Sugar crops                 | 11.57  | 80.02   | 53.72   | 110.67  | 19.49  |
| Vegetables                  | 0.18   | 1.6     | 1.3     | 3.7     | 1.01   |
| <b>Switzerland</b>          |        |         |         |         |        |
| Cereals                     | 14.73  | 79.96   | 52.25   | 112.15  | 15.28  |
| Fiber                       | 0      | 0       | 0       | 0       | 0      |
| Fruit                       | 1.16   | 7.2     | 5.1     | 10.95   | 1.45   |
| Livestock                   | 148.12 | 1277.37 | 1013.24 | 2084.51 | 247.44 |
| Oil crops                   | 15.51  | 63.25   | 30.77   | 60.96   | 8.26   |
| Pulses                      | 0.34   | 1.91    | 1.29    | 2.81    | 0.38   |
| Roots & tubers              | 0.94   | 9.85    | 8.64    | 19.08   | 2.49   |
| Sugar crops                 | 3.69   | 40.63   | 36.49   | 81.79   | 10.9   |
| Vegetables                  | 0.13   | 0.73    | 0.49    | 1.07    | 0.15   |
| <b>Syrian Arab Republic</b> |        |         |         |         |        |
| Cereals                     | 355.22 | 1011.42 | 239.29  | 148.41  | 103.64 |
| Fiber                       | 119.7  | 401.49  | 114.65  | 87.21   | 83.35  |
| Fruit                       | 30.14  | 102.26  | 29.5    | 22.68   | 21.94  |
| Livestock                   | 505.74 | 1759.32 | 516.78  | 390.82  | 365.38 |
| Oil crops                   | 93.19  | 299.48  | 81.81   | 61.89   | 59.12  |
| Pulses                      | 1.05   | 3.48    | 0.98    | 0.75    | 0.73   |
| Roots & tubers              | 8.51   | 27.1    | 7.32    | 5.45    | 5.08   |
| Sugar crops                 | 29.3   | 88.24   | 22.59   | 12.92   | 7.13   |
| Vegetables                  | 17.8   | 60.66   | 17.62   | 12.84   | 11.51  |
| <b>Tajikistan</b>           |        |         |         |         |        |
| Cereals                     | 27.29  | 121.14  | 40.5    | 35.36   | 36.81  |
| Fiber                       | 45.66  | 200.94  | 66.86   | 59.14   | 62.63  |
| Fruit                       | 1.77   | 7.74    | 2.57    | 2.27    | 2.4    |
| Livestock                   | 59.1   | 277.06  | 94.53   | 110.18  | 148.31 |
| Oil crops                   | 0.56   | 2.55    | 0.88    | 0.69    | 0.63   |
| Pulses                      | 1.04   | 5.29    | 1.93    | 1.38    | 1.06   |
| Roots & tubers              | 5.57   | 24.85   | 8.32    | 7.32    | 7.67   |
| Sugar crops                 | 0      | 0       | 0       | 0       | 0      |
| Vegetables                  | 6.57   | 28.78   | 9.55    | 8.43    | 8.9    |
| <b>Thailand</b>             |        |         |         |         |        |
| Cereals                     | 2183.9 | 5963.31 | 482.27  | 207.54  | 0      |
| Fiber                       | 2.57   | 7.72    | 0.67    | 0.29    | 0      |
| Fruit                       | 98.29  | 249.15  | 19.43   | 8.31    | 0      |
| Livestock                   | 336.58 | 1073.12 | 95.71   | 42.11   | 0      |
| Oil crops                   | 270.84 | 781.07  | 66.49   | 29.04   | 0      |
| Pulses                      | 52.54  | 104.74  | 6.46    | 2.59    | 0      |
| Roots & tubers              | 569.81 | 2121.63 | 204.38  | 91.39   | 0      |
| Sugar crops                 | 151.54 | 351.07  | 25.42   | 10.68   | 0      |

|                                                  |        |         |         |         |         |
|--------------------------------------------------|--------|---------|---------|---------|---------|
| Vegetables                                       | 6.19   | 15.7    | 1.22    | 0.52    | 0       |
| <b>The former Yugoslav Republic of Macedonia</b> |        |         |         |         |         |
| Cereals                                          | 9.01   | 47.6    | 29.27   | 58.53   | 7.25    |
| Fiber                                            | 0      | 0       | 0       | 0       | 0       |
| Fruit                                            | 1.85   | 9.4     | 5.61    | 11.13   | 1.38    |
| Livestock                                        | 45.08  | 176.69  | 76.53   | 131.87  | 14.94   |
| Oil crops                                        | 0.83   | 4.14    | 2.41    | 4.71    | 0.57    |
| Pulses                                           | 0.58   | 2.94    | 1.75    | 3.44    | 0.42    |
| Roots & tubers                                   | 1.02   | 5.45    | 3.28    | 6.22    | 0.7     |
| Sugar crops                                      | 0.21   | 1.14    | 0.72    | 1.46    | 0.18    |
| Vegetables                                       | 1.18   | 6.02    | 3.58    | 7.09    | 0.87    |
| <b>Togo</b>                                      |        |         |         |         |         |
| Cereals                                          | 27.44  | 45.5    | 4.27    | 0.02    | 0       |
| Fiber                                            | 22.56  | 27.28   | 1.55    | 0       | 0       |
| Fruit                                            | 1.46   | 2.66    | 0.28    | 0       | 0       |
| Livestock                                        | 8.7    | 12.97   | 1.08    | 0       | 0       |
| Oil crops                                        | 4.71   | 9.28    | 1.04    | 0       | 0       |
| Pulses                                           | 25.22  | 48.13   | 5.26    | 0.02    | 0       |
| Roots & tubers                                   | 63.52  | 113.71  | 11.63   | 0.05    | 0       |
| Sugar crops                                      | 0      | 0       | 0       | 0       | 0       |
| Vegetables                                       | 0.21   | 0.31    | 0.03    | 0       | 0       |
| <b>Trinidad and Tobago</b>                       |        |         |         |         |         |
| Cereals                                          | 0      | 0.05    | 0.19    | 0.18    | 0.3     |
| Fiber                                            | 0      | 0       | 0       | 0       | 0       |
| Fruit                                            | 0      | 0.12    | 0.49    | 0.47    | 0.76    |
| Livestock                                        | 0      | 0       | 0       | 0       | 0       |
| Oil crops                                        | 0      | 0.09    | 0.35    | 0.33    | 0.54    |
| Pulses                                           | 0      | 0       | 0.02    | 0.02    | 0.03    |
| Roots & tubers                                   | 0      | 0.02    | 0.07    | 0.06    | 0.1     |
| Sugar crops                                      | 0      | 0.46    | 1.85    | 1.76    | 2.89    |
| Vegetables                                       | 0      | 0.01    | 0.06    | 0.05    | 0.09    |
| <b>Tunisia</b>                                   |        |         |         |         |         |
| Cereals                                          | 70.56  | 287.18  | 91.38   | 91.35   | 110.8   |
| Fiber                                            | 0.22   | 0.95    | 0.32    | 0.33    | 0.42    |
| Fruit                                            | 20.96  | 63.09   | 15.73   | 12.57   | 12.84   |
| Livestock                                        | 132.93 | 631.63  | 218.65  | 154.19  | 112.51  |
| Oil crops                                        | 67.6   | 332.65  | 116.57  | 118.09  | 141.75  |
| Pulses                                           | 0.84   | 3.69    | 1.23    | 1.3     | 1.65    |
| Roots & tubers                                   | 3.68   | 12.31   | 3.3     | 4.55    | 6.92    |
| Sugar crops                                      | 0      | 0       | 0       | 0       | 0       |
| Vegetables                                       | 7.41   | 34.43   | 11.89   | 21.95   | 37.51   |
| <b>Turkey</b>                                    |        |         |         |         |         |
| Cereals                                          | 1514.3 | 4916.6  | 1310.91 | 1131.28 | 1226.41 |
| Fiber                                            | 316.82 | 1177.61 | 363.56  | 266.77  | 233.57  |
| Fruit                                            | 158.77 | 474.84  | 114.26  | 97.31   | 104.53  |

|                             |         |         |         |         |         |
|-----------------------------|---------|---------|---------|---------|---------|
| Livestock                   | 2186.69 | 7791.36 | 2239.65 | 1575.42 | 1218.02 |
| Oil crops                   | 272.97  | 892.72  | 239.05  | 176.82  | 154.78  |
| Pulses                      | 41.02   | 131.99  | 34.82   | 22.21   | 14.53   |
| Roots & tubers              | 86.77   | 212.44  | 37.9    | 24.72   | 20.17   |
| Sugar crops                 | 359.88  | 962.3   | 198.46  | 123.45  | 82.68   |
| Vegetables                  | 221.39  | 673.62  | 166.5   | 124.37  | 112.52  |
| <b>Turkmenistan</b>         |         |         |         |         |         |
| Cereals                     | 21.65   | 361.99  | 170.12  | 210.98  | 289     |
| Fiber                       | 18.17   | 301.32  | 141.5   | 177.41  | 244.89  |
| Fruit                       | 0.68    | 11.27   | 5.29    | 6.63    | 9.15    |
| Livestock                   | 46.15   | 689.76  | 321.04  | 423.21  | 604.61  |
| Oil crops                   | 0       | 0       | 0       | 0       | 0       |
| Pulses                      | 0.09    | 1.44    | 0.68    | 0.85    | 1.17    |
| Roots & tubers              | 0.32    | 6.96    | 3.33    | 3.61    | 4.43    |
| Sugar crops                 | 0.62    | 9.86    | 4.61    | 5.74    | 7.88    |
| Vegetables                  | 0.97    | 16.09   | 7.55    | 9.47    | 13.07   |
| <b>Uganda</b>               |         |         |         |         |         |
| Cereals                     | 77.15   | 131.52  | 12.91   | 0.05    | 0       |
| Fiber                       | 19.08   | 37.69   | 4.21    | 0.02    | 0       |
| Fruit                       | 63.23   | 119.69  | 12.94   | 0.06    | 0       |
| Livestock                   | 307.06  | 872.75  | 119.13  | 0.64    | 0       |
| Oil crops                   | 888.35  | 1177.29 | 85.64   | 0.18    | 0       |
| Pulses                      | 192.31  | 343.9   | 35.66   | 0.14    | 0       |
| Roots & tubers              | 412.8   | 814.06  | 89.67   | 0.41    | 0       |
| Sugar crops                 | 7.65    | 14.59   | 1.59    | 0.01    | 0       |
| Vegetables                  | 13.66   | 26.07   | 2.84    | 0.01    | 0       |
| <b>Ukraine</b>              |         |         |         |         |         |
| Cereals                     | 666.38  | 2590.35 | 1129.83 | 3456.2  | 1241.94 |
| Fiber                       | 0       | 0       | 0       | 0       | 0       |
| Fruit                       | 4.92    | 19.34   | 8.57    | 28.03   | 10.64   |
| Livestock                   | 1251.76 | 4837.82 | 2075.34 | 5997.74 | 2067.83 |
| Oil crops                   | 412.84  | 1623.89 | 716.59  | 2252.99 | 831.54  |
| Pulses                      | 10.8    | 51.55   | 29.57   | 104.8   | 39      |
| Roots & tubers              | 112.05  | 489.34  | 247.89  | 683.06  | 208.58  |
| Sugar crops                 | 114.03  | 516.95  | 275.04  | 972.85  | 374.34  |
| Vegetables                  | 21.33   | 82.11   | 35.32   | 117.58  | 45.61   |
| <b>United Arab Emirates</b> |         |         |         |         |         |
| Cereals                     | 0       | 0.01    | 0       | 0       | 0       |
| Fiber                       | 0       | 0       | 0       | 0       | 0       |
| Fruit                       | 53.61   | 247.97  | 91.98   | 44.62   | 7.91    |
| Livestock                   | 1.4     | 6.5     | 2.41    | 1.17    | 0.21    |
| Oil crops                   | 0       | 0       | 0       | 0       | 0       |
| Pulses                      | 0       | 0       | 0       | 0       | 0       |
| Roots & tubers              | 0.08    | 0.35    | 0.13    | 0.06    | 0.01    |
| Sugar crops                 | 0       | 0       | 0       | 0       | 0       |
| Vegetables                  | 1.22    | 5.64    | 2.09    | 1.02    | 0.18    |

**United Kingdom**

|                |        |         |         |         |         |
|----------------|--------|---------|---------|---------|---------|
| Cereals        | 344.16 | 1702.21 | 979.5   | 2962.75 | 969.26  |
| Fiber          | 0      | 0       | 0       | 0       | 0       |
| Fruit          | 0.3    | 2.53    | 1.98    | 6.38    | 2.1     |
| Livestock      | 726.74 | 4890.12 | 3224.51 | 7164.45 | 1559.36 |
| Oil crops      | 283.66 | 1378.99 | 783.66  | 2285.23 | 716.27  |
| Pulses         | 4.64   | 39.21   | 30.67   | 98.69   | 32.53   |
| Roots & tubers | 9.97   | 91.84   | 75.59   | 258.57  | 88.37   |
| Sugar crops    | 16.27  | 152.19  | 126.35  | 469.42  | 172.9   |
| Vegetables     | 1.85   | 15.6    | 12.2    | 39.25   | 12.94   |

**United Republic of Tanzania**

|                |        |         |        |      |   |
|----------------|--------|---------|--------|------|---|
| Cereals        | 195.6  | 429.39  | 51.15  | 0.25 | 0 |
| Fiber          | 55.18  | 153.39  | 20.82  | 0.11 | 0 |
| Fruit          | 30.8   | 102.93  | 14.92  | 0.08 | 0 |
| Livestock      | 600.74 | 1179.99 | 128.16 | 0.58 | 0 |
| Oil crops      | 277.81 | 762.02  | 102.67 | 0.54 | 0 |
| Pulses         | 314.37 | 596.8   | 63.51  | 0.28 | 0 |
| Roots & tubers | 260.31 | 750.17  | 103.55 | 0.55 | 0 |
| Sugar crops    | 5.27   | 16.45   | 2.34   | 0.01 | 0 |
| Vegetables     | 4.85   | 14.19   | 1.96   | 0.01 | 0 |

**United States of America**

|                |       |         |          |          |          |
|----------------|-------|---------|----------|----------|----------|
| Cereals        | 3.67  | 1684.6  | 3469.68  | 16273.88 | 16708.33 |
| Fiber          | 0.58  | 411.54  | 974.55   | 4940.39  | 5236.18  |
| Fruit          | 1.19  | 264.63  | 386.05   | 1201.5   | 1363.18  |
| Livestock      | 18.13 | 6842.56 | 12651.95 | 46950.74 | 37255.05 |
| Oil crops      | 13.79 | 8864.11 | 20464.64 | 98445.59 | 99401.73 |
| Pulses         | 0.15  | 76.52   | 163.8    | 746.28   | 722.61   |
| Roots & tubers | 0.44  | 164.82  | 288.39   | 935.9    | 556.14   |
| Sugar crops    | 0.09  | 103.83  | 283.54   | 1698.15  | 2030.13  |
| Vegetables     | 0.24  | 108.56  | 214.67   | 848.13   | 695.53   |

**Uruguay**

|                |      |       |       |        |         |
|----------------|------|-------|-------|--------|---------|
| Cereals        | 0.65 | 15.37 | 24.24 | 104.8  | 545.88  |
| Fiber          | 0    | 0     | 0     | 0      | 0       |
| Fruit          | 0.11 | 2.49  | 3.91  | 14.22  | 44.58   |
| Livestock      | 2.31 | 55.64 | 88.74 | 360.6  | 1568.66 |
| Oil crops      | 0.66 | 17.08 | 28.36 | 188.83 | 1655.54 |
| Pulses         | 0.01 | 0.18  | 0.29  | 1.08   | 3.81    |
| Roots & tubers | 0.03 | 0.74  | 1.22  | 5.01   | 20.42   |
| Sugar crops    | 0    | 0     | 0     | 0.12   | 1.91    |
| Vegetables     | 0.01 | 0.27  | 0.44  | 1.85   | 7.77    |

**Uzbekistan**

|           |        |         |         |        |        |
|-----------|--------|---------|---------|--------|--------|
| Cereals   | 158.5  | 945.73  | 367.25  | 339.36 | 374.35 |
| Fiber     | 267.1  | 1593.49 | 618.76  | 571.71 | 630.58 |
| Fruit     | 7.27   | 43.27   | 16.79   | 15.54  | 17.16  |
| Livestock | 362.97 | 2839.76 | 1188.83 | 862.7  | 644.89 |
| Oil crops | 3.37   | 20.09   | 7.8     | 7.11   | 7.73   |



|                                           |         |         |        |         |         |
|-------------------------------------------|---------|---------|--------|---------|---------|
| Pulses                                    | 0.2     | 1.12    | 0.43   | 0.38    | 0.4     |
| Roots & tubers                            | 6.86    | 40.63   | 15.74  | 14.59   | 16.17   |
| Sugar crops                               | 0       | 0       | 0      | 0       | 0       |
| Vegetables                                | 18.85   | 112.02  | 43.45  | 40.2    | 44.44   |
| <b>Venezuela (Bolivarian Republic of)</b> |         |         |        |         |         |
| Cereals                                   | 1.37    | 24.91   | 29.71  | 83.9    | 325.16  |
| Fiber                                     | 0.11    | 1.83    | 2      | 4.7     | 16.03   |
| Fruit                                     | 0.71    | 12.23   | 13.45  | 31.56   | 103.22  |
| Livestock                                 | 7.02    | 121.95  | 136.39 | 352.28  | 1415.54 |
| Oil crops                                 | 1.72    | 29.3    | 31.98  | 74.83   | 257.73  |
| Pulses                                    | 0.28    | 4.65    | 4.78   | 9.19    | 23.4    |
| Roots & tubers                            | 0.49    | 8.32    | 9.15   | 22.1    | 80.34   |
| Sugar crops                               | 0.43    | 7.3     | 7.99   | 18.75   | 63.7    |
| Vegetables                                | 0.31    | 5.36    | 5.87   | 13.78   | 46.98   |
| <b>Viet Nam</b>                           |         |         |        |         |         |
| Cereals                                   | 1366.17 | 5350.96 | 522.36 | 2989.49 | 0       |
| Fiber                                     | 6.42    | 14.72   | 1.06   | 3.86    | 0       |
| Fruit                                     | 69.28   | 158.96  | 11.43  | 36.8    | 0       |
| Livestock                                 | 221.52  | 350.6   | 14.94  | 116.22  | 0       |
| Oil crops                                 | 270.69  | 646.68  | 49.31  | 101.44  | 0       |
| Pulses                                    | 67.8    | 146.32  | 10.17  | 13.86   | 0       |
| Roots & tubers                            | 442.61  | 801.83  | 44.54  | 73.56   | 0       |
| Sugar crops                               | 31.09   | 90.68   | 7.7    | 34.07   | 0       |
| Vegetables                                | 13.6    | 31.75   | 2.32   | 6.89    | 0       |
| <b>Yemen</b>                              |         |         |        |         |         |
| Cereals                                   | 16.58   | 75.95   | 25.95  | 13.4    | 2.29    |
| Fiber                                     | 3.19    | 12.55   | 3.9    | 1.99    | 0.34    |
| Fruit                                     | 8.52    | 40.92   | 14.26  | 7.42    | 1.26    |
| Livestock                                 | 114.51  | 261.81  | 40.82  | 17.38   | 2.72    |
| Oil crops                                 | 33.52   | 120.67  | 35.01  | 17.66   | 2.98    |
| Pulses                                    | 1.08    | 4.27    | 1.33   | 0.68    | 0.11    |
| Roots & tubers                            | 2.77    | 11.87   | 3.88   | 2       | 0.34    |
| Sugar crops                               | 0       | 0       | 0      | 0       | 0       |
| Vegetables                                | 6.08    | 31.96   | 11.67  | 6.09    | 1.04    |
| <b>Zambia</b>                             |         |         |        |         |         |
| Cereals                                   | 25.24   | 60.08   | 7.67   | 12.61   | 0       |
| Fiber                                     | 16.37   | 44.26   | 6.05   | 66.85   | 0       |
| Fruit                                     | 0.33    | 0.54    | 0.05   | 0.1     | 0       |
| Livestock                                 | 42.01   | 65.98   | 5.91   | 15.55   | 0       |
| Oil crops                                 | 35.84   | 121.92  | 18     | 15.87   | 0       |
| Pulses                                    | 2.09    | 3.48    | 0.34   | 0.8     | 0       |
| Roots & tubers                            | 61.68   | 87.98   | 6.65   | 4.79    | 0       |
| Sugar crops                               | 7.52    | 12.36   | 1.18   | 2.88    | 0       |
| Vegetables                                | 2.47    | 4.06    | 0.39   | 0.95    | 0       |
| <b>Zimbabwe</b>                           |         |         |        |         |         |

|                |       |        |       |      |   |
|----------------|-------|--------|-------|------|---|
| Cereals        | 27.3  | 103.61 | 15.8  | 5.41 | 0 |
| Fiber          | 24.93 | 149.27 | 25.07 | 13.8 | 0 |
| Fruit          | 2.25  | 24.95  | 4.5   | 0.33 | 0 |
| Livestock      | 168.7 | 293.58 | 29.89 | 0.23 | 0 |
| Oil crops      | 62.59 | 143.03 | 17.89 | 7.64 | 0 |
| Pulses         | 6.61  | 24.61  | 3.74  | 0.78 | 0 |
| Roots & tubers | 9.88  | 18.58  | 2.04  | 1.42 | 0 |
| Sugar crops    | 8.66  | 20.45  | 2.6   | 1.98 | 0 |
| Vegetables     | 0.03  | 1.86   | 0.36  | 0.01 | 0 |

#### Folate production (T)

|                    | < 2 ha | 2 - 20 ha | 20 - 50 ha | 50 - 200 ha | > 200 ha |
|--------------------|--------|-----------|------------|-------------|----------|
| <b>Afghanistan</b> |        |           |            |             |          |
| Cereals            | 0.4    | 0.98      | 0.13       | 0.42        | 0        |
| Fiber              | 0      | 0.06      | 0.01       | 0           | 0        |
| Fruit              | 0      | 0.01      | 0          | 0           | 0        |
| Livestock          | 0.04   | 0.06      | 0.01       | 0           | 0        |
| Oil crops          | 0.02   | 0.03      | 0          | 0           | 0        |
| Pulses             | 0.01   | 0.01      | 0          | 0           | 0        |
| Roots & tubers     | 0.01   | 0.02      | 0          | 0           | 0        |
| Sugar crops        | 0      | 0         | 0          | 0           | 0        |
| Vegetables         | 0      | 0         | 0          | 0           | 0        |
| <b>Albania</b>     |        |           |            |             |          |
| Cereals            | 0.03   | 0.09      | 0.02       | 0.02        | 0        |
| Fiber              | 0      | 0         | 0          | 0           | 0        |
| Fruit              | 0      | 0         | 0          | 0           | 0        |
| Livestock          | 0.01   | 0.04      | 0.01       | 0.01        | 0        |
| Oil crops          | 0      | 0         | 0          | 0           | 0        |
| Pulses             | 0.02   | 0.05      | 0.01       | 0.01        | 0        |
| Roots & tubers     | 0      | 0.01      | 0          | 0           | 0        |
| Sugar crops        | 0.01   | 0.02      | 0          | 0           | 0        |
| Vegetables         | 0.01   | 0.02      | 0          | 0           | 0        |
| <b>Algeria</b>     |        |           |            |             |          |
| Cereals            | 0.15   | 0.56      | 0.17       | 0.19        | 0.26     |
| Fiber              | 0      | 0         | 0          | 0           | 0        |
| Fruit              | 0.02   | 0.1       | 0.03       | 0.02        | 0.01     |
| Livestock          | 0.02   | 0.1       | 0.03       | 0.03        | 0.02     |
| Oil crops          | 0.01   | 0.04      | 0.01       | 0.02        | 0.02     |
| Pulses             | 0      | 0.01      | 0          | 0           | 0        |
| Roots & tubers     | 0.03   | 0.11      | 0.03       | 0.03        | 0.04     |
| Sugar crops        | 0      | 0         | 0          | 0           | 0        |
| Vegetables         | 0.03   | 0.12      | 0.04       | 0.03        | 0.02     |
| <b>Angola</b>      |        |           |            |             |          |
| Cereals            | 0.07   | 0.14      | 0.02       | 0.01        | 0        |
| Fiber              | 0      | 0.01      | 0          | 0           | 0        |

|                  |      |      |      |       |        |
|------------------|------|------|------|-------|--------|
| Fruit            | 0.05 | 0.09 | 0.01 | 0.01  | 0      |
| Livestock        | 0.01 | 0.01 | 0    | 0     | 0      |
| Oil crops        | 0.01 | 0.02 | 0    | 0     | 0      |
| Pulses           | 0.1  | 0.23 | 0.03 | 0.03  | 0      |
| Roots & tubers   | 0.56 | 1.34 | 0.17 | 0.12  | 0      |
| Sugar crops      | 0    | 0    | 0    | 0     | 0      |
| Vegetables       | 0    | 0    | 0    | 0     | 0      |
| <b>Argentina</b> |      |      |      |       |        |
| Cereals          | 0.01 | 0.14 | 0.23 | 1.28  | 9.34   |
| Fiber            | 0    | 0.05 | 0.06 | 0.15  | 0.83   |
| Fruit            | 0    | 0.01 | 0.01 | 0.04  | 0.26   |
| Livestock        | 0    | 0.06 | 0.06 | 0.14  | 0.6    |
| Oil crops        | 0.06 | 1.71 | 2.92 | 17.77 | 139.94 |
| Pulses           | 0    | 0.04 | 0.06 | 0.23  | 0.88   |
| Roots & tubers   | 0    | 0.02 | 0.02 | 0.07  | 0.19   |
| Sugar crops      | 0    | 0    | 0    | 0     | 0      |
| Vegetables       | 0    | 0    | 0.01 | 0.03  | 0.18   |
| <b>Armenia</b>   |      |      |      |       |        |
| Cereals          | 0.01 | 0.07 | 0.03 | 0.01  | 0      |
| Fiber            | 0    | 0    | 0    | 0     | 0      |
| Fruit            | 0    | 0    | 0    | 0     | 0      |
| Livestock        | 0    | 0.03 | 0.01 | 0     | 0      |
| Oil crops        | 0    | 0    | 0    | 0     | 0      |
| Pulses           | 0    | 0.01 | 0    | 0     | 0      |
| Roots & tubers   | 0.01 | 0.04 | 0.02 | 0.01  | 0      |
| Sugar crops      | 0    | 0.01 | 0    | 0     | 0      |
| Vegetables       | 0    | 0.03 | 0.01 | 0.01  | 0      |
| <b>Australia</b> |      |      |      |       |        |
| Cereals          | 0    | 0.02 | 0.07 | 0.68  | 8.89   |
| Fiber            | 0    | 0    | 0.02 | 0.15  | 2.69   |
| Fruit            | 0    | 0    | 0    | 0.01  | 0.18   |
| Livestock        | 0    | 0    | 0.01 | 0.06  | 0.7    |
| Oil crops        | 0    | 0.01 | 0.04 | 0.37  | 3.86   |
| Pulses           | 0    | 0    | 0.01 | 0.05  | 1      |
| Roots & tubers   | 0    | 0    | 0    | 0.02  | 0.14   |
| Sugar crops      | 0    | 0    | 0    | 0     | 0      |
| Vegetables       | 0    | 0    | 0    | 0.01  | 0.08   |
| <b>Austria</b>   |      |      |      |       |        |
| Cereals          | 0.12 | 0.47 | 0.22 | 0.39  | 0.05   |
| Fiber            | 0    | 0    | 0    | 0     | 0      |
| Fruit            | 0    | 0.01 | 0    | 0.01  | 0      |
| Livestock        | 0.01 | 0.07 | 0.05 | 0.09  | 0.01   |
| Oil crops        | 0.08 | 0.32 | 0.13 | 0.23  | 0.03   |
| Pulses           | 0.02 | 0.08 | 0.04 | 0.07  | 0.01   |
| Roots & tubers   | 0.01 | 0.04 | 0.01 | 0.02  | 0      |
| Sugar crops      | 0.27 | 0.98 | 0.37 | 0.61  | 0.07   |

|                   |      |      |      |      |      |
|-------------------|------|------|------|------|------|
| Vegetables        | 0    | 0.01 | 0    | 0.01 | 0    |
| <b>Azerbaijan</b> |      |      |      |      |      |
| Cereals           | 0.11 | 0.36 | 0.1  | 0.08 | 0.08 |
| Fiber             | 0.05 | 0.16 | 0.04 | 0.04 | 0.04 |
| Fruit             | 0    | 0    | 0    | 0    | 0    |
| Livestock         | 0.01 | 0.05 | 0.01 | 0.01 | 0.01 |
| Oil crops         | 0    | 0.01 | 0    | 0    | 0    |
| Pulses            | 0.01 | 0.03 | 0.01 | 0.01 | 0    |
| Roots & tubers    | 0.02 | 0.06 | 0.02 | 0.01 | 0.01 |
| Sugar crops       | 0.01 | 0.05 | 0.01 | 0.01 | 0.01 |
| Vegetables        | 0.02 | 0.05 | 0.01 | 0.01 | 0.01 |
| <b>Bangladesh</b> |      |      |      |      |      |
| Cereals           | 0.96 | 2.07 | 0.25 | 0.5  | 0    |
| Fiber             | 0.03 | 0.07 | 0.01 | 0.01 | 0    |
| Fruit             | 0.04 | 0.08 | 0.01 | 0.02 | 0    |
| Livestock         | 0.08 | 0.15 | 0.02 | 0.02 | 0    |
| Oil crops         | 0.19 | 0.56 | 0.08 | 0.12 | 0    |
| Pulses            | 0.06 | 0.14 | 0.02 | 0.04 | 0    |
| Roots & tubers    | 0.16 | 0.33 | 0.04 | 0.12 | 0    |
| Sugar crops       | 0    | 0    | 0    | 0    | 0    |
| Vegetables        | 0.04 | 0.08 | 0.01 | 0.02 | 0    |
| <b>Belarus</b>    |      |      |      |      |      |
| Cereals           | 0.14 | 0.52 | 0.22 | 0.63 | 0.22 |
| Fiber             | 0    | 0    | 0    | 0    | 0    |
| Fruit             | 0    | 0    | 0    | 0    | 0    |
| Livestock         | 0.03 | 0.1  | 0.05 | 0.16 | 0.06 |
| Oil crops         | 0.05 | 0.2  | 0.08 | 0.24 | 0.08 |
| Pulses            | 0.04 | 0.15 | 0.06 | 0.18 | 0.06 |
| Roots & tubers    | 0.02 | 0.17 | 0.14 | 0.5  | 0.19 |
| Sugar crops       | 0.05 | 0.47 | 0.39 | 1.51 | 0.58 |
| Vegetables        | 0.01 | 0.02 | 0.01 | 0.02 | 0.01 |
| <b>Belgium</b>    |      |      |      |      |      |
| Cereals           | 0.06 | 0.25 | 0.11 | 0.36 | 0.14 |
| Fiber             | 0    | 0    | 0    | 0    | 0    |
| Fruit             | 0    | 0    | 0    | 0    | 0    |
| Livestock         | 0.02 | 0.09 | 0.04 | 0.1  | 0.03 |
| Oil crops         | 0    | 0.01 | 0.01 | 0.07 | 0.04 |
| Pulses            | 0    | 0    | 0    | 0    | 0    |
| Roots & tubers    | 0.05 | 0.15 | 0.05 | 0.08 | 0.02 |
| Sugar crops       | 0.3  | 1.24 | 0.61 | 1.99 | 0.73 |
| Vegetables        | 0    | 0.01 | 0.01 | 0.01 | 0    |
| <b>Belize</b>     |      |      |      |      |      |
| Cereals           | 0    | 0    | 0    | 0    | 0    |
| Fiber             | 0    | 0    | 0    | 0    | 0    |
| Fruit             | 0    | 0.01 | 0.03 | 0.01 | 0.01 |
| Livestock         | 0    | 0    | 0    | 0    | 0    |

|                                         |      |      |      |      |      |
|-----------------------------------------|------|------|------|------|------|
| Oil crops                               | 0    | 0    | 0    | 0    | 0    |
| Pulses                                  | 0    | 0    | 0.01 | 0    | 0    |
| Roots & tubers                          | 0    | 0    | 0    | 0    | 0    |
| Sugar crops                             | 0    | 0    | 0    | 0    | 0    |
| Vegetables                              | 0    | 0    | 0    | 0    | 0    |
| <b>Benin</b>                            |      |      |      |      |      |
| Cereals                                 | 0.08 | 0.13 | 0.01 | 0    | 0    |
| Fiber                                   | 0.13 | 0.42 | 0.06 | 0    | 0    |
| Fruit                                   | 0.01 | 0.01 | 0    | 0    | 0    |
| Livestock                               | 0    | 0    | 0    | 0    | 0    |
| Oil crops                               | 0.02 | 0.03 | 0    | 0    | 0    |
| Pulses                                  | 0.15 | 0.26 | 0.03 | 0    | 0    |
| Roots & tubers                          | 0.45 | 0.57 | 0.04 | 0    | 0    |
| Sugar crops                             | 0    | 0    | 0    | 0    | 0    |
| Vegetables                              | 0.01 | 0.01 | 0    | 0    | 0    |
| <b>Bhutan</b>                           |      |      |      |      |      |
| Cereals                                 | 0.01 | 0.02 | 0    | 0    | 0    |
| Fiber                                   | 0    | 0    | 0    | 0    | 0    |
| Fruit                                   | 0    | 0.01 | 0    | 0    | 0    |
| Livestock                               | 0    | 0    | 0    | 0    | 0    |
| Oil crops                               | 0    | 0    | 0    | 0    | 0    |
| Pulses                                  | 0.01 | 0.01 | 0    | 0    | 0    |
| Roots & tubers                          | 0    | 0    | 0    | 0    | 0    |
| Sugar crops                             | 0    | 0    | 0    | 0    | 0    |
| Vegetables                              | 0    | 0    | 0    | 0    | 0    |
| <b>Bolivia (Plurinational State of)</b> |      |      |      |      |      |
| Cereals                                 | 0    | 0.03 | 0.03 | 0.06 | 0.2  |
| Fiber                                   | 0    | 0.01 | 0.01 | 0.04 | 0.19 |
| Fruit                                   | 0    | 0.02 | 0.02 | 0.03 | 0.04 |
| Livestock                               | 0    | 0.01 | 0.01 | 0.02 | 0.03 |
| Oil crops                               | 0    | 0.12 | 0.18 | 0.85 | 5.13 |
| Pulses                                  | 0    | 0.02 | 0.02 | 0.03 | 0.08 |
| Roots & tubers                          | 0    | 0.03 | 0.03 | 0.04 | 0.06 |
| Sugar crops                             | 0    | 0    | 0    | 0    | 0    |
| Vegetables                              | 0    | 0    | 0    | 0    | 0.01 |
| <b>Bosnia and Herzegovina</b>           |      |      |      |      |      |
| Cereals                                 | 0.03 | 0.12 | 0.05 | 0.09 | 0.01 |
| Fiber                                   | 0    | 0    | 0    | 0    | 0    |
| Fruit                                   | 0    | 0    | 0    | 0    | 0    |
| Livestock                               | 0    | 0.02 | 0.01 | 0.01 | 0    |
| Oil crops                               | 0    | 0.02 | 0.01 | 0.02 | 0    |
| Pulses                                  | 0.01 | 0.03 | 0.01 | 0.02 | 0    |
| Roots & tubers                          | 0.01 | 0.02 | 0.01 | 0.02 | 0    |
| Sugar crops                             | 0    | 0    | 0    | 0    | 0    |
| Vegetables                              | 0    | 0    | 0    | 0    | 0    |

**Botswana**

|                |   |      |   |   |   |
|----------------|---|------|---|---|---|
| Cereals        | 0 | 0    | 0 | 0 | 0 |
| Fiber          | 0 | 0    | 0 | 0 | 0 |
| Fruit          | 0 | 0    | 0 | 0 | 0 |
| Livestock      | 0 | 0.01 | 0 | 0 | 0 |
| Oil crops      | 0 | 0    | 0 | 0 | 0 |
| Pulses         | 0 | 0    | 0 | 0 | 0 |
| Roots & tubers | 0 | 0    | 0 | 0 | 0 |
| Sugar crops    | 0 | 0    | 0 | 0 | 0 |
| Vegetables     | 0 | 0    | 0 | 0 | 0 |

**Brazil**

|                |      |      |      |       |       |
|----------------|------|------|------|-------|-------|
| Cereals        | 0.02 | 0.42 | 0.48 | 1.52  | 9.03  |
| Fiber          | 0    | 0.07 | 0.12 | 0.86  | 7.24  |
| Fruit          | 0.04 | 0.59 | 0.55 | 0.88  | 3.09  |
| Livestock      | 0.02 | 0.26 | 0.26 | 0.52  | 1.81  |
| Oil crops      | 0.06 | 1.59 | 2.74 | 19.68 | 178.5 |
| Pulses         | 0.12 | 1.88 | 1.75 | 2.54  | 6.38  |
| Roots & tubers | 0.06 | 0.92 | 0.88 | 1.38  | 3.24  |
| Sugar crops    | 0    | 0    | 0    | 0     | 0     |
| Vegetables     | 0    | 0.07 | 0.07 | 0.13  | 0.4   |

**Brunei Darussalam**

|                |   |   |   |   |   |
|----------------|---|---|---|---|---|
| Cereals        | 0 | 0 | 0 | 0 | 0 |
| Fiber          | 0 | 0 | 0 | 0 | 0 |
| Fruit          | 0 | 0 | 0 | 0 | 0 |
| Livestock      | 0 | 0 | 0 | 0 | 0 |
| Oil crops      | 0 | 0 | 0 | 0 | 0 |
| Pulses         | 0 | 0 | 0 | 0 | 0 |
| Roots & tubers | 0 | 0 | 0 | 0 | 0 |
| Sugar crops    | 0 | 0 | 0 | 0 | 0 |
| Vegetables     | 0 | 0 | 0 | 0 | 0 |

**Bulgaria**

|                |      |      |      |      |      |
|----------------|------|------|------|------|------|
| Cereals        | 0.06 | 0.34 | 0.22 | 0.77 | 0.28 |
| Fiber          | 0    | 0    | 0    | 0    | 0    |
| Fruit          | 0    | 0    | 0    | 0    | 0    |
| Livestock      | 0.01 | 0.04 | 0.02 | 0.04 | 0.01 |
| Oil crops      | 0.02 | 0.19 | 0.15 | 0.65 | 0.27 |
| Pulses         | 0    | 0.01 | 0    | 0.02 | 0.01 |
| Roots & tubers | 0    | 0.01 | 0.01 | 0.02 | 0    |
| Sugar crops    | 0    | 0    | 0    | 0.01 | 0    |
| Vegetables     | 0    | 0.01 | 0    | 0.01 | 0    |

**Burkina Faso**

|           |      |      |      |      |   |
|-----------|------|------|------|------|---|
| Cereals   | 0.39 | 0.76 | 0.08 | 0.17 | 0 |
| Fiber     | 0.38 | 0.7  | 0.08 | 0.28 | 0 |
| Fruit     | 0    | 0    | 0    | 0    | 0 |
| Livestock | 0.02 | 0.02 | 0    | 0    | 0 |
| Oil crops | 0.01 | 0.02 | 0    | 0.01 | 0 |

|                                 |      |      |      |      |       |
|---------------------------------|------|------|------|------|-------|
| Pulses                          | 0.01 | 0.01 | 0    | 0    | 0     |
| Roots & tubers                  | 0    | 0    | 0    | 0    | 0     |
| Sugar crops                     | 0    | 0    | 0    | 0    | 0     |
| Vegetables                      | 0    | 0    | 0    | 0    | 0     |
| <b>Burundi</b>                  |      |      |      |      |       |
| Cereals                         | 0.03 | 0.03 | 0    | 0    | 0     |
| Fiber                           | 0.01 | 0.01 | 0    | 0    | 0     |
| Fruit                           | 0.09 | 0.11 | 0.01 | 0    | 0     |
| Livestock                       | 0    | 0    | 0    | 0    | 0     |
| Oil crops                       | 0    | 0.01 | 0    | 0    | 0     |
| Pulses                          | 0.4  | 0.49 | 0.02 | 0    | 0     |
| Roots & tubers                  | 0.09 | 0.11 | 0.01 | 0    | 0     |
| Sugar crops                     | 0    | 0    | 0    | 0    | 0     |
| Vegetables                      | 0    | 0    | 0    | 0    | 0     |
| <b>Cambodia</b>                 |      |      |      |      |       |
| Cereals                         | 0.17 | 0.38 | 0.03 | 0.01 | 0     |
| Fiber                           | 0    | 0    | 0    | 0    | 0     |
| Fruit                           | 0.01 | 0.02 | 0    | 0    | 0     |
| Livestock                       | 0.01 | 0.01 | 0    | 0    | 0     |
| Oil crops                       | 0.2  | 0.33 | 0.02 | 0.01 | 0     |
| Pulses                          | 0.08 | 0.13 | 0.01 | 0    | 0     |
| Roots & tubers                  | 0.13 | 0.23 | 0.01 | 0    | 0     |
| Sugar crops                     | 0    | 0    | 0    | 0    | 0     |
| Vegetables                      | 0    | 0    | 0    | 0    | 0     |
| <b>Cameroon</b>                 |      |      |      |      |       |
| Cereals                         | 0.17 | 0.26 | 0.02 | 0.02 | 0     |
| Fiber                           | 0.23 | 0.39 | 0.04 | 0.01 | 0     |
| Fruit                           | 0.15 | 0.24 | 0.02 | 0.03 | 0     |
| Livestock                       | 0.01 | 0.01 | 0    | 0    | 0     |
| Oil crops                       | 0.01 | 0.02 | 0    | 0    | 0     |
| Pulses                          | 0.43 | 0.52 | 0.03 | 0    | 0     |
| Roots & tubers                  | 0.19 | 0.34 | 0.03 | 0.13 | 0     |
| Sugar crops                     | 0    | 0    | 0    | 0    | 0     |
| Vegetables                      | 0.03 | 0.05 | 0    | 0    | 0     |
| <b>Canada</b>                   |      |      |      |      |       |
| Cereals                         | 0.01 | 1.25 | 1.98 | 6.4  | 6.85  |
| Fiber                           | 0    | 0    | 0    | 0    | 0     |
| Fruit                           | 0    | 0    | 0    | 0.01 | 0     |
| Livestock                       | 0    | 0.09 | 0.14 | 0.32 | 0.18  |
| Oil crops                       | 0.02 | 4.27 | 6.55 | 18.2 | 17.86 |
| Pulses                          | 0    | 0.7  | 1.09 | 3.43 | 3.76  |
| Roots & tubers                  | 0    | 0.07 | 0.11 | 0.25 | 0.15  |
| Sugar crops                     | 0    | 0.02 | 0.03 | 0.22 | 0.37  |
| Vegetables                      | 0    | 0.01 | 0.02 | 0.07 | 0.04  |
| <b>Central African Republic</b> |      |      |      |      |       |

|                 |       |       |      |       |      |
|-----------------|-------|-------|------|-------|------|
| Cereals         | 0.02  | 0.03  | 0    | 0     | 0    |
| Fiber           | 0     | 0     | 0    | 0     | 0    |
| Fruit           | 0.01  | 0.02  | 0    | 0     | 0    |
| Oil crops       | 0.02  | 0.02  | 0    | 0     | 0    |
| Pulses          | 0.01  | 0.01  | 0    | 0     | 0    |
| Roots & tubers  | 0.09  | 0.11  | 0.01 | 0     | 0    |
| Sugar crops     | 0     | 0     | 0    | 0     | 0    |
| Vegetables      | 0     | 0     | 0    | 0     | 0    |
| <b>Chad</b>     |       |       |      |       |      |
| Cereals         | 0.22  | 0.4   | 0.04 | 0.2   | 0    |
| Fiber           | 0.1   | 0.19  | 0.02 | 0.03  | 0    |
| Fruit           | 0     | 0     | 0    | 0     | 0    |
| Livestock       | 0.01  | 0.01  | 0    | 0     | 0    |
| Oil crops       | 0.01  | 0.02  | 0    | 0     | 0    |
| Pulses          | 0.1   | 0.18  | 0.02 | 0.06  | 0    |
| Roots & tubers  | 0.04  | 0.07  | 0.01 | 0.02  | 0    |
| Sugar crops     | 0     | 0     | 0    | 0     | 0    |
| Vegetables      | 0     | 0     | 0    | 0     | 0    |
| <b>Chile</b>    |       |       |      |       |      |
| Cereals         | 0.01  | 0.1   | 0.1  | 0.21  | 0.7  |
| Fiber           | 0     | 0     | 0    | 0     | 0    |
| Fruit           | 0     | 0.01  | 0.01 | 0.02  | 0.07 |
| Livestock       | 0     | 0.02  | 0.02 | 0.05  | 0.14 |
| Oil crops       | 0     | 0.02  | 0.02 | 0.03  | 0.11 |
| Pulses          | 0     | 0.02  | 0.02 | 0.03  | 0.09 |
| Roots & tubers  | 0     | 0.01  | 0.01 | 0.02  | 0.09 |
| Sugar crops     | 0.01  | 0.16  | 0.17 | 0.32  | 1.14 |
| Vegetables      | 0     | 0.02  | 0.02 | 0.04  | 0.14 |
| <b>China</b>    |       |       |      |       |      |
| Cereals         | 53.11 | 24.91 | 0    | 13.43 | 0    |
| Fiber           | 20.62 | 14.86 | 0    | 11.31 | 0    |
| Fruit           | 1.55  | 0.84  | 0    | 0.26  | 0    |
| Livestock       | 9.45  | 3.82  | 0    | 1.62  | 0    |
| Oil crops       | 51.35 | 31.81 | 0    | 18.43 | 0    |
| Pulses          | 5.16  | 2.53  | 0    | 1.78  | 0    |
| Roots & tubers  | 10.93 | 3.34  | 0    | 1.14  | 0    |
| Sugar crops     | 2.02  | 2.79  | 0    | 2     | 0    |
| Vegetables      | 4.76  | 2.23  | 0    | 0.95  | 0    |
| <b>Colombia</b> |       |       |      |       |      |
| Cereals         | 0     | 0.02  | 0.03 | 0.09  | 0.39 |
| Fiber           | 0     | 0.04  | 0.04 | 0.06  | 0.15 |
| Fruit           | 0     | 0.07  | 0.07 | 0.16  | 0.48 |
| Livestock       | 0     | 0.08  | 0.07 | 0.13  | 0.33 |
| Oil crops       | 0     | 0.01  | 0.01 | 0.03  | 0.17 |
| Pulses          | 0     | 0.08  | 0.08 | 0.16  | 0.37 |
| Roots & tubers  | 0     | 0.08  | 0.08 | 0.14  | 0.41 |



|                   |      |      |      |      |      |
|-------------------|------|------|------|------|------|
| Sugar crops       | 0    | 0    | 0    | 0    | 0.01 |
| Vegetables        | 0    | 0.02 | 0.02 | 0.03 | 0.07 |
| <b>Congo</b>      |      |      |      |      |      |
| Cereals           | 0    | 0.01 | 0    | 0    | 0    |
| Fiber             | 0    | 0    | 0    | 0    | 0    |
| Fruit             | 0    | 0.01 | 0    | 0    | 0    |
| Livestock         | 0    | 0    | 0    | 0    | 0    |
| Oil crops         | 0    | 0    | 0    | 0    | 0    |
| Pulses            | 0.01 | 0.02 | 0    | 0    | 0    |
| Roots & tubers    | 0.08 | 0.15 | 0.02 | 0.01 | 0    |
| Sugar crops       | 0    | 0    | 0    | 0    | 0    |
| Vegetables        | 0    | 0    | 0    | 0    | 0    |
| <b>Costa Rica</b> |      |      |      |      |      |
| Cereals           | 0    | 0    | 0    | 0    | 0.01 |
| Fiber             | 0    | 0    | 0    | 0    | 0    |
| Fruit             | 0    | 0.04 | 0.14 | 0.13 | 0.22 |
| Livestock         | 0    | 0    | 0.01 | 0.02 | 0.03 |
| Oil crops         | 0    | 0    | 0    | 0    | 0    |
| Pulses            | 0    | 0    | 0.01 | 0.01 | 0.02 |
| Roots & tubers    | 0    | 0    | 0.01 | 0.01 | 0.01 |
| Sugar crops       | 0    | 0    | 0    | 0    | 0    |
| Vegetables        | 0    | 0    | 0    | 0    | 0.01 |
| <b>Croatia</b>    |      |      |      |      |      |
| Cereals           | 0.07 | 0.24 | 0.09 | 0.26 | 0.09 |
| Fiber             | 0    | 0    | 0    | 0    | 0    |
| Fruit             | 0    | 0    | 0    | 0    | 0    |
| Livestock         | 0.01 | 0.02 | 0.01 | 0.03 | 0.01 |
| Oil crops         | 0.07 | 0.23 | 0.08 | 0.23 | 0.08 |
| Pulses            | 0    | 0.01 | 0    | 0.01 | 0    |
| Roots & tubers    | 0    | 0.01 | 0    | 0.01 | 0    |
| Sugar crops       | 0.11 | 0.4  | 0.15 | 0.44 | 0.15 |
| Vegetables        | 0    | 0    | 0    | 0    | 0    |
| <b>Cuba</b>       |      |      |      |      |      |
| Cereals           | 0.01 | 0.02 | 0.02 | 0.02 | 0.03 |
| Fiber             | 0    | 0    | 0    | 0    | 0    |
| Fruit             | 0.02 | 0.04 | 0.04 | 0.03 | 0.06 |
| Livestock         | 0    | 0.01 | 0.02 | 0.01 | 0.03 |
| Oil crops         | 0    | 0    | 0    | 0    | 0    |
| Pulses            | 0.04 | 0.09 | 0.08 | 0.06 | 0.09 |
| Roots & tubers    | 0.02 | 0.05 | 0.05 | 0.03 | 0.05 |
| Sugar crops       | 0    | 0    | 0    | 0    | 0    |
| Vegetables        | 0.01 | 0.03 | 0.03 | 0.02 | 0.03 |
| <b>Cyprus</b>     |      |      |      |      |      |
| Cereals           | 0    | 0    | 0    | 0    | 0    |
| Fiber             | 0    | 0    | 0    | 0    | 0    |
| Fruit             | 0    | 0    | 0    | 0    | 0    |

|                                         |      |      |      |      |      |
|-----------------------------------------|------|------|------|------|------|
| Livestock                               | 0    | 0.01 | 0    | 0    | 0    |
| Oil crops                               | 0    | 0    | 0    | 0    | 0    |
| Pulses                                  | 0    | 0    | 0    | 0    | 0    |
| Roots & tubers                          | 0    | 0    | 0    | 0    | 0    |
| Sugar crops                             | 0    | 0    | 0    | 0    | 0    |
| Vegetables                              | 0    | 0    | 0    | 0    | 0    |
| <b>Czech Republic</b>                   |      |      |      |      |      |
| Cereals                                 | 0.18 | 0.68 | 0.29 | 0.87 | 0.31 |
| Fiber                                   | 0    | 0    | 0    | 0    | 0    |
| Fruit                                   | 0    | 0    | 0    | 0    | 0    |
| Livestock                               | 0.01 | 0.05 | 0.03 | 0.1  | 0.04 |
| Oil crops                               | 0.25 | 0.98 | 0.43 | 1.37 | 0.49 |
| Pulses                                  | 0.02 | 0.07 | 0.02 | 0.06 | 0.02 |
| Roots & tubers                          | 0    | 0.02 | 0.02 | 0.04 | 0.01 |
| Sugar crops                             | 0.26 | 0.87 | 0.3  | 0.9  | 0.34 |
| Vegetables                              | 0    | 0    | 0    | 0    | 0    |
| <b>Democratic Republic of the Congo</b> |      |      |      |      |      |
| Cereals                                 | 0.08 | 0.15 | 0.01 | 0.04 | 0    |
| Fiber                                   | 0.02 | 0.04 | 0    | 0.01 | 0    |
| Fruit                                   | 0.08 | 0.13 | 0.01 | 0.04 | 0    |
| Livestock                               | 0    | 0    | 0    | 0    | 0    |
| Oil crops                               | 0.02 | 0.03 | 0    | 0    | 0    |
| Pulses                                  | 0.14 | 0.23 | 0.02 | 0.05 | 0    |
| Roots & tubers                          | 0.96 | 1.81 | 0.19 | 0.49 | 0    |
| Sugar crops                             | 0    | 0    | 0    | 0    | 0    |
| Vegetables                              | 0    | 0.01 | 0    | 0    | 0    |
| <b>Denmark</b>                          |      |      |      |      |      |
| Cereals                                 | 0.06 | 0.54 | 0.42 | 1.4  | 0.49 |
| Fiber                                   | 0    | 0    | 0    | 0    | 0    |
| Fruit                                   | 0    | 0    | 0    | 0    | 0    |
| Livestock                               | 0.01 | 0.07 | 0.06 | 0.16 | 0.04 |
| Oil crops                               | 0.04 | 0.32 | 0.25 | 0.82 | 0.28 |
| Pulses                                  | 0    | 0.01 | 0.01 | 0.04 | 0.01 |
| Roots & tubers                          | 0    | 0.03 | 0.03 | 0.09 | 0.03 |
| Sugar crops                             | 0.05 | 0.38 | 0.29 | 0.99 | 0.34 |
| Vegetables                              | 0    | 0    | 0    | 0.01 | 0    |
| <b>Djibouti</b>                         |      |      |      |      |      |
| Cereals                                 | 0    | 0    | 0    | 0    | 0    |
| Fiber                                   | 0    | 0    | 0    | 0    | 0    |
| Fruit                                   | 0    | 0    | 0    | 0    | 0    |
| Livestock                               | 0    | 0    | 0    | 0    | 0    |
| Oil crops                               | 0    | 0    | 0    | 0    | 0    |
| Pulses                                  | 0    | 0    | 0    | 0    | 0    |
| Roots & tubers                          | 0    | 0    | 0    | 0    | 0    |
| Sugar crops                             | 0    | 0    | 0    | 0    | 0    |

|                          |      |      |      |      |      |
|--------------------------|------|------|------|------|------|
| Vegetables               | 0    | 0    | 0    | 0    | 0    |
| <b>Dominica</b>          |      |      |      |      |      |
| Cereals                  | 0    | 0    | 0    | 0    | 0    |
| Fiber                    | 0    | 0    | 0    | 0    | 0    |
| Fruit                    | 0    | 0    | 0    | 0    | 0    |
| Livestock                | 0    | 0    | 0    | 0    | 0    |
| Oil crops                | 0    | 0    | 0    | 0    | 0    |
| Pulses                   | 0    | 0    | 0    | 0    | 0    |
| Roots & tubers           | 0    | 0    | 0    | 0    | 0    |
| Sugar crops              | 0    | 0    | 0    | 0    | 0    |
| Vegetables               | 0    | 0    | 0    | 0    | 0    |
| <b>Ecuador</b>           |      |      |      |      |      |
| Cereals                  | 0    | 0.05 | 0.05 | 0.07 | 0.13 |
| Fiber                    | 0    | 0    | 0    | 0    | 0    |
| Fruit                    | 0.01 | 0.2  | 0.18 | 0.2  | 0.3  |
| Livestock                | 0    | 0.04 | 0.04 | 0.06 | 0.15 |
| Oil crops                | 0    | 0.01 | 0.01 | 0.04 | 0.12 |
| Pulses                   | 0    | 0.01 | 0.01 | 0.02 | 0.03 |
| Roots & tubers           | 0    | 0.01 | 0.01 | 0.01 | 0.03 |
| Sugar crops              | 0    | 0    | 0    | 0    | 0    |
| Vegetables               | 0    | 0    | 0    | 0    | 0    |
| <b>Egypt</b>             |      |      |      |      |      |
| Cereals                  | 0.63 | 2.92 | 1.08 | 0.53 | 0.09 |
| Fiber                    | 0.17 | 0.76 | 0.28 | 0.14 | 0.02 |
| Fruit                    | 0.09 | 0.43 | 0.16 | 0.08 | 0.01 |
| Livestock                | 0.05 | 0.24 | 0.09 | 0.04 | 0.01 |
| Oil crops                | 0.02 | 0.11 | 0.04 | 0.02 | 0    |
| Pulses                   | 0.03 | 0.12 | 0.05 | 0.02 | 0    |
| Roots & tubers           | 0.04 | 0.2  | 0.07 | 0.04 | 0.01 |
| Sugar crops              | 0.43 | 1.99 | 0.74 | 0.36 | 0.06 |
| Vegetables               | 0.16 | 0.75 | 0.28 | 0.14 | 0.02 |
| <b>El Salvador</b>       |      |      |      |      |      |
| Cereals                  | 0.02 | 0.05 | 0.06 | 0.03 | 0.01 |
| Fiber                    | 0    | 0    | 0    | 0    | 0    |
| Fruit                    | 0    | 0.01 | 0.01 | 0    | 0    |
| Livestock                | 0.01 | 0.02 | 0.02 | 0.01 | 0    |
| Oil crops                | 0    | 0.01 | 0.01 | 0    | 0    |
| Pulses                   | 0.02 | 0.07 | 0.13 | 0.06 | 0.02 |
| Roots & tubers           | 0    | 0    | 0    | 0    | 0    |
| Sugar crops              | 0    | 0    | 0    | 0    | 0    |
| Vegetables               | 0    | 0    | 0    | 0    | 0    |
| <b>Equatorial Guinea</b> |      |      |      |      |      |
| Cereals                  | 0    | 0    | 0    | 0    | 0    |
| Fiber                    | 0    | 0    | 0    | 0    | 0    |
| Fruit                    | 0    | 0    | 0    | 0    | 0    |
| Livestock                | 0    | 0    | 0    | 0    | 0    |

|                 |      |      |      |      |      |
|-----------------|------|------|------|------|------|
| Oil crops       | 0    | 0    | 0    | 0    | 0    |
| Pulses          | 0    | 0    | 0    | 0    | 0    |
| Roots & tubers  | 0.01 | 0.01 | 0    | 0    | 0    |
| Sugar crops     | 0    | 0    | 0    | 0    | 0    |
| Vegetables      | 0    | 0    | 0    | 0    | 0    |
| <b>Eritrea</b>  |      |      |      |      |      |
| Cereals         | 0.03 | 0.08 | 0.01 | 0    | 0    |
| Fiber           | 0    | 0    | 0    | 0    | 0    |
| Fruit           | 0    | 0    | 0    | 0    | 0    |
| Livestock       | 0    | 0.01 | 0    | 0    | 0    |
| Oil crops       | 0    | 0.01 | 0    | 0    | 0    |
| Pulses          | 0    | 0.01 | 0    | 0    | 0    |
| Roots & tubers  | 0    | 0    | 0    | 0    | 0    |
| Sugar crops     | 0    | 0    | 0    | 0    | 0    |
| Vegetables      | 0    | 0    | 0    | 0    | 0    |
| <b>Estonia</b>  |      |      |      |      |      |
| Cereals         | 0    | 0.03 | 0.02 | 0.13 | 0.06 |
| Fiber           | 0    | 0    | 0    | 0    | 0    |
| Fruit           | 0    | 0    | 0    | 0    | 0    |
| Livestock       | 0    | 0.01 | 0.01 | 0.02 | 0.01 |
| Oil crops       | 0    | 0.04 | 0.03 | 0.2  | 0.1  |
| Pulses          | 0    | 0    | 0    | 0.01 | 0    |
| Roots & tubers  | 0    | 0    | 0    | 0.01 | 0.01 |
| Sugar crops     | 0    | 0    | 0    | 0    | 0    |
| Vegetables      | 0    | 0    | 0    | 0    | 0    |
| <b>Ethiopia</b> |      |      |      |      |      |
| Cereals         | 1.24 | 2.33 | 0.25 | 0.27 | 0    |
| Fiber           | 0.06 | 0.11 | 0.01 | 0.02 | 0    |
| Fruit           | 0.01 | 0.02 | 0    | 0    | 0    |
| Livestock       | 0.06 | 0.1  | 0.01 | 0    | 0    |
| Oil crops       | 0.09 | 0.14 | 0.01 | 0.01 | 0    |
| Pulses          | 0.5  | 0.71 | 0.05 | 0.05 | 0    |
| Roots & tubers  | 0.04 | 0.08 | 0.01 | 0.01 | 0    |
| Sugar crops     | 0    | 0    | 0    | 0    | 0    |
| Vegetables      | 0.01 | 0.02 | 0    | 0    | 0    |
| <b>Finland</b>  |      |      |      |      |      |
| Cereals         | 0.04 | 0.31 | 0.24 | 0.62 | 0.14 |
| Fiber           | 0    | 0    | 0    | 0    | 0    |
| Fruit           | 0    | 0    | 0    | 0    | 0    |
| Livestock       | 0.01 | 0.04 | 0.03 | 0.07 | 0.01 |
| Oil crops       | 0.01 | 0.11 | 0.08 | 0.21 | 0.05 |
| Pulses          | 0    | 0.01 | 0    | 0.01 | 0    |
| Roots & tubers  | 0    | 0.02 | 0.01 | 0.04 | 0.01 |
| Sugar crops     | 0.02 | 0.18 | 0.14 | 0.36 | 0.08 |
| Vegetables      | 0    | 0    | 0    | 0    | 0    |
| <b>France</b>   |      |      |      |      |      |

|                |      |      |      |      |      |
|----------------|------|------|------|------|------|
| Cereals        | 0.7  | 3.7  | 2.35 | 9.45 | 3.78 |
| Fiber          | 0    | 0    | 0    | 0    | 0    |
| Fruit          | 0.01 | 0.05 | 0.03 | 0.07 | 0.02 |
| Livestock      | 0.14 | 0.6  | 0.29 | 0.67 | 0.15 |
| Oil crops      | 0.62 | 3.08 | 1.88 | 9.18 | 4.14 |
| Pulses         | 0.15 | 0.67 | 0.36 | 1.15 | 0.4  |
| Roots & tubers | 0.01 | 0.11 | 0.11 | 0.43 | 0.16 |
| Sugar crops    | 0.13 | 2.2  | 2.36 | 14.7 | 6.98 |
| Vegetables     | 0.01 | 0.03 | 0.02 | 0.06 | 0.02 |
| <b>Gabon</b>   |      |      |      |      |      |
| Cereals        | 0    | 0    | 0    | 0    | 0    |
| Fiber          | 0    | 0    | 0    | 0    | 0    |
| Fruit          | 0.02 | 0.02 | 0    | 0    | 0    |
| Livestock      | 0    | 0    | 0    | 0    | 0    |
| Oil crops      | 0    | 0    | 0    | 0    | 0    |
| Pulses         | 0    | 0    | 0    | 0    | 0    |
| Roots & tubers | 0.04 | 0.05 | 0    | 0    | 0    |
| Sugar crops    | 0    | 0    | 0    | 0    | 0    |
| Vegetables     | 0    | 0    | 0    | 0    | 0    |
| <b>Gambia</b>  |      |      |      |      |      |
| Cereals        | 0.03 | 0.07 | 0.01 | 0    | 0    |
| Fiber          | 0    | 0    | 0    | 0    | 0    |
| Fruit          | 0    | 0    | 0    | 0    | 0    |
| Livestock      | 0    | 0    | 0    | 0    | 0    |
| Oil crops      | 0    | 0    | 0    | 0    | 0    |
| Pulses         | 0    | 0    | 0    | 0    | 0    |
| Roots & tubers | 0    | 0    | 0    | 0    | 0    |
| Sugar crops    | 0    | 0    | 0    | 0    | 0    |
| Vegetables     | 0    | 0    | 0    | 0    | 0    |
| <b>Georgia</b> |      |      |      |      |      |
| Cereals        | 0.01 | 0.07 | 0.02 | 0.01 | 0    |
| Fiber          | 0    | 0    | 0    | 0    | 0    |
| Fruit          | 0    | 0    | 0    | 0    | 0    |
| Livestock      | 0.01 | 0.03 | 0.01 | 0    | 0    |
| Oil crops      | 0    | 0.02 | 0.01 | 0    | 0    |
| Pulses         | 0.01 | 0.03 | 0.01 | 0.01 | 0    |
| Roots & tubers | 0    | 0.02 | 0.01 | 0    | 0    |
| Sugar crops    | 0    | 0    | 0    | 0    | 0    |
| Vegetables     | 0    | 0.01 | 0    | 0    | 0    |
| <b>Germany</b> |      |      |      |      |      |
| Cereals        | 0.57 | 3    | 1.82 | 6.27 | 2.29 |
| Fiber          | 0    | 0    | 0    | 0    | 0    |
| Fruit          | 0.01 | 0.02 | 0.01 | 0.01 | 0    |
| Livestock      | 0.07 | 0.38 | 0.24 | 0.94 | 0.38 |
| Oil crops      | 0.69 | 3.67 | 2.3  | 9.28 | 3.77 |
| Pulses         | 0.04 | 0.18 | 0.09 | 0.32 | 0.12 |

|                  |      |      |      |      |      |
|------------------|------|------|------|------|------|
| Roots & tubers   | 0.04 | 0.25 | 0.17 | 0.63 | 0.24 |
| Sugar crops      | 0.54 | 4.31 | 3.23 | 9.15 | 2.66 |
| Vegetables       | 0    | 0.02 | 0.01 | 0.03 | 0.01 |
| <b>Ghana</b>     |      |      |      |      |      |
| Cereals          | 0.17 | 0.24 | 0.02 | 0    | 0    |
| Fiber            | 0.02 | 0.03 | 0    | 0    | 0    |
| Fruit            | 0.22 | 0.3  | 0.02 | 0    | 0    |
| Livestock        | 0.01 | 0.01 | 0    | 0    | 0    |
| Oil crops        | 0.01 | 0.03 | 0    | 0    | 0    |
| Pulses           | 0.25 | 0.31 | 0.02 | 0    | 0    |
| Roots & tubers   | 1.23 | 1.7  | 0.13 | 0    | 0    |
| Sugar crops      | 0    | 0    | 0    | 0    | 0    |
| Vegetables       | 0.01 | 0.02 | 0    | 0    | 0    |
| <b>Greece</b>    |      |      |      |      |      |
| Cereals          | 0.14 | 0.55 | 0.24 | 0.4  | 0.04 |
| Fiber            | 0.25 | 1    | 0.45 | 0.78 | 0.09 |
| Fruit            | 0.03 | 0.09 | 0.04 | 0.06 | 0.01 |
| Livestock        | 0.02 | 0.07 | 0.03 | 0.04 | 0    |
| Oil crops        | 0.01 | 0.02 | 0.01 | 0.01 | 0    |
| Pulses           | 0.01 | 0.04 | 0.01 | 0.02 | 0    |
| Roots & tubers   | 0.01 | 0.04 | 0.02 | 0.03 | 0    |
| Sugar crops      | 0.16 | 0.62 | 0.25 | 0.41 | 0.04 |
| Vegetables       | 0.03 | 0.11 | 0.04 | 0.06 | 0.01 |
| <b>Grenada</b>   |      |      |      |      |      |
| Cereals          | 0    | 0    | 0    | 0    | 0    |
| Fiber            | 0    | 0    | 0    | 0    | 0    |
| Fruit            | 0    | 0    | 0    | 0    | 0    |
| Livestock        | 0    | 0    | 0    | 0    | 0    |
| Oil crops        | 0    | 0    | 0    | 0    | 0    |
| Pulses           | 0    | 0    | 0    | 0    | 0    |
| Roots & tubers   | 0    | 0    | 0    | 0    | 0    |
| Sugar crops      | 0    | 0    | 0    | 0    | 0    |
| Vegetables       | 0    | 0    | 0    | 0    | 0    |
| <b>Guatemala</b> |      |      |      |      |      |
| Cereals          | 0.01 | 0.04 | 0.08 | 0.05 | 0.07 |
| Fiber            | 0    | 0    | 0    | 0    | 0    |
| Fruit            | 0.02 | 0.06 | 0.1  | 0.06 | 0.06 |
| Livestock        | 0.01 | 0.03 | 0.04 | 0.02 | 0.02 |
| Oil crops        | 0.01 | 0.03 | 0.06 | 0.03 | 0.04 |
| Pulses           | 0.03 | 0.1  | 0.16 | 0.1  | 0.12 |
| Roots & tubers   | 0    | 0.01 | 0.02 | 0.01 | 0.01 |
| Sugar crops      | 0    | 0    | 0    | 0    | 0    |
| Vegetables       | 0    | 0.01 | 0.02 | 0.01 | 0.01 |
| <b>Guinea</b>    |      |      |      |      |      |
| Cereals          | 0.14 | 0.29 | 0.03 | 0    | 0    |
| Fiber            | 0.03 | 0.06 | 0.01 | 0    | 0    |

|                      |      |      |      |      |      |
|----------------------|------|------|------|------|------|
| Fruit                | 0.03 | 0.06 | 0.01 | 0    | 0    |
| Livestock            | 0.01 | 0.01 | 0    | 0    | 0    |
| Oil crops            | 0    | 0    | 0    | 0    | 0    |
| Pulses               | 0.01 | 0.03 | 0    | 0    | 0    |
| Roots & tubers       | 0.09 | 0.16 | 0.02 | 0    | 0    |
| Sugar crops          | 0    | 0    | 0    | 0    | 0    |
| Vegetables           | 0    | 0    | 0    | 0    | 0    |
| <b>Guinea-Bissau</b> |      |      |      |      |      |
| Cereals              | 0.02 | 0.03 | 0    | 0    | 0    |
| Fiber                | 0.01 | 0.01 | 0    | 0    | 0    |
| Fruit                | 0    | 0    | 0    | 0    | 0    |
| Livestock            | 0    | 0    | 0    | 0    | 0    |
| Oil crops            | 0    | 0    | 0    | 0    | 0    |
| Pulses               | 0    | 0    | 0    | 0    | 0    |
| Roots & tubers       | 0    | 0.01 | 0    | 0    | 0    |
| Sugar crops          | 0    | 0    | 0    | 0    | 0    |
| Vegetables           | 0    | 0    | 0    | 0    | 0    |
| <b>Guyana</b>        |      |      |      |      |      |
| Cereals              | 0    | 0    | 0    | 0    | 0.03 |
| Fiber                | 0    | 0    | 0    | 0    | 0    |
| Fruit                | 0    | 0    | 0    | 0    | 0    |
| Livestock            | 0    | 0    | 0    | 0    | 0    |
| Oil crops            | 0    | 0    | 0    | 0    | 0.01 |
| Pulses               | 0    | 0    | 0    | 0    | 0    |
| Roots & tubers       | 0    | 0    | 0    | 0    | 0    |
| Sugar crops          | 0    | 0    | 0    | 0    | 0    |
| Vegetables           | 0    | 0    | 0    | 0    | 0    |
| <b>Haiti</b>         |      |      |      |      |      |
| Cereals              | 0.01 | 0.03 | 0.02 | 0.01 | 0    |
| Fiber                | 0    | 0    | 0    | 0    | 0    |
| Fruit                | 0.01 | 0.03 | 0.03 | 0.01 | 0    |
| Livestock            | 0    | 0    | 0    | 0    | 0    |
| Oil crops            | 0    | 0    | 0    | 0    | 0    |
| Pulses               | 0.03 | 0.07 | 0.06 | 0.03 | 0.01 |
| Roots & tubers       | 0.02 | 0.05 | 0.05 | 0.02 | 0.01 |
| Sugar crops          | 0    | 0    | 0    | 0    | 0    |
| Vegetables           | 0    | 0    | 0    | 0    | 0    |
| <b>Honduras</b>      |      |      |      |      |      |
| Cereals              | 0.01 | 0.02 | 0.02 | 0.02 | 0.05 |
| Fiber                | 0    | 0    | 0    | 0    | 0    |
| Fruit                | 0.02 | 0.03 | 0.03 | 0.03 | 0.07 |
| Livestock            | 0.01 | 0.01 | 0.01 | 0.01 | 0.03 |
| Oil crops            | 0    | 0    | 0    | 0    | 0    |
| Pulses               | 0.02 | 0.03 | 0.03 | 0.05 | 0.15 |
| Roots & tubers       | 0    | 0    | 0    | 0    | 0    |
| Sugar crops          | 0    | 0    | 0    | 0    | 0    |

|                                   |       |       |      |      |      |
|-----------------------------------|-------|-------|------|------|------|
| Vegetables                        | 0     | 0.01  | 0    | 0    | 0.01 |
| <b>Hungary</b>                    |       |       |      |      |      |
| Cereals                           | 0.29  | 1.13  | 0.49 | 1.3  | 0.43 |
| Fiber                             | 0     | 0     | 0    | 0    | 0    |
| Fruit                             | 0     | 0.01  | 0    | 0.01 | 0    |
| Livestock                         | 0.01  | 0.05  | 0.03 | 0.08 | 0.02 |
| Oil crops                         | 0.19  | 0.81  | 0.39 | 1.21 | 0.43 |
| Pulses                            | 0.01  | 0.04  | 0.02 | 0.06 | 0.02 |
| Roots & tubers                    | 0.01  | 0.02  | 0.01 | 0.02 | 0.01 |
| Sugar crops                       | 0.22  | 0.8   | 0.3  | 0.65 | 0.17 |
| Vegetables                        | 0.01  | 0.02  | 0.01 | 0.01 | 0    |
| <b>Iceland</b>                    |       |       |      |      |      |
| Cereals                           | 0     | 0     | 0    | 0    | 0    |
| Fiber                             | 0     | 0     | 0    | 0    | 0    |
| Fruit                             | 0     | 0     | 0    | 0    | 0    |
| Livestock                         | 0     | 0     | 0    | 0    | 0    |
| Oil crops                         | 0     | 0     | 0    | 0    | 0    |
| Pulses                            | 0     | 0     | 0    | 0    | 0    |
| Roots & tubers                    | 0     | 0     | 0    | 0    | 0    |
| Sugar crops                       | 0     | 0     | 0    | 0    | 0    |
| Vegetables                        | 0     | 0     | 0    | 0    | 0    |
| <b>India</b>                      |       |       |      |      |      |
| Cereals                           | 18.54 | 33.22 | 3.75 | 0.71 | 0    |
| Fiber                             | 6.23  | 18.4  | 2.54 | 0.48 | 0    |
| Fruit                             | 1.02  | 2.35  | 0.3  | 0.06 | 0    |
| Livestock                         | 1.88  | 3.98  | 0.48 | 0.09 | 0    |
| Oil crops                         | 19.06 | 42.43 | 5.26 | 1.01 | 0    |
| Pulses                            | 4.02  | 9.94  | 1.28 | 0.25 | 0    |
| Roots & tubers                    | 1.81  | 3.11  | 0.34 | 0.06 | 0    |
| Sugar crops                       | 0     | 0     | 0    | 0    | 0    |
| Vegetables                        | 1.13  | 1.88  | 0.2  | 0.04 | 0    |
| <b>Indonesia</b>                  |       |       |      |      |      |
| Cereals                           | 2.43  | 3.37  | 0.12 | 0.9  | 0    |
| Fiber                             | 0     | 0.01  | 0    | 0    | 0    |
| Fruit                             | 0.35  | 0.62  | 0.03 | 0.32 | 0    |
| Livestock                         | 0.27  | 0.35  | 0.01 | 0.01 | 0    |
| Oil crops                         | 1.82  | 2.54  | 0.09 | 0.71 | 0    |
| Pulses                            | 0.33  | 0.59  | 0.03 | 0.31 | 0    |
| Roots & tubers                    | 1.81  | 2.59  | 0.09 | 0.25 | 0    |
| Sugar crops                       | 0     | 0     | 0    | 0    | 0    |
| Vegetables                        | 0.06  | 0.1   | 0.01 | 0.05 | 0    |
| <b>Iran (Islamic Republic of)</b> |       |       |      |      |      |
| Cereals                           | 1.93  | 3.76  | 0.43 | 1.51 | 0    |
| Fiber                             | 0.24  | 0.39  | 0.04 | 0.07 | 0    |
| Fruit                             | 0.19  | 0.42  | 0.05 | 0.15 | 0    |



|                |      |      |      |      |      |
|----------------|------|------|------|------|------|
| Livestock      | 0.12 | 0.4  | 0.06 | 0.18 | 0    |
| Oil crops      | 0.18 | 1.45 | 0.24 | 0.19 | 0    |
| Pulses         | 0.2  | 0.46 | 0.06 | 0.16 | 0    |
| Roots & tubers | 0.11 | 0.22 | 0.03 | 0.16 | 0    |
| Sugar crops    | 0.54 | 2.49 | 0.38 | 1.36 | 0    |
| Vegetables     | 0.23 | 0.5  | 0.06 | 0.24 | 0    |
| <b>Iraq</b>    |      |      |      |      |      |
| Cereals        | 0.21 | 0.67 | 0.18 | 0.1  | 0.04 |
| Fiber          | 0.01 | 0.04 | 0.01 | 0.01 | 0    |
| Fruit          | 0.01 | 0.04 | 0.02 | 0.01 | 0    |
| Livestock      | 0.01 | 0.02 | 0.01 | 0.01 | 0.01 |
| Oil crops      | 0    | 0.01 | 0    | 0    | 0    |
| Pulses         | 0    | 0.01 | 0    | 0    | 0    |
| Roots & tubers | 0.01 | 0.04 | 0.02 | 0.01 | 0.01 |
| Sugar crops    | 0    | 0.01 | 0    | 0    | 0    |
| Vegetables     | 0.02 | 0.09 | 0.03 | 0.02 | 0    |
| <b>Ireland</b> |      |      |      |      |      |
| Cereals        | 0.02 | 0.13 | 0.09 | 0.29 | 0.09 |
| Fiber          | 0    | 0    | 0    | 0    | 0    |
| Fruit          | 0    | 0    | 0    | 0    | 0    |
| Livestock      | 0.03 | 0.12 | 0.06 | 0.11 | 0.02 |
| Oil crops      | 0    | 0.02 | 0.01 | 0.04 | 0.01 |
| Pulses         | 0    | 0.01 | 0.01 | 0.03 | 0.01 |
| Roots & tubers | 0    | 0.01 | 0.01 | 0.02 | 0.01 |
| Sugar crops    | 0.02 | 0.21 | 0.18 | 0.58 | 0.18 |
| Vegetables     | 0    | 0    | 0    | 0    | 0    |
| <b>Israel</b>  |      |      |      |      |      |
| Cereals        | 0.02 | 0.1  | 0.04 | 0.02 | 0    |
| Fiber          | 0.02 | 0.13 | 0.05 | 0.02 | 0    |
| Fruit          | 0.02 | 0.08 | 0.03 | 0.01 | 0    |
| Livestock      | 0.03 | 0.14 | 0.05 | 0.02 | 0    |
| Oil crops      | 0    | 0.02 | 0.01 | 0    | 0    |
| Pulses         | 0    | 0    | 0    | 0    | 0    |
| Roots & tubers | 0.02 | 0.08 | 0.03 | 0.01 | 0    |
| Sugar crops    | 0    | 0    | 0    | 0    | 0    |
| Vegetables     | 0.02 | 0.08 | 0.03 | 0.01 | 0    |
| <b>Italy</b>   |      |      |      |      |      |
| Cereals        | 0.2  | 1.29 | 0.89 | 2.58 | 0.75 |
| Fiber          | 0    | 0    | 0    | 0    | 0    |
| Fruit          | 0.03 | 0.18 | 0.11 | 0.32 | 0.09 |
| Livestock      | 0.05 | 0.3  | 0.2  | 0.41 | 0.06 |
| Oil crops      | 0.07 | 0.59 | 0.45 | 1    | 0.17 |
| Pulses         | 0.01 | 0.04 | 0.03 | 0.07 | 0.02 |
| Roots & tubers | 0.01 | 0.06 | 0.03 | 0.08 | 0.02 |
| Sugar crops    | 0.22 | 1.65 | 1.23 | 2.92 | 0.59 |
| Vegetables     | 0.05 | 0.25 | 0.16 | 0.41 | 0.11 |

**Ivory Coast**

|                |   |      |   |   |   |
|----------------|---|------|---|---|---|
| Cereals        | 0 | 0    | 0 | 0 | 0 |
| Fiber          | 0 | 0    | 0 | 0 | 0 |
| Fruit          | 0 | 0    | 0 | 0 | 0 |
| Livestock      | 0 | 0.01 | 0 | 0 | 0 |
| Oil crops      | 0 | 0    | 0 | 0 | 0 |
| Pulses         | 0 | 0    | 0 | 0 | 0 |
| Roots & tubers | 0 | 0    | 0 | 0 | 0 |
| Sugar crops    | 0 | 0    | 0 | 0 | 0 |
| Vegetables     | 0 | 0    | 0 | 0 | 0 |

**Jamaica**

|                |      |      |   |   |   |
|----------------|------|------|---|---|---|
| Cereals        | 0    | 0    | 0 | 0 | 0 |
| Fiber          | 0    | 0    | 0 | 0 | 0 |
| Fruit          | 0.01 | 0.02 | 0 | 0 | 0 |
| Livestock      | 0    | 0.01 | 0 | 0 | 0 |
| Oil crops      | 0.01 | 0.02 | 0 | 0 | 0 |
| Pulses         | 0    | 0    | 0 | 0 | 0 |
| Roots & tubers | 0.01 | 0.02 | 0 | 0 | 0 |
| Sugar crops    | 0    | 0    | 0 | 0 | 0 |
| Vegetables     | 0    | 0    | 0 | 0 | 0 |

**Japan**

|                |      |      |      |      |   |
|----------------|------|------|------|------|---|
| Cereals        | 0.38 | 0.54 | 0.22 | 0.15 | 0 |
| Fiber          | 0    | 0    | 0    | 0    | 0 |
| Fruit          | 0.01 | 0.02 | 0.01 | 0.01 | 0 |
| Livestock      | 0.72 | 0.54 | 0.15 | 0.15 | 0 |
| Oil crops      | 0.26 | 0.34 | 0.14 | 0.11 | 0 |
| Pulses         | 0.11 | 0.15 | 0.06 | 0.05 | 0 |
| Roots & tubers | 0.16 | 0.18 | 0.07 | 0.05 | 0 |
| Sugar crops    | 1.01 | 1.43 | 0.59 | 0.45 | 0 |
| Vegetables     | 0.09 | 0.12 | 0.05 | 0.04 | 0 |

**Jordan**

|                |      |      |      |      |   |
|----------------|------|------|------|------|---|
| Cereals        | 0    | 0.01 | 0    | 0    | 0 |
| Fiber          | 0    | 0    | 0    | 0    | 0 |
| Fruit          | 0    | 0.01 | 0    | 0    | 0 |
| Livestock      | 0    | 0.02 | 0.01 | 0    | 0 |
| Oil crops      | 0    | 0    | 0    | 0    | 0 |
| Pulses         | 0    | 0    | 0    | 0    | 0 |
| Roots & tubers | 0    | 0.01 | 0    | 0    | 0 |
| Sugar crops    | 0    | 0    | 0    | 0    | 0 |
| Vegetables     | 0.01 | 0.04 | 0.02 | 0.01 | 0 |

**Kazakhstan**

|           |      |      |      |      |      |
|-----------|------|------|------|------|------|
| Cereals   | 0.08 | 1.55 | 0.73 | 1.53 | 2.66 |
| Fiber     | 0.05 | 0.38 | 0.16 | 0.19 | 0.26 |
| Fruit     | 0    | 0    | 0    | 0    | 0    |
| Livestock | 0.02 | 0.14 | 0.06 | 0.06 | 0.07 |
| Oil crops | 0.02 | 0.31 | 0.14 | 0.17 | 0.22 |

|                                             |      |      |      |      |      |
|---------------------------------------------|------|------|------|------|------|
| Pulses                                      | 0    | 0.03 | 0.02 | 0.02 | 0.04 |
| Roots & tubers                              | 0.01 | 0.11 | 0.05 | 0.05 | 0.07 |
| Sugar crops                                 | 0.01 | 0.13 | 0.06 | 0.04 | 0.03 |
| Vegetables                                  | 0.01 | 0.06 | 0.02 | 0.02 | 0.01 |
| <b>Kenya</b>                                |      |      |      |      |      |
| Cereals                                     | 0.2  | 0.42 | 0.05 | 0.17 | 0    |
| Fiber                                       | 0.01 | 0.03 | 0    | 0.01 | 0    |
| Fruit                                       | 0.05 | 0.1  | 0.01 | 0.05 | 0    |
| Livestock                                   | 0.06 | 0.12 | 0.01 | 0.04 | 0    |
| Oil crops                                   | 0.01 | 0.02 | 0    | 0.01 | 0    |
| Pulses                                      | 0.46 | 0.91 | 0.1  | 0.3  | 0    |
| Roots & tubers                              | 0.1  | 0.23 | 0.03 | 0.1  | 0    |
| Sugar crops                                 | 0    | 0    | 0    | 0    | 0    |
| Vegetables                                  | 0.02 | 0.04 | 0.01 | 0.02 | 0    |
| <b>Kuwait</b>                               |      |      |      |      |      |
| Cereals                                     | 0    | 0    | 0    | 0    | 0    |
| Fiber                                       | 0    | 0    | 0    | 0    | 0    |
| Fruit                                       | 0    | 0    | 0    | 0    | 0    |
| Livestock                                   | 0    | 0.01 | 0.01 | 0    | 0    |
| Oil crops                                   | 0    | 0    | 0    | 0    | 0    |
| Pulses                                      | 0    | 0    | 0    | 0    | 0    |
| Roots & tubers                              | 0    | 0    | 0    | 0    | 0    |
| Sugar crops                                 | 0    | 0    | 0    | 0    | 0    |
| Vegetables                                  | 0    | 0.01 | 0    | 0    | 0    |
| <b>Kyrgyzstan</b>                           |      |      |      |      |      |
| Cereals                                     | 0.03 | 0.18 | 0.06 | 0.09 | 0.13 |
| Fiber                                       | 0.02 | 0.1  | 0.04 | 0.04 | 0.06 |
| Fruit                                       | 0    | 0    | 0    | 0    | 0    |
| Livestock                                   | 0.01 | 0.04 | 0.01 | 0.01 | 0.01 |
| Oil crops                                   | 0.01 | 0.04 | 0.01 | 0.01 | 0.01 |
| Pulses                                      | 0.01 | 0.12 | 0.06 | 0.03 | 0.01 |
| Roots & tubers                              | 0.01 | 0.05 | 0.02 | 0.03 | 0.04 |
| Sugar crops                                 | 0.01 | 0.07 | 0.02 | 0.03 | 0.05 |
| Vegetables                                  | 0    | 0.02 | 0.01 | 0.01 | 0.01 |
| <b>Lao People's<br/>Democratic Republic</b> |      |      |      |      |      |
| Cereals                                     | 0.11 | 0.19 | 0.01 | 0    | 0    |
| Fiber                                       | 0.01 | 0.01 | 0    | 0    | 0    |
| Fruit                                       | 0.01 | 0.02 | 0    | 0    | 0    |
| Livestock                                   | 0    | 0.01 | 0    | 0    | 0    |
| Oil crops                                   | 0.02 | 0.03 | 0    | 0    | 0    |
| Pulses                                      | 0.01 | 0.01 | 0    | 0    | 0    |
| Roots & tubers                              | 0.02 | 0.03 | 0    | 0    | 0    |
| Sugar crops                                 | 0    | 0    | 0    | 0    | 0    |
| Vegetables                                  | 0    | 0    | 0    | 0    | 0    |
| <b>Latvia</b>                               |      |      |      |      |      |

|                |      |      |      |      |      |
|----------------|------|------|------|------|------|
| Cereals        | 0.01 | 0.07 | 0.06 | 0.24 | 0.1  |
| Fiber          | 0    | 0    | 0    | 0    | 0    |
| Fruit          | 0    | 0    | 0    | 0    | 0    |
| Livestock      | 0    | 0.01 | 0.01 | 0.03 | 0.01 |
| Oil crops      | 0.01 | 0.09 | 0.07 | 0.29 | 0.12 |
| Pulses         | 0    | 0    | 0    | 0    | 0    |
| Roots & tubers | 0    | 0.01 | 0.01 | 0.04 | 0.02 |
| Sugar crops    | 0    | 0.04 | 0.03 | 0.14 | 0.06 |
| Vegetables     | 0    | 0    | 0    | 0    | 0    |
| <b>Lebanon</b> |      |      |      |      |      |
| Cereals        | 0.01 | 0.03 | 0.01 | 0.01 | 0.01 |
| Fiber          | 0    | 0    | 0    | 0    | 0    |
| Fruit          | 0.01 | 0.03 | 0.01 | 0.01 | 0.01 |
| Livestock      | 0    | 0.01 | 0    | 0.01 | 0.02 |
| Oil crops      | 0    | 0    | 0    | 0    | 0    |
| Pulses         | 0    | 0    | 0    | 0    | 0    |
| Roots & tubers | 0    | 0.02 | 0.01 | 0.01 | 0.02 |
| Sugar crops    | 0    | 0.02 | 0.01 | 0.01 | 0.01 |
| Vegetables     | 0    | 0.02 | 0.01 | 0.01 | 0.01 |
| <b>Lesotho</b> |      |      |      |      |      |
| Cereals        | 0.01 | 0.01 | 0    | 0    | 0    |
| Fiber          | 0    | 0    | 0    | 0    | 0    |
| Fruit          | 0    | 0    | 0    | 0    | 0    |
| Livestock      | 0    | 0    | 0    | 0    | 0    |
| Oil crops      | 0    | 0    | 0    | 0    | 0    |
| Pulses         | 0.01 | 0.01 | 0    | 0    | 0    |
| Roots & tubers | 0    | 0.01 | 0    | 0    | 0    |
| Sugar crops    | 0    | 0    | 0    | 0    | 0    |
| Vegetables     | 0    | 0    | 0    | 0    | 0    |
| <b>Liberia</b> |      |      |      |      |      |
| Cereals        | 0    | 0.01 | 0    | 0    | 0    |
| Fiber          | 0    | 0    | 0    | 0    | 0    |
| Fruit          | 0.01 | 0.02 | 0    | 0    | 0    |
| Livestock      | 0    | 0    | 0    | 0    | 0    |
| Oil crops      | 0    | 0.01 | 0    | 0    | 0    |
| Pulses         | 0    | 0    | 0    | 0    | 0    |
| Roots & tubers | 0.03 | 0.08 | 0.01 | 0    | 0    |
| Sugar crops    | 0    | 0    | 0    | 0    | 0    |
| Vegetables     | 0    | 0    | 0    | 0    | 0    |
| <b>Libya</b>   |      |      |      |      |      |
| Cereals        | 0.01 | 0.03 | 0.01 | 0.01 | 0.02 |
| Fiber          | 0    | 0    | 0    | 0    | 0    |
| Fruit          | 0    | 0.01 | 0    | 0.01 | 0.01 |
| Livestock      | 0    | 0.02 | 0.01 | 0.01 | 0    |
| Oil crops      | 0    | 0    | 0    | 0    | 0    |
| Pulses         | 0    | 0.01 | 0    | 0    | 0    |

|                   |      |      |      |      |      |
|-------------------|------|------|------|------|------|
| Roots & tubers    | 0    | 0.01 | 0    | 0.01 | 0.01 |
| Sugar crops       | 0    | 0    | 0    | 0    | 0    |
| Vegetables        | 0    | 0.02 | 0.01 | 0.01 | 0.02 |
| <b>Lithuania</b>  |      |      |      |      |      |
| Cereals           | 0.03 | 0.17 | 0.11 | 0.35 | 0.12 |
| Fiber             | 0    | 0    | 0    | 0    | 0    |
| Fruit             | 0    | 0    | 0    | 0    | 0    |
| Livestock         | 0.01 | 0.03 | 0.02 | 0.06 | 0.02 |
| Oil crops         | 0.03 | 0.18 | 0.11 | 0.39 | 0.14 |
| Pulses            | 0.01 | 0.02 | 0.01 | 0.03 | 0.01 |
| Roots & tubers    | 0    | 0.02 | 0.01 | 0.03 | 0.01 |
| Sugar crops       | 0.01 | 0.11 | 0.09 | 0.33 | 0.11 |
| Vegetables        | 0    | 0    | 0    | 0    | 0    |
| <b>Luxembourg</b> |      |      |      |      |      |
| Cereals           | 0    | 0.01 | 0.01 | 0.03 | 0    |
| Fiber             | 0    | 0    | 0    | 0    | 0    |
| Fruit             | 0    | 0    | 0    | 0    | 0    |
| Livestock         | 0    | 0    | 0    | 0.01 | 0    |
| Oil crops         | 0    | 0.01 | 0.01 | 0.03 | 0.01 |
| Pulses            | 0    | 0    | 0    | 0    | 0    |
| Roots & tubers    | 0    | 0    | 0    | 0    | 0    |
| Sugar crops       | 0    | 0    | 0    | 0    | 0    |
| Vegetables        | 0    | 0    | 0    | 0    | 0    |
| <b>Madagascar</b> |      |      |      |      |      |
| Cereals           | 0.16 | 0.19 | 0.01 | 0    | 0    |
| Fiber             | 0.01 | 0.02 | 0    | 0    | 0    |
| Fruit             | 0.03 | 0.03 | 0    | 0    | 0    |
| Livestock         | 0.02 | 0.02 | 0    | 0    | 0    |
| Oil crops         | 0.01 | 0.01 | 0    | 0    | 0    |
| Pulses            | 0.16 | 0.19 | 0.01 | 0    | 0    |
| Roots & tubers    | 0.34 | 0.41 | 0.02 | 0    | 0    |
| Sugar crops       | 0    | 0    | 0    | 0    | 0    |
| Vegetables        | 0    | 0    | 0    | 0    | 0    |
| <b>Malawi</b>     |      |      |      |      |      |
| Cereals           | 0.18 | 0.26 | 0.02 | 0.03 | 0    |
| Fiber             | 0.05 | 0.07 | 0.01 | 0    | 0    |
| Fruit             | 0.03 | 0.05 | 0.01 | 0    | 0    |
| Livestock         | 0.01 | 0.01 | 0    | 0    | 0    |
| Oil crops         | 0.09 | 0.11 | 0.01 | 0    | 0    |
| Pulses            | 0.19 | 0.27 | 0.02 | 0.01 | 0    |
| Roots & tubers    | 0.35 | 0.48 | 0.04 | 0.03 | 0    |
| Sugar crops       | 0    | 0    | 0    | 0    | 0    |
| Vegetables        | 0.01 | 0.01 | 0    | 0    | 0    |
| <b>Malaysia</b>   |      |      |      |      |      |
| Cereals           | 0.01 | 0.09 | 0.01 | 0.09 | 0    |
| Fiber             | 0    | 0    | 0    | 0    | 0    |

|                   |      |      |      |      |      |
|-------------------|------|------|------|------|------|
| Fruit             | 0.02 | 0.04 | 0    | 0.02 | 0    |
| Livestock         | 0.04 | 0.15 | 0.01 | 0.03 | 0    |
| Oil crops         | 0.02 | 0.04 | 0    | 0.02 | 0    |
| Pulses            | 0    | 0    | 0    | 0    | 0    |
| Roots & tubers    | 0    | 0.01 | 0    | 0    | 0    |
| Sugar crops       | 0    | 0    | 0    | 0    | 0    |
| Vegetables        | 0    | 0    | 0    | 0    | 0    |
| <b>Mali</b>       |      |      |      |      |      |
| Cereals           | 0.44 | 0.82 | 0.09 | 0    | 0    |
| Fiber             | 0.31 | 0.57 | 0.06 | 0    | 0    |
| Fruit             | 0.01 | 0.01 | 0    | 0    | 0    |
| Livestock         | 0.02 | 0.04 | 0    | 0    | 0    |
| Oil crops         | 0    | 0.01 | 0    | 0    | 0    |
| Pulses            | 0    | 0    | 0    | 0    | 0    |
| Roots & tubers    | 0.02 | 0.04 | 0    | 0    | 0    |
| Sugar crops       | 0    | 0    | 0    | 0    | 0    |
| Vegetables        | 0.01 | 0.01 | 0    | 0    | 0    |
| <b>Mauritania</b> |      |      |      |      |      |
| Cereals           | 0.01 | 0.02 | 0    | 0    | 0    |
| Fiber             | 0    | 0    | 0    | 0    | 0    |
| Fruit             | 0    | 0    | 0    | 0    | 0    |
| Livestock         | 0.01 | 0.01 | 0    | 0    | 0    |
| Oil crops         | 0    | 0    | 0    | 0    | 0    |
| Pulses            | 0.01 | 0.02 | 0    | 0    | 0    |
| Roots & tubers    | 0    | 0    | 0    | 0    | 0    |
| Sugar crops       | 0    | 0    | 0    | 0    | 0    |
| Vegetables        | 0    | 0    | 0    | 0    | 0    |
| <b>Mauritius</b>  |      |      |      |      |      |
| Cereals           | 0    | 0    | 0    | 0    | 0    |
| Fiber             | 0    | 0    | 0    | 0    | 0    |
| Fruit             | 0    | 0    | 0    | 0    | 0    |
| Livestock         | 0    | 0    | 0    | 0    | 0    |
| Oil crops         | 0    | 0    | 0    | 0    | 0    |
| Pulses            | 0    | 0    | 0    | 0    | 0    |
| Roots & tubers    | 0    | 0    | 0    | 0    | 0    |
| Sugar crops       | 0    | 0    | 0    | 0    | 0    |
| Vegetables        | 0    | 0    | 0    | 0    | 0    |
| <b>Mexico</b>     |      |      |      |      |      |
| Cereals           | 0.88 | 1.89 | 1.57 | 1.08 | 1.55 |
| Fiber             | 0    | 0.02 | 0.06 | 0.2  | 0.67 |
| Fruit             | 0.08 | 0.25 | 0.37 | 0.24 | 0.34 |
| Livestock         | 0.16 | 0.4  | 0.49 | 0.28 | 0.3  |
| Oil crops         | 0.14 | 0.25 | 0.1  | 0.06 | 0.09 |
| Pulses            | 0.87 | 1.63 | 0.68 | 0.44 | 0.61 |
| Roots & tubers    | 0.02 | 0.05 | 0.05 | 0.04 | 0.05 |
| Sugar crops       | 0    | 0    | 0    | 0    | 0    |

|                   |      |      |      |      |      |
|-------------------|------|------|------|------|------|
| Vegetables        | 0.05 | 0.12 | 0.13 | 0.11 | 0.21 |
| <b>Mongolia</b>   |      |      |      |      |      |
| Cereals           | 0.01 | 0.01 | 0    | 0.03 | 0    |
| Fiber             | 0    | 0    | 0    | 0    | 0    |
| Fruit             | 0    | 0    | 0    | 0    | 0    |
| Livestock         | 0.01 | 0.01 | 0    | 0.01 | 0    |
| Oil crops         | 0    | 0.02 | 0.01 | 0.01 | 0    |
| Pulses            | 0    | 0    | 0    | 0    | 0    |
| Roots & tubers    | 0    | 0    | 0    | 0.01 | 0    |
| Sugar crops       | 0    | 0    | 0    | 0    | 0    |
| Vegetables        | 0    | 0    | 0    | 0    | 0    |
| <b>Montenegro</b> |      |      |      |      |      |
| Cereals           | 0    | 0    | 0    | 0    | 0    |
| Fiber             | 0    | 0    | 0    | 0    | 0    |
| Fruit             | 0    | 0    | 0    | 0    | 0    |
| Livestock         | 0.02 | 0.07 | 0.02 | 0.03 | 0    |
| Oil crops         | 0    | 0    | 0    | 0    | 0    |
| Pulses            | 0    | 0    | 0    | 0    | 0    |
| Roots & tubers    | 0    | 0.01 | 0    | 0    | 0    |
| Sugar crops       | 0    | 0    | 0    | 0    | 0    |
| Vegetables        | 0    | 0    | 0    | 0    | 0    |
| <b>Morocco</b>    |      |      |      |      |      |
| Cereals           | 0.23 | 0.85 | 0.25 | 0.25 | 0.31 |
| Fiber             | 0    | 0    | 0    | 0    | 0    |
| Fruit             | 0.03 | 0.1  | 0.03 | 0.03 | 0.03 |
| Livestock         | 0.04 | 0.12 | 0.03 | 0.02 | 0.01 |
| Oil crops         | 0.01 | 0.02 | 0.01 | 0    | 0    |
| Pulses            | 0.01 | 0.05 | 0.02 | 0.01 | 0.01 |
| Roots & tubers    | 0.03 | 0.09 | 0.02 | 0.02 | 0.02 |
| Sugar crops       | 0.31 | 1.07 | 0.31 | 0.29 | 0.36 |
| Vegetables        | 0.04 | 0.15 | 0.04 | 0.03 | 0.03 |
| <b>Mozambique</b> |      |      |      |      |      |
| Cereals           | 0.07 | 0.19 | 0.03 | 0.02 | 0    |
| Fiber             | 0.04 | 0.07 | 0.01 | 0.24 | 0    |
| Fruit             | 0.01 | 0.02 | 0    | 0    | 0    |
| Livestock         | 0    | 0.01 | 0    | 0    | 0    |
| Oil crops         | 0.02 | 0.04 | 0    | 0.01 | 0    |
| Pulses            | 0.21 | 0.34 | 0.03 | 0.02 | 0    |
| Roots & tubers    | 0.32 | 0.79 | 0.1  | 0.01 | 0    |
| Sugar crops       | 0    | 0    | 0    | 0    | 0    |
| Vegetables        | 0.01 | 0.01 | 0    | 0    | 0    |
| <b>Myanmar</b>    |      |      |      |      |      |
| Cereals           | 0.97 | 1.78 | 0.1  | 0.04 | 0    |
| Fiber             | 0.15 | 0.25 | 0.01 | 0.03 | 0    |
| Fruit             | 0.03 | 0.06 | 0    | 0    | 0    |
| Livestock         | 0.08 | 0.11 | 0    | 0    | 0    |

|                    |      |      |      |      |      |
|--------------------|------|------|------|------|------|
| Oil crops          | 0.72 | 1.18 | 0.05 | 0.02 | 0    |
| Pulses             | 3.58 | 6    | 0.28 | 0.1  | 0    |
| Roots & tubers     | 0.04 | 0.07 | 0    | 0    | 0    |
| Sugar crops        | 0    | 0    | 0    | 0    | 0    |
| Vegetables         | 0.06 | 0.09 | 0    | 0    | 0    |
| <b>Namibia</b>     |      |      |      |      |      |
| Cereals            | 0.02 | 0.05 | 0.01 | 0    | 0    |
| Fiber              | 0    | 0    | 0    | 0    | 0    |
| Fruit              | 0    | 0    | 0    | 0    | 0    |
| Livestock          | 0    | 0.01 | 0    | 0    | 0    |
| Oil crops          | 0    | 0    | 0    | 0    | 0    |
| Pulses             | 0    | 0.01 | 0    | 0    | 0    |
| Roots & tubers     | 0    | 0    | 0    | 0    | 0    |
| Sugar crops        | 0    | 0    | 0    | 0    | 0    |
| Vegetables         | 0    | 0    | 0    | 0    | 0    |
| <b>Nepal</b>       |      |      |      |      |      |
| Cereals            | 0.49 | 0.92 | 0.11 | 0.02 | 0    |
| Fiber              | 0    | 0    | 0    | 0    | 0    |
| Fruit              | 0.01 | 0.01 | 0    | 0    | 0    |
| Livestock          | 0.03 | 0.06 | 0.01 | 0    | 0    |
| Oil crops          | 0.02 | 0.05 | 0.01 | 0    | 0    |
| Pulses             | 0.04 | 0.07 | 0.01 | 0    | 0    |
| Roots & tubers     | 0.07 | 0.13 | 0.02 | 0    | 0    |
| Sugar crops        | 0    | 0    | 0    | 0    | 0    |
| Vegetables         | 0    | 0    | 0    | 0    | 0    |
| <b>Netherlands</b> |      |      |      |      |      |
| Cereals            | 0.02 | 0.09 | 0.06 | 0.29 | 0.13 |
| Fiber              | 0    | 0    | 0    | 0    | 0    |
| Fruit              | 0    | 0    | 0    | 0    | 0    |
| Livestock          | 0.03 | 0.21 | 0.15 | 0.4  | 0.1  |
| Oil crops          | 0    | 0    | 0    | 0.02 | 0.01 |
| Pulses             | 0    | 0    | 0    | 0.01 | 0.01 |
| Roots & tubers     | 0.01 | 0.1  | 0.07 | 0.42 | 0.2  |
| Sugar crops        | 0.13 | 0.73 | 0.47 | 2.32 | 1.07 |
| Vegetables         | 0.01 | 0.05 | 0.03 | 0.13 | 0.06 |
| <b>New Zealand</b> |      |      |      |      |      |
| Cereals            | 0    | 0.01 | 0.01 | 0.04 | 0.2  |
| Fiber              | 0    | 0    | 0    | 0    | 0    |
| Fruit              | 0    | 0    | 0    | 0    | 0.01 |
| Livestock          | 0    | 0.03 | 0.04 | 0.18 | 0.62 |
| Oil crops          | 0    | 0    | 0    | 0    | 0.01 |
| Pulses             | 0    | 0    | 0    | 0.01 | 0.07 |
| Roots & tubers     | 0    | 0    | 0    | 0.01 | 0.05 |
| Sugar crops        | 0    | 0    | 0    | 0    | 0    |
| Vegetables         | 0    | 0    | 0    | 0    | 0.01 |
| <b>Nicaragua</b>   |      |      |      |      |      |



|                |      |      |      |      |      |
|----------------|------|------|------|------|------|
| Cereals        | 0.02 | 0.04 | 0.04 | 0.02 | 0.02 |
| Fiber          | 0    | 0    | 0    | 0    | 0    |
| Fruit          | 0    | 0.01 | 0.01 | 0.01 | 0.01 |
| Livestock      | 0    | 0.01 | 0.01 | 0.01 | 0.01 |
| Oil crops      | 0    | 0.01 | 0    | 0    | 0    |
| Pulses         | 0.17 | 0.31 | 0.13 | 0.07 | 0.06 |
| Roots & tubers | 0    | 0.01 | 0.01 | 0    | 0    |
| Sugar crops    | 0    | 0    | 0    | 0    | 0    |
| Vegetables     | 0    | 0    | 0    | 0    | 0    |
| <b>Niger</b>   |      |      |      |      |      |
| Cereals        | 0.93 | 1.29 | 0.1  | 0.28 | 0    |
| Fiber          | 0.01 | 0.01 | 0    | 0    | 0    |
| Fruit          | 0    | 0    | 0    | 0    | 0    |
| Livestock      | 0.02 | 0.03 | 0    | 0    | 0    |
| Oil crops      | 0.02 | 0.02 | 0    | 0    | 0    |
| Pulses         | 0.02 | 0.03 | 0    | 0    | 0    |
| Roots & tubers | 0.01 | 0.02 | 0    | 0    | 0    |
| Sugar crops    | 0    | 0    | 0    | 0    | 0    |
| Vegetables     | 0.03 | 0.04 | 0    | 0.01 | 0    |
| <b>Nigeria</b> |      |      |      |      |      |
| Cereals        | 3.5  | 5.82 | 0.55 | 0.09 | 0    |
| Fiber          | 0.39 | 0.73 | 0.08 | 0    | 0    |
| Fruit          | 0.14 | 0.27 | 0.03 | 0.04 | 0    |
| Livestock      | 0.06 | 0.12 | 0.01 | 0.12 | 0    |
| Oil crops      | 0.72 | 1.33 | 0.14 | 0.14 | 0    |
| Pulses         | 0.02 | 0.03 | 0    | 0    | 0    |
| Roots & tubers | 4.71 | 9.64 | 1.09 | 1.49 | 0    |
| Sugar crops    | 0    | 0    | 0    | 0    | 0    |
| Vegetables     | 0.17 | 0.26 | 0.02 | 0.02 | 0    |
| <b>Norway</b>  |      |      |      |      |      |
| Cereals        | 0.02 | 0.13 | 0.09 | 0.17 | 0.02 |
| Fiber          | 0    | 0    | 0    | 0    | 0    |
| Fruit          | 0    | 0    | 0    | 0    | 0    |
| Livestock      | 0    | 0.03 | 0.02 | 0.05 | 0.01 |
| Oil crops      | 0    | 0.01 | 0.01 | 0.02 | 0    |
| Pulses         | 0    | 0    | 0    | 0    | 0    |
| Roots & tubers | 0    | 0.01 | 0.01 | 0.02 | 0    |
| Sugar crops    | 0    | 0    | 0    | 0    | 0    |
| Vegetables     | 0    | 0    | 0    | 0    | 0    |
| <b>Oman</b>    |      |      |      |      |      |
| Cereals        | 0    | 0    | 0    | 0    | 0    |
| Fiber          | 0    | 0    | 0    | 0    | 0    |
| Fruit          | 0    | 0.02 | 0.01 | 0    | 0    |
| Livestock      | 0    | 0.01 | 0    | 0    | 0    |
| Oil crops      | 0    | 0    | 0    | 0    | 0    |
| Pulses         | 0    | 0    | 0    | 0    | 0    |

|                         |      |      |      |      |       |
|-------------------------|------|------|------|------|-------|
| Roots & tubers          | 0    | 0    | 0    | 0    | 0     |
| Sugar crops             | 0    | 0    | 0    | 0    | 0     |
| Vegetables              | 0    | 0    | 0    | 0    | 0     |
| <b>Pakistan</b>         |      |      |      |      |       |
| Cereals                 | 2.98 | 7.01 | 0.89 | 0.17 | 0     |
| Fiber                   | 3.6  | 9.36 | 1.22 | 0.24 | 0     |
| Fruit                   | 0.11 | 0.27 | 0.03 | 0.01 | 0     |
| Livestock               | 0.63 | 1.08 | 0.12 | 0.02 | 0     |
| Oil crops               | 0.5  | 1.14 | 0.14 | 0.03 | 0     |
| Pulses                  | 0.24 | 0.54 | 0.07 | 0.01 | 0     |
| Roots & tubers          | 0.07 | 0.15 | 0.02 | 0    | 0     |
| Sugar crops             | 0.02 | 0.05 | 0.01 | 0    | 0     |
| Vegetables              | 0.1  | 0.25 | 0.03 | 0.01 | 0     |
| <b>Panama</b>           |      |      |      |      |       |
| Cereals                 | 0    | 0.01 | 0.01 | 0.01 | 0     |
| Fiber                   | 0    | 0    | 0    | 0    | 0     |
| Fruit                   | 0.01 | 0.03 | 0.03 | 0.02 | 0.01  |
| Livestock               | 0.01 | 0.01 | 0.01 | 0    | 0     |
| Oil crops               | 0    | 0    | 0    | 0    | 0     |
| Pulses                  | 0    | 0.01 | 0.01 | 0    | 0     |
| Roots & tubers          | 0    | 0    | 0    | 0    | 0     |
| Sugar crops             | 0    | 0    | 0    | 0    | 0     |
| Vegetables              | 0    | 0    | 0    | 0    | 0     |
| <b>Papua New Guinea</b> |      |      |      |      |       |
| Cereals                 | 0    | 0    | 0    | 0    | 0     |
| Fiber                   | 0    | 0    | 0    | 0    | 0     |
| Fruit                   | 0.04 | 0.05 | 0.02 | 0.01 | 0     |
| Livestock               | 0    | 0    | 0    | 0    | 0     |
| Oil crops               | 0.04 | 0.05 | 0.02 | 0.01 | 0     |
| Pulses                  | 0    | 0    | 0    | 0    | 0     |
| Roots & tubers          | 0.04 | 0.06 | 0.02 | 0.01 | 0     |
| Sugar crops             | 0    | 0    | 0    | 0    | 0     |
| Vegetables              | 0    | 0    | 0    | 0    | 0     |
| <b>Paraguay</b>         |      |      |      |      |       |
| Cereals                 | 0    | 0.03 | 0.04 | 0.09 | 0.47  |
| Fiber                   | 0    | 0.04 | 0.04 | 0.08 | 0.21  |
| Fruit                   | 0    | 0    | 0    | 0.01 | 0.06  |
| Livestock               | 0    | 0.01 | 0.01 | 0.02 | 0.04  |
| Oil crops               | 0.01 | 0.28 | 0.45 | 2.24 | 14.71 |
| Pulses                  | 0    | 0.04 | 0.04 | 0.06 | 0.14  |
| Roots & tubers          | 0    | 0.04 | 0.05 | 0.16 | 0.84  |
| Sugar crops             | 0    | 0    | 0    | 0    | 0     |
| Vegetables              | 0    | 0    | 0    | 0    | 0.01  |
| <b>Peru</b>             |      |      |      |      |       |
| Cereals                 | 0.01 | 0.12 | 0.11 | 0.14 | 0.18  |
| Fiber                   | 0.01 | 0.11 | 0.1  | 0.13 | 0.16  |

|                    |      |      |      |      |      |
|--------------------|------|------|------|------|------|
| Fruit              | 0    | 0.07 | 0.07 | 0.09 | 0.12 |
| Livestock          | 0    | 0.06 | 0.05 | 0.05 | 0.04 |
| Oil crops          | 0    | 0    | 0    | 0    | 0    |
| Pulses             | 0.01 | 0.11 | 0.1  | 0.12 | 0.09 |
| Roots & tubers     | 0.01 | 0.13 | 0.12 | 0.16 | 0.24 |
| Sugar crops        | 0    | 0    | 0    | 0    | 0    |
| Vegetables         | 0    | 0.03 | 0.03 | 0.03 | 0.03 |
| <b>Philippines</b> |      |      |      |      |      |
| Cereals            | 0.39 | 1.08 | 0.09 | 0.84 | 0    |
| Fiber              | 0    | 0    | 0    | 0    | 0    |
| Fruit              | 0.21 | 0.54 | 0.04 | 0.27 | 0    |
| Livestock          | 0.08 | 0.17 | 0.01 | 0.01 | 0    |
| Oil crops          | 0.4  | 1.02 | 0.08 | 0.51 | 0    |
| Pulses             | 0.02 | 0.06 | 0    | 0.03 | 0    |
| Roots & tubers     | 0.11 | 0.29 | 0.02 | 0.04 | 0    |
| Sugar crops        | 0    | 0    | 0    | 0    | 0    |
| Vegetables         | 0.01 | 0.02 | 0    | 0.01 | 0    |
| <b>Poland</b>      |      |      |      |      |      |
| Cereals            | 0.42 | 1.67 | 0.75 | 2.52 | 0.97 |
| Fiber              | 0    | 0    | 0    | 0    | 0    |
| Fruit              | 0    | 0.02 | 0.01 | 0.02 | 0.01 |
| Livestock          | 0.09 | 0.32 | 0.13 | 0.32 | 0.1  |
| Oil crops          | 0.13 | 0.87 | 0.65 | 3.36 | 1.52 |
| Pulses             | 0.03 | 0.1  | 0.04 | 0.1  | 0.03 |
| Roots & tubers     | 0.15 | 0.5  | 0.16 | 0.34 | 0.09 |
| Sugar crops        | 0.45 | 2.1  | 1.18 | 4.55 | 1.82 |
| Vegetables         | 0.02 | 0.07 | 0.03 | 0.07 | 0.02 |
| <b>Portugal</b>    |      |      |      |      |      |
| Cereals            | 0.02 | 0.06 | 0.03 | 0.1  | 0.04 |
| Fiber              | 0    | 0    | 0    | 0    | 0    |
| Fruit              | 0.01 | 0.02 | 0.01 | 0.03 | 0.01 |
| Livestock          | 0.02 | 0.08 | 0.02 | 0.05 | 0.01 |
| Oil crops          | 0    | 0    | 0    | 0.01 | 0    |
| Pulses             | 0    | 0    | 0    | 0.01 | 0    |
| Roots & tubers     | 0.01 | 0.03 | 0.01 | 0.02 | 0    |
| Sugar crops        | 0    | 0.04 | 0.04 | 0.17 | 0.07 |
| Vegetables         | 0.01 | 0.04 | 0.02 | 0.07 | 0.03 |
| <b>Qatar</b>       |      |      |      |      |      |
| Cereals            | 0    | 0    | 0    | 0    | 0    |
| Fiber              | 0    | 0    | 0    | 0    | 0    |
| Fruit              | 0    | 0    | 0    | 0    | 0    |
| Livestock          | 0    | 0    | 0    | 0    | 0    |
| Oil crops          | 0    | 0    | 0    | 0    | 0    |
| Pulses             | 0    | 0    | 0    | 0    | 0    |
| Roots & tubers     | 0    | 0    | 0    | 0    | 0    |
| Sugar crops        | 0    | 0    | 0    | 0    | 0    |

|                           |      |      |      |       |      |
|---------------------------|------|------|------|-------|------|
| Vegetables                | 0    | 0    | 0    | 0     | 0    |
| <b>Republic of Korea</b>  |      |      |      |       |      |
| Cereals                   | 0.23 | 0.32 | 0.01 | 0     | 0    |
| Fiber                     | 0    | 0    | 0    | 0     | 0    |
| Fruit                     | 0.01 | 0.01 | 0    | 0     | 0    |
| Livestock                 | 0.17 | 0.23 | 0.01 | 0     | 0    |
| Oil crops                 | 0.25 | 0.33 | 0.01 | 0     | 0    |
| Pulses                    | 0.01 | 0.02 | 0    | 0     | 0    |
| Roots & tubers            | 0.04 | 0.06 | 0    | 0     | 0    |
| Sugar crops               | 0    | 0    | 0    | 0     | 0    |
| Vegetables                | 0.1  | 0.14 | 0    | 0     | 0    |
| <b>Romania</b>            |      |      |      |       |      |
| Cereals                   | 0.19 | 0.86 | 0.48 | 1.85  | 0.73 |
| Fiber                     | 0    | 0    | 0    | 0     | 0    |
| Fruit                     | 0    | 0.01 | 0    | 0.01  | 0.01 |
| Livestock                 | 0.03 | 0.13 | 0.06 | 0.2   | 0.07 |
| Oil crops                 | 0.11 | 0.55 | 0.35 | 1.57  | 0.66 |
| Pulses                    | 0.02 | 0.06 | 0.03 | 0.08  | 0.03 |
| Roots & tubers            | 0.04 | 0.15 | 0.07 | 0.16  | 0.04 |
| Sugar crops               | 0.06 | 0.22 | 0.09 | 0.27  | 0.1  |
| Vegetables                | 0.01 | 0.04 | 0.02 | 0.07  | 0.03 |
| <b>Russian Federation</b> |      |      |      |       |      |
| Cereals                   | 1.25 | 5.32 | 2.71 | 13.25 | 6.2  |
| Fiber                     | 0    | 0    | 0    | 0     | 0    |
| Fruit                     | 0    | 0.01 | 0    | 0.03  | 0.01 |
| Livestock                 | 0.15 | 0.63 | 0.31 | 1.13  | 0.45 |
| Oil crops                 | 0.41 | 1.91 | 1.09 | 5.93  | 2.87 |
| Pulses                    | 0.15 | 0.64 | 0.32 | 1.28  | 0.55 |
| Roots & tubers            | 0.31 | 1.23 | 0.54 | 1.75  | 0.67 |
| Sugar crops               | 1.08 | 4.08 | 1.77 | 10.38 | 5.33 |
| Vegetables                | 0.03 | 0.12 | 0.06 | 0.25  | 0.11 |
| <b>Rwanda</b>             |      |      |      |       |      |
| Cereals                   | 0.03 | 0.04 | 0    | 0     | 0    |
| Fiber                     | 0    | 0    | 0    | 0     | 0    |
| Fruit                     | 0.14 | 0.22 | 0.02 | 0     | 0    |
| Livestock                 | 0    | 0.01 | 0    | 0     | 0    |
| Oil crops                 | 0.05 | 0.06 | 0    | 0     | 0    |
| Pulses                    | 0.41 | 0.65 | 0.06 | 0     | 0    |
| Roots & tubers            | 0.15 | 0.22 | 0.02 | 0     | 0    |
| Sugar crops               | 0    | 0    | 0    | 0     | 0    |
| Vegetables                | 0    | 0    | 0    | 0     | 0    |
| <b>Saint Lucia</b>        |      |      |      |       |      |
| Cereals                   | 0    | 0    | 0    | 0     | 0    |
| Fiber                     | 0    | 0    | 0    | 0     | 0    |
| Fruit                     | 0    | 0    | 0    | 0     | 0    |
| Livestock                 | 0    | 0    | 0    | 0     | 0    |

|                                         |      |      |      |      |      |
|-----------------------------------------|------|------|------|------|------|
| Oil crops                               | 0    | 0    | 0    | 0    | 0    |
| Pulses                                  | 0    | 0    | 0    | 0    | 0    |
| Roots & tubers                          | 0    | 0    | 0    | 0    | 0    |
| Sugar crops                             | 0    | 0    | 0    | 0    | 0    |
| Vegetables                              | 0    | 0    | 0    | 0    | 0    |
| <b>Saint Vincent and the Grenadines</b> |      |      |      |      |      |
| Cereals                                 | 0    | 0    | 0    | 0    | 0    |
| Fiber                                   | 0    | 0    | 0    | 0    | 0    |
| Fruit                                   | 0    | 0    | 0    | 0    | 0    |
| Livestock                               | 0    | 0    | 0    | 0    | 0    |
| Oil crops                               | 0    | 0    | 0    | 0    | 0    |
| Pulses                                  | 0    | 0    | 0    | 0    | 0    |
| Roots & tubers                          | 0    | 0    | 0    | 0    | 0    |
| Sugar crops                             | 0    | 0    | 0    | 0    | 0    |
| Vegetables                              | 0    | 0    | 0    | 0    | 0    |
| <b>Saudi Arabia</b>                     |      |      |      |      |      |
| Cereals                                 | 0.18 | 0.68 | 0.22 | 0.11 | 0.02 |
| Fiber                                   | 0    | 0    | 0    | 0    | 0    |
| Fruit                                   | 0.02 | 0.08 | 0.02 | 0.01 | 0    |
| Livestock                               | 0.02 | 0.09 | 0.03 | 0.02 | 0    |
| Oil crops                               | 0    | 0    | 0    | 0    | 0    |
| Pulses                                  | 0    | 0    | 0    | 0    | 0    |
| Roots & tubers                          | 0.01 | 0.03 | 0.01 | 0    | 0    |
| Sugar crops                             | 0    | 0    | 0    | 0    | 0    |
| Vegetables                              | 0.01 | 0.04 | 0.01 | 0.01 | 0    |
| <b>Senegal</b>                          |      |      |      |      |      |
| Cereals                                 | 0.15 | 0.3  | 0.03 | 0    | 0    |
| Fiber                                   | 0.02 | 0.08 | 0.01 | 0    | 0    |
| Fruit                                   | 0    | 0.01 | 0    | 0    | 0    |
| Livestock                               | 0.01 | 0.01 | 0    | 0    | 0    |
| Oil crops                               | 0.01 | 0.01 | 0    | 0    | 0    |
| Pulses                                  | 0    | 0    | 0    | 0    | 0    |
| Roots & tubers                          | 0.03 | 0.03 | 0    | 0    | 0    |
| Sugar crops                             | 0    | 0    | 0    | 0    | 0    |
| Vegetables                              | 0.01 | 0.02 | 0    | 0    | 0    |
| <b>Serbia</b>                           |      |      |      |      |      |
| Cereals                                 | 0.17 | 0.61 | 0.24 | 0.63 | 0.21 |
| Fiber                                   | 0    | 0    | 0    | 0    | 0    |
| Fruit                                   | 0    | 0.01 | 0    | 0    | 0    |
| Oil crops                               | 0.14 | 0.56 | 0.24 | 0.69 | 0.23 |
| Pulses                                  | 0.03 | 0.09 | 0.03 | 0.07 | 0.02 |
| Roots & tubers                          | 0.01 | 0.03 | 0.01 | 0.04 | 0.01 |
| Sugar crops                             | 0.34 | 1.08 | 0.3  | 0.71 | 0.24 |
| Vegetables                              | 0    | 0.02 | 0.01 | 0.01 | 0    |
| <b>Sierra Leone</b>                     |      |      |      |      |      |

|                     |      |      |      |      |      |
|---------------------|------|------|------|------|------|
| Cereals             | 0.03 | 0.06 | 0.01 | 0    | 0    |
| Fiber               | 0    | 0    | 0    | 0    | 0    |
| Fruit               | 0    | 0    | 0    | 0    | 0    |
| Livestock           | 0    | 0    | 0    | 0    | 0    |
| Oil crops           | 0    | 0    | 0    | 0    | 0    |
| Pulses              | 0.01 | 0.03 | 0    | 0    | 0    |
| Roots & tubers      | 0.09 | 0.22 | 0.03 | 0    | 0    |
| Sugar crops         | 0    | 0    | 0    | 0    | 0    |
| Vegetables          | 0    | 0    | 0    | 0    | 0    |
| <b>Slovakia</b>     |      |      |      |      |      |
| Cereals             | 0.07 | 0.28 | 0.12 | 0.36 | 0.13 |
| Fiber               | 0    | 0    | 0    | 0    | 0    |
| Fruit               | 0    | 0    | 0    | 0    | 0    |
| Livestock           | 0    | 0.02 | 0.01 | 0.04 | 0.01 |
| Oil crops           | 0.1  | 0.38 | 0.16 | 0.49 | 0.17 |
| Pulses              | 0.01 | 0.02 | 0.01 | 0.03 | 0.01 |
| Roots & tubers      | 0    | 0.01 | 0    | 0.01 | 0    |
| Sugar crops         | 0.07 | 0.29 | 0.15 | 0.45 | 0.15 |
| Vegetables          | 0    | 0    | 0    | 0    | 0    |
| <b>Slovenia</b>     |      |      |      |      |      |
| Cereals             | 0.02 | 0.07 | 0.02 | 0.02 | 0    |
| Fiber               | 0    | 0    | 0    | 0    | 0    |
| Fruit               | 0    | 0    | 0    | 0    | 0    |
| Livestock           | 0.01 | 0.02 | 0.01 | 0.01 | 0    |
| Oil crops           | 0.01 | 0.02 | 0.01 | 0.01 | 0    |
| Pulses              | 0    | 0.01 | 0    | 0    | 0    |
| Roots & tubers      | 0    | 0.01 | 0    | 0    | 0    |
| Sugar crops         | 0.02 | 0.08 | 0.02 | 0.02 | 0    |
| Vegetables          | 0    | 0    | 0    | 0    | 0    |
| <b>Somalia</b>      |      |      |      |      |      |
| Cereals             | 0.02 | 0.03 | 0    | 0    | 0    |
| Fiber               | 0.01 | 0.01 | 0    | 0    | 0    |
| Fruit               | 0    | 0.01 | 0    | 0    | 0    |
| Livestock           | 0.02 | 0.05 | 0    | 0    | 0    |
| Oil crops           | 0.02 | 0.03 | 0    | 0    | 0    |
| Pulses              | 0.03 | 0.04 | 0    | 0    | 0    |
| Roots & tubers      | 0.01 | 0.01 | 0    | 0    | 0    |
| Sugar crops         | 0    | 0    | 0    | 0    | 0    |
| Vegetables          | 0    | 0    | 0    | 0    | 0    |
| <b>South Africa</b> |      |      |      |      |      |
| Cereals             | 0.13 | 0.77 | 0.13 | 1.59 | 0    |
| Fiber               | 0.01 | 0.05 | 0.01 | 0.03 | 0    |
| Fruit               | 0.09 | 0.22 | 0.03 | 0.09 | 0    |
| Livestock           | 0.05 | 0.15 | 0.02 | 0.19 | 0    |
| Oil crops           | 0.23 | 0.78 | 0.11 | 0.6  | 0    |
| Pulses              | 0.01 | 0.09 | 0.02 | 0.12 | 0    |

|                       |      |      |      |      |      |
|-----------------------|------|------|------|------|------|
| Roots & tubers        | 0.03 | 0.11 | 0.02 | 0.08 | 0    |
| Sugar crops           | 0    | 0    | 0    | 0    | 0    |
| Vegetables            | 0.02 | 0.07 | 0.01 | 0.04 | 0    |
| <b>Spain</b>          |      |      |      |      |      |
| Cereals               | 0.27 | 1.23 | 0.66 | 2.24 | 0.83 |
| Fiber                 | 0.01 | 0.05 | 0.04 | 0.25 | 0.13 |
| Fruit                 | 0.05 | 0.21 | 0.09 | 0.32 | 0.13 |
| Livestock             | 0.1  | 0.34 | 0.13 | 0.26 | 0.06 |
| Oil crops             | 0.03 | 0.14 | 0.08 | 0.37 | 0.17 |
| Pulses                | 0.03 | 0.12 | 0.06 | 0.21 | 0.08 |
| Roots & tubers        | 0.02 | 0.09 | 0.04 | 0.12 | 0.04 |
| Sugar crops           | 0.13 | 0.79 | 0.57 | 2.5  | 1.06 |
| Vegetables            | 0.05 | 0.19 | 0.09 | 0.32 | 0.13 |
| <b>Sri Lanka</b>      |      |      |      |      |      |
| Cereals               | 0.07 | 0.14 | 0.02 | 0.05 | 0    |
| Fiber                 | 0    | 0    | 0    | 0    | 0    |
| Fruit                 | 0.02 | 0.04 | 0    | 0.02 | 0    |
| Livestock             | 0.01 | 0.02 | 0    | 0    | 0    |
| Oil crops             | 0.08 | 0.15 | 0.02 | 0.05 | 0    |
| Pulses                | 0.01 | 0.02 | 0    | 0.01 | 0    |
| Roots & tubers        | 0.01 | 0.03 | 0    | 0.01 | 0    |
| Sugar crops           | 0    | 0    | 0    | 0    | 0    |
| Vegetables            | 0.01 | 0.02 | 0    | 0.01 | 0    |
| <b>Sudan (former)</b> |      |      |      |      |      |
| Cereals               | 0.16 | 0.75 | 0.26 | 0.3  | 0.4  |
| Fiber                 | 0.07 | 0.26 | 0.08 | 0.09 | 0.13 |
| Fruit                 | 0.02 | 0.06 | 0.02 | 0.02 | 0.03 |
| Livestock             | 0.05 | 0.2  | 0.06 | 0.05 | 0.06 |
| Oil crops             | 0.05 | 0.16 | 0.04 | 0.04 | 0.06 |
| Pulses                | 0.01 | 0.05 | 0.01 | 0.02 | 0.02 |
| Roots & tubers        | 0.01 | 0.03 | 0.01 | 0.01 | 0.02 |
| Sugar crops           | 0    | 0    | 0    | 0    | 0    |
| Vegetables            | 0.03 | 0.12 | 0.03 | 0.04 | 0.05 |
| <b>Suriname</b>       |      |      |      |      |      |
| Cereals               | 0    | 0    | 0    | 0    | 0.01 |
| Fiber                 | 0    | 0    | 0    | 0    | 0    |
| Fruit                 | 0    | 0    | 0    | 0    | 0.01 |
| Livestock             | 0    | 0    | 0    | 0    | 0    |
| Oil crops             | 0    | 0    | 0    | 0    | 0    |
| Pulses                | 0    | 0    | 0    | 0    | 0    |
| Roots & tubers        | 0    | 0    | 0    | 0    | 0    |
| Sugar crops           | 0    | 0    | 0    | 0    | 0    |
| Vegetables            | 0    | 0    | 0    | 0    | 0    |
| <b>Swaziland</b>      |      |      |      |      |      |
| Cereals               | 0    | 0.01 | 0    | 0    | 0    |
| Fiber                 | 0    | 0    | 0    | 0    | 0    |

|                             |      |      |      |      |      |
|-----------------------------|------|------|------|------|------|
| Fruit                       | 0    | 0.01 | 0    | 0    | 0    |
| Livestock                   | 0    | 0    | 0    | 0    | 0    |
| Oil crops                   | 0    | 0    | 0    | 0    | 0    |
| Pulses                      | 0    | 0    | 0    | 0    | 0    |
| Roots & tubers              | 0    | 0    | 0    | 0    | 0    |
| Sugar crops                 | 0    | 0    | 0    | 0    | 0    |
| Vegetables                  | 0    | 0    | 0    | 0    | 0    |
| <b>Sweden</b>               |      |      |      |      |      |
| Cereals                     | 0.04 | 0.35 | 0.27 | 0.77 | 0.23 |
| Fiber                       | 0    | 0    | 0    | 0    | 0    |
| Fruit                       | 0    | 0    | 0    | 0    | 0    |
| Livestock                   | 0.01 | 0.04 | 0.03 | 0.1  | 0.03 |
| Oil crops                   | 0.02 | 0.18 | 0.13 | 0.36 | 0.1  |
| Pulses                      | 0    | 0.03 | 0.02 | 0.07 | 0.02 |
| Roots & tubers              | 0    | 0.03 | 0.02 | 0.04 | 0.01 |
| Sugar crops                 | 0.08 | 0.55 | 0.37 | 0.75 | 0.13 |
| Vegetables                  | 0    | 0    | 0    | 0    | 0    |
| <b>Switzerland</b>          |      |      |      |      |      |
| Cereals                     | 0.02 | 0.09 | 0.06 | 0.13 | 0.02 |
| Fiber                       | 0    | 0    | 0    | 0    | 0    |
| Fruit                       | 0    | 0    | 0    | 0    | 0    |
| Livestock                   | 0.01 | 0.06 | 0.05 | 0.1  | 0.01 |
| Oil crops                   | 0.02 | 0.09 | 0.04 | 0.08 | 0.01 |
| Pulses                      | 0    | 0.01 | 0.01 | 0.02 | 0    |
| Roots & tubers              | 0    | 0.01 | 0.01 | 0.03 | 0    |
| Sugar crops                 | 0.03 | 0.28 | 0.25 | 0.56 | 0.07 |
| Vegetables                  | 0    | 0    | 0    | 0    | 0    |
| <b>Syrian Arab Republic</b> |      |      |      |      |      |
| Cereals                     | 0.41 | 1.18 | 0.28 | 0.17 | 0.12 |
| Fiber                       | 0.28 | 0.94 | 0.27 | 0.2  | 0.19 |
| Fruit                       | 0.02 | 0.07 | 0.02 | 0.01 | 0.01 |
| Livestock                   | 0.04 | 0.12 | 0.03 | 0.02 | 0.01 |
| Oil crops                   | 0.01 | 0.02 | 0.01 | 0    | 0    |
| Pulses                      | 0    | 0.02 | 0    | 0    | 0    |
| Roots & tubers              | 0.01 | 0.04 | 0.01 | 0.01 | 0.01 |
| Sugar crops                 | 0.2  | 0.6  | 0.15 | 0.09 | 0.05 |
| Vegetables                  | 0.02 | 0.08 | 0.02 | 0.02 | 0.02 |
| <b>Tajikistan</b>           |      |      |      |      |      |
| Cereals                     | 0.03 | 0.15 | 0.05 | 0.04 | 0.04 |
| Fiber                       | 0.11 | 0.47 | 0.16 | 0.14 | 0.15 |
| Fruit                       | 0    | 0    | 0    | 0    | 0    |
| Livestock                   | 0    | 0.01 | 0    | 0.01 | 0.01 |
| Oil crops                   | 0    | 0    | 0    | 0    | 0    |
| Pulses                      | 0    | 0.02 | 0.01 | 0.01 | 0    |
| Roots & tubers              | 0.01 | 0.03 | 0.01 | 0.01 | 0.01 |
| Sugar crops                 | 0    | 0    | 0    | 0    | 0    |



|                                                      |      |      |      |      |      |
|------------------------------------------------------|------|------|------|------|------|
| Vegetables                                           | 0.01 | 0.03 | 0.01 | 0.01 | 0.01 |
| <b>Thailand</b>                                      |      |      |      |      |      |
| Cereals                                              | 0.77 | 2.26 | 0.19 | 0.08 | 0    |
| Fiber                                                | 0.01 | 0.02 | 0    | 0    | 0    |
| Fruit                                                | 0.15 | 0.38 | 0.03 | 0.01 | 0    |
| Livestock                                            | 0.07 | 0.34 | 0.04 | 0.02 | 0    |
| Oil crops                                            | 0.25 | 0.78 | 0.07 | 0.03 | 0    |
| Pulses                                               | 0.16 | 0.31 | 0.02 | 0.01 | 0    |
| Roots & tubers                                       | 0.96 | 3.58 | 0.34 | 0.15 | 0    |
| Sugar crops                                          | 0    | 0    | 0    | 0    | 0    |
| Vegetables                                           | 0.01 | 0.02 | 0    | 0    | 0    |
| <b>The former Yugoslav<br/>Republic of Macedonia</b> |      |      |      |      |      |
| Cereals                                              | 0.01 | 0.06 | 0.03 | 0.07 | 0.01 |
| Fiber                                                | 0    | 0    | 0    | 0    | 0    |
| Fruit                                                | 0    | 0    | 0    | 0    | 0    |
| Livestock                                            | 0    | 0.01 | 0    | 0.01 | 0    |
| Oil crops                                            | 0    | 0    | 0    | 0    | 0    |
| Pulses                                               | 0    | 0.01 | 0.01 | 0.01 | 0    |
| Roots & tubers                                       | 0    | 0.01 | 0    | 0.01 | 0    |
| Sugar crops                                          | 0    | 0.01 | 0    | 0.01 | 0    |
| Vegetables                                           | 0    | 0.01 | 0    | 0.01 | 0    |
| <b>Togo</b>                                          |      |      |      |      |      |
| Cereals                                              | 0.06 | 0.11 | 0.01 | 0    | 0    |
| Fiber                                                | 0.05 | 0.06 | 0    | 0    | 0    |
| Fruit                                                | 0    | 0    | 0    | 0    | 0    |
| Livestock                                            | 0    | 0    | 0    | 0    | 0    |
| Oil crops                                            | 0    | 0    | 0    | 0    | 0    |
| Pulses                                               | 0.08 | 0.15 | 0.02 | 0    | 0    |
| Roots & tubers                                       | 0.1  | 0.17 | 0.02 | 0    | 0    |
| Sugar crops                                          | 0    | 0    | 0    | 0    | 0    |
| Vegetables                                           | 0    | 0    | 0    | 0    | 0    |
| <b>Trinidad and Tobago</b>                           |      |      |      |      |      |
| Cereals                                              | 0    | 0    | 0    | 0    | 0    |
| Fiber                                                | 0    | 0    | 0    | 0    | 0    |
| Fruit                                                | 0    | 0    | 0    | 0    | 0    |
| Livestock                                            | 0    | 0    | 0    | 0    | 0    |
| Oil crops                                            | 0    | 0    | 0    | 0    | 0    |
| Pulses                                               | 0    | 0    | 0    | 0    | 0    |
| Roots & tubers                                       | 0    | 0    | 0    | 0    | 0    |
| Sugar crops                                          | 0    | 0    | 0    | 0    | 0    |
| Vegetables                                           | 0    | 0    | 0    | 0    | 0    |
| <b>Tunisia</b>                                       |      |      |      |      |      |
| Cereals                                              | 0.08 | 0.32 | 0.1  | 0.1  | 0.12 |
| Fiber                                                | 0    | 0    | 0    | 0    | 0    |
| Fruit                                                | 0.01 | 0.02 | 0.01 | 0.01 | 0.01 |

|                     |      |      |      |      |      |
|---------------------|------|------|------|------|------|
| Livestock           | 0.01 | 0.05 | 0.02 | 0.01 | 0.01 |
| Oil crops           | 0    | 0.01 | 0    | 0    | 0    |
| Pulses              | 0    | 0.02 | 0.01 | 0.01 | 0.01 |
| Roots & tubers      | 0    | 0.02 | 0    | 0.01 | 0.01 |
| Sugar crops         | 0    | 0    | 0    | 0    | 0    |
| Vegetables          | 0.01 | 0.04 | 0.02 | 0.03 | 0.05 |
| <b>Turkey</b>       |      |      |      |      |      |
| Cereals             | 1.68 | 5.39 | 1.42 | 1.24 | 1.38 |
| Fiber               | 0.74 | 2.74 | 0.85 | 0.62 | 0.54 |
| Fruit               | 0.08 | 0.25 | 0.06 | 0.05 | 0.05 |
| Livestock           | 0.18 | 0.54 | 0.13 | 0.08 | 0.05 |
| Oil crops           | 0.19 | 0.78 | 0.25 | 0.14 | 0.05 |
| Pulses              | 0.13 | 0.41 | 0.11 | 0.07 | 0.05 |
| Roots & tubers      | 0.12 | 0.28 | 0.05 | 0.03 | 0.03 |
| Sugar crops         | 2.45 | 6.56 | 1.35 | 0.84 | 0.56 |
| Vegetables          | 0.29 | 0.86 | 0.21 | 0.17 | 0.16 |
| <b>Turkmenistan</b> |      |      |      |      |      |
| Cereals             | 0.03 | 0.44 | 0.21 | 0.26 | 0.35 |
| Fiber               | 0.04 | 0.7  | 0.33 | 0.41 | 0.57 |
| Fruit               | 0    | 0    | 0    | 0    | 0    |
| Livestock           | 0    | 0.04 | 0.02 | 0.03 | 0.04 |
| Oil crops           | 0    | 0    | 0    | 0    | 0    |
| Pulses              | 0    | 0.01 | 0.01 | 0.01 | 0.01 |
| Roots & tubers      | 0    | 0.01 | 0    | 0    | 0.01 |
| Sugar crops         | 0    | 0.07 | 0.03 | 0.04 | 0.05 |
| Vegetables          | 0    | 0.02 | 0.01 | 0.01 | 0.02 |
| <b>Uganda</b>       |      |      |      |      |      |
| Cereals             | 0.31 | 0.57 | 0.06 | 0    | 0    |
| Fiber               | 0.04 | 0.09 | 0.01 | 0    | 0    |
| Fruit               | 0.45 | 0.84 | 0.09 | 0    | 0    |
| Livestock           | 0.02 | 0.05 | 0.01 | 0    | 0    |
| Oil crops           | 0.38 | 0.58 | 0.05 | 0    | 0    |
| Pulses              | 0.6  | 1.08 | 0.11 | 0    | 0    |
| Roots & tubers      | 0.47 | 0.89 | 0.1  | 0    | 0    |
| Sugar crops         | 0    | 0    | 0    | 0    | 0    |
| Vegetables          | 0.01 | 0.02 | 0    | 0    | 0    |
| <b>Ukraine</b>      |      |      |      |      |      |
| Cereals             | 0.78 | 3.02 | 1.3  | 3.95 | 1.41 |
| Fiber               | 0    | 0    | 0    | 0    | 0    |
| Fruit               | 0    | 0.01 | 0    | 0.01 | 0    |
| Livestock           | 0.09 | 0.33 | 0.14 | 0.38 | 0.12 |
| Oil crops           | 0.78 | 3.05 | 1.33 | 4.26 | 1.59 |
| Pulses              | 0.07 | 0.34 | 0.19 | 0.69 | 0.25 |
| Roots & tubers      | 0.15 | 0.65 | 0.33 | 0.91 | 0.28 |
| Sugar crops         | 0.78 | 3.52 | 1.87 | 6.63 | 2.55 |
| Vegetables          | 0.02 | 0.09 | 0.04 | 0.13 | 0.05 |

**United Arab Emirates**

|                |      |      |      |      |   |
|----------------|------|------|------|------|---|
| Cereals        | 0    | 0    | 0    | 0    | 0 |
| Fiber          | 0    | 0    | 0    | 0    | 0 |
| Fruit          | 0.01 | 0.06 | 0.02 | 0.01 | 0 |
| Livestock      | 0    | 0.01 | 0    | 0    | 0 |
| Oil crops      | 0    | 0    | 0    | 0    | 0 |
| Pulses         | 0    | 0    | 0    | 0    | 0 |
| Roots & tubers | 0    | 0    | 0    | 0    | 0 |
| Sugar crops    | 0    | 0    | 0    | 0    | 0 |
| Vegetables     | 0    | 0.01 | 0    | 0    | 0 |

**United Kingdom**

|                |      |      |      |      |      |
|----------------|------|------|------|------|------|
| Cereals        | 0.37 | 1.84 | 1.06 | 3.21 | 1.05 |
| Fiber          | 0    | 0    | 0    | 0    | 0    |
| Fruit          | 0    | 0    | 0    | 0    | 0    |
| Livestock      | 0.06 | 0.33 | 0.2  | 0.44 | 0.09 |
| Oil crops      | 0.38 | 1.87 | 1.06 | 3.09 | 0.97 |
| Pulses         | 0.02 | 0.14 | 0.11 | 0.35 | 0.12 |
| Roots & tubers | 0.01 | 0.12 | 0.1  | 0.34 | 0.12 |
| Sugar crops    | 0.11 | 1.04 | 0.86 | 3.2  | 1.18 |
| Vegetables     | 0    | 0.01 | 0.01 | 0.03 | 0.01 |

**United Republic of  
Tanzania**

|                |      |      |      |   |   |
|----------------|------|------|------|---|---|
| Cereals        | 0.3  | 0.79 | 0.1  | 0 | 0 |
| Fiber          | 0.13 | 0.36 | 0.05 | 0 | 0 |
| Fruit          | 0.12 | 0.33 | 0.04 | 0 | 0 |
| Livestock      | 0.03 | 0.07 | 0.01 | 0 | 0 |
| Oil crops      | 0.12 | 0.31 | 0.04 | 0 | 0 |
| Pulses         | 0.98 | 1.87 | 0.2  | 0 | 0 |
| Roots & tubers | 0.33 | 1    | 0.14 | 0 | 0 |
| Sugar crops    | 0    | 0    | 0    | 0 | 0 |
| Vegetables     | 0.01 | 0.02 | 0    | 0 | 0 |

**United States of  
America**

|                |      |       |       |       |        |
|----------------|------|-------|-------|-------|--------|
| Cereals        | 0.01 | 3.64  | 7.79  | 36.43 | 36.61  |
| Fiber          | 0    | 0.96  | 2.27  | 11.51 | 12.2   |
| Fruit          | 0    | 0.17  | 0.23  | 0.7   | 0.92   |
| Livestock      | 0    | 0.82  | 1.28  | 3.46  | 2.32   |
| Oil crops      | 0.02 | 12.03 | 27.76 | 133.6 | 134.96 |
| Pulses         | 0    | 0.33  | 0.66  | 2.8   | 2.56   |
| Roots & tubers | 0    | 0.21  | 0.36  | 1.17  | 0.69   |
| Sugar crops    | 0    | 0.68  | 1.87  | 10.88 | 12.7   |
| Vegetables     | 0    | 0.13  | 0.27  | 1.06  | 0.87   |

**Uruguay**

|           |   |      |      |      |      |
|-----------|---|------|------|------|------|
| Cereals   | 0 | 0.02 | 0.03 | 0.1  | 0.36 |
| Fiber     | 0 | 0    | 0    | 0    | 0    |
| Fruit     | 0 | 0    | 0    | 0.01 | 0.03 |
| Livestock | 0 | 0    | 0.01 | 0.02 | 0.1  |

|                                           |      |      |      |      |      |
|-------------------------------------------|------|------|------|------|------|
| Oil crops                                 | 0    | 0.03 | 0.04 | 0.27 | 2.28 |
| Pulses                                    | 0    | 0    | 0    | 0    | 0.01 |
| Roots & tubers                            | 0    | 0    | 0    | 0    | 0.02 |
| Sugar crops                               | 0    | 0    | 0    | 0    | 0    |
| Vegetables                                | 0    | 0    | 0    | 0    | 0.01 |
| <b>Uzbekistan</b>                         |      |      |      |      |      |
| Cereals                                   | 0.2  | 1.18 | 0.46 | 0.42 | 0.47 |
| Fiber                                     | 0.62 | 3.71 | 1.44 | 1.33 | 1.47 |
| Fruit                                     | 0    | 0.01 | 0    | 0    | 0    |
| Livestock                                 | 0.02 | 0.16 | 0.06 | 0.04 | 0.03 |
| Oil crops                                 | 0    | 0.01 | 0    | 0    | 0    |
| Pulses                                    | 0    | 0    | 0    | 0    | 0    |
| Roots & tubers                            | 0.01 | 0.05 | 0.02 | 0.02 | 0.02 |
| Sugar crops                               | 0    | 0    | 0    | 0    | 0    |
| Vegetables                                | 0.02 | 0.13 | 0.05 | 0.05 | 0.05 |
| <b>Venezuela (Bolivarian Republic of)</b> |      |      |      |      |      |
| Cereals                                   | 0    | 0.05 | 0.05 | 0.12 | 0.41 |
| Fiber                                     | 0    | 0    | 0    | 0.01 | 0.04 |
| Fruit                                     | 0    | 0.01 | 0.02 | 0.04 | 0.16 |
| Livestock                                 | 0    | 0.03 | 0.03 | 0.04 | 0.1  |
| Oil crops                                 | 0    | 0.01 | 0.01 | 0.03 | 0.11 |
| Pulses                                    | 0    | 0.01 | 0.01 | 0.03 | 0.07 |
| Roots & tubers                            | 0    | 0.01 | 0.01 | 0.03 | 0.12 |
| Sugar crops                               | 0    | 0    | 0    | 0    | 0.01 |
| Vegetables                                | 0    | 0.01 | 0.01 | 0.01 | 0.05 |
| <b>Viet Nam</b>                           |      |      |      |      |      |
| Cereals                                   | 0.65 | 1.96 | 0.17 | 0.86 | 0    |
| Fiber                                     | 0.01 | 0.03 | 0    | 0.01 | 0    |
| Fruit                                     | 0.09 | 0.21 | 0.02 | 0.05 | 0    |
| Livestock                                 | 0.07 | 0.11 | 0    | 0.03 | 0    |
| Oil crops                                 | 0.3  | 0.73 | 0.06 | 0.11 | 0    |
| Pulses                                    | 0.2  | 0.44 | 0.03 | 0.04 | 0    |
| Roots & tubers                            | 0.64 | 1.12 | 0.06 | 0.05 | 0    |
| Sugar crops                               | 0    | 0    | 0    | 0    | 0    |
| Vegetables                                | 0.01 | 0.03 | 0    | 0.01 | 0    |
| <b>Yemen</b>                              |      |      |      |      |      |
| Cereals                                   | 0.03 | 0.14 | 0.05 | 0.02 | 0    |
| Fiber                                     | 0.01 | 0.03 | 0.01 | 0    | 0    |
| Fruit                                     | 0.01 | 0.03 | 0.01 | 0    | 0    |
| Livestock                                 | 0.01 | 0.03 | 0.01 | 0    | 0    |
| Oil crops                                 | 0    | 0.01 | 0    | 0    | 0    |
| Pulses                                    | 0    | 0.01 | 0    | 0    | 0    |
| Roots & tubers                            | 0    | 0.02 | 0.01 | 0    | 0    |
| Sugar crops                               | 0    | 0    | 0    | 0    | 0    |
| Vegetables                                | 0.01 | 0.03 | 0.01 | 0.01 | 0    |

|                 |      |      |      |      |   |
|-----------------|------|------|------|------|---|
| <b>Zambia</b>   |      |      |      |      |   |
| Cereals         | 0.07 | 0.18 | 0.02 | 0.04 | 0 |
| Fiber           | 0.04 | 0.1  | 0.01 | 0.16 | 0 |
| Fruit           | 0    | 0    | 0    | 0    | 0 |
| Livestock       | 0.01 | 0.01 | 0    | 0    | 0 |
| Oil crops       | 0.05 | 0.17 | 0.02 | 0.02 | 0 |
| Pulses          | 0    | 0.01 | 0    | 0    | 0 |
| Roots & tubers  | 0.1  | 0.14 | 0.01 | 0.01 | 0 |
| Sugar crops     | 0    | 0    | 0    | 0    | 0 |
| Vegetables      | 0    | 0    | 0    | 0    | 0 |
| <b>Zimbabwe</b> |      |      |      |      |   |
| Cereals         | 0.06 | 0.25 | 0.04 | 0.02 | 0 |
| Fiber           | 0.06 | 0.35 | 0.06 | 0.03 | 0 |
| Fruit           | 0    | 0.03 | 0    | 0    | 0 |
| Livestock       | 0.01 | 0.02 | 0    | 0    | 0 |
| Oil crops       | 0.09 | 0.2  | 0.02 | 0.01 | 0 |
| Pulses          | 0.02 | 0.08 | 0.01 | 0    | 0 |
| Roots & tubers  | 0.02 | 0.03 | 0    | 0    | 0 |
| Sugar crops     | 0    | 0    | 0    | 0    | 0 |
| Vegetables      | 0    | 0    | 0    | 0    | 0 |

#### Iron production (T)

|                    | < 2 ha | 2 - 20 ha | 20 - 50 ha | 50 - 200 ha | > 200 ha |
|--------------------|--------|-----------|------------|-------------|----------|
| <b>Afghanistan</b> |        |           |            |             |          |
| Cereals            | 35.15  | 86.1      | 11.13      | 36.5        | 0        |
| Fiber              | 0.05   | 1.45      | 0.26       | 0.05        | 0        |
| Fruit              | 0.13   | 0.96      | 0.16       | 0.03        | 0        |
| Livestock          | 2.37   | 3.04      | 0.28       | 0.05        | 0        |
| Oil crops          | 2.13   | 2.71      | 0.24       | 0.04        | 0        |
| Pulses             | 0.1    | 0.21      | 0.03       | 0.05        | 0        |
| Roots & tubers     | 0.45   | 0.99      | 0.12       | 0.19        | 0        |
| Sugar crops        | 0.02   | 0.04      | 0          | 0           | 0        |
| Vegetables         | 0      | 0         | 0          | 0           | 0        |
| <b>Albania</b>     |        |           |            |             |          |
| Cereals            | 2.82   | 8.8       | 2.19       | 2.14        | 0.1      |
| Fiber              | 0      | 0.02      | 0.01       | 0.02        | 0        |
| Fruit              | 0.06   | 0.22      | 0.09       | 0.11        | 0.01     |
| Livestock          | 0.5    | 1.4       | 0.24       | 0.14        | 0.01     |
| Oil crops          | 0.13   | 0.48      | 0.17       | 0.21        | 0.01     |
| Pulses             | 0.26   | 0.77      | 0.16       | 0.12        | 0.01     |
| Roots & tubers     | 0.15   | 0.49      | 0.14       | 0.16        | 0.01     |
| Sugar crops        | 0.05   | 0.15      | 0.04       | 0.04        | 0        |
| Vegetables         | 0.07   | 0.25      | 0.08       | 0.09        | 0        |
| <b>Algeria</b>     |        |           |            |             |          |
| Cereals            | 15.08  | 56.1      | 16.63      | 19.06       | 25.85    |
| Fiber              | 0      | 0         | 0          | 0           | 0        |

|                  |      |       |        |        |         |
|------------------|------|-------|--------|--------|---------|
| Fruit            | 0.81 | 3.26  | 1.09   | 0.58   | 0.2     |
| Livestock        | 1.42 | 5.74  | 1.81   | 1.39   | 1.22    |
| Oil crops        | 1.46 | 4.51  | 1.13   | 1.69   | 2.71    |
| Pulses           | 0.04 | 0.13  | 0.04   | 0.05   | 0.07    |
| Roots & tubers   | 1.62 | 5.24  | 1.38   | 1.4    | 1.76    |
| Sugar crops      | 0    | 0     | 0      | 0      | 0       |
| Vegetables       | 0.42 | 1.74  | 0.56   | 0.38   | 0.25    |
| <b>Angola</b>    |      |       |        |        |         |
| Cereals          | 6.58 | 13.24 | 1.48   | 0.84   | 0       |
| Fiber            | 0.05 | 0.12  | 0.01   | 0.02   | 0       |
| Fruit            | 0.62 | 1.18  | 0.13   | 0.09   | 0       |
| Livestock        | 0.76 | 1.19  | 0.1    | 0.08   | 0       |
| Oil crops        | 0.45 | 0.71  | 0.06   | 0.04   | 0       |
| Pulses           | 1.48 | 3.4   | 0.42   | 0.42   | 0       |
| Roots & tubers   | 6.97 | 15.97 | 1.96   | 1.44   | 0       |
| Sugar crops      | 0.06 | 0.13  | 0.02   | 0.01   | 0       |
| Vegetables       | 0.01 | 0.02  | 0      | 0      | 0       |
| <b>Argentina</b> |      |       |        |        |         |
| Cereals          | 0.56 | 14.91 | 24.86  | 138.4  | 995.79  |
| Fiber            | 0.07 | 1.21  | 1.31   | 3.59   | 19.23   |
| Fruit            | 0    | 0.11  | 0.25   | 1.58   | 10.47   |
| Livestock        | 0.2  | 3.55  | 4.2    | 11.7   | 45.3    |
| Oil crops        | 2.53 | 70.19 | 119.62 | 732.61 | 5795.23 |
| Pulses           | 0.02 | 0.54  | 0.87   | 3.39   | 13.16   |
| Roots & tubers   | 0.03 | 0.62  | 0.89   | 2.94   | 8.54    |
| Sugar crops      | 0.03 | 0.65  | 1      | 3.33   | 7.46    |
| Vegetables       | 0    | 0.06  | 0.09   | 0.43   | 2.47    |
| <b>Armenia</b>   |      |       |        |        |         |
| Cereals          | 0.94 | 6.88  | 2.84   | 1.5    | 0.26    |
| Fiber            | 0    | 0     | 0      | 0      | 0       |
| Fruit            | 0.06 | 0.47  | 0.19   | 0.1    | 0.02    |
| Livestock        | 0.17 | 0.88  | 0.33   | 0.17   | 0.03    |
| Oil crops        | 0    | 0     | 0      | 0      | 0       |
| Pulses           | 0.02 | 0.14  | 0.06   | 0.03   | 0.01    |
| Roots & tubers   | 0.25 | 1.82  | 0.75   | 0.4    | 0.07    |
| Sugar crops      | 0.01 | 0.07  | 0.03   | 0.01   | 0       |
| Vegetables       | 0.06 | 0.46  | 0.19   | 0.1    | 0.02    |
| <b>Australia</b> |      |       |        |        |         |
| Cereals          | 0    | 1.68  | 7.21   | 67.1   | 891.57  |
| Fiber            | 0    | 0.08  | 0.36   | 3.53   | 62.41   |
| Fruit            | 0    | 0.01  | 0.05   | 0.49   | 7.09    |
| Livestock        | 0    | 0.14  | 0.58   | 5.24   | 53.21   |
| Oil crops        | 0    | 0.4   | 1.7    | 15.33  | 161.4   |
| Pulses           | 0    | 0.02  | 0.09   | 0.89   | 17.21   |
| Roots & tubers   | 0    | 0.02  | 0.08   | 0.75   | 6.66    |
| Sugar crops      | 0    | 0.02  | 0.15   | 1.34   | 17.04   |

|                   |       |        |       |       |       |
|-------------------|-------|--------|-------|-------|-------|
| Vegetables        | 0     | 0      | 0.01  | 0.12  | 1.26  |
| <b>Austria</b>    |       |        |       |       |       |
| Cereals           | 12.46 | 51.28  | 24.1  | 43.8  | 5.21  |
| Fiber             | 0     | 0      | 0     | 0     | 0     |
| Fruit             | 0.2   | 0.71   | 0.26  | 0.41  | 0.04  |
| Livestock         | 0.57  | 3.17   | 2.01  | 3.95  | 0.47  |
| Oil crops         | 3.29  | 12.57  | 5.31  | 9.3   | 1.11  |
| Pulses            | 0.36  | 1.45   | 0.66  | 1.19  | 0.14  |
| Roots & tubers    | 0.5   | 1.78   | 0.64  | 1.02  | 0.11  |
| Sugar crops       | 1.99  | 7.16   | 2.71  | 4.51  | 0.53  |
| Vegetables        | 0.03  | 0.11   | 0.05  | 0.09  | 0.01  |
| <b>Azerbaijan</b> |       |        |       |       |       |
| Cereals           | 10.75 | 34.55  | 9.3   | 7.39  | 7.42  |
| Fiber             | 1.19  | 3.82   | 1.03  | 0.82  | 0.82  |
| Fruit             | 0.08  | 0.26   | 0.07  | 0.05  | 0.05  |
| Livestock         | 0.5   | 1.75   | 0.51  | 0.43  | 0.46  |
| Oil crops         | 0.07  | 0.23   | 0.06  | 0.05  | 0.05  |
| Pulses            | 0.11  | 0.49   | 0.17  | 0.11  | 0.07  |
| Roots & tubers    | 0.95  | 3.03   | 0.81  | 0.64  | 0.65  |
| Sugar crops       | 0.11  | 0.36   | 0.1   | 0.08  | 0.07  |
| Vegetables        | 0.23  | 0.76   | 0.21  | 0.13  | 0.09  |
| <b>Bangladesh</b> |       |        |       |       |       |
| Cereals           | 94.54 | 205.91 | 25.34 | 49.26 | 0     |
| Fiber             | 0.71  | 1.6    | 0.2   | 0.22  | 0     |
| Fruit             | 0.47  | 1.05   | 0.13  | 0.3   | 0     |
| Livestock         | 3.91  | 7.45   | 0.84  | 0.98  | 0     |
| Oil crops         | 8.69  | 25.41  | 3.51  | 5.79  | 0     |
| Pulses            | 0.91  | 2.08   | 0.26  | 0.57  | 0     |
| Roots & tubers    | 7.64  | 15.98  | 1.93  | 5.82  | 0     |
| Sugar crops       | 0.74  | 1.55   | 0.19  | 0.47  | 0     |
| Vegetables        | 0.44  | 0.96   | 0.12  | 0.22  | 0     |
| <b>Belarus</b>    |       |        |       |       |       |
| Cereals           | 14.04 | 53.35  | 22.24 | 64.36 | 22.5  |
| Fiber             | 0     | 0      | 0     | 0     | 0     |
| Fruit             | 0.01  | 0.07   | 0.05  | 0.18  | 0.06  |
| Livestock         | 0.64  | 2.99   | 1.64  | 5.36  | 1.92  |
| Oil crops         | 2.16  | 8.19   | 3.42  | 9.8   | 3.37  |
| Pulses            | 0.59  | 2.26   | 0.94  | 2.7   | 0.93  |
| Roots & tubers    | 0.9   | 8.12   | 6.59  | 24.51 | 9.13  |
| Sugar crops       | 0.36  | 3.42   | 2.84  | 11.05 | 4.24  |
| Vegetables        | 0.07  | 0.29   | 0.13  | 0.34  | 0.11  |
| <b>Belgium</b>    |       |        |       |       |       |
| Cereals           | 6.76  | 25.19  | 10.35 | 34.05 | 13.16 |
| Fiber             | 0     | 0      | 0     | 0     | 0     |
| Fruit             | 0.03  | 0.12   | 0.05  | 0.13  | 0.04  |
| Livestock         | 2.02  | 7.03   | 2.42  | 4.94  | 1.31  |

|                                         |      |       |      |       |        |
|-----------------------------------------|------|-------|------|-------|--------|
| Oil crops                               | 0.01 | 0.28  | 0.32 | 2.94  | 1.61   |
| Pulses                                  | 0.01 | 0.06  | 0.03 | 0.08  | 0.02   |
| Roots & tubers                          | 2.2  | 7.34  | 2.33 | 4.01  | 0.81   |
| Sugar crops                             | 2.17 | 9.13  | 4.45 | 14.59 | 5.38   |
| Vegetables                              | 0.06 | 0.22  | 0.09 | 0.23  | 0.08   |
| <b>Belize</b>                           |      |       |      |       |        |
| Cereals                                 | 0.03 | 0.23  | 0.6  | 0.26  | 0.12   |
| Fiber                                   | 0    | 0     | 0    | 0     | 0      |
| Fruit                                   | 0.01 | 0.07  | 0.18 | 0.08  | 0.03   |
| Livestock                               | 0.01 | 0.02  | 0.04 | 0.02  | 0.02   |
| Oil crops                               | 0    | 0.02  | 0.04 | 0.02  | 0.01   |
| Pulses                                  | 0    | 0.05  | 0.12 | 0.06  | 0.03   |
| Roots & tubers                          | 0    | 0     | 0    | 0     | 0      |
| Sugar crops                             | 0.01 | 0.1   | 0.26 | 0.12  | 0.06   |
| Vegetables                              | 0    | 0     | 0    | 0     | 0      |
| <b>Benin</b>                            |      |       |      |       |        |
| Cereals                                 | 9.93 | 15.91 | 1.48 | 0.01  | 0      |
| Fiber                                   | 3.03 | 9.65  | 1.38 | 0.01  | 0      |
| Fruit                                   | 0.07 | 0.12  | 0.01 | 0     | 0      |
| Livestock                               | 0.28 | 0.44  | 0.04 | 0     | 0      |
| Oil crops                               | 1.18 | 1.77  | 0.15 | 0     | 0      |
| Pulses                                  | 2.18 | 3.75  | 0.37 | 0     | 0      |
| Roots & tubers                          | 7.02 | 8.79  | 0.55 | 0     | 0      |
| Sugar crops                             | 0.01 | 0.01  | 0    | 0     | 0      |
| Vegetables                              | 0.13 | 0.2   | 0.02 | 0     | 0      |
| <b>Bhutan</b>                           |      |       |      |       |        |
| Cereals                                 | 1.39 | 2.04  | 0.19 | 0.04  | 0      |
| Fiber                                   | 0    | 0     | 0    | 0     | 0      |
| Fruit                                   | 0.02 | 0.02  | 0    | 0     | 0      |
| Livestock                               | 0.04 | 0.06  | 0.01 | 0     | 0      |
| Oil crops                               | 0.09 | 0.13  | 0.01 | 0     | 0      |
| Pulses                                  | 0.15 | 0.18  | 0.02 | 0     | 0      |
| Roots & tubers                          | 0.14 | 0.19  | 0.02 | 0     | 0      |
| Sugar crops                             | 0    | 0     | 0    | 0     | 0      |
| Vegetables                              | 0    | 0     | 0    | 0     | 0      |
| <b>Bolivia (Plurinational State of)</b> |      |       |      |       |        |
| Cereals                                 | 0.2  | 3.34  | 3.57 | 7.96  | 26.92  |
| Fiber                                   | 0.02 | 0.29  | 0.32 | 0.89  | 4.32   |
| Fruit                                   | 0.04 | 0.54  | 0.48 | 0.53  | 0.65   |
| Livestock                               | 0.05 | 0.79  | 0.82 | 1.6   | 3.45   |
| Oil crops                               | 0.21 | 4.9   | 7.57 | 35.23 | 212.47 |
| Pulses                                  | 0.02 | 0.31  | 0.29 | 0.47  | 1.26   |
| Roots & tubers                          | 0.08 | 1.18  | 1.09 | 1.38  | 1.54   |
| Sugar crops                             | 0    | 0.09  | 0.12 | 0.43  | 2.31   |
| Vegetables                              | 0    | 0.03  | 0.03 | 0.06  | 0.24   |



**Bosnia and Herzegovina**

|                |      |       |      |      |      |
|----------------|------|-------|------|------|------|
| Cereals        | 3.69 | 14.05 | 6.02 | 11   | 1.41 |
| Fiber          | 0    | 0     | 0    | 0    | 0    |
| Fruit          | 0.01 | 0.05  | 0.02 | 0.05 | 0.01 |
| Livestock      | 0.1  | 0.41  | 0.21 | 0.4  | 0.05 |
| Oil crops      | 0.17 | 0.73  | 0.37 | 0.75 | 0.1  |
| Pulses         | 0.1  | 0.38  | 0.16 | 0.3  | 0.04 |
| Roots & tubers | 0.25 | 0.96  | 0.4  | 0.74 | 0.09 |
| Sugar crops    | 0    | 0     | 0    | 0    | 0    |
| Vegetables     | 0.02 | 0.06  | 0.03 | 0.05 | 0.01 |

**Botswana**

|                |      |      |      |      |   |
|----------------|------|------|------|------|---|
| Cereals        | 0.13 | 0.62 | 0.1  | 0.32 | 0 |
| Fiber          | 0.02 | 0.08 | 0.01 | 0.02 | 0 |
| Fruit          | 0    | 0    | 0    | 0    | 0 |
| Livestock      | 0.08 | 0.42 | 0.07 | 0.24 | 0 |
| Oil crops      | 0.02 | 0.07 | 0.01 | 0.04 | 0 |
| Pulses         | 0.01 | 0.03 | 0.01 | 0.03 | 0 |
| Roots & tubers | 0    | 0    | 0    | 0    | 0 |
| Sugar crops    | 0    | 0    | 0    | 0    | 0 |
| Vegetables     | 0    | 0    | 0    | 0    | 0 |

**Brazil**

|                |      |       |        |        |        |
|----------------|------|-------|--------|--------|--------|
| Cereals        | 3.18 | 55.73 | 63     | 194.63 | 1139.9 |
| Fiber          | 0.05 | 1.59  | 2.89   | 19.9   | 167.79 |
| Fruit          | 0.27 | 4.19  | 4.01   | 6.55   | 18.99  |
| Livestock      | 1.3  | 21.19 | 21.55  | 43.56  | 153.21 |
| Oil crops      | 2.55 | 69.65 | 117.63 | 828.43 | 7482.5 |
| Pulses         | 1.76 | 27.49 | 25.57  | 37.04  | 93.21  |
| Roots & tubers | 0.66 | 10.51 | 10.24  | 17.17  | 43.8   |
| Sugar crops    | 0.12 | 3.38  | 5.87   | 31.17  | 201.14 |
| Vegetables     | 0.06 | 0.98  | 1      | 1.99   | 6.79   |

**Brunei Darussalam**

|                |   |      |      |      |   |
|----------------|---|------|------|------|---|
| Cereals        | 0 | 0.01 | 0    | 0    | 0 |
| Fiber          | 0 | 0    | 0    | 0    | 0 |
| Fruit          | 0 | 0    | 0    | 0    | 0 |
| Livestock      | 0 | 0.18 | 0.03 | 0.01 | 0 |
| Oil crops      | 0 | 0    | 0    | 0    | 0 |
| Pulses         | 0 | 0    | 0    | 0    | 0 |
| Roots & tubers | 0 | 0.01 | 0    | 0    | 0 |
| Sugar crops    | 0 | 0    | 0    | 0    | 0 |
| Vegetables     | 0 | 0    | 0    | 0    | 0 |

**Bulgaria**

|           |      |       |       |       |       |
|-----------|------|-------|-------|-------|-------|
| Cereals   | 5.76 | 32.27 | 20.94 | 74.2  | 27.15 |
| Fiber     | 0.01 | 0.04  | 0     | 0     | 0     |
| Fruit     | 0.13 | 0.43  | 0.15  | 0.33  | 0.09  |
| Livestock | 0.36 | 1.46  | 0.66  | 1.47  | 0.36  |
| Oil crops | 0.7  | 5.12  | 3.91  | 16.54 | 6.75  |

|                     |       |        |        |        |        |
|---------------------|-------|--------|--------|--------|--------|
| Pulses              | 0.03  | 0.13   | 0.07   | 0.23   | 0.08   |
| Roots & tubers      | 0.15  | 0.65   | 0.35   | 0.78   | 0.13   |
| Sugar crops         | 0     | 0.02   | 0.02   | 0.07   | 0.02   |
| Vegetables          | 0.03  | 0.11   | 0.05   | 0.17   | 0.06   |
| <b>Burkina Faso</b> |       |        |        |        |        |
| Cereals             | 27.78 | 55.37  | 6.14   | 15.84  | 0      |
| Fiber               | 8.75  | 16.21  | 1.77   | 6.58   | 0      |
| Fruit               | 0     | 0      | 0      | 0      | 0      |
| Livestock           | 1.43  | 1.99   | 0.15   | 0.33   | 0      |
| Oil crops           | 0.58  | 1.71   | 0.24   | 1.66   | 0      |
| Pulses              | 0.09  | 0.12   | 0.01   | 0.03   | 0      |
| Roots & tubers      | 0.09  | 0.2    | 0.02   | 0.11   | 0      |
| Sugar crops         | 0.02  | 0.08   | 0.01   | 0.12   | 0      |
| Vegetables          | 0.01  | 0.01   | 0      | 0      | 0      |
| <b>Burundi</b>      |       |        |        |        |        |
| Cereals             | 3.26  | 3.93   | 0.2    | 0      | 0      |
| Fiber               | 0.12  | 0.14   | 0.01   | 0      | 0      |
| Fruit               | 1.21  | 1.45   | 0.08   | 0      | 0      |
| Livestock           | 0.16  | 0.19   | 0.01   | 0      | 0      |
| Oil crops           | 0.19  | 0.23   | 0.01   | 0      | 0      |
| Pulses              | 6.02  | 7.25   | 0.37   | 0      | 0      |
| Roots & tubers      | 2.34  | 2.82   | 0.15   | 0      | 0      |
| Sugar crops         | 0.03  | 0.03   | 0      | 0      | 0      |
| Vegetables          | 0     | 0      | 0      | 0      | 0      |
| <b>Cambodia</b>     |       |        |        |        |        |
| Cereals             | 17.91 | 39.25  | 2.57   | 1.04   | 0      |
| Fiber               | 0     | 0.01   | 0      | 0      | 0      |
| Fruit               | 0.09  | 0.19   | 0.01   | 0      | 0      |
| Livestock           | 0.78  | 1.4    | 0.07   | 0.02   | 0      |
| Oil crops           | 10.44 | 17.48  | 0.89   | 0.34   | 0      |
| Pulses              | 1.09  | 1.84   | 0.09   | 0.03   | 0      |
| Roots & tubers      | 1.34  | 2.39   | 0.13   | 0.05   | 0      |
| Sugar crops         | 0.03  | 0.05   | 0      | 0      | 0      |
| Vegetables          | 0     | 0      | 0      | 0      | 0      |
| <b>Cameroon</b>     |       |        |        |        |        |
| Cereals             | 22.8  | 34.74  | 2.96   | 2.36   | 0      |
| Fiber               | 5.45  | 9.05   | 0.86   | 0.3    | 0      |
| Fruit               | 3.57  | 5.61   | 0.49   | 0.6    | 0      |
| Livestock           | 1.27  | 1.56   | 0.1    | 0      | 0      |
| Oil crops           | 0.87  | 1.39   | 0.13   | 0.05   | 0      |
| Pulses              | 6.24  | 7.57   | 0.43   | 0      | 0      |
| Roots & tubers      | 2.7   | 4.68   | 0.46   | 1.51   | 0      |
| Sugar crops         | 0.2   | 0.3    | 0.02   | 0.07   | 0      |
| Vegetables          | 0.55  | 0.81   | 0.06   | 0.03   | 0      |
| <b>Canada</b>       |       |        |        |        |        |
| Cereals             | 0.56  | 130.19 | 206.38 | 653.95 | 689.59 |

|                                 |         |         |        |        |        |
|---------------------------------|---------|---------|--------|--------|--------|
| Fiber                           | 0       | 0       | 0      | 0      | 0      |
| Fruit                           | 0       | 0.05    | 0.1    | 0.33   | 0.18   |
| Livestock                       | 0.02    | 4.6     | 8.22   | 22.71  | 13.45  |
| Oil crops                       | 0.79    | 178.88  | 273.92 | 760.93 | 746.27 |
| Pulses                          | 0.05    | 12.11   | 18.76  | 58.78  | 64.57  |
| Roots & tubers                  | 0.01    | 3.33    | 5.46   | 12.16  | 7.36   |
| Sugar crops                     | 0       | 0.13    | 0.21   | 1.58   | 2.69   |
| Vegetables                      | 0       | 0.19    | 0.4    | 1.17   | 0.65   |
| <b>Central African Republic</b> |         |         |        |        |        |
| Cereals                         | 2.4     | 3.19    | 0.22   | 0      | 0      |
| Fiber                           | 0.07    | 0.08    | 0      | 0      | 0      |
| Fruit                           | 0.2     | 0.33    | 0.03   | 0      | 0      |
| Oil crops                       | 2.46    | 3.32    | 0.24   | 0      | 0      |
| Pulses                          | 0.09    | 0.16    | 0.02   | 0      | 0      |
| Roots & tubers                  | 1.27    | 1.67    | 0.11   | 0      | 0      |
| Sugar crops                     | 0.02    | 0.03    | 0      | 0      | 0      |
| Vegetables                      | 0       | 0       | 0      | 0      | 0      |
| <b>Chad</b>                     |         |         |        |        |        |
| Cereals                         | 14.96   | 27.3    | 2.85   | 12.3   | 0      |
| Fiber                           | 2.35    | 4.4     | 0.47   | 0.75   | 0      |
| Fruit                           | 0.03    | 0.06    | 0.01   | 0.04   | 0      |
| Livestock                       | 0.73    | 1.13    | 0.1    | 0.22   | 0      |
| Oil crops                       | 1.73    | 2.74    | 0.25   | 0.61   | 0      |
| Pulses                          | 1.5     | 2.62    | 0.26   | 0.83   | 0      |
| Roots & tubers                  | 0.7     | 1.34    | 0.14   | 0.41   | 0      |
| Sugar crops                     | 0.06    | 0.11    | 0.01   | 0.02   | 0      |
| Vegetables                      | 0.01    | 0.02    | 0      | 0.01   | 0      |
| <b>Chile</b>                    |         |         |        |        |        |
| Cereals                         | 0.62    | 10.13   | 10.39  | 20.89  | 67.42  |
| Fiber                           | 0       | 0       | 0      | 0      | 0      |
| Fruit                           | 0.05    | 0.87    | 0.87   | 1.71   | 6.01   |
| Livestock                       | 0.09    | 1.4     | 1.4    | 2.59   | 7.88   |
| Oil crops                       | 0.04    | 0.72    | 0.72   | 1.41   | 4.96   |
| Pulses                          | 0.02    | 0.27    | 0.25   | 0.4    | 1.33   |
| Roots & tubers                  | 0.03    | 0.43    | 0.48   | 1.16   | 4.46   |
| Sugar crops                     | 0.07    | 1.21    | 1.21   | 2.38   | 8.33   |
| Vegetables                      | 0.02    | 0.31    | 0.32   | 0.62   | 2.17   |
| <b>China</b>                    |         |         |        |        |        |
| Cereals                         | 5222.82 | 2655.24 | 0      | 1510.1 | 0      |
| Fiber                           | 477.98  | 344.35  | 0      | 262.21 | 0      |
| Fruit                           | 40.17   | 19.57   | 0      | 8.27   | 0      |
| Livestock                       | 590.92  | 238.99  | 0      | 102.38 | 0      |
| Oil crops                       | 2176.76 | 1329.89 | 0      | 775.85 | 0      |
| Pulses                          | 80.29   | 39.23   | 0      | 27.66  | 0      |
| Roots & tubers                  | 547.23  | 161.03  | 0      | 51.86  | 0      |
| Sugar crops                     | 44.83   | 39.54   | 0      | 14.67  | 0      |

|                   |       |       |       |       |       |
|-------------------|-------|-------|-------|-------|-------|
| Vegetables        | 71.62 | 33.54 | 0     | 14.23 | 0     |
| <b>Colombia</b>   |       |       |       |       |       |
| Cereals           | 0.13  | 2.6   | 3.41  | 11.43 | 49.78 |
| Fiber             | 0.05  | 0.85  | 0.83  | 1.38  | 3.59  |
| Fruit             | 0.07  | 1.24  | 1.39  | 3.32  | 10.18 |
| Livestock         | 0.23  | 3.7   | 3.63  | 6.22  | 15.43 |
| Oil crops         | 0.05  | 0.76  | 0.75  | 1.58  | 7.61  |
| Pulses            | 0.07  | 1.11  | 1.19  | 2.43  | 5.53  |
| Roots & tubers    | 0.16  | 2.59  | 2.55  | 4.25  | 8.94  |
| Sugar crops       | 0.14  | 2.3   | 2.31  | 4.16  | 9.85  |
| Vegetables        | 0.01  | 0.22  | 0.22  | 0.37  | 0.95  |
| <b>Congo</b>      |       |       |       |       |       |
| Cereals           | 0.2   | 0.3   | 0.03  | 0     | 0     |
| Fiber             | 0     | 0     | 0     | 0     | 0     |
| Fruit             | 0.1   | 0.24  | 0.03  | 0.03  | 0     |
| Livestock         | 0.04  | 0.08  | 0.01  | 0.03  | 0     |
| Oil crops         | 0.03  | 0.05  | 0     | 0.01  | 0     |
| Pulses            | 0.15  | 0.26  | 0.02  | 0.04  | 0     |
| Roots & tubers    | 0.82  | 1.51  | 0.16  | 0.06  | 0     |
| Sugar crops       | 0.1   | 0.15  | 0.01  | 0.02  | 0     |
| Vegetables        | 0     | 0.01  | 0     | 0     | 0     |
| <b>Costa Rica</b> |       |       |       |       |       |
| Cereals           | 0     | 0.13  | 0.5   | 0.47  | 0.79  |
| Fiber             | 0     | 0     | 0.01  | 0.01  | 0.02  |
| Fruit             | 0.01  | 0.47  | 1.77  | 1.66  | 2.81  |
| Livestock         | 0.01  | 0.15  | 0.51  | 0.7   | 1.76  |
| Oil crops         | 0     | 0.02  | 0.09  | 0.08  | 0.14  |
| Pulses            | 0     | 0.04  | 0.15  | 0.14  | 0.24  |
| Roots & tubers    | 0     | 0.05  | 0.2   | 0.18  | 0.31  |
| Sugar crops       | 0     | 0.15  | 0.58  | 0.54  | 0.92  |
| Vegetables        | 0     | 0.01  | 0.05  | 0.05  | 0.08  |
| <b>Croatia</b>    |       |       |       |       |       |
| Cereals           | 7.54  | 27.21 | 10.56 | 29.84 | 10.28 |
| Fiber             | 0     | 0     | 0     | 0     | 0     |
| Fruit             | 0.08  | 0.26  | 0.09  | 0.22  | 0.08  |
| Livestock         | 0.26  | 0.9   | 0.32  | 0.92  | 0.33  |
| Oil crops         | 2.69  | 9.36  | 3.4   | 9.5   | 3.32  |
| Pulses            | 0.02  | 0.09  | 0.03  | 0.1   | 0.03  |
| Roots & tubers    | 0.16  | 0.56  | 0.2   | 0.54  | 0.19  |
| Sugar crops       | 0.81  | 2.9   | 1.12  | 3.23  | 1.13  |
| Vegetables        | 0.01  | 0.04  | 0.02  | 0.05  | 0.02  |
| <b>Cuba</b>       |       |       |       |       |       |
| Cereals           | 1.33  | 3.01  | 2.88  | 2.09  | 3.27  |
| Fiber             | 0     | 0     | 0     | 0     | 0     |
| Fruit             | 0.31  | 0.7   | 0.68  | 0.51  | 0.83  |
| Livestock         | 0.13  | 0.48  | 0.92  | 0.77  | 1.45  |

|                                         |       |       |       |        |       |
|-----------------------------------------|-------|-------|-------|--------|-------|
| Oil crops                               | 0.15  | 0.35  | 0.33  | 0.24   | 0.37  |
| Pulses                                  | 0.56  | 1.26  | 1.2   | 0.87   | 1.36  |
| Roots & tubers                          | 0.54  | 1.21  | 1.15  | 0.84   | 1.31  |
| Sugar crops                             | 0.61  | 1.38  | 1.32  | 0.96   | 1.5   |
| Vegetables                              | 0.2   | 0.46  | 0.44  | 0.32   | 0.5   |
| <b>Cyprus</b>                           |       |       |       |        |       |
| Cereals                                 | 0     | 0     | 0     | 0      | 0     |
| Fiber                                   | 0     | 0     | 0     | 0      | 0     |
| Fruit                                   | 0     | 0.01  | 0     | 0      | 0     |
| Livestock                               | 0.1   | 0.47  | 0.17  | 0.08   | 0.01  |
| Oil crops                               | 0     | 0     | 0     | 0      | 0     |
| Pulses                                  | 0     | 0     | 0     | 0      | 0     |
| Roots & tubers                          | 0     | 0     | 0     | 0      | 0     |
| Sugar crops                             | 0     | 0     | 0     | 0      | 0     |
| Vegetables                              | 0     | 0     | 0     | 0      | 0     |
| <b>Czech Republic</b>                   |       |       |       |        |       |
| Cereals                                 | 18.87 | 70.13 | 29.29 | 88.53  | 31.03 |
| Fiber                                   | 0     | 0     | 0     | 0      | 0     |
| Fruit                                   | 0.04  | 0.15  | 0.06  | 0.12   | 0.02  |
| Livestock                               | 0.27  | 1.73  | 1.25  | 4.08   | 1.31  |
| Oil crops                               | 10.57 | 40.44 | 17.83 | 56.35  | 20.09 |
| Pulses                                  | 0.33  | 1.16  | 0.43  | 1.12   | 0.36  |
| Roots & tubers                          | 0.23  | 1.16  | 0.73  | 2.18   | 0.62  |
| Sugar crops                             | 1.88  | 6.41  | 2.23  | 6.57   | 2.47  |
| Vegetables                              | 0.02  | 0.06  | 0.02  | 0.05   | 0.02  |
| <b>Democratic Republic of the Congo</b> |       |       |       |        |       |
| Cereals                                 | 10.55 | 18.1  | 1.78  | 4.46   | 0     |
| Fiber                                   | 0.48  | 0.89  | 0.09  | 0.26   | 0     |
| Fruit                                   | 1.77  | 2.78  | 0.24  | 0.83   | 0     |
| Livestock                               | 0.3   | 0.56  | 0.06  | 0.04   | 0     |
| Oil crops                               | 1.03  | 1.71  | 0.16  | 0.26   | 0     |
| Pulses                                  | 2.07  | 3.39  | 0.31  | 0.79   | 0     |
| Roots & tubers                          | 10.06 | 18.82 | 1.98  | 5.1    | 0     |
| Sugar crops                             | 0.22  | 0.4   | 0.04  | 0.13   | 0     |
| Vegetables                              | 0.06  | 0.11  | 0.01  | 0.04   | 0     |
| <b>Denmark</b>                          |       |       |       |        |       |
| Cereals                                 | 6.82  | 56.72 | 43.89 | 147.67 | 51.32 |
| Fiber                                   | 0     | 0     | 0     | 0      | 0     |
| Fruit                                   | 0     | 0.01  | 0.01  | 0.02   | 0.01  |
| Livestock                               | 0.42  | 3.42  | 2.6   | 8.56   | 2.93  |
| Oil crops                               | 1.6   | 13.29 | 10.28 | 34.4   | 11.89 |
| Pulses                                  | 0.03  | 0.26  | 0.2   | 0.68   | 0.24  |
| Roots & tubers                          | 0.2   | 1.64  | 1.27  | 4.29   | 1.49  |
| Sugar crops                             | 0.34  | 2.79  | 2.16  | 7.25   | 2.52  |
| Vegetables                              | 0     | 0.03  | 0.02  | 0.07   | 0.02  |

|                    |       |        |        |       |      |
|--------------------|-------|--------|--------|-------|------|
| <b>Djibouti</b>    |       |        |        |       |      |
| Cereals            | 0     | 0      | 0      | 0     | 0    |
| Fiber              | 0     | 0      | 0      | 0     | 0    |
| Fruit              | 0     | 0      | 0      | 0     | 0    |
| Livestock          | 0     | 0      | 0      | 0     | 0    |
| Oil crops          | 0     | 0      | 0      | 0     | 0    |
| Pulses             | 0     | 0      | 0      | 0     | 0    |
| Roots & tubers     | 0     | 0      | 0      | 0     | 0    |
| Sugar crops        | 0     | 0      | 0      | 0     | 0    |
| Vegetables         | 0     | 0      | 0      | 0     | 0    |
| <b>Dominica</b>    |       |        |        |       |      |
| Cereals            | 0     | 0      | 0      | 0     | 0    |
| Fiber              | 0     | 0      | 0      | 0     | 0    |
| Fruit              | 0     | 0.01   | 0.02   | 0.01  | 0.02 |
| Livestock          | 0     | 0      | 0.01   | 0     | 0    |
| Oil crops          | 0     | 0.01   | 0.04   | 0.03  | 0.03 |
| Pulses             | 0     | 0      | 0      | 0     | 0    |
| Roots & tubers     | 0     | 0.01   | 0.02   | 0.01  | 0.01 |
| Sugar crops        | 0     | 0      | 0      | 0     | 0    |
| Vegetables         | 0     | 0      | 0      | 0     | 0    |
| <b>Ecuador</b>     |       |        |        |       |      |
| Cereals            | 0.36  | 5.68   | 5.47   | 8.47  | 16   |
| Fiber              | 0     | 0.02   | 0.02   | 0.05  | 0.09 |
| Fruit              | 0.18  | 2.68   | 2.4    | 2.83  | 4.72 |
| Livestock          | 0.08  | 1.24   | 1.21   | 2.03  | 5.26 |
| Oil crops          | 0.01  | 0.3    | 0.45   | 1.58  | 5.13 |
| Pulses             | 0.01  | 0.19   | 0.18   | 0.26  | 0.45 |
| Roots & tubers     | 0.01  | 0.19   | 0.22   | 0.52  | 1.25 |
| Sugar crops        | 0.03  | 0.46   | 0.45   | 0.78  | 2    |
| Vegetables         | 0     | 0.04   | 0.03   | 0.04  | 0.06 |
| <b>Egypt</b>       |       |        |        |       |      |
| Cereals            | 61.78 | 285.79 | 106.01 | 51.42 | 9.12 |
| Fiber              | 3.83  | 17.71  | 6.57   | 3.19  | 0.56 |
| Fruit              | 2.29  | 10.6   | 3.93   | 1.91  | 0.34 |
| Livestock          | 2.75  | 12.7   | 4.71   | 2.29  | 0.41 |
| Oil crops          | 2.84  | 13.13  | 4.87   | 2.36  | 0.42 |
| Pulses             | 0.39  | 1.8    | 0.67   | 0.32  | 0.06 |
| Roots & tubers     | 2.12  | 9.8    | 3.63   | 1.76  | 0.31 |
| Sugar crops        | 4.16  | 19.23  | 7.13   | 3.46  | 0.61 |
| Vegetables         | 2.74  | 12.67  | 4.7    | 2.28  | 0.4  |
| <b>El Salvador</b> |       |        |        |       |      |
| Cereals            | 3.11  | 7.71   | 8.4    | 3.55  | 1.55 |
| Fiber              | 0.01  | 0.03   | 0.03   | 0.01  | 0    |
| Fruit              | 0.06  | 0.13   | 0.12   | 0.05  | 0.02 |
| Livestock          | 0.21  | 0.64   | 0.98   | 0.41  | 0.18 |
| Oil crops          | 0.32  | 0.7    | 0.55   | 0.23  | 0.1  |

|                          |        |        |       |       |       |
|--------------------------|--------|--------|-------|-------|-------|
| Pulses                   | 0.22   | 0.98   | 1.96  | 0.83  | 0.36  |
| Roots & tubers           | 0.01   | 0.03   | 0.02  | 0.01  | 0     |
| Sugar crops              | 0.49   | 0.98   | 0.57  | 0.24  | 0.1   |
| Vegetables               | 0.02   | 0.03   | 0.02  | 0.01  | 0     |
| <b>Equatorial Guinea</b> |        |        |       |       |       |
| Cereals                  | 0      | 0      | 0     | 0     | 0     |
| Fiber                    | 0      | 0      | 0     | 0     | 0     |
| Fruit                    | 0.08   | 0.1    | 0     | 0     | 0     |
| Livestock                | 0.01   | 0.01   | 0     | 0     | 0     |
| Oil crops                | 0.04   | 0.04   | 0     | 0     | 0     |
| Pulses                   | 0      | 0      | 0     | 0     | 0     |
| Roots & tubers           | 0.2    | 0.24   | 0.01  | 0     | 0     |
| Sugar crops              | 0      | 0      | 0     | 0     | 0     |
| Vegetables               | 0      | 0      | 0     | 0     | 0     |
| <b>Eritrea</b>           |        |        |       |       |       |
| Cereals                  | 3.96   | 8.12   | 0.91  | 0     | 0     |
| Fiber                    | 0      | 0      | 0     | 0     | 0     |
| Fruit                    | 0      | 0      | 0     | 0     | 0     |
| Livestock                | 0.22   | 0.38   | 0.04  | 0     | 0     |
| Oil crops                | 0.45   | 1.11   | 0.14  | 0     | 0     |
| Pulses                   | 0.08   | 0.19   | 0.02  | 0     | 0     |
| Roots & tubers           | 0.02   | 0.04   | 0     | 0     | 0     |
| Sugar crops              | 0      | 0      | 0     | 0     | 0     |
| Vegetables               | 0      | 0      | 0     | 0     | 0     |
| <b>Estonia</b>           |        |        |       |       |       |
| Cereals                  | 0.34   | 3.13   | 2.57  | 13.99 | 6.62  |
| Fiber                    | 0      | 0      | 0     | 0     | 0     |
| Fruit                    | 0      | 0      | 0     | 0     | 0     |
| Livestock                | 0.01   | 0.12   | 0.12  | 0.58  | 0.25  |
| Oil crops                | 0.19   | 1.74   | 1.44  | 8.35  | 4.05  |
| Pulses                   | 0      | 0.04   | 0.03  | 0.18  | 0.09  |
| Roots & tubers           | 0.01   | 0.12   | 0.1   | 0.57  | 0.27  |
| Sugar crops              | 0      | 0      | 0     | 0     | 0     |
| Vegetables               | 0      | 0      | 0     | 0.01  | 0     |
| <b>Ethiopia</b>          |        |        |       |       |       |
| Cereals                  | 127.95 | 227.43 | 22.88 | 19.9  | 0     |
| Fiber                    | 1.33   | 2.51   | 0.27  | 0.45  | 0     |
| Fruit                    | 0.13   | 0.25   | 0.03  | 0.04  | 0     |
| Livestock                | 3.52   | 5.74   | 0.53  | 0.26  | 0     |
| Oil crops                | 8.16   | 13.83  | 1.32  | 1.98  | 0     |
| Pulses                   | 7.77   | 11.23  | 0.87  | 0.92  | 0     |
| Roots & tubers           | 1.69   | 3.18   | 0.34  | 0.57  | 0     |
| Sugar crops              | 0.37   | 0.7    | 0.07  | 0.13  | 0     |
| Vegetables               | 0.13   | 0.25   | 0.03  | 0.04  | 0     |
| <b>Finland</b>           |        |        |       |       |       |
| Cereals                  | 4.51   | 35.38  | 27.51 | 70.13 | 15.71 |

|                |      |        |        |        |        |
|----------------|------|--------|--------|--------|--------|
| Fiber          | 0    | 0      | 0      | 0      | 0      |
| Fruit          | 0    | 0      | 0      | 0      | 0      |
| Livestock      | 0.21 | 1.42   | 1.02   | 2.26   | 0.39   |
| Oil crops      | 0.57 | 4.45   | 3.44   | 8.77   | 1.98   |
| Pulses         | 0.01 | 0.1    | 0.08   | 0.2    | 0.05   |
| Roots & tubers | 0.11 | 0.89   | 0.7    | 1.82   | 0.42   |
| Sugar crops    | 0.17 | 1.34   | 1.03   | 2.63   | 0.59   |
| Vegetables     | 0    | 0.03   | 0.02   | 0.06   | 0.01   |
| <b>France</b>  |      |        |        |        |        |
| Cereals        | 73   | 378.36 | 236.18 | 934    | 370.73 |
| Fiber          | 0    | 0      | 0      | 0      | 0      |
| Fruit          | 1.4  | 7.29   | 4.14   | 9.67   | 2.4    |
| Livestock      | 4.65 | 21.9   | 12.35  | 28.88  | 6.06   |
| Oil crops      | 24.1 | 120.31 | 74.61  | 371.41 | 168.33 |
| Pulses         | 2.63 | 11.77  | 6.29   | 20.14  | 6.96   |
| Roots & tubers | 0.39 | 5.19   | 5.16   | 20.91  | 7.65   |
| Sugar crops    | 0.95 | 16.16  | 17.31  | 107.91 | 51.21  |
| Vegetables     | 0.12 | 0.52   | 0.28   | 0.89   | 0.3    |
| <b>Gabon</b>   |      |        |        |        |        |
| Cereals        | 0.37 | 0.49   | 0.04   | 0      | 0      |
| Fiber          | 0    | 0      | 0      | 0      | 0      |
| Fruit          | 0.44 | 0.6    | 0.05   | 0      | 0      |
| Livestock      | 0.03 | 0.08   | 0.01   | 0      | 0      |
| Oil crops      | 0.14 | 0.18   | 0.01   | 0      | 0      |
| Pulses         | 0    | 0      | 0      | 0      | 0      |
| Roots & tubers | 0.56 | 0.74   | 0.06   | 0      | 0      |
| Sugar crops    | 0.04 | 0.06   | 0.01   | 0      | 0      |
| Vegetables     | 0    | 0      | 0      | 0      | 0      |
| <b>Gambia</b>  |      |        |        |        |        |
| Cereals        | 1.69 | 3.23   | 0.35   | 0      | 0      |
| Fiber          | 0.01 | 0.02   | 0      | 0      | 0      |
| Fruit          | 0    | 0      | 0      | 0      | 0      |
| Livestock      | 0.03 | 0.07   | 0.01   | 0      | 0      |
| Oil crops      | 0.13 | 0.22   | 0.02   | 0      | 0      |
| Pulses         | 0.01 | 0.02   | 0      | 0      | 0      |
| Roots & tubers | 0.01 | 0.01   | 0      | 0      | 0      |
| Sugar crops    | 0    | 0      | 0      | 0      | 0      |
| Vegetables     | 0    | 0      | 0      | 0      | 0      |
| <b>Georgia</b> |      |        |        |        |        |
| Cereals        | 1.49 | 7.81   | 2.89   | 1.49   | 0.26   |
| Fiber          | 0    | 0      | 0      | 0      | 0      |
| Fruit          | 0.07 | 0.46   | 0.19   | 0.1    | 0.02   |
| Livestock      | 0.2  | 0.94   | 0.33   | 0.17   | 0.03   |
| Oil crops      | 0.15 | 0.77   | 0.29   | 0.15   | 0.03   |
| Pulses         | 0.09 | 0.44   | 0.16   | 0.08   | 0.01   |
| Roots & tubers | 0.17 | 0.91   | 0.34   | 0.18   | 0.03   |



|                  |       |        |        |        |        |
|------------------|-------|--------|--------|--------|--------|
| Sugar crops      | 0     | 0      | 0      | 0      | 0      |
| Vegetables       | 0.03  | 0.17   | 0.06   | 0.03   | 0.01   |
| <b>Germany</b>   |       |        |        |        |        |
| Cereals          | 60.52 | 307.06 | 181.78 | 624.21 | 228.93 |
| Fiber            | 0     | 0      | 0      | 0      | 0      |
| Fruit            | 0.89  | 2.76   | 0.71   | 1.11   | 0.26   |
| Livestock        | 3.36  | 16.98  | 9.92   | 36.27  | 14.16  |
| Oil crops        | 28.81 | 153.08 | 96.22  | 388.26 | 157.59 |
| Pulses           | 0.69  | 3.13   | 1.66   | 5.57   | 2.06   |
| Roots & tubers   | 2.06  | 12.34  | 8.21   | 30.55  | 11.77  |
| Sugar crops      | 3.99  | 31.61  | 23.67  | 67.15  | 19.51  |
| Vegetables       | 0.05  | 0.22   | 0.11   | 0.33   | 0.12   |
| <b>Ghana</b>     |       |        |        |        |        |
| Cereals          | 18.73 | 26.26  | 1.96   | 0.01   | 0      |
| Fiber            | 0.37  | 0.66   | 0.07   | 0      | 0      |
| Fruit            | 4.9   | 6.74   | 0.5    | 0      | 0      |
| Livestock        | 0.61  | 0.9    | 0.07   | 0      | 0      |
| Oil crops        | 1.32  | 2.41   | 0.25   | 0      | 0      |
| Pulses           | 3.72  | 4.49   | 0.22   | 0      | 0      |
| Roots & tubers   | 16.95 | 23.45  | 1.76   | 0      | 0      |
| Sugar crops      | 0.03  | 0.04   | 0      | 0      | 0      |
| Vegetables       | 0.19  | 0.32   | 0.03   | 0      | 0      |
| <b>Greece</b>    |       |        |        |        |        |
| Cereals          | 14.7  | 58.12  | 25.02  | 41.54  | 4.36   |
| Fiber            | 5.82  | 23.22  | 10.35  | 18.14  | 2.08   |
| Fruit            | 0.49  | 1.93   | 0.82   | 1.29   | 0.12   |
| Livestock        | 0.88  | 3.72   | 1.63   | 2.36   | 0.16   |
| Oil crops        | 7.35  | 28.42  | 11.49  | 17.46  | 1.55   |
| Pulses           | 0.14  | 0.52   | 0.19   | 0.28   | 0.03   |
| Roots & tubers   | 0.49  | 2.01   | 0.93   | 1.61   | 0.18   |
| Sugar crops      | 1.19  | 4.56   | 1.87   | 3.04   | 0.32   |
| Vegetables       | 0.48  | 1.8    | 0.71   | 1.11   | 0.11   |
| <b>Grenada</b>   |       |        |        |        |        |
| Cereals          | 0     | 0      | 0      | 0      | 0      |
| Fiber            | 0     | 0      | 0      | 0      | 0      |
| Fruit            | 0     | 0      | 0      | 0      | 0      |
| Livestock        | 0     | 0      | 0      | 0      | 0      |
| Oil crops        | 0     | 0      | 0      | 0      | 0      |
| Pulses           | 0     | 0      | 0      | 0      | 0      |
| Roots & tubers   | 0     | 0      | 0      | 0      | 0      |
| Sugar crops      | 0     | 0      | 0      | 0      | 0      |
| Vegetables       | 0     | 0      | 0      | 0      | 0      |
| <b>Guatemala</b> |       |        |        |        |        |
| Cereals          | 1.96  | 6.13   | 10.42  | 7.15   | 9.06   |
| Fiber            | 0.01  | 0.04   | 0.08   | 0.05   | 0.05   |
| Fruit            | 0.21  | 0.77   | 1.45   | 0.84   | 0.86   |

|                      |       |       |      |      |      |
|----------------------|-------|-------|------|------|------|
| Livestock            | 0.49  | 1.37  | 1.91 | 1.01 | 0.89 |
| Oil crops            | 0.58  | 2.13  | 4.03 | 2.32 | 2.35 |
| Pulses               | 0.46  | 1.43  | 2.35 | 1.51 | 1.77 |
| Roots & tubers       | 0.13  | 0.49  | 0.92 | 0.53 | 0.54 |
| Sugar crops          | 0.47  | 1.73  | 3.29 | 1.9  | 1.93 |
| Vegetables           | 0.05  | 0.18  | 0.34 | 0.2  | 0.21 |
| <b>Guinea</b>        |       |       |      |      |      |
| Cereals              | 10.11 | 22.44 | 2.7  | 0.01 | 0    |
| Fiber                | 0.72  | 1.46  | 0.17 | 0    | 0    |
| Fruit                | 0.67  | 1.42  | 0.17 | 0    | 0    |
| Livestock            | 0.47  | 0.75  | 0.07 | 0    | 0    |
| Oil crops            | 0.19  | 0.34  | 0.04 | 0    | 0    |
| Pulses               | 0.13  | 0.43  | 0.06 | 0    | 0    |
| Roots & tubers       | 1.11  | 2.13  | 0.23 | 0    | 0    |
| Sugar crops          | 0.04  | 0.09  | 0.01 | 0    | 0    |
| Vegetables           | 0     | 0     | 0    | 0    | 0    |
| <b>Guinea-Bissau</b> |       |       |      |      |      |
| Cereals              | 1.63  | 1.97  | 0.12 | 0    | 0    |
| Fiber                | 0.13  | 0.15  | 0.01 | 0    | 0    |
| Fruit                | 0.08  | 0.1   | 0.01 | 0    | 0    |
| Livestock            | 0.1   | 0.12  | 0.01 | 0    | 0    |
| Oil crops            | 0.25  | 0.31  | 0.02 | 0    | 0    |
| Pulses               | 0.01  | 0.01  | 0    | 0    | 0    |
| Roots & tubers       | 0.04  | 0.05  | 0    | 0    | 0    |
| Sugar crops          | 0     | 0     | 0    | 0    | 0    |
| Vegetables           | 0     | 0     | 0    | 0    | 0    |
| <b>Guyana</b>        |       |       |      |      |      |
| Cereals              | 0     | 0.04  | 0.08 | 0.5  | 3.1  |
| Fiber                | 0     | 0     | 0    | 0    | 0    |
| Fruit                | 0     | 0     | 0    | 0.01 | 0.03 |
| Livestock            | 0     | 0.01  | 0.01 | 0.04 | 0.16 |
| Oil crops            | 0     | 0.04  | 0.06 | 0.22 | 0.7  |
| Pulses               | 0     | 0     | 0    | 0    | 0.02 |
| Roots & tubers       | 0     | 0     | 0    | 0.01 | 0.05 |
| Sugar crops          | 0     | 0.04  | 0.06 | 0.27 | 1.15 |
| Vegetables           | 0     | 0     | 0    | 0    | 0    |
| <b>Haiti</b>         |       |       |      |      |      |
| Cereals              | 1.62  | 3.66  | 3.24 | 1.37 | 0.6  |
| Fiber                | 0.01  | 0.03  | 0.02 | 0.01 | 0    |
| Fruit                | 0.24  | 0.54  | 0.48 | 0.2  | 0.09 |
| Livestock            | 0.18  | 0.41  | 0.34 | 0.14 | 0.06 |
| Oil crops            | 0.15  | 0.34  | 0.31 | 0.13 | 0.06 |
| Pulses               | 0.44  | 1     | 0.89 | 0.38 | 0.16 |
| Roots & tubers       | 0.46  | 1.04  | 0.92 | 0.39 | 0.17 |
| Sugar crops          | 0.08  | 0.19  | 0.17 | 0.07 | 0.03 |
| Vegetables           | 0     | 0.01  | 0.01 | 0    | 0    |

**Honduras**

|                |      |      |      |      |      |
|----------------|------|------|------|------|------|
| Cereals        | 1.64 | 3.32 | 2.19 | 2.69 | 6.91 |
| Fiber          | 0.01 | 0.02 | 0.01 | 0.02 | 0.04 |
| Fruit          | 0.18 | 0.38 | 0.28 | 0.31 | 0.74 |
| Livestock      | 0.27 | 0.56 | 0.41 | 0.49 | 1.23 |
| Oil crops      | 0.06 | 0.12 | 0.09 | 0.1  | 0.24 |
| Pulses         | 0.22 | 0.49 | 0.44 | 0.76 | 2.21 |
| Roots & tubers | 0.02 | 0.04 | 0.03 | 0.03 | 0.08 |
| Sugar crops    | 0.25 | 0.52 | 0.4  | 0.48 | 1.22 |
| Vegetables     | 0.04 | 0.09 | 0.06 | 0.07 | 0.16 |

**Hungary**

|                |       |        |       |        |       |
|----------------|-------|--------|-------|--------|-------|
| Cereals        | 31.45 | 124.11 | 53.42 | 141.62 | 45.95 |
| Fiber          | 0     | 0      | 0     | 0      | 0     |
| Fruit          | 0.13  | 0.59   | 0.3   | 0.88   | 0.3   |
| Livestock      | 0.4   | 2.56   | 1.7   | 4.03   | 0.93  |
| Oil crops      | 6.48  | 27.18  | 12.91 | 39.94  | 14.4  |
| Pulses         | 0.14  | 0.68   | 0.37  | 1.01   | 0.31  |
| Roots & tubers | 0.33  | 1.2    | 0.46  | 1.13   | 0.36  |
| Sugar crops    | 1.63  | 5.88   | 2.2   | 4.78   | 1.25  |
| Vegetables     | 0.08  | 0.26   | 0.08  | 0.19   | 0.06  |

**Iceland**

|                |   |   |   |   |   |
|----------------|---|---|---|---|---|
| Cereals        | 0 | 0 | 0 | 0 | 0 |
| Fiber          | 0 | 0 | 0 | 0 | 0 |
| Fruit          | 0 | 0 | 0 | 0 | 0 |
| Livestock      | 0 | 0 | 0 | 0 | 0 |
| Oil crops      | 0 | 0 | 0 | 0 | 0 |
| Pulses         | 0 | 0 | 0 | 0 | 0 |
| Roots & tubers | 0 | 0 | 0 | 0 | 0 |
| Sugar crops    | 0 | 0 | 0 | 0 | 0 |
| Vegetables     | 0 | 0 | 0 | 0 | 0 |

**India**

|                |         |         |        |       |   |
|----------------|---------|---------|--------|-------|---|
| Cereals        | 1549.83 | 2771.56 | 311.92 | 58.95 | 0 |
| Fiber          | 144.37  | 426.42  | 58.91  | 11.13 | 0 |
| Fruit          | 13.38   | 29.74   | 3.69   | 0.71  | 0 |
| Livestock      | 47.53   | 95.99   | 11.31  | 2.2   | 0 |
| Oil crops      | 832.99  | 1840.89 | 227.85 | 43.71 | 0 |
| Pulses         | 60.72   | 149.42  | 19.27  | 3.7   | 0 |
| Roots & tubers | 60.13   | 115.31  | 13.46  | 2.55  | 0 |
| Sugar crops    | 35.73   | 94.81   | 12.7   | 2.39  | 0 |
| Vegetables     | 16.07   | 25.79   | 2.65   | 0.52  | 0 |

**Indonesia**

|           |        |        |       |       |   |
|-----------|--------|--------|-------|-------|---|
| Cereals   | 279.41 | 387.16 | 13.83 | 93    | 0 |
| Fiber     | 0.08   | 0.14   | 0.01  | 0.07  | 0 |
| Fruit     | 3.28   | 5.77   | 0.31  | 2.98  | 0 |
| Livestock | 15.58  | 21.82  | 0.78  | 1.09  | 0 |
| Oil crops | 110.12 | 166.12 | 7.07  | 60.79 | 0 |

|                                   |        |        |        |        |       |
|-----------------------------------|--------|--------|--------|--------|-------|
| Pulses                            | 4.89   | 8.6    | 0.46   | 4.45   | 0     |
| Roots & tubers                    | 21.72  | 31.07  | 1.14   | 4.99   | 0     |
| Sugar crops                       | 3.71   | 6.52   | 0.35   | 3.38   | 0     |
| Vegetables                        | 0.81   | 1.42   | 0.08   | 0.73   | 0     |
| <b>Iran (Islamic Republic of)</b> |        |        |        |        |       |
| Cereals                           | 176.93 | 353.83 | 41.2   | 140.78 | 0     |
| Fiber                             | 5.52   | 9.1    | 0.95   | 1.71   | 0     |
| Fruit                             | 5.28   | 11.88  | 1.46   | 3.89   | 0     |
| Livestock                         | 6.11   | 19.26  | 2.67   | 9.17   | 0     |
| Oil crops                         | 8.42   | 62.54  | 10.28  | 8.35   | 0     |
| Pulses                            | 2.97   | 6.68   | 0.83   | 2.41   | 0     |
| Roots & tubers                    | 5.44   | 10.94  | 1.27   | 7.84   | 0     |
| Sugar crops                       | 4.56   | 19.61  | 2.95   | 10.46  | 0     |
| Vegetables                        | 3.68   | 7.98   | 0.96   | 3.59   | 0     |
| <b>Iraq</b>                       |        |        |        |        |       |
| Cereals                           | 21.07  | 66.55  | 17.24  | 9.7    | 4.28  |
| Fiber                             | 0.18   | 0.83   | 0.31   | 0.15   | 0.03  |
| Fruit                             | 0.54   | 2.3    | 0.8    | 0.43   | 0.15  |
| Livestock                         | 0.3    | 1.25   | 0.4    | 0.38   | 0.44  |
| Oil crops                         | 0.09   | 0.37   | 0.13   | 0.06   | 0.01  |
| Pulses                            | 0.06   | 0.2    | 0.06   | 0.03   | 0.01  |
| Roots & tubers                    | 0.41   | 2.15   | 0.78   | 0.55   | 0.4   |
| Sugar crops                       | 0.01   | 0.04   | 0.02   | 0.01   | 0     |
| Vegetables                        | 0.31   | 1.47   | 0.55   | 0.27   | 0.05  |
| <b>Ireland</b>                    |        |        |        |        |       |
| Cereals                           | 2.36   | 15.36  | 10.91  | 33.91  | 10.65 |
| Fiber                             | 0      | 0      | 0      | 0      | 0     |
| Fruit                             | 0      | 0.01   | 0.01   | 0.02   | 0.01  |
| Livestock                         | 1.01   | 4.48   | 2.28   | 5.53   | 1.43  |
| Oil crops                         | 0.11   | 0.71   | 0.49   | 1.54   | 0.5   |
| Pulses                            | 0.03   | 0.2    | 0.14   | 0.44   | 0.14  |
| Roots & tubers                    | 0.08   | 0.49   | 0.34   | 1.07   | 0.34  |
| Sugar crops                       | 0.16   | 1.56   | 1.33   | 4.24   | 1.31  |
| Vegetables                        | 0      | 0.01   | 0.01   | 0.02   | 0.01  |
| <b>Israel</b>                     |        |        |        |        |       |
| Cereals                           | 1.79   | 10.14  | 3.94   | 2.01   | 0.35  |
| Fiber                             | 0.57   | 3.01   | 1.14   | 0.58   | 0.1   |
| Fruit                             | 0.29   | 1.29   | 0.45   | 0.22   | 0.04  |
| Livestock                         | 2.16   | 7.97   | 2.5    | 1.21   | 0.21  |
| Oil crops                         | 0.34   | 1.66   | 0.62   | 0.31   | 0.05  |
| Pulses                            | 0      | 0.02   | 0.01   | 0      | 0     |
| Roots & tubers                    | 0.86   | 3.97   | 1.44   | 0.71   | 0.12  |
| Sugar crops                       | 0      | 0      | 0      | 0      | 0     |
| Vegetables                        | 0.31   | 1.39   | 0.5    | 0.25   | 0.04  |
| <b>Italy</b>                      |        |        |        |        |       |
| Cereals                           | 21.42  | 142.5  | 100.76 | 270.96 | 71.1  |

|                    |       |       |       |       |       |
|--------------------|-------|-------|-------|-------|-------|
| Fiber              | 0     | 0     | 0     | 0     | 0     |
| Fruit              | 1.03  | 6.31  | 4.23  | 14.94 | 5.54  |
| Livestock          | 2.26  | 14.87 | 10.15 | 20.09 | 2.56  |
| Oil crops          | 10.09 | 46.48 | 24.82 | 74.59 | 24.94 |
| Pulses             | 0.13  | 0.72  | 0.45  | 1.14  | 0.3   |
| Roots & tubers     | 0.7   | 2.99  | 1.49  | 4.06  | 1.2   |
| Sugar crops        | 1.62  | 12.09 | 9.02  | 21.4  | 4.32  |
| Vegetables         | 0.82  | 4.46  | 2.76  | 7.2   | 1.9   |
| <b>Ivory Coast</b> |       |       |       |       |       |
| Cereals            | 0     | 0     | 0     | 0     | 0     |
| Fiber              | 0     | 0     | 0     | 0     | 0     |
| Fruit              | 0     | 0     | 0     | 0     | 0     |
| Livestock          | 0.16  | 0.92  | 0.15  | 0.05  | 0     |
| Oil crops          | 0     | 0     | 0     | 0     | 0     |
| Pulses             | 0     | 0     | 0     | 0     | 0     |
| Roots & tubers     | 0     | 0     | 0     | 0     | 0     |
| Sugar crops        | 0     | 0     | 0     | 0     | 0     |
| Vegetables         | 0     | 0     | 0     | 0     | 0     |
| <b>Jamaica</b>     |       |       |       |       |       |
| Cereals            | 0.02  | 0.03  | 0     | 0     | 0     |
| Fiber              | 0     | 0     | 0     | 0     | 0     |
| Fruit              | 0.11  | 0.19  | 0.02  | 0.01  | 0     |
| Livestock          | 0.36  | 0.6   | 0.06  | 0.02  | 0.01  |
| Oil crops          | 1.28  | 2.16  | 0.18  | 0.08  | 0.03  |
| Pulses             | 0.02  | 0.03  | 0     | 0     | 0     |
| Roots & tubers     | 0.25  | 0.42  | 0.04  | 0.02  | 0.01  |
| Sugar crops        | 0.29  | 0.49  | 0.04  | 0.02  | 0.01  |
| Vegetables         | 0.02  | 0.03  | 0     | 0     | 0     |
| <b>Japan</b>       |       |       |       |       |       |
| Cereals            | 38.3  | 52.23 | 21.05 | 13.71 | 0     |
| Fiber              | 0     | 0     | 0     | 0     | 0     |
| Fruit              | 0.49  | 0.7   | 0.29  | 0.22  | 0     |
| Livestock          | 32.19 | 22.43 | 6.08  | 5.53  | 0     |
| Oil crops          | 11.07 | 14.37 | 5.72  | 4.62  | 0     |
| Pulses             | 1.54  | 2.19  | 0.9   | 0.69  | 0     |
| Roots & tubers     | 7.66  | 8.37  | 3.09  | 2.29  | 0     |
| Sugar crops        | 7.83  | 10.69 | 4.32  | 3.33  | 0     |
| Vegetables         | 1.17  | 1.67  | 0.68  | 0.53  | 0     |
| <b>Jordan</b>      |       |       |       |       |       |
| Cereals            | 0.28  | 1.31  | 0.49  | 0.24  | 0.04  |
| Fiber              | 0     | 0     | 0     | 0     | 0     |
| Fruit              | 0.03  | 0.16  | 0.06  | 0.03  | 0.01  |
| Livestock          | 0.22  | 1     | 0.37  | 0.18  | 0.03  |
| Oil crops          | 0.41  | 1.89  | 0.7   | 0.34  | 0.06  |
| Pulses             | 0     | 0     | 0     | 0     | 0     |
| Roots & tubers     | 0.1   | 0.47  | 0.17  | 0.08  | 0.01  |

|                                         |       |        |       |        |        |
|-----------------------------------------|-------|--------|-------|--------|--------|
| Sugar crops                             | 0     | 0      | 0     | 0      | 0      |
| Vegetables                              | 0.17  | 0.76   | 0.28  | 0.14   | 0.02   |
| <b>Kazakhstan</b>                       |       |        |       |        |        |
| Cereals                                 | 8.18  | 142.19 | 67.03 | 133.17 | 229.07 |
| Fiber                                   | 1.16  | 8.83   | 3.75  | 4.41   | 6.01   |
| Fruit                                   | 0.03  | 0.16   | 0.06  | 0.04   | 0.01   |
| Livestock                               | 0.76  | 5.55   | 2.34  | 2.36   | 2.87   |
| Oil crops                               | 0.89  | 10.6   | 4.82  | 5.98   | 8.26   |
| Pulses                                  | 0.05  | 0.59   | 0.27  | 0.41   | 0.64   |
| Roots & tubers                          | 0.55  | 5.3    | 2.34  | 2.63   | 3.41   |
| Sugar crops                             | 0.06  | 0.93   | 0.44  | 0.32   | 0.22   |
| Vegetables                              | 0.14  | 0.89   | 0.37  | 0.27   | 0.22   |
| <b>Kenya</b>                            |       |        |       |        |        |
| Cereals                                 | 24.56 | 50.98  | 5.85  | 21     | 0      |
| Fiber                                   | 0.28  | 0.59   | 0.07  | 0.28   | 0      |
| Fruit                                   | 0.64  | 1.4    | 0.17  | 0.61   | 0      |
| Livestock                               | 2.54  | 5.67   | 0.68  | 1.85   | 0      |
| Oil crops                               | 0.75  | 1.47   | 0.16  | 0.6    | 0      |
| Pulses                                  | 6.69  | 13.32  | 1.48  | 4.41   | 0      |
| Roots & tubers                          | 4.21  | 9.19   | 1.09  | 3.97   | 0      |
| Sugar crops                             | 0.57  | 1.23   | 0.15  | 0.55   | 0      |
| Vegetables                              | 0.34  | 0.74   | 0.09  | 0.33   | 0      |
| <b>Kuwait</b>                           |       |        |       |        |        |
| Cereals                                 | 0     | 0.06   | 0.03  | 0.02   | 0      |
| Fiber                                   | 0     | 0      | 0     | 0      | 0      |
| Fruit                                   | 0     | 0.07   | 0.04  | 0.02   | 0      |
| Livestock                               | 0     | 0.86   | 0.44  | 0.24   | 0.04   |
| Oil crops                               | 0     | 0      | 0     | 0      | 0      |
| Pulses                                  | 0     | 0      | 0     | 0      | 0      |
| Roots & tubers                          | 0     | 0.07   | 0.03  | 0.02   | 0      |
| Sugar crops                             | 0     | 0      | 0     | 0      | 0      |
| Vegetables                              | 0     | 0.09   | 0.05  | 0.03   | 0      |
| <b>Kyrgyzstan</b>                       |       |        |       |        |        |
| Cereals                                 | 3.51  | 17.81  | 6.39  | 8.65   | 12.82  |
| Fiber                                   | 0.38  | 2.26   | 0.86  | 1.04   | 1.41   |
| Fruit                                   | 0.01  | 0.07   | 0.02  | 0.03   | 0.05   |
| Livestock                               | 0.39  | 1.56   | 0.48  | 0.44   | 0.48   |
| Oil crops                               | 0.17  | 0.84   | 0.3   | 0.3    | 0.36   |
| Pulses                                  | 0.12  | 1.83   | 0.85  | 0.46   | 0.08   |
| Roots & tubers                          | 0.52  | 2.64   | 0.95  | 1.3    | 1.94   |
| Sugar crops                             | 0.09  | 0.48   | 0.18  | 0.25   | 0.38   |
| Vegetables                              | 0.05  | 0.24   | 0.09  | 0.11   | 0.16   |
| <b>Lao People's Democratic Republic</b> |       |        |       |        |        |
| Cereals                                 | 12.15 | 20.98  | 1.04  | 0.38   | 0      |
| Fiber                                   | 0.15  | 0.22   | 0.01  | 0      | 0      |

|                |      |      |      |       |      |
|----------------|------|------|------|-------|------|
| Fruit          | 0.12 | 0.24 | 0.01 | 0.01  | 0    |
| Livestock      | 0.42 | 0.73 | 0.04 | 0.01  | 0    |
| Oil crops      | 1.13 | 1.61 | 0.05 | 0.02  | 0    |
| Pulses         | 0.11 | 0.2  | 0.01 | 0     | 0    |
| Roots & tubers | 0.38 | 0.66 | 0.04 | 0.01  | 0    |
| Sugar crops    | 0.03 | 0.08 | 0.01 | 0     | 0    |
| Vegetables     | 0    | 0    | 0    | 0     | 0    |
| <b>Latvia</b>  |      |      |      |       |      |
| Cereals        | 0.84 | 6.94 | 5.34 | 22.77 | 9.6  |
| Fiber          | 0    | 0    | 0    | 0     | 0    |
| Fruit          | 0    | 0.01 | 0    | 0.02  | 0.01 |
| Livestock      | 0.04 | 0.32 | 0.24 | 0.78  | 0.28 |
| Oil crops      | 0.47 | 3.87 | 2.97 | 12.02 | 4.9  |
| Pulses         | 0    | 0.02 | 0.02 | 0.06  | 0.02 |
| Roots & tubers | 0.06 | 0.54 | 0.41 | 1.82  | 0.78 |
| Sugar crops    | 0.03 | 0.28 | 0.22 | 1.05  | 0.47 |
| Vegetables     | 0    | 0.01 | 0.01 | 0.02  | 0.01 |
| <b>Lebanon</b> |      |      |      |       |      |
| Cereals        | 0.53 | 2.46 | 0.88 | 0.96  | 1.27 |
| Fiber          | 0    | 0    | 0    | 0     | 0    |
| Fruit          | 0.08 | 0.35 | 0.12 | 0.13  | 0.17 |
| Livestock      | 0.11 | 0.67 | 0.26 | 0.56  | 1.01 |
| Oil crops      | 0.33 | 1.6  | 0.58 | 0.32  | 0.11 |
| Pulses         | 0.01 | 0.05 | 0.02 | 0.02  | 0.03 |
| Roots & tubers | 0.09 | 0.78 | 0.34 | 0.59  | 0.97 |
| Sugar crops    | 0.02 | 0.12 | 0.04 | 0.05  | 0.08 |
| Vegetables     | 0.06 | 0.33 | 0.12 | 0.13  | 0.16 |
| <b>Lesotho</b> |      |      |      |       |      |
| Cereals        | 0.81 | 1.82 | 0.22 | 0     | 0    |
| Fiber          | 0    | 0    | 0    | 0     | 0    |
| Fruit          | 0    | 0    | 0    | 0     | 0    |
| Livestock      | 0.12 | 0.24 | 0.03 | 0     | 0    |
| Oil crops      | 0    | 0    | 0    | 0     | 0    |
| Pulses         | 0.08 | 0.15 | 0.02 | 0     | 0    |
| Roots & tubers | 0.13 | 0.38 | 0.05 | 0     | 0    |
| Sugar crops    | 0    | 0    | 0    | 0     | 0    |
| Vegetables     | 0    | 0    | 0    | 0     | 0    |
| <b>Liberia</b> |      |      |      |       |      |
| Cereals        | 0.42 | 0.94 | 0.11 | 0     | 0    |
| Fiber          | 0    | 0    | 0    | 0     | 0    |
| Fruit          | 0.09 | 0.26 | 0.04 | 0     | 0    |
| Livestock      | 0.03 | 0.15 | 0.02 | 0     | 0    |
| Oil crops      | 0.16 | 0.42 | 0.05 | 0     | 0    |
| Pulses         | 0.01 | 0.02 | 0    | 0     | 0    |
| Roots & tubers | 0.37 | 0.88 | 0.11 | 0     | 0    |
| Sugar crops    | 0.03 | 0.09 | 0.01 | 0     | 0    |

|                   |       |       |       |       |       |
|-------------------|-------|-------|-------|-------|-------|
| Vegetables        | 0     | 0     | 0     | 0     | 0     |
| <b>Libya</b>      |       |       |       |       |       |
| Cereals           | 0.67  | 2.9   | 0.94  | 1.31  | 1.97  |
| Fiber             | 0     | 0     | 0     | 0     | 0     |
| Fruit             | 0.12  | 0.52  | 0.17  | 0.24  | 0.36  |
| Livestock         | 0.18  | 1.29  | 0.54  | 0.39  | 0.3   |
| Oil crops         | 0.39  | 1.74  | 0.57  | 0.81  | 1.23  |
| Pulses            | 0.03  | 0.11  | 0.04  | 0.05  | 0.08  |
| Roots & tubers    | 0.14  | 0.6   | 0.2   | 0.28  | 0.42  |
| Sugar crops       | 0     | 0     | 0     | 0     | 0     |
| Vegetables        | 0.07  | 0.3   | 0.1   | 0.14  | 0.21  |
| <b>Lithuania</b>  |       |       |       |       |       |
| Cereals           | 3.6   | 18.43 | 11.07 | 36.67 | 12.89 |
| Fiber             | 0     | 0     | 0     | 0     | 0     |
| Fruit             | 0.01  | 0.03  | 0.01  | 0.03  | 0.01  |
| Livestock         | 0.12  | 0.67  | 0.41  | 1.74  | 0.76  |
| Oil crops         | 1.34  | 7.49  | 4.75  | 16.26 | 5.89  |
| Pulses            | 0.1   | 0.41  | 0.18  | 0.5   | 0.16  |
| Roots & tubers    | 0.2   | 0.93  | 0.5   | 1.58  | 0.54  |
| Sugar crops       | 0.08  | 0.77  | 0.67  | 2.4   | 0.83  |
| Vegetables        | 0     | 0.01  | 0     | 0.01  | 0     |
| <b>Luxembourg</b> |       |       |       |       |       |
| Cereals           | 0     | 0.78  | 1     | 2.66  | 0.42  |
| Fiber             | 0     | 0     | 0     | 0     | 0     |
| Fruit             | 0     | 0.01  | 0.01  | 0.04  | 0.01  |
| Livestock         | 0     | 0.06  | 0.07  | 0.19  | 0.03  |
| Oil crops         | 0     | 0.41  | 0.53  | 1.41  | 0.22  |
| Pulses            | 0     | 0.01  | 0.01  | 0.03  | 0     |
| Roots & tubers    | 0     | 0.02  | 0.02  | 0.06  | 0.01  |
| Sugar crops       | 0     | 0     | 0     | 0     | 0     |
| Vegetables        | 0     | 0     | 0     | 0     | 0     |
| <b>Madagascar</b> |       |       |       |       |       |
| Cereals           | 17.15 | 20.76 | 1.21  | 0     | 0     |
| Fiber             | 0.31  | 0.38  | 0.02  | 0     | 0     |
| Fruit             | 0.31  | 0.38  | 0.02  | 0     | 0     |
| Livestock         | 1.48  | 1.8   | 0.1   | 0     | 0     |
| Oil crops         | 0.47  | 0.57  | 0.03  | 0     | 0     |
| Pulses            | 2.42  | 2.92  | 0.16  | 0     | 0     |
| Roots & tubers    | 5.23  | 6.33  | 0.36  | 0     | 0     |
| Sugar crops       | 0.41  | 0.8   | 0.09  | 0     | 0     |
| Vegetables        | 0.04  | 0.05  | 0     | 0     | 0     |
| <b>Malawi</b>     |       |       |       |       |       |
| Cereals           | 23.85 | 35.27 | 3.09  | 3.35  | 0     |
| Fiber             | 1.13  | 1.73  | 0.15  | 0.08  | 0     |
| Fruit             | 0.65  | 1.06  | 0.1   | 0.06  | 0     |
| Livestock         | 0.48  | 0.6   | 0.03  | 0.07  | 0     |



|                   |       |       |      |      |   |
|-------------------|-------|-------|------|------|---|
| Oil crops         | 3.89  | 4.7   | 0.24 | 0    | 0 |
| Pulses            | 2.9   | 4     | 0.32 | 0.14 | 0 |
| Roots & tubers    | 7.05  | 10.61 | 0.94 | 0.63 | 0 |
| Sugar crops       | 0.43  | 0.69  | 0.07 | 0.04 | 0 |
| Vegetables        | 0.07  | 0.11  | 0.01 | 0.01 | 0 |
| <b>Malaysia</b>   |       |       |      |      |   |
| Cereals           | 1.37  | 8.77  | 0.98 | 8.87 | 0 |
| Fiber             | 0     | 0     | 0    | 0    | 0 |
| Fruit             | 0.25  | 0.56  | 0.04 | 0.26 | 0 |
| Livestock         | 2.7   | 9.16  | 0.79 | 2.72 | 0 |
| Oil crops         | 1.56  | 3.45  | 0.24 | 1.55 | 0 |
| Pulses            | 0     | 0     | 0    | 0    | 0 |
| Roots & tubers    | 0.05  | 0.14  | 0.01 | 0.07 | 0 |
| Sugar crops       | 0.06  | 0.12  | 0.01 | 0.06 | 0 |
| Vegetables        | 0.03  | 0.06  | 0    | 0.02 | 0 |
| <b>Mali</b>       |       |       |      |      |   |
| Cereals           | 28.28 | 52.96 | 5.68 | 0.02 | 0 |
| Fiber             | 7.19  | 13.26 | 1.4  | 0.01 | 0 |
| Fruit             | 0.07  | 0.12  | 0.01 | 0    | 0 |
| Livestock         | 1.42  | 2.81  | 0.32 | 0    | 0 |
| Oil crops         | 0.35  | 0.63  | 0.07 | 0    | 0 |
| Pulses            | 0     | 0     | 0    | 0    | 0 |
| Roots & tubers    | 0.55  | 1.27  | 0.16 | 0    | 0 |
| Sugar crops       | 0.05  | 0.1   | 0.01 | 0    | 0 |
| Vegetables        | 0.09  | 0.21  | 0.03 | 0    | 0 |
| <b>Mauritania</b> |       |       |      |      |   |
| Cereals           | 1.48  | 2.18  | 0.17 | 0    | 0 |
| Fiber             | 0     | 0     | 0    | 0    | 0 |
| Fruit             | 0.06  | 0.1   | 0.01 | 0    | 0 |
| Livestock         | 0.6   | 0.91  | 0.08 | 0    | 0 |
| Oil crops         | 0     | 0     | 0    | 0    | 0 |
| Pulses            | 0.23  | 0.36  | 0.03 | 0    | 0 |
| Roots & tubers    | 0.01  | 0.02  | 0    | 0    | 0 |
| Sugar crops       | 0     | 0     | 0    | 0    | 0 |
| Vegetables        | 0     | 0     | 0    | 0    | 0 |
| <b>Mauritius</b>  |       |       |      |      |   |
| Cereals           | 0     | 0     | 0    | 0    | 0 |
| Fiber             | 0     | 0     | 0    | 0    | 0 |
| Fruit             | 0     | 0     | 0    | 0    | 0 |
| Livestock         | 0     | 0     | 0    | 0    | 0 |
| Oil crops         | 0     | 0     | 0    | 0    | 0 |
| Pulses            | 0     | 0     | 0    | 0    | 0 |
| Roots & tubers    | 0     | 0     | 0    | 0    | 0 |
| Sugar crops       | 0     | 0     | 0    | 0    | 0 |
| Vegetables        | 0     | 0     | 0    | 0    | 0 |
| <b>Mexico</b>     |       |       |      |      |   |

|                   |        |        |        |        |        |
|-------------------|--------|--------|--------|--------|--------|
| Cereals           | 120.94 | 257.82 | 204.97 | 138.49 | 196.76 |
| Fiber             | 0.01   | 0.38   | 1.45   | 4.7    | 15.56  |
| Fruit             | 1.03   | 2.4    | 2.41   | 1.52   | 2.03   |
| Livestock         | 8.78   | 21.97  | 25.47  | 14.54  | 15.65  |
| Oil crops         | 7.34   | 14.25  | 7.31   | 4.12   | 4.89   |
| Pulses            | 12.69  | 23.74  | 9.95   | 6.36   | 8.84   |
| Roots & tubers    | 0.94   | 2.28   | 2.56   | 1.73   | 2.38   |
| Sugar crops       | 2.89   | 7      | 7.51   | 4.1    | 4.24   |
| Vegetables        | 0.72   | 1.76   | 2.11   | 1.81   | 3.28   |
| <b>Mongolia</b>   |        |        |        |        |        |
| Cereals           | 0.61   | 0.85   | 0.34   | 2.1    | 0      |
| Fiber             | 0      | 0      | 0      | 0      | 0      |
| Fruit             | 0      | 0      | 0      | 0      | 0      |
| Livestock         | 0.85   | 0.84   | 0.28   | 1      | 0      |
| Oil crops         | 0.03   | 0.78   | 0.4    | 0.24   | 0      |
| Pulses            | 0      | 0      | 0      | 0.01   | 0      |
| Roots & tubers    | 0.09   | 0.13   | 0.05   | 0.32   | 0      |
| Sugar crops       | 0      | 0      | 0      | 0      | 0      |
| Vegetables        | 0      | 0      | 0      | 0      | 0      |
| <b>Montenegro</b> |        |        |        |        |        |
| Cereals           | 0.06   | 0.19   | 0.06   | 0.06   | 0      |
| Fiber             | 0      | 0      | 0      | 0      | 0      |
| Fruit             | 0.02   | 0.07   | 0.02   | 0.02   | 0      |
| Livestock         | 0.99   | 3.49   | 1.14   | 1.34   | 0.06   |
| Oil crops         | 0.01   | 0.02   | 0.01   | 0      | 0      |
| Pulses            | 0.02   | 0.06   | 0.02   | 0.02   | 0      |
| Roots & tubers    | 0.11   | 0.36   | 0.11   | 0.12   | 0.01   |
| Sugar crops       | 0      | 0      | 0      | 0      | 0      |
| Vegetables        | 0.01   | 0.03   | 0.01   | 0.01   | 0      |
| <b>Morocco</b>    |        |        |        |        |        |
| Cereals           | 23.66  | 84.4   | 24.5   | 24.42  | 30.06  |
| Fiber             | 0      | 0.01   | 0      | 0      | 0      |
| Fruit             | 0.4    | 1.37   | 0.38   | 0.36   | 0.43   |
| Livestock         | 2.17   | 6.71   | 1.71   | 1.09   | 0.73   |
| Oil crops         | 2.51   | 8.6    | 2.41   | 2.5    | 3.2    |
| Pulses            | 0.23   | 0.83   | 0.25   | 0.2    | 0.2    |
| Roots & tubers    | 1.26   | 4.24   | 1.17   | 1.02   | 1.1    |
| Sugar crops       | 2.33   | 8.03   | 2.31   | 2.22   | 2.69   |
| Vegetables        | 0.66   | 2.2    | 0.61   | 0.5    | 0.5    |
| <b>Mozambique</b> |        |        |        |        |        |
| Cereals           | 9.47   | 25.53  | 3.44   | 3.57   | 0      |
| Fiber             | 0.98   | 1.53   | 0.13   | 5.49   | 0      |
| Fruit             | 0.07   | 0.2    | 0.03   | 0.05   | 0      |
| Livestock         | 0.55   | 1.11   | 0.13   | 0      | 0      |
| Oil crops         | 1.95   | 4.07   | 0.47   | 1.41   | 0      |
| Pulses            | 3.08   | 5.02   | 0.48   | 0.28   | 0      |

|                    |       |        |      |       |       |
|--------------------|-------|--------|------|-------|-------|
| Roots & tubers     | 3.93  | 9.41   | 1.17 | 0.54  | 0     |
| Sugar crops        | 0.21  | 0.74   | 0.11 | 0     | 0     |
| Vegetables         | 0.1   | 0.19   | 0.02 | 0.05  | 0     |
| <b>Myanmar</b>     |       |        |      |       |       |
| Cereals            | 95.09 | 176.81 | 9.95 | 3.86  | 0     |
| Fiber              | 3.42  | 5.78   | 0.28 | 0.67  | 0     |
| Fruit              | 0.94  | 1.58   | 0.07 | 0.03  | 0     |
| Livestock          | 5.01  | 7.69   | 0.32 | 0.55  | 0     |
| Oil crops          | 51.89 | 86.59  | 3.97 | 1.4   | 0     |
| Pulses             | 52.37 | 87.83  | 4.14 | 1.49  | 0     |
| Roots & tubers     | 1.27  | 2.14   | 0.1  | 0.04  | 0     |
| Sugar crops        | 1.56  | 2.43   | 0.1  | 0.04  | 0     |
| Vegetables         | 0.61  | 1.03   | 0.05 | 0.02  | 0     |
| <b>Namibia</b>     |       |        |      |       |       |
| Cereals            | 0.83  | 2.7    | 0.4  | 0.26  | 0     |
| Fiber              | 0     | 0      | 0    | 0     | 0     |
| Fruit              | 0.01  | 0.03   | 0.01 | 0.02  | 0     |
| Livestock          | 0.32  | 0.53   | 0.05 | 0.15  | 0     |
| Oil crops          | 0     | 0      | 0    | 0     | 0     |
| Pulses             | 0.02  | 0.09   | 0.01 | 0.05  | 0     |
| Roots & tubers     | 0     | 0      | 0    | 0     | 0     |
| Sugar crops        | 0     | 0      | 0    | 0     | 0     |
| Vegetables         | 0     | 0.01   | 0    | 0.01  | 0     |
| <b>Nepal</b>       |       |        |      |       |       |
| Cereals            | 44.63 | 83.89  | 9.55 | 1.85  | 0     |
| Fiber              | 0     | 0      | 0    | 0     | 0     |
| Fruit              | 0.06  | 0.09   | 0.01 | 0     | 0     |
| Livestock          | 1.66  | 2.99   | 0.33 | 0.06  | 0     |
| Oil crops          | 1.01  | 1.94   | 0.22 | 0.04  | 0     |
| Pulses             | 0.59  | 1.04   | 0.11 | 0.02  | 0     |
| Roots & tubers     | 3.6   | 6.56   | 0.73 | 0.14  | 0     |
| Sugar crops        | 0.4   | 0.74   | 0.08 | 0.02  | 0     |
| Vegetables         | 0     | 0      | 0    | 0     | 0     |
| <b>Netherlands</b> |       |        |      |       |       |
| Cereals            | 1.5   | 9.11   | 6.04 | 27.41 | 12.19 |
| Fiber              | 0     | 0      | 0    | 0     | 0     |
| Fruit              | 0.01  | 0.07   | 0.04 | 0.19  | 0.08  |
| Livestock          | 1.51  | 8.92   | 5.74 | 14.02 | 3.36  |
| Oil crops          | 0     | 0.12   | 0.14 | 0.93  | 0.44  |
| Pulses             | 0.01  | 0.08   | 0.05 | 0.23  | 0.1   |
| Roots & tubers     | 0.63  | 4.65   | 3.6  | 20.24 | 9.66  |
| Sugar crops        | 0.94  | 5.37   | 3.46 | 17    | 7.85  |
| Vegetables         | 0.11  | 0.63   | 0.4  | 1.73  | 0.76  |
| <b>New Zealand</b> |       |        |      |       |       |
| Cereals            | 0.02  | 0.59   | 0.9  | 4.54  | 23.14 |
| Fiber              | 0     | 0      | 0    | 0     | 0     |

|                  |        |        |       |       |       |
|------------------|--------|--------|-------|-------|-------|
| Fruit            | 0      | 0.02   | 0.03  | 0.17  | 0.86  |
| Livestock        | 0.03   | 0.81   | 1.18  | 5.35  | 23.32 |
| Oil crops        | 0      | 0.01   | 0.01  | 0.07  | 0.37  |
| Pulses           | 0      | 0.03   | 0.05  | 0.23  | 1.17  |
| Roots & tubers   | 0      | 0.06   | 0.09  | 0.46  | 2.35  |
| Sugar crops      | 0      | 0      | 0     | 0     | 0     |
| Vegetables       | 0      | 0      | 0.01  | 0.04  | 0.19  |
| <b>Nicaragua</b> |        |        |       |       |       |
| Cereals          | 2.79   | 5.97   | 4.77  | 2.77  | 2.83  |
| Fiber            | 0.03   | 0.05   | 0.04  | 0.03  | 0.03  |
| Fruit            | 0.06   | 0.12   | 0.1   | 0.06  | 0.07  |
| Livestock        | 0.22   | 0.52   | 0.61  | 0.44  | 0.59  |
| Oil crops        | 0.2    | 0.44   | 0.35  | 0.21  | 0.23  |
| Pulses           | 2.43   | 4.54   | 1.88  | 1.01  | 0.9   |
| Roots & tubers   | 0.06   | 0.14   | 0.11  | 0.07  | 0.07  |
| Sugar crops      | 0.31   | 0.65   | 0.52  | 0.31  | 0.34  |
| Vegetables       | 0      | 0.01   | 0.01  | 0     | 0     |
| <b>Niger</b>     |        |        |       |       |       |
| Cereals          | 42.02  | 58.31  | 4.42  | 13.09 | 0     |
| Fiber            | 0.25   | 0.33   | 0.02  | 0     | 0     |
| Fruit            | 0.03   | 0.04   | 0     | 0.01  | 0     |
| Livestock        | 1.99   | 2.66   | 0.19  | 0.18  | 0     |
| Oil crops        | 2.39   | 3.29   | 0.25  | 0.52  | 0     |
| Pulses           | 0.29   | 0.4    | 0.03  | 0.06  | 0     |
| Roots & tubers   | 0.31   | 0.42   | 0.03  | 0.08  | 0     |
| Sugar crops      | 0.05   | 0.06   | 0     | 0     | 0     |
| Vegetables       | 0.35   | 0.47   | 0.03  | 0.08  | 0     |
| <b>Nigeria</b>   |        |        |       |       |       |
| Cereals          | 253.94 | 441.36 | 43.63 | 12.29 | 0     |
| Fiber            | 8.93   | 16.89  | 1.8   | 0.01  | 0     |
| Fruit            | 3.44   | 6.9    | 0.78  | 1.08  | 0     |
| Livestock        | 6.09   | 11.45  | 1.23  | 5.31  | 0     |
| Oil crops        | 34.15  | 63.11  | 6.59  | 5.91  | 0     |
| Pulses           | 0.25   | 0.44   | 0.04  | 0     | 0     |
| Roots & tubers   | 75.42  | 155.84 | 17.76 | 25.21 | 0     |
| Sugar crops      | 0.25   | 0.3    | 0.02  | 0     | 0     |
| Vegetables       | 2.72   | 3.81   | 0.29  | 0.21  | 0     |
| <b>Norway</b>    |        |        |       |       |       |
| Cereals          | 1.9    | 14.04  | 9.97  | 18.62 | 1.87  |
| Fiber            | 0      | 0      | 0     | 0     | 0     |
| Fruit            | 0      | 0      | 0     | 0.01  | 0     |
| Livestock        | 0.08   | 1      | 0.94  | 2.17  | 0.3   |
| Oil crops        | 0.07   | 0.48   | 0.34  | 0.64  | 0.06  |
| Pulses           | 0      | 0      | 0     | 0     | 0     |
| Roots & tubers   | 0.08   | 0.6    | 0.43  | 0.8   | 0.08  |
| Sugar crops      | 0      | 0      | 0     | 0     | 0     |

|                         |       |        |       |       |       |
|-------------------------|-------|--------|-------|-------|-------|
| Vegetables              | 0     | 0.01   | 0.01  | 0.01  | 0     |
| <b>Oman</b>             |       |        |       |       |       |
| Cereals                 | 0.05  | 0.22   | 0.08  | 0.04  | 0.01  |
| Fiber                   | 0     | 0      | 0     | 0     | 0     |
| Fruit                   | 0.26  | 1.19   | 0.44  | 0.21  | 0.04  |
| Livestock               | 0.04  | 0.18   | 0.07  | 0.03  | 0.01  |
| Oil crops               | 0     | 0      | 0     | 0     | 0     |
| Pulses                  | 0     | 0      | 0     | 0     | 0     |
| Roots & tubers          | 0     | 0.02   | 0.01  | 0     | 0     |
| Sugar crops             | 0     | 0      | 0     | 0     | 0     |
| Vegetables              | 0.01  | 0.06   | 0.02  | 0.01  | 0     |
| <b>Pakistan</b>         |       |        |       |       |       |
| Cereals                 | 255.4 | 600.1  | 75.99 | 14.62 | 0     |
| Fiber                   | 83.48 | 216.99 | 28.35 | 5.5   | 0     |
| Fruit                   | 1.64  | 3.83   | 0.49  | 0.09  | 0     |
| Livestock               | 18.09 | 30.33  | 3.26  | 0.62  | 0     |
| Oil crops               | 19.49 | 44.7   | 5.62  | 1.08  | 0     |
| Pulses                  | 3.63  | 8.22   | 1.03  | 0.2   | 0     |
| Roots & tubers          | 3.49  | 7.51   | 0.91  | 0.18  | 0     |
| Sugar crops             | 6.64  | 15.97  | 2.04  | 0.39  | 0     |
| Vegetables              | 1.22  | 3.02   | 0.39  | 0.07  | 0     |
| <b>Panama</b>           |       |        |       |       |       |
| Cereals                 | 0.47  | 1.27   | 1.62  | 0.72  | 0.4   |
| Fiber                   | 0     | 0      | 0     | 0     | 0     |
| Fruit                   | 0.15  | 0.39   | 0.47  | 0.22  | 0.15  |
| Livestock               | 0.46  | 0.91   | 0.51  | 0.23  | 0.13  |
| Oil crops               | 0.02  | 0.06   | 0.08  | 0.04  | 0.03  |
| Pulses                  | 0.03  | 0.07   | 0.09  | 0.05  | 0.05  |
| Roots & tubers          | 0.03  | 0.08   | 0.12  | 0.05  | 0.03  |
| Sugar crops             | 0.07  | 0.22   | 0.36  | 0.15  | 0.07  |
| Vegetables              | 0.01  | 0.03   | 0.03  | 0.02  | 0.01  |
| <b>Papua New Guinea</b> |       |        |       |       |       |
| Cereals                 | 0.13  | 0.15   | 0.05  | 0.03  | 0     |
| Fiber                   | 0     | 0      | 0     | 0     | 0     |
| Fruit                   | 0.47  | 0.69   | 0.26  | 0.14  | 0     |
| Livestock               | 0.29  | 0.22   | 0.06  | 0.03  | 0     |
| Oil crops               | 3.45  | 5.04   | 1.94  | 1.05  | 0     |
| Pulses                  | 0.01  | 0.01   | 0     | 0     | 0     |
| Roots & tubers          | 1.26  | 1.79   | 0.68  | 0.37  | 0     |
| Sugar crops             | 0.05  | 0.07   | 0.03  | 0.02  | 0     |
| Vegetables              | 0     | 0      | 0     | 0     | 0     |
| <b>Paraguay</b>         |       |        |       |       |       |
| Cereals                 | 0.25  | 4.23   | 4.45  | 10.69 | 50.02 |
| Fiber                   | 0.06  | 0.97   | 0.97  | 1.76  | 4.93  |
| Fruit                   | 0     | 0.02   | 0.03  | 0.07  | 0.29  |
| Livestock               | 0.05  | 0.82   | 0.82  | 1.47  | 3.86  |

|                    |       |        |       |        |        |
|--------------------|-------|--------|-------|--------|--------|
| Oil crops          | 0.47  | 11.64  | 18.74 | 94.17  | 617.76 |
| Pulses             | 0.04  | 0.62   | 0.59  | 0.92   | 2.01   |
| Roots & tubers     | 0.02  | 0.43   | 0.52  | 1.7    | 8.8    |
| Sugar crops        | 0.01  | 0.16   | 0.19  | 0.45   | 1.05   |
| Vegetables         | 0     | 0.02   | 0.02  | 0.06   | 0.16   |
| <b>Peru</b>        |       |        |       |        |        |
| Cereals            | 0.95  | 14.72  | 13.53 | 17.1   | 20.91  |
| Fiber              | 0.16  | 2.47   | 2.27  | 2.91   | 3.64   |
| Fruit              | 0.11  | 1.76   | 1.62  | 2.09   | 2.73   |
| Livestock          | 0.22  | 3.34   | 2.98  | 3.29   | 2.72   |
| Oil crops          | 0.03  | 0.47   | 0.43  | 0.55   | 0.68   |
| Pulses             | 0.11  | 1.72   | 1.55  | 1.77   | 1.45   |
| Roots & tubers     | 0.29  | 4.49   | 4.2   | 5.72   | 7.98   |
| Sugar crops        | 0.05  | 0.77   | 0.72  | 0.94   | 1.24   |
| Vegetables         | 0.02  | 0.37   | 0.34  | 0.38   | 0.37   |
| <b>Philippines</b> |       |        |       |        |        |
| Cereals            | 43.23 | 126.75 | 10.93 | 102.25 | 0      |
| Fiber              | 0.04  | 0.08   | 0.01  | 0.04   | 0      |
| Fruit              | 2.8   | 7.22   | 0.57  | 3.63   | 0      |
| Livestock          | 7.15  | 15.55  | 0.99  | 1.44   | 0      |
| Oil crops          | 37.03 | 95.59  | 7.48  | 48.04  | 0      |
| Pulses             | 0.36  | 0.94   | 0.07  | 0.47   | 0      |
| Roots & tubers     | 1.57  | 4.09   | 0.32  | 1.19   | 0      |
| Sugar crops        | 3.87  | 10.11  | 0.76  | 1.09   | 0      |
| Vegetables         | 0.12  | 0.32   | 0.03  | 0.16   | 0      |
| <b>Poland</b>      |       |        |       |        |        |
| Cereals            | 37.9  | 152.38 | 70.23 | 241.99 | 94.22  |
| Fiber              | 0     | 0      | 0     | 0      | 0      |
| Fruit              | 0.17  | 0.62   | 0.25  | 0.68   | 0.23   |
| Livestock          | 3.37  | 12.45  | 4.98  | 13.33  | 4.34   |
| Oil crops          | 5.52  | 36.6   | 27.39 | 140.66 | 63.83  |
| Pulses             | 0.41  | 1.53   | 0.62  | 1.65   | 0.54   |
| Roots & tubers     | 7.19  | 24.42  | 8.03  | 16.54  | 4.56   |
| Sugar crops        | 3.29  | 15.41  | 8.67  | 33.36  | 13.33  |
| Vegetables         | 0.26  | 0.94   | 0.37  | 0.99   | 0.34   |
| <b>Portugal</b>    |       |        |       |        |        |
| Cereals            | 1.81  | 7.02   | 3.03  | 10.68  | 4.35   |
| Fiber              | 0     | 0      | 0     | 0      | 0      |
| Fruit              | 0.5   | 1.63   | 0.48  | 0.89   | 0.24   |
| Livestock          | 0.95  | 3.43   | 1.25  | 2.44   | 0.58   |
| Oil crops          | 0.38  | 1.47   | 0.64  | 3.19   | 1.55   |
| Pulses             | 0.01  | 0.05   | 0.02  | 0.09   | 0.04   |
| Roots & tubers     | 0.49  | 1.71   | 0.57  | 0.81   | 0.09   |
| Sugar crops        | 0.04  | 0.33   | 0.29  | 1.26   | 0.51   |
| Vegetables         | 0.19  | 0.7    | 0.29  | 1.2    | 0.54   |
| <b>Qatar</b>       |       |        |       |        |        |

|                           |        |        |        |         |        |
|---------------------------|--------|--------|--------|---------|--------|
| Cereals                   | 0      | 0      | 0      | 0       | 0      |
| Fiber                     | 0      | 0      | 0      | 0       | 0      |
| Fruit                     | 0      | 0      | 0      | 0       | 0      |
| Livestock                 | 0.03   | 0.12   | 0.04   | 0.02    | 0      |
| Oil crops                 | 0      | 0      | 0      | 0       | 0      |
| Pulses                    | 0      | 0      | 0      | 0       | 0      |
| Roots & tubers            | 0      | 0      | 0      | 0       | 0      |
| Sugar crops               | 0      | 0      | 0      | 0       | 0      |
| Vegetables                | 0      | 0      | 0      | 0       | 0      |
| <b>Republic of Korea</b>  |        |        |        |         |        |
| Cereals                   | 24.78  | 34.08  | 1.05   | 0.29    | 0      |
| Fiber                     | 0      | 0      | 0      | 0       | 0      |
| Fruit                     | 0.67   | 0.93   | 0.03   | 0.01    | 0      |
| Livestock                 | 9.24   | 12.71  | 0.39   | 0.11    | 0      |
| Oil crops                 | 11.2   | 14.91  | 0.43   | 0.12    | 0      |
| Pulses                    | 0.2    | 0.27   | 0.01   | 0       | 0      |
| Roots & tubers            | 2.25   | 3.07   | 0.09   | 0.03    | 0      |
| Sugar crops               | 0      | 0      | 0      | 0       | 0      |
| Vegetables                | 1.27   | 1.74   | 0.05   | 0.01    | 0      |
| <b>Romania</b>            |        |        |        |         |        |
| Cereals                   | 20.39  | 92.16  | 50.98  | 196.37  | 77.66  |
| Fiber                     | 0      | 0      | 0      | 0       | 0      |
| Fruit                     | 0.1    | 0.5    | 0.33   | 1.61    | 0.71   |
| Livestock                 | 1.19   | 4.77   | 2.15   | 6.52    | 2.33   |
| Oil crops                 | 3.53   | 18.21  | 11.71  | 53.37   | 22.8   |
| Pulses                    | 0.25   | 0.98   | 0.44   | 1.22    | 0.41   |
| Roots & tubers            | 1.83   | 7.39   | 3.32   | 7.77    | 2.04   |
| Sugar crops               | 0.43   | 1.62   | 0.66   | 1.97    | 0.73   |
| Vegetables                | 0.13   | 0.56   | 0.28   | 1.03    | 0.4    |
| <b>Russian Federation</b> |        |        |        |         |        |
| Cereals                   | 119.77 | 511.85 | 259.69 | 1235.38 | 571.89 |
| Fiber                     | 0      | 0      | 0      | 0       | 0      |
| Fruit                     | 0.07   | 0.39   | 0.26   | 1.59    | 0.8    |
| Livestock                 | 6.26   | 24.79  | 11.33  | 39.29   | 15.24  |
| Oil crops                 | 13.44  | 62.23  | 34.72  | 174.44  | 81.68  |
| Pulses                    | 2.6    | 11.2   | 5.6    | 22.45   | 9.6    |
| Roots & tubers            | 15.31  | 60.12  | 26.3   | 85.3    | 32.61  |
| Sugar crops               | 7.93   | 29.97  | 12.98  | 76.17   | 39.13  |
| Vegetables                | 0.44   | 1.83   | 0.88   | 3.65    | 1.6    |
| <b>Rwanda</b>             |        |        |        |         |        |
| Cereals                   | 3.74   | 6.17   | 0.59   | 0       | 0      |
| Fiber                     | 0      | 0      | 0      | 0       | 0      |
| Fruit                     | 3.69   | 6.06   | 0.58   | 0       | 0      |
| Livestock                 | 0.29   | 0.4    | 0.03   | 0       | 0      |
| Oil crops                 | 2.01   | 2.57   | 0.16   | 0       | 0      |
| Pulses                    | 6.07   | 9.52   | 0.86   | 0       | 0      |

|                                         |       |       |       |       |       |
|-----------------------------------------|-------|-------|-------|-------|-------|
| Roots & tubers                          | 4.89  | 6.98  | 0.55  | 0     | 0     |
| Sugar crops                             | 0.01  | 0.02  | 0     | 0     | 0     |
| Vegetables                              | 0.04  | 0.05  | 0     | 0     | 0     |
| <b>Saint Lucia</b>                      |       |       |       |       |       |
| Cereals                                 | 0     | 0     | 0     | 0     | 0     |
| Fiber                                   | 0     | 0     | 0     | 0     | 0     |
| Fruit                                   | 0     | 0     | 0     | 0     | 0     |
| Livestock                               | 0     | 0     | 0     | 0     | 0     |
| Oil crops                               | 0     | 0     | 0     | 0     | 0     |
| Pulses                                  | 0     | 0     | 0     | 0     | 0     |
| Roots & tubers                          | 0     | 0     | 0     | 0     | 0     |
| Sugar crops                             | 0     | 0     | 0     | 0     | 0     |
| Vegetables                              | 0     | 0     | 0     | 0     | 0     |
| <b>Saint Vincent and the Grenadines</b> |       |       |       |       |       |
| Cereals                                 | 0     | 0     | 0     | 0     | 0     |
| Fiber                                   | 0     | 0     | 0     | 0     | 0     |
| Fruit                                   | 0     | 0     | 0     | 0     | 0     |
| Livestock                               | 0     | 0     | 0     | 0     | 0     |
| Oil crops                               | 0     | 0     | 0     | 0     | 0     |
| Pulses                                  | 0     | 0     | 0     | 0     | 0     |
| Roots & tubers                          | 0     | 0     | 0     | 0     | 0     |
| Sugar crops                             | 0     | 0     | 0     | 0     | 0     |
| Vegetables                              | 0     | 0     | 0     | 0     | 0     |
| <b>Saudi Arabia</b>                     |       |       |       |       |       |
| Cereals                                 | 15.94 | 59.21 | 18.6  | 9.01  | 1.56  |
| Fiber                                   | 0     | 0     | 0     | 0     | 0     |
| Fruit                                   | 1.38  | 4.9   | 1.45  | 0.71  | 0.12  |
| Livestock                               | 0.98  | 5.21  | 1.94  | 1     | 0.17  |
| Oil crops                               | 0.22  | 0.46  | 0.06  | 0.02  | 0     |
| Pulses                                  | 0.01  | 0.05  | 0.02  | 0.01  | 0     |
| Roots & tubers                          | 0.41  | 1.51  | 0.48  | 0.23  | 0.04  |
| Sugar crops                             | 0     | 0     | 0     | 0     | 0     |
| Vegetables                              | 0.24  | 0.75  | 0.2   | 0.1   | 0.02  |
| <b>Senegal</b>                          |       |       |       |       |       |
| Cereals                                 | 8.01  | 16.73 | 1.97  | 0.01  | 0     |
| Fiber                                   | 0.54  | 1.76  | 0.26  | 0     | 0     |
| Fruit                                   | 0.03  | 0.04  | 0     | 0     | 0     |
| Livestock                               | 0.54  | 1.26  | 0.16  | 0     | 0     |
| Oil crops                               | 1.32  | 1.62  | 0.11  | 0     | 0     |
| Pulses                                  | 0     | 0     | 0     | 0     | 0     |
| Roots & tubers                          | 0.32  | 0.39  | 0.03  | 0     | 0     |
| Sugar crops                             | 0.08  | 0.29  | 0.04  | 0     | 0     |
| Vegetables                              | 0.15  | 0.3   | 0.03  | 0     | 0     |
| <b>Serbia</b>                           |       |       |       |       |       |
| Cereals                                 | 18.98 | 69.67 | 27.36 | 72.13 | 23.51 |



|                     |      |       |       |       |       |
|---------------------|------|-------|-------|-------|-------|
| Fiber               | 0    | 0     | 0     | 0     | 0     |
| Fruit               | 0.19 | 0.6   | 0.18  | 0.4   | 0.13  |
| Oil crops           | 5.37 | 20.92 | 9.14  | 26.02 | 8.71  |
| Pulses              | 0.43 | 1.45  | 0.48  | 1.16  | 0.37  |
| Roots & tubers      | 0.4  | 1.5   | 0.61  | 1.76  | 0.62  |
| Sugar crops         | 2.52 | 7.96  | 2.23  | 5.19  | 1.79  |
| Vegetables          | 0.07 | 0.24  | 0.09  | 0.2   | 0.06  |
| <b>Sierra Leone</b> |      |       |       |       |       |
| Cereals             | 2.47 | 5.68  | 0.7   | 0     | 0     |
| Fiber               | 0    | 0     | 0     | 0     | 0     |
| Fruit               | 0.03 | 0.1   | 0.01  | 0     | 0     |
| Livestock           | 0.11 | 0.15  | 0.01  | 0     | 0     |
| Oil crops           | 0.12 | 0.26  | 0.03  | 0     | 0     |
| Pulses              | 0.17 | 0.52  | 0.07  | 0     | 0     |
| Roots & tubers      | 1.04 | 2.49  | 0.31  | 0     | 0     |
| Sugar crops         | 0.01 | 0.02  | 0     | 0     | 0     |
| Vegetables          | 0.01 | 0.03  | 0     | 0     | 0     |
| <b>Slovakia</b>     |      |       |       |       |       |
| Cereals             | 7.62 | 29.17 | 12.64 | 38.22 | 13.38 |
| Fiber               | 0    | 0     | 0     | 0     | 0     |
| Fruit               | 0.03 | 0.09  | 0.02  | 0.05  | 0.02  |
| Livestock           | 0.2  | 0.92  | 0.49  | 1.37  | 0.43  |
| Oil crops           | 3.95 | 14.76 | 6.24  | 18.99 | 6.67  |
| Pulses              | 0.09 | 0.34  | 0.15  | 0.45  | 0.16  |
| Roots & tubers      | 0.11 | 0.46  | 0.24  | 0.66  | 0.2   |
| Sugar crops         | 0.5  | 2.15  | 1.09  | 3.29  | 1.08  |
| Vegetables          | 0.02 | 0.06  | 0.02  | 0.07  | 0.03  |
| <b>Slovenia</b>     |      |       |       |       |       |
| Cereals             | 2.45 | 8.16  | 2.39  | 2.65  | 0.12  |
| Fiber               | 0    | 0     | 0     | 0     | 0     |
| Fruit               | 0.07 | 0.26  | 0.08  | 0.1   | 0     |
| Livestock           | 0.31 | 1.01  | 0.27  | 0.28  | 0.01  |
| Oil crops           | 0.22 | 0.74  | 0.22  | 0.24  | 0.01  |
| Pulses              | 0.05 | 0.18  | 0.06  | 0.06  | 0     |
| Roots & tubers      | 0.11 | 0.38  | 0.12  | 0.14  | 0.01  |
| Sugar crops         | 0.17 | 0.55  | 0.16  | 0.18  | 0.01  |
| Vegetables          | 0    | 0.01  | 0     | 0     | 0     |
| <b>Somalia</b>      |      |       |       |       |       |
| Cereals             | 3.01 | 4.46  | 0.35  | 0     | 0     |
| Fiber               | 0.13 | 0.21  | 0.02  | 0     | 0     |
| Fruit               | 0.06 | 0.1   | 0.01  | 0     | 0     |
| Livestock           | 1.25 | 2.31  | 0.25  | 0     | 0     |
| Oil crops           | 2.82 | 4.31  | 0.36  | 0     | 0     |
| Pulses              | 0.38 | 0.64  | 0.06  | 0     | 0     |
| Roots & tubers      | 0.07 | 0.11  | 0.01  | 0     | 0     |
| Sugar crops         | 0.03 | 0.05  | 0     | 0     | 0     |

|                       |       |        |       |        |       |
|-----------------------|-------|--------|-------|--------|-------|
| Vegetables            | 0.01  | 0.01   | 0     | 0      | 0     |
| <b>South Africa</b>   |       |        |       |        |       |
| Cereals               | 14.54 | 90.29  | 15.3  | 194.55 | 0     |
| Fiber                 | 0.2   | 1.08   | 0.18  | 0.61   | 0     |
| Fruit                 | 1.89  | 4.44   | 0.57  | 1.86   | 0     |
| Livestock             | 3.66  | 11.14  | 1.57  | 12.84  | 0     |
| Oil crops             | 7.89  | 27.39  | 4.05  | 21.46  | 0     |
| Pulses                | 0.16  | 1.35   | 0.24  | 1.69   | 0     |
| Roots & tubers        | 1.25  | 5.38   | 0.85  | 3.67   | 0     |
| Sugar crops           | 0.57  | 5.65   | 1.01  | 2.98   | 0     |
| Vegetables            | 0.25  | 0.97   | 0.15  | 0.55   | 0     |
| <b>Spain</b>          |       |        |       |        |       |
| Cereals               | 33.29 | 152.27 | 81.88 | 271.1  | 98.21 |
| Fiber                 | 0.19  | 1.12   | 0.81  | 5.89   | 3.07  |
| Fruit                 | 2.28  | 8.31   | 3.17  | 8.36   | 2.81  |
| Livestock             | 7.16  | 24.46  | 8.11  | 15.07  | 3.45  |
| Oil crops             | 4.69  | 22.61  | 13.41 | 79.06  | 39.13 |
| Pulses                | 0.53  | 2.14   | 0.99  | 3.58   | 1.46  |
| Roots & tubers        | 0.97  | 4.28   | 2.1   | 5.68   | 1.81  |
| Sugar crops           | 0.93  | 5.83   | 4.16  | 18.37  | 7.75  |
| Vegetables            | 0.76  | 3.07   | 1.41  | 5.14   | 2.09  |
| <b>Sri Lanka</b>      |       |        |       |        |       |
| Cereals               | 7.3   | 13.84  | 1.59  | 4.68   | 0     |
| Fiber                 | 0     | 0      | 0     | 0      | 0     |
| Fruit                 | 0.47  | 1.04   | 0.13  | 0.48   | 0     |
| Livestock             | 0.72  | 1.03   | 0.1   | 0.07   | 0     |
| Oil crops             | 7.38  | 13.72  | 1.57  | 4.2    | 0     |
| Pulses                | 0.1   | 0.23   | 0.03  | 0.13   | 0     |
| Roots & tubers        | 0.28  | 0.59   | 0.07  | 0.22   | 0     |
| Sugar crops           | 0.09  | 0.22   | 0.03  | 0.15   | 0     |
| Vegetables            | 0.09  | 0.19   | 0.02  | 0.09   | 0     |
| <b>Sudan (former)</b> |       |        |       |        |       |
| Cereals               | 15.24 | 81.42  | 29.63 | 34.42  | 46    |
| Fiber                 | 1.58  | 6      | 1.8   | 2.17   | 3.03  |
| Fruit                 | 0.44  | 1.61   | 0.47  | 0.57   | 0.81  |
| Livestock             | 2.23  | 9.08   | 2.87  | 2.59   | 2.81  |
| Oil crops             | 6.97  | 20.95  | 5.04  | 5.49   | 7.34  |
| Pulses                | 0.19  | 0.72   | 0.21  | 0.24   | 0.32  |
| Roots & tubers        | 0.39  | 1.36   | 0.38  | 0.45   | 0.63  |
| Sugar crops           | 0.44  | 1.56   | 0.44  | 0.5    | 0.66  |
| Vegetables            | 0.44  | 1.54   | 0.43  | 0.49   | 0.65  |
| <b>Suriname</b>       |       |        |       |        |       |
| Cereals               | 0     | 0.01   | 0.03  | 0.17   | 1.19  |
| Fiber                 | 0     | 0      | 0     | 0      | 0     |
| Fruit                 | 0     | 0      | 0     | 0.02   | 0.13  |
| Livestock             | 0     | 0      | 0     | 0.01   | 0.1   |

|                             |       |        |       |       |       |
|-----------------------------|-------|--------|-------|-------|-------|
| Oil crops                   | 0     | 0      | 0     | 0.01  | 0.06  |
| Pulses                      | 0     | 0      | 0     | 0     | 0     |
| Roots & tubers              | 0     | 0      | 0     | 0     | 0.01  |
| Sugar crops                 | 0     | 0      | 0     | 0.01  | 0.04  |
| Vegetables                  | 0     | 0      | 0     | 0     | 0     |
| <b>Swaziland</b>            |       |        |       |       |       |
| Cereals                     | 0.44  | 0.92   | 0.11  | 0.03  | 0     |
| Fiber                       | 0.03  | 0.08   | 0.01  | 0.01  | 0     |
| Fruit                       | 0.02  | 0.05   | 0.01  | 0     | 0     |
| Livestock                   | 0.08  | 0.18   | 0.02  | 0.05  | 0     |
| Oil crops                   | 0     | 0      | 0     | 0     | 0     |
| Pulses                      | 0.02  | 0.04   | 0.01  | 0     | 0     |
| Roots & tubers              | 0.01  | 0.03   | 0     | 0     | 0     |
| Sugar crops                 | 0.72  | 1.57   | 0.19  | 0.06  | 0     |
| Vegetables                  | 0     | 0.01   | 0     | 0     | 0     |
| <b>Sweden</b>               |       |        |       |       |       |
| Cereals                     | 4.31  | 34.95  | 26.59 | 76.3  | 22.24 |
| Fiber                       | 0     | 0      | 0     | 0     | 0     |
| Fruit                       | 0     | 0      | 0     | 0.01  | 0     |
| Livestock                   | 0.18  | 1.43   | 1.09  | 3.53  | 1.2   |
| Oil crops                   | 1.01  | 7.64   | 5.53  | 15.09 | 4.27  |
| Pulses                      | 0.06  | 0.52   | 0.42  | 1.2   | 0.33  |
| Roots & tubers              | 0.19  | 1.32   | 0.91  | 2.05  | 0.44  |
| Sugar crops                 | 0.58  | 4      | 2.69  | 5.53  | 0.97  |
| Vegetables                  | 0     | 0.02   | 0.02  | 0.05  | 0.01  |
| <b>Switzerland</b>          |       |        |       |       |       |
| Cereals                     | 1.75  | 9.45   | 6.19  | 13.34 | 1.83  |
| Fiber                       | 0     | 0      | 0     | 0     | 0     |
| Fruit                       | 0.03  | 0.2    | 0.14  | 0.3   | 0.04  |
| Livestock                   | 0.27  | 1.87   | 1.34  | 2.68  | 0.31  |
| Oil crops                   | 0.89  | 3.61   | 1.75  | 3.47  | 0.47  |
| Pulses                      | 0.04  | 0.25   | 0.17  | 0.37  | 0.05  |
| Roots & tubers              | 0.06  | 0.64   | 0.56  | 1.24  | 0.16  |
| Sugar crops                 | 0.18  | 2.03   | 1.82  | 4.09  | 0.55  |
| Vegetables                  | 0     | 0.02   | 0.01  | 0.03  | 0     |
| <b>Syrian Arab Republic</b> |       |        |       |       |       |
| Cereals                     | 37.95 | 107.82 | 25.42 | 15.78 | 11.04 |
| Fiber                       | 6.46  | 21.68  | 6.19  | 4.71  | 4.5   |
| Fruit                       | 0.25  | 0.89   | 0.27  | 0.21  | 0.21  |
| Livestock                   | 1.59  | 5.8    | 1.74  | 0.95  | 0.34  |
| Oil crops                   | 3.4   | 10.96  | 3     | 2.28  | 2.19  |
| Pulses                      | 0.08  | 0.26   | 0.07  | 0.06  | 0.05  |
| Roots & tubers              | 0.55  | 1.76   | 0.48  | 0.35  | 0.33  |
| Sugar crops                 | 1.47  | 4.41   | 1.13  | 0.65  | 0.36  |
| Vegetables                  | 0.4   | 1.41   | 0.42  | 0.32  | 0.29  |
| <b>Tajikistan</b>           |       |        |       |       |       |

|                                                      |       |        |       |      |      |
|------------------------------------------------------|-------|--------|-------|------|------|
| Cereals                                              | 3.03  | 13.5   | 4.52  | 3.94 | 4.09 |
| Fiber                                                | 2.47  | 10.85  | 3.61  | 3.19 | 3.38 |
| Fruit                                                | 0.05  | 0.23   | 0.08  | 0.07 | 0.07 |
| Livestock                                            | 0.12  | 0.58   | 0.2   | 0.21 | 0.27 |
| Oil crops                                            | 0.02  | 0.08   | 0.03  | 0.02 | 0.02 |
| Pulses                                               | 0.06  | 0.3    | 0.11  | 0.08 | 0.07 |
| Roots & tubers                                       | 0.36  | 1.62   | 0.54  | 0.48 | 0.5  |
| Sugar crops                                          | 0     | 0      | 0     | 0    | 0    |
| Vegetables                                           | 0.1   | 0.43   | 0.14  | 0.13 | 0.13 |
| <b>Thailand</b>                                      |       |        |       |      |      |
| Cereals                                              | 81.76 | 246.05 | 21.15 | 9.22 | 0    |
| Fiber                                                | 0.14  | 0.42   | 0.04  | 0.02 | 0    |
| Fruit                                                | 1.94  | 4.9    | 0.38  | 0.16 | 0    |
| Livestock                                            | 4.44  | 21.19  | 2.21  | 1    | 0    |
| Oil crops                                            | 14.72 | 43.47  | 3.75  | 1.64 | 0    |
| Pulses                                               | 2.31  | 4.57   | 0.28  | 0.11 | 0    |
| Roots & tubers                                       | 9.82  | 36.1   | 3.46  | 1.55 | 0    |
| Sugar crops                                          | 7.58  | 17.55  | 1.27  | 0.53 | 0    |
| Vegetables                                           | 0.12  | 0.3    | 0.02  | 0.01 | 0    |
| <b>The former Yugoslav<br/>Republic of Macedonia</b> |       |        |       |      |      |
| Cereals                                              | 1.1   | 5.88   | 3.62  | 7.15 | 0.86 |
| Fiber                                                | 0     | 0      | 0     | 0    | 0    |
| Fruit                                                | 0.06  | 0.31   | 0.18  | 0.36 | 0.05 |
| Livestock                                            | 0.1   | 0.36   | 0.14  | 0.19 | 0.01 |
| Oil crops                                            | 0.04  | 0.18   | 0.1   | 0.2  | 0.02 |
| Pulses                                               | 0.03  | 0.15   | 0.09  | 0.17 | 0.02 |
| Roots & tubers                                       | 0.07  | 0.35   | 0.21  | 0.4  | 0.05 |
| Sugar crops                                          | 0.01  | 0.06   | 0.04  | 0.07 | 0.01 |
| Vegetables                                           | 0.02  | 0.12   | 0.07  | 0.14 | 0.02 |
| <b>Togo</b>                                          |       |        |       |      |      |
| Cereals                                              | 7.66  | 14.12  | 1.48  | 0.01 | 0    |
| Fiber                                                | 1.22  | 1.47   | 0.08  | 0    | 0    |
| Fruit                                                | 0.01  | 0.03   | 0     | 0    | 0    |
| Livestock                                            | 0.24  | 0.36   | 0.03  | 0    | 0    |
| Oil crops                                            | 0.14  | 0.25   | 0.03  | 0    | 0    |
| Pulses                                               | 1.14  | 2.17   | 0.24  | 0    | 0    |
| Roots & tubers                                       | 1.54  | 2.7    | 0.27  | 0    | 0    |
| Sugar crops                                          | 0     | 0      | 0     | 0    | 0    |
| Vegetables                                           | 0.01  | 0.01   | 0     | 0    | 0    |
| <b>Trinidad and Tobago</b>                           |       |        |       |      |      |
| Cereals                                              | 0     | 0.01   | 0.03  | 0.03 | 0.04 |
| Fiber                                                | 0     | 0      | 0     | 0    | 0    |
| Fruit                                                | 0     | 0      | 0.01  | 0.01 | 0.02 |
| Livestock                                            | 0     | 0      | 0     | 0    | 0    |
| Oil crops                                            | 0     | 0.02   | 0.06  | 0.06 | 0.09 |

|                     |        |        |        |       |        |
|---------------------|--------|--------|--------|-------|--------|
| Pulses              | 0      | 0      | 0      | 0     | 0      |
| Roots & tubers      | 0      | 0      | 0      | 0     | 0      |
| Sugar crops         | 0      | 0.02   | 0.09   | 0.09  | 0.14   |
| Vegetables          | 0      | 0      | 0      | 0     | 0      |
| <b>Tunisia</b>      |        |        |        |       |        |
| Cereals             | 7.38   | 30.05  | 9.56   | 9.55  | 11.58  |
| Fiber               | 0.01   | 0.05   | 0.02   | 0.02  | 0.02   |
| Fruit               | 0.27   | 0.8    | 0.19   | 0.17  | 0.2    |
| Livestock           | 0.45   | 2.38   | 0.88   | 0.61  | 0.44   |
| Oil crops           | 2.56   | 12.58  | 4.41   | 4.46  | 5.36   |
| Pulses              | 0.06   | 0.27   | 0.09   | 0.1   | 0.12   |
| Roots & tubers      | 0.24   | 0.8    | 0.21   | 0.3   | 0.45   |
| Sugar crops         | 0      | 0      | 0      | 0     | 0      |
| Vegetables          | 0.15   | 0.72   | 0.25   | 0.52  | 0.92   |
| <b>Turkey</b>       |        |        |        |       |        |
| Cereals             | 173.38 | 549.85 | 143.04 | 125.4 | 138.89 |
| Fiber               | 17.11  | 63.59  | 19.63  | 14.41 | 12.61  |
| Fruit               | 2.89   | 8.66   | 2.09   | 1.78  | 1.91   |
| Livestock           | 7.52   | 20.24  | 4.26   | 2.56  | 1.6    |
| Oil crops           | 11.37  | 39.07  | 11     | 7.57  | 5.76   |
| Pulses              | 1.87   | 6      | 1.58   | 1.01  | 0.66   |
| Roots & tubers      | 5.64   | 13.81  | 2.46   | 1.61  | 1.31   |
| Sugar crops         | 17.99  | 48.11  | 9.92   | 6.17  | 4.13   |
| Vegetables          | 4.74   | 14.25  | 3.46   | 2.79  | 2.8    |
| <b>Turkmenistan</b> |        |        |        |       |        |
| Cereals             | 2.2    | 36.74  | 17.27  | 21.43 | 29.37  |
| Fiber               | 0.98   | 16.27  | 7.64   | 9.58  | 13.22  |
| Fruit               | 0.02   | 0.39   | 0.18   | 0.23  | 0.32   |
| Livestock           | 0.16   | 1.85   | 0.84   | 1.13  | 1.66   |
| Oil crops           | 0      | 0      | 0      | 0     | 0      |
| Pulses              | 0.01   | 0.19   | 0.09   | 0.11  | 0.15   |
| Roots & tubers      | 0.02   | 0.45   | 0.22   | 0.23  | 0.29   |
| Sugar crops         | 0.03   | 0.49   | 0.23   | 0.29  | 0.39   |
| Vegetables          | 0.02   | 0.31   | 0.15   | 0.18  | 0.25   |
| <b>Uganda</b>       |        |        |        |       |        |
| Cereals             | 24.32  | 42.54  | 4.31   | 0.02  | 0      |
| Fiber               | 1.03   | 2.04   | 0.23   | 0     | 0      |
| Fruit               | 11.93  | 22.17  | 2.36   | 0.01  | 0      |
| Livestock           | 1.45   | 3.05   | 0.36   | 0     | 0      |
| Oil crops           | 22.09  | 31.01  | 2.44   | 0.01  | 0      |
| Pulses              | 8.83   | 15.88  | 1.65   | 0.01  | 0      |
| Roots & tubers      | 8.53   | 16.53  | 1.8    | 0.01  | 0      |
| Sugar crops         | 0.38   | 0.73   | 0.08   | 0     | 0      |
| Vegetables          | 0.14   | 0.26   | 0.03   | 0     | 0      |
| <b>Ukraine</b>      |        |        |        |       |        |
| Cereals             | 81.31  | 314.77 | 136.24 | 420.7 | 153.08 |

|                                    |       |        |        |         |         |
|------------------------------------|-------|--------|--------|---------|---------|
| Fiber                              | 0     | 0      | 0      | 0       | 0       |
| Fruit                              | 0.14  | 0.54   | 0.24   | 0.78    | 0.3     |
| Livestock                          | 3.07  | 11.26  | 4.44   | 11.71   | 3.8     |
| Oil crops                          | 24.91 | 97.83  | 43.09  | 135.93  | 50.33   |
| Pulses                             | 1.24  | 5.88   | 3.36   | 11.87   | 4.42    |
| Roots & tubers                     | 7.28  | 31.81  | 16.11  | 44.4    | 13.56   |
| Sugar crops                        | 5.7   | 25.85  | 13.75  | 48.64   | 18.72   |
| Vegetables                         | 0.37  | 1.43   | 0.62   | 2.05    | 0.8     |
| <b>United Arab Emirates</b>        |       |        |        |         |         |
| Cereals                            | 0     | 0      | 0      | 0       | 0       |
| Fiber                              | 0     | 0      | 0      | 0       | 0       |
| Fruit                              | 0.75  | 3.49   | 1.29   | 0.63    | 0.11    |
| Livestock                          | 0.06  | 0.28   | 0.1    | 0.05    | 0.01    |
| Oil crops                          | 0     | 0      | 0      | 0       | 0       |
| Pulses                             | 0     | 0      | 0      | 0       | 0       |
| Roots & tubers                     | 0     | 0.02   | 0.01   | 0       | 0       |
| Sugar crops                        | 0     | 0      | 0      | 0       | 0       |
| Vegetables                         | 0.03  | 0.15   | 0.06   | 0.03    | 0       |
| <b>United Kingdom</b>              |       |        |        |         |         |
| Cereals                            | 36.01 | 177.58 | 101.9  | 308.06  | 100.79  |
| Fiber                              | 0     | 0      | 0      | 0       | 0       |
| Fruit                              | 0.01  | 0.05   | 0.04   | 0.13    | 0.04    |
| Livestock                          | 2.83  | 14.92  | 8.54   | 18.9    | 4.24    |
| Oil crops                          | 16.08 | 78.16  | 44.42  | 129.52  | 40.6    |
| Pulses                             | 0.28  | 2.34   | 1.83   | 5.88    | 1.94    |
| Roots & tubers                     | 0.65  | 5.97   | 4.91   | 16.81   | 5.74    |
| Sugar crops                        | 0.81  | 7.61   | 6.32   | 23.47   | 8.65    |
| Vegetables                         | 0.02  | 0.17   | 0.13   | 0.42    | 0.14    |
| <b>United Republic of Tanzania</b> |       |        |        |         |         |
| Cereals                            | 35.6  | 92.19  | 12.1   | 0.06    | 0       |
| Fiber                              | 2.98  | 8.28   | 1.12   | 0.01    | 0       |
| Fruit                              | 1.86  | 5.02   | 0.67   | 0       | 0       |
| Livestock                          | 2.08  | 4.06   | 0.44   | 0       | 0       |
| Oil crops                          | 6.92  | 18.72  | 2.51   | 0.01    | 0       |
| Pulses                             | 14.43 | 27.55  | 2.95   | 0.01    | 0       |
| Roots & tubers                     | 5.26  | 15.3   | 2.12   | 0.01    | 0       |
| Sugar crops                        | 0.26  | 0.82   | 0.12   | 0       | 0       |
| Vegetables                         | 0.1   | 0.3    | 0.04   | 0       | 0       |
| <b>United States of America</b>    |       |        |        |         |         |
| Cereals                            | 0.82  | 441.18 | 955.52 | 4474.47 | 4478.85 |
| Fiber                              | 0.03  | 22.22  | 52.63  | 266.78  | 282.75  |
| Fruit                              | 0.01  | 2.87   | 4.97   | 15.28   | 10.14   |
| Livestock                          | 0.2   | 51.49  | 79.73  | 205.38  | 132.7   |
| Oil crops                          | 0.78  | 502.55 | 1160.2 | 5581.69 | 5636.5  |
| Pulses                             | 0.01  | 5.22   | 10.32  | 43.43   | 39.03   |
| Roots & tubers                     | 0.03  | 10.29  | 17.78  | 57.29   | 33.75   |

|                                           |       |        |       |       |        |
|-------------------------------------------|-------|--------|-------|-------|--------|
| Sugar crops                               | 0     | 5.19   | 14.18 | 84.91 | 101.51 |
| Vegetables                                | 0     | 2.17   | 4.35  | 17.22 | 14.09  |
| <b>Uruguay</b>                            |       |        |       |       |        |
| Cereals                                   | 0.08  | 1.84   | 2.89  | 10.82 | 38.53  |
| Fiber                                     | 0     | 0      | 0     | 0     | 0      |
| Fruit                                     | 0     | 0.02   | 0.04  | 0.14  | 0.44   |
| Livestock                                 | 0.01  | 0.24   | 0.4   | 1.7   | 8.2    |
| Oil crops                                 | 0.04  | 0.98   | 1.63  | 10.78 | 94.08  |
| Pulses                                    | 0     | 0.01   | 0.02  | 0.07  | 0.23   |
| Roots & tubers                            | 0     | 0.02   | 0.04  | 0.19  | 0.87   |
| Sugar crops                               | 0     | 0      | 0     | 0.01  | 0.1    |
| Vegetables                                | 0     | 0      | 0.01  | 0.03  | 0.13   |
| <b>Uzbekistan</b>                         |       |        |       |       |        |
| Cereals                                   | 16.44 | 98.06  | 38.08 | 35.19 | 38.82  |
| Fiber                                     | 14.42 | 86.05  | 33.41 | 30.87 | 34.05  |
| Fruit                                     | 0.23  | 1.38   | 0.54  | 0.5   | 0.55   |
| Livestock                                 | 0.99  | 6.65   | 2.66  | 1.94  | 1.49   |
| Oil crops                                 | 0.08  | 0.49   | 0.19  | 0.17  | 0.18   |
| Pulses                                    | 0.01  | 0.05   | 0.02  | 0.02  | 0.02   |
| Roots & tubers                            | 0.45  | 2.64   | 1.02  | 0.95  | 1.05   |
| Sugar crops                               | 0     | 0      | 0     | 0     | 0      |
| Vegetables                                | 0.35  | 2.1    | 0.81  | 0.75  | 0.83   |
| <b>Venezuela (Bolivarian Republic of)</b> |       |        |       |       |        |
| Cereals                                   | 0.43  | 7.1    | 7.44  | 16.03 | 55.53  |
| Fiber                                     | 0.01  | 0.1    | 0.11  | 0.25  | 0.87   |
| Fruit                                     | 0.01  | 0.14   | 0.18  | 0.57  | 2.41   |
| Livestock                                 | 0.16  | 2.48   | 2.3   | 3.27  | 7.51   |
| Oil crops                                 | 0.05  | 0.83   | 0.91  | 2.13  | 7.49   |
| Pulses                                    | 0.01  | 0.21   | 0.22  | 0.42  | 1.06   |
| Roots & tubers                            | 0.01  | 0.2    | 0.25  | 0.75  | 2.98   |
| Sugar crops                               | 0.02  | 0.36   | 0.4   | 0.94  | 3.18   |
| Vegetables                                | 0     | 0.07   | 0.08  | 0.19  | 0.65   |
| <b>Viet Nam</b>                           |       |        |       |       |        |
| Cereals                                   | 75.01 | 213.36 | 17.9  | 86.55 | 0      |
| Fiber                                     | 0.35  | 0.8    | 0.06  | 0.21  | 0      |
| Fruit                                     | 0.88  | 2.04   | 0.15  | 0.56  | 0      |
| Livestock                                 | 8.47  | 12.77  | 0.5   | 4.16  | 0      |
| Oil crops                                 | 14.9  | 36.05  | 2.78  | 5.67  | 0      |
| Pulses                                    | 2.98  | 6.43   | 0.45  | 0.59  | 0      |
| Roots & tubers                            | 8.09  | 14.89  | 0.84  | 1.86  | 0      |
| Sugar crops                               | 1.55  | 4.53   | 0.38  | 1.7   | 0      |
| Vegetables                                | 0.12  | 0.29   | 0.02  | 0.06  | 0      |
| <b>Yemen</b>                              |       |        |       |       |        |
| Cereals                                   | 3.57  | 15.07  | 4.91  | 2.52  | 0.43   |
| Fiber                                     | 0.17  | 0.68   | 0.21  | 0.11  | 0.02   |

|                 |      |       |      |      |      |
|-----------------|------|-------|------|------|------|
| Fruit           | 0.11 | 0.59  | 0.21 | 0.11 | 0.02 |
| Livestock       | 0.93 | 2.27  | 0.42 | 0.19 | 0.03 |
| Oil crops       | 0.5  | 1.8   | 0.52 | 0.26 | 0.04 |
| Pulses          | 0.06 | 0.22  | 0.07 | 0.03 | 0.01 |
| Roots & tubers  | 0.18 | 0.77  | 0.25 | 0.13 | 0.02 |
| Sugar crops     | 0    | 0     | 0    | 0    | 0    |
| Vegetables      | 0.09 | 0.49  | 0.18 | 0.09 | 0.02 |
| <b>Zambia</b>   |      |       |      |      |      |
| Cereals         | 8.38 | 21.25 | 2.79 | 5.82 | 0    |
| Fiber           | 0.88 | 2.39  | 0.33 | 3.61 | 0    |
| Fruit           | 0    | 0     | 0    | 0    | 0    |
| Livestock       | 0.57 | 1.04  | 0.11 | 0.29 | 0    |
| Oil crops       | 2.04 | 6.93  | 1.02 | 0.91 | 0    |
| Pulses          | 0.07 | 0.12  | 0.01 | 0.03 | 0    |
| Roots & tubers  | 1.08 | 1.55  | 0.12 | 0.09 | 0    |
| Sugar crops     | 0.38 | 0.62  | 0.06 | 0.14 | 0    |
| Vegetables      | 0.04 | 0.06  | 0.01 | 0.01 | 0    |
| <b>Zimbabwe</b> |      |       |      |      |      |
| Cereals         | 6.11 | 30.09 | 4.88 | 1.49 | 0    |
| Fiber           | 1.35 | 8.06  | 1.35 | 0.75 | 0    |
| Fruit           | 0.03 | 0.19  | 0.03 | 0    | 0    |
| Livestock       | 1.07 | 1.65  | 0.15 | 0.02 | 0    |
| Oil crops       | 3.57 | 8.15  | 1.02 | 0.44 | 0    |
| Pulses          | 0.3  | 1.11  | 0.17 | 0.03 | 0    |
| Roots & tubers  | 0.17 | 0.47  | 0.06 | 0.03 | 0    |
| Sugar crops     | 0.43 | 1.02  | 0.13 | 0.1  | 0    |
| Vegetables      | 0    | 0.04  | 0.01 | 0    | 0    |

**Protein production (T)**

|                    | < 2 ha    | 2 - 20 ha | 20 - 50 ha | 50 - 200 ha | > 200 ha |
|--------------------|-----------|-----------|------------|-------------|----------|
| <b>Afghanistan</b> |           |           |            |             |          |
| Cereals            | 136304.22 | 334841.34 | 43343.62   | 143436.68   | 0        |
| Fiber              | 275.09    | 8755.42   | 1554.79    | 283.57      | 0        |
| Fruit              | 280.42    | 1939.36   | 313.72     | 58.61       | 0        |
| Livestock          | 42288.16  | 54714.06  | 4998.91    | 883.21      | 0        |
| Oil crops          | 3048.64   | 3873.33   | 340.99     | 62.14       | 0        |
| Pulses             | 612.8     | 1289.36   | 156.74     | 316         | 0        |
| Roots & tubers     | 1172.52   | 2573.89   | 317.66     | 485.06      | 0        |
| Sugar crops        | 17.69     | 52.14     | 7.06       | 1.38        | 0        |
| Vegetables         | 0         | 0         | 0          | 0           | 0        |
| <b>Albania</b>     |           |           |            |             |          |
| Cereals            | 9208.11   | 28830.2   | 7216.63    | 7087.2      | 329.54   |
| Fiber              | 22.25     | 124.06    | 68.43      | 98.95       | 4.6      |
| Fruit              | 115.59    | 455.3     | 178.13     | 229.43      | 10.67    |
| Livestock          | 10560.98  | 31019.38  | 6359.35    | 5051.46     | 234.51   |
| Oil crops          | 130.36    | 380.56    | 76.32      | 58.86       | 2.74     |



|                  |          |           |           |            |           |
|------------------|----------|-----------|-----------|------------|-----------|
| Pulses           | 886.29   | 2594.63   | 525.68    | 411.04     | 19.16     |
| Roots & tubers   | 386.38   | 1280.38   | 369.1     | 403.73     | 18.78     |
| Sugar crops      | 94.2     | 294.46    | 73.39     | 71.81      | 3.34      |
| Vegetables       | 296.78   | 971.44    | 272.23    | 292.04     | 13.58     |
| <b>Algeria</b>   |          |           |           |            |           |
| Cereals          | 56434.72 | 210089.05 | 62302.27  | 71415.54   | 96844.93  |
| Fiber            | 1.71     | 7.94      | 2.69      | 2.44       | 2.61      |
| Fruit            | 1986.63  | 7873.92   | 2585.66   | 1438.03    | 617.76    |
| Livestock        | 20962.07 | 83286.52  | 25900.19  | 21002.16   | 20046.05  |
| Oil crops        | 1528.43  | 5047.39   | 1344.9    | 1779.33    | 2658.1    |
| Pulses           | 174.25   | 628.4     | 180.97    | 219.71     | 309.64    |
| Roots & tubers   | 4206.64  | 13569.68  | 3573.56   | 3614.29    | 4550.18   |
| Sugar crops      | 0        | 0         | 0         | 0          | 0         |
| Vegetables       | 1759.22  | 6986.41   | 2179.6    | 1554.63    | 1204.29   |
| <b>Angola</b>    |          |           |           |            |           |
| Cereals          | 17459.44 | 35009.58  | 3904.25   | 2350.17    | 0         |
| Fiber            | 304.29   | 707.01    | 87.9      | 94.57      | 0         |
| Fruit            | 2529.33  | 4807.82   | 518.62    | 374.7      | 0         |
| Livestock        | 10096.07 | 16180.35  | 1454      | 1502.81    | 0         |
| Oil crops        | 1097.33  | 1799.25   | 163.62    | 101.1      | 0         |
| Pulses           | 4934.91  | 11376.79  | 1398.07   | 1395.02    | 0         |
| Roots & tubers   | 31079.69 | 72562.9   | 9005.27   | 6531.3     | 0         |
| Sugar crops      | 0        | 0         | 0         | 0          | 0         |
| Vegetables       | 32.93    | 74.22     | 9.05      | 7.54       | 0         |
| <b>Argentina</b> |          |           |           |            |           |
| Cereals          | 1968.12  | 49781.45  | 80273.67  | 438317.12  | 3180646.1 |
| Fiber            | 426.26   | 7278.69   | 7905.82   | 21642.86   | 2         |
| Fruit            | 8.27     | 348.83    | 681.06    | 4007.8     | 116078.73 |
| Livestock        | 3669.56  | 62946.96  | 69194.06  | 170052.41  | 26035.76  |
| Oil crops        | 6005.35  | 166222.29 | 283053.66 | 1725815.09 | 657423.88 |
| Pulses           | 76.52    | 1838.59   | 2936.73   | 11663.88   | 13597447. |
| Roots & tubers   | 83.25    | 1728.1    | 2448.18   | 7895.48    | 42        |
| Sugar crops      | 0        | 0         | 0         | 0          | 47255.63  |
| Vegetables       | 7.98     | 213.7     | 352.3     | 1732.56    | 22503.62  |
| <b>Armenia</b>   |          |           |           |            |           |
| Cereals          | 3469.97  | 25532.9   | 10538.4   | 5562.26    | 959.28    |
| Fiber            | 0        | 0         | 0         | 0          | 0         |
| Fruit            | 128.84   | 954.93    | 394.39    | 208.44     | 35.93     |
| Livestock        | 3507.75  | 18346.41  | 6770.22   | 3492.74    | 601.44    |
| Oil crops        | 0        | 0         | 0         | 0          | 0         |
| Pulses           | 63.64    | 472.54    | 195.39    | 103.22     | 17.79     |
| Roots & tubers   | 639.27   | 4724.78   | 1950.2    | 1030.54    | 177.69    |
| Sugar crops      | 26.44    | 139.98    | 53.93     | 26.99      | 4.74      |
| Vegetables       | 200.98   | 1600.64   | 671.73    | 356.72     | 61.47     |
| <b>Australia</b> |          |           |           |            |           |

|                   |           |           |           |           |           |
|-------------------|-----------|-----------|-----------|-----------|-----------|
|                   |           |           |           |           | 3317842.8 |
| Cereals           | 0         | 6214.79   | 26684.08  | 248588.6  | 5         |
| Fiber             | 0         | 480.77    | 2187.49   | 21302.01  | 376669.46 |
| Fruit             | 0         | 27.4      | 130.25    | 1213.15   | 17429.88  |
| Livestock         | 0         | 2017.85   | 8085.67   | 73910.73  | 806407.04 |
| Oil crops         | 0         | 937.06    | 3981.29   | 35944.12  | 375317.57 |
| Pulses            | 0         | 88.01     | 417.32    | 4147.87   | 81727.13  |
| Roots & tubers    | 0         | 53.33     | 217.04    | 1937.17   | 17241.83  |
| Sugar crops       | 0         | 0         | 0         | 0         | 0         |
| Vegetables        | 0         | 12.46     | 53.32     | 479.9     | 4926.59   |
| <b>Austria</b>    |           |           |           |           |           |
| Cereals           | 42105.84  | 169759.36 | 77716.88  | 140332.8  | 16779.16  |
| Fiber             | 0         | 0         | 0         | 0         | 0         |
| Fruit             | 403.98    | 1449.52   | 535.07    | 840.49    | 89.85     |
| Livestock         | 10972.53  | 66006.73  | 44133.7   | 88615.98  | 10685.35  |
| Oil crops         | 8152.15   | 30894.7   | 12857.53  | 22317.16  | 2643.63   |
| Pulses            | 1778.28   | 7155.27   | 3267.68   | 5900.03   | 706.61    |
| Roots & tubers    | 1306.38   | 4611.64   | 1668.22   | 2653.33   | 297.46    |
| Sugar crops       | 4012.89   | 14414.07  | 5455.42   | 9071.95   | 1067.27   |
| Vegetables        | 123.8     | 498.44    | 227.7     | 410.69    | 49.07     |
| <b>Azerbaijan</b> |           |           |           |           |           |
| Cereals           | 39879.86  | 128191.85 | 34517.93  | 27423.78  | 27517     |
| Fiber             | 7179.83   | 23066.91  | 6204.69   | 4943.44   | 4975.43   |
| Fruit             | 166.19    | 532.17    | 142.78    | 112.74    | 112.36    |
| Livestock         | 10143.6   | 33664     | 9262.5    | 8328.66   | 9484.78   |
| Oil crops         | 264.82    | 853.4     | 230.44    | 182.96    | 183.34    |
| Pulses            | 385.25    | 2011.43   | 728.88    | 458.72    | 243.27    |
| Roots & tubers    | 2464.03   | 7839.67   | 2086.07   | 1670.15   | 1694.57   |
| Sugar crops       | 220.16    | 715.54    | 195.39    | 151.15    | 146.48    |
| Vegetables        | 883.26    | 2843.58   | 771.94    | 490.5     | 336.69    |
| <b>Bangladesh</b> |           |           |           |           |           |
| Cereals           | 773301.88 | 1706454.7 | 211183.13 | 400968.01 | 0         |
| Fiber             | 4304.14   | 9633.37   | 1208.96   | 1299.91   | 0         |
| Fruit             | 1812.46   | 4049.29   | 503.76    | 1130.84   | 0         |
| Livestock         | 66153     | 122805.18 | 13738.54  | 19952.04  | 0         |
| Oil crops         | 18733.41  | 55793.35  | 7748.47   | 12400.19  | 0         |
| Pulses            | 3956.25   | 9081.29   | 1142.2    | 2460.99   | 0         |
| Roots & tubers    | 19771.71  | 41381.8   | 4985.13   | 15063.46  | 0         |
| Sugar crops       | 0         | 0         | 0         | 0         | 0         |
| Vegetables        | 2165.32   | 4663.27   | 570.66    | 1076.21   | 0         |
| <b>Belarus</b>    |           |           |           |           |           |
| Cereals           | 50882.73  | 193159.62 | 80466.33  | 233181.19 | 81632.95  |
| Fiber             | 0         | 0         | 0         | 0         | 0         |
| Fruit             | 15.93     | 142.57    | 115.43    | 398.44    | 138.63    |
| Livestock         | 19534.79  | 81965.41  | 39285.19  | 121547.96 | 43308.7   |
| Oil crops         | 5077.94   | 19292.73  | 8071.72   | 23094.99  | 7942.45   |

|                                         |          |           |          |           |          |
|-----------------------------------------|----------|-----------|----------|-----------|----------|
| Pulses                                  | 2243.19  | 8549.55   | 3583.32  | 10232.08  | 3522.26  |
| Roots & tubers                          | 2343.18  | 21038.86  | 17066.81 | 63464.8   | 23639.7  |
| Sugar crops                             | 734.56   | 6875.58   | 5710.69  | 22243.58  | 8526.36  |
| Vegetables                              | 293.58   | 1151.25   | 497.99   | 1329.01   | 425.57   |
| <b>Belgium</b>                          |          |           |          |           |          |
| Cereals                                 | 21503.82 | 83090.99  | 36385.62 | 125827.05 | 49512.91 |
| Fiber                                   | 0        | 0         | 0        | 0         | 0        |
| Fruit                                   | 71.96    | 262.09    | 103.61   | 283.11    | 93.34    |
| Livestock                               | 32743.08 | 119412.32 | 45212.42 | 103129.33 | 29626.52 |
| Oil crops                               | 22.16    | 645.1     | 732.77   | 6836.67   | 3740.65  |
| Pulses                                  | 69.36    | 294       | 146.81   | 372.04    | 98.28    |
| Roots & tubers                          | 5692.86  | 19020.32  | 6029.75  | 10395.83  | 2106.93  |
| Sugar crops                             | 4374.44  | 18366.18  | 8950.17  | 29370.21  | 10827.19 |
| Vegetables                              | 211.76   | 786.46    | 317.77   | 836.76    | 265.77   |
| <b>Belize</b>                           |          |           |          |           |          |
| Cereals                                 | 80       | 720.55    | 1895.69  | 810.59    | 375.91   |
| Fiber                                   | 0        | 0         | 0        | 0         | 0        |
| Fruit                                   | 51.46    | 462.74    | 1216.4   | 518.53    | 237.02   |
| Livestock                               | 125.51   | 396.14    | 650.73   | 378.44    | 389.26   |
| Oil crops                               | 3.73     | 33.59     | 88.37    | 37.77     | 17.46    |
| Pulses                                  | 16.46    | 153.14    | 409.53   | 185.24    | 107.52   |
| Roots & tubers                          | 0.36     | 3.33      | 8.84     | 3.9       | 2.05     |
| Sugar crops                             | 0        | 0         | 0        | 0         | 0        |
| Vegetables                              | 0.12     | 1.08      | 2.84     | 1.23      | 0.6      |
| <b>Benin</b>                            |          |           |          |           |          |
| Cereals                                 | 25778.66 | 43849.53  | 4325.02  | 17.17     | 0        |
| Fiber                                   | 18303.49 | 58259.07  | 8338.38  | 45.87     | 0        |
| Fruit                                   | 183.51   | 312.89    | 30.41    | 0.12      | 0        |
| Livestock                               | 3310.38  | 5181.74   | 455.41   | 1.62      | 0        |
| Oil crops                               | 1999.3   | 3154.6    | 291.03   | 1         | 0        |
| Pulses                                  | 7525.66  | 12953.42  | 1288.2   | 5.23      | 0        |
| Roots & tubers                          | 25918.15 | 32450.72  | 2043.13  | 2.74      | 0        |
| Sugar crops                             | 0        | 0         | 0        | 0         | 0        |
| Vegetables                              | 434.83   | 710.8     | 67.35    | 0.25      | 0        |
| <b>Bhutan</b>                           |          |           |          |           |          |
| Cereals                                 | 5151.19  | 7466.78   | 692.07   | 141.72    | 0        |
| Fiber                                   | 0        | 0         | 0        | 0         | 0        |
| Fruit                                   | 120.33   | 173.87    | 16.1     | 3.29      | 0        |
| Livestock                               | 888.67   | 1295.1    | 120.27   | 24.71     | 0        |
| Oil crops                               | 204.76   | 304.1     | 28.44    | 5.92      | 0        |
| Pulses                                  | 599.53   | 740.63    | 64.23    | 11.4      | 0        |
| Roots & tubers                          | 360.25   | 496.15    | 45.09    | 8.87      | 0        |
| Sugar crops                             | 0        | 0         | 0        | 0         | 0        |
| Vegetables                              | 4.6      | 5.62      | 0.48     | 0.09      | 0        |
| <b>Bolivia (Plurinational State of)</b> |          |           |          |           |          |

|                               |          |           |           |            |           |
|-------------------------------|----------|-----------|-----------|------------|-----------|
| Cereals                       | 663.18   | 11080.1   | 11690.86  | 25727.8    | 90725.85  |
| Fiber                         | 100.71   | 1752.94   | 1952.61   | 5364.83    | 26042.03  |
| Fruit                         | 86.88    | 1330.62   | 1195.79   | 1402.61    | 1921.32   |
| Livestock                     | 628.93   | 10390.54  | 10837.36  | 20998.9    | 46474.42  |
| Oil crops                     | 482.36   | 11500.18  | 17774.97  | 82688.79   | 498488.98 |
| Pulses                        | 68.1     | 1077.66   | 1033.24   | 1667.55    | 4456.19   |
| Roots & tubers                | 215.62   | 3343.09   | 3087.74   | 3982.96    | 5022.09   |
| Sugar crops                   | 0        | 0         | 0         | 0          | 0         |
| Vegetables                    | 7.72     | 123.98    | 122.08    | 230.58     | 851.8     |
| <b>Bosnia and Herzegovina</b> |          |           |           |            |           |
| Cereals                       | 10534.47 | 40087.24  | 17208.71  | 31524.91   | 4033.42   |
| Fiber                         | 0        | 0         | 0         | 0          | 0         |
| Fruit                         | 23.56    | 99.88     | 50.51     | 99.4       | 13.09     |
| Livestock                     | 3235.86  | 12579.75  | 5442.39   | 9568.23    | 1129.36   |
| Oil crops                     | 404.74   | 1702.31   | 864       | 1737.47    | 236.33    |
| Pulses                        | 375.38   | 1433.98   | 613.49    | 1104.5     | 137.33    |
| Roots & tubers                | 659.29   | 2483.5    | 1048.57   | 1908.71    | 244.06    |
| Sugar crops                   | 0        | 0.04      | 0.04      | 0.11       | 0.02      |
| Vegetables                    | 65.63    | 251.37    | 108.1     | 195.32     | 24.36     |
| <b>Botswana</b>               |          |           |           |            |           |
| Cereals                       | 403.95   | 1873.71   | 300.51    | 940.88     | 0         |
| Fiber                         | 126.28   | 470.79    | 71.61     | 117.92     | 0         |
| Fruit                         | 0.18     | 3.96      | 0.74      | 0.2        | 0         |
| Livestock                     | 886.43   | 5361.97   | 897.44    | 3391.67    | 0         |
| Oil crops                     | 67.81    | 293.65    | 46.64     | 169.01     | 0         |
| Pulses                        | 47       | 209.07    | 33.27     | 173.18     | 0         |
| Roots & tubers                | 0        | 0         | 0         | 0          | 0         |
| Sugar crops                   | 0        | 0         | 0         | 0          | 0         |
| Vegetables                    | 0.38     | 2.86      | 0.5       | 0.75       | 0         |
| <b>Brazil</b>                 |          |           |           |            |           |
| Cereals                       | 9291.38  | 164651.56 | 189015.48 | 591017.89  | 3376316.9 |
| Fiber                         | 290.01   | 9570.34   | 17423.82  | 120110.7   | 1         |
| Fruit                         | 1482.25  | 23240.1   | 21814.27  | 34415.4    | 1012623.4 |
| Livestock                     | 19428.93 | 317067.75 | 322036.67 | 647390.43  | 1         |
| Oil crops                     | 5596.2   | 156799.35 | 268532.63 | 1917983.73 | 110374.53 |
| Pulses                        | 5900.74  | 91981.73  | 85543.38  | 123979.38  | 2262868.0 |
| Roots & tubers                | 3071.94  | 48728.86  | 46991.03  | 75888.21   | 7         |
| Sugar crops                   | 0        | 0         | 0         | 0          | 17375051. |
| Vegetables                    | 263.49   | 4241.92   | 4193.93   | 7638.58    | 67        |
| <b>Brunei Darussalam</b>      |          |           |           |            |           |
| Cereals                       | 0        | 53.81     | 7.36      | 3.48       | 0         |
| Fiber                         | 0        | 0         | 0         | 0          | 0         |
| Fruit                         | 0        | 9.72      | 1.33      | 0.63       | 0         |

|                     |           |           |          |           |          |
|---------------------|-----------|-----------|----------|-----------|----------|
| Livestock           | 0         | 2198.98   | 300.92   | 142.08    | 0        |
| Oil crops           | 0         | 4.96      | 0.68     | 0.32      | 0        |
| Pulses              | 0         | 0         | 0        | 0         | 0        |
| Roots & tubers      | 0         | 24.77     | 3.39     | 1.6       | 0        |
| Sugar crops         | 0         | 0         | 0        | 0         | 0        |
| Vegetables          | 0         | 0         | 0        | 0         | 0        |
| <b>Bulgaria</b>     |           |           |          |           |          |
| Cereals             | 20377.68  | 114899.84 | 74810.32 | 262586.31 | 95286.75 |
| Fiber               | 86        | 226.4     | 27.39    | 4.17      | 1.38     |
| Fruit               | 250.73    | 857.89    | 293.46   | 658.07    | 190      |
| Livestock           | 7884.92   | 30366.26  | 12704.62 | 30306.53  | 8601.91  |
| Oil crops           | 2177.01   | 17467.72  | 13919.64 | 60068.31  | 24726.84 |
| Pulses              | 113.53    | 495.03    | 255.24   | 828.01    | 294.59   |
| Roots & tubers      | 388.34    | 1686.83   | 912.67   | 2025.8    | 340.52   |
| Sugar crops         | 4.38      | 45.39     | 39.67    | 141.64    | 49.09    |
| Vegetables          | 87.86     | 361.97    | 173.14   | 574.09    | 213.59   |
| <b>Burkina Faso</b> |           |           |          |           |          |
| Cereals             | 91196.56  | 179676.8  | 19730.22 | 46793.06  | 0        |
| Fiber               | 52789.21  | 97837.29  | 10657.12 | 39682.34  | 0        |
| Fruit               | 1.14      | 2.32      | 0.26     | 0.7       | 0        |
| Livestock           | 17848.5   | 24499.36  | 1835.02  | 3714.79   | 0        |
| Oil crops           | 1020.14   | 2672.24   | 352.6    | 2114.78   | 0        |
| Pulses              | 515.72    | 750.4     | 59.54    | 159.87    | 0        |
| Roots & tubers      | 242.52    | 534.29    | 63.43    | 299.89    | 0        |
| Sugar crops         | 0         | 0         | 0        | 0         | 0        |
| Vegetables          | 21.54     | 46.15     | 5.4      | 12.34     | 0        |
| <b>Burundi</b>      |           |           |          |           |          |
| Cereals             | 10874.98  | 13096.95  | 667.58   | 0.3       | 0        |
| Fiber               | 720.37    | 867.92    | 44.78    | 0.03      | 0        |
| Fruit               | 5059.52   | 6096.11   | 314.75   | 0.23      | 0        |
| Livestock           | 2082.82   | 2509.87   | 130.07   | 0.08      | 0        |
| Oil crops           | 440.69    | 530.28    | 26.4     | 0.01      | 0        |
| Pulses              | 21241.03  | 25586.33  | 1311.86  | 0.96      | 0        |
| Roots & tubers      | 7515.12   | 9053.36   | 465.42   | 0.34      | 0        |
| Sugar crops         | 0         | 0         | 0        | 0         | 0        |
| Vegetables          | 0         | 0         | 0        | 0         | 0        |
| <b>Cambodia</b>     |           |           |          |           |          |
| Cereals             | 133217.47 | 311320.37 | 21563.36 | 8845.82   | 0        |
| Fiber               | 28.32     | 52.82     | 2.65     | 0.95      | 0        |
| Fruit               | 444.23    | 888.36    | 53.3     | 20.99     | 0        |
| Livestock           | 10869.92  | 19096.11  | 870.41   | 298.1     | 0        |
| Oil crops           | 21009.85  | 35015.92  | 1777.59  | 675.05    | 0        |
| Pulses              | 3662.79   | 6153.49   | 294.91   | 107.3     | 0        |
| Roots & tubers      | 6614.18   | 11777.06  | 619.44   | 234.02    | 0        |
| Sugar crops         | 0         | 0         | 0        | 0         | 0        |
| Vegetables          | 0         | 0         | 0        | 0         | 0        |

|                                 |          |           |           |            |           |
|---------------------------------|----------|-----------|-----------|------------|-----------|
| <b>Cameroon</b>                 |          |           |           |            |           |
| Cereals                         | 64076.56 | 98104.35  | 8420.84   | 6139.05    | 0         |
| Fiber                           | 32869.04 | 54632.08  | 5195.27   | 1813.67    | 0         |
| Fruit                           | 8806.02  | 13770.35  | 1205.72   | 1702.67    | 0         |
| Livestock                       | 16831.29 | 20604.73  | 1356.44   | 1.53       | 0         |
| Oil crops                       | 1526.76  | 2439.31   | 221.93    | 89.31      | 0         |
| Pulses                          | 20893.26 | 25357.45  | 1441.38   | 4.41       | 0         |
| Roots & tubers                  | 10960.86 | 19334.55  | 1927.62   | 6851.21    | 0         |
| Sugar crops                     | 0        | 0         | 0         | 0          | 0         |
| Vegetables                      | 1931.14  | 2829.34   | 225.72    | 100.66     | 0         |
| <b>Canada</b>                   |          |           |           |            | 2416195.8 |
| Cereals                         | 2040.12  | 468145.54 | 734106.03 | 2285159.85 | 1         |
| Fiber                           | 0        | 0         | 0         | 0          | 0         |
| Fruit                           | 0.23     | 106.24    | 209.05    | 689.2      | 391.21    |
| Livestock                       | 343.84   | 88503.97  | 147234.92 | 374718.62  | 242779.39 |
|                                 |          |           |           |            | 1737647.2 |
| Oil crops                       | 1844.47  | 415838.51 | 636889.77 | 1770723.68 | 4         |
| Pulses                          | 259.97   | 58188.68  | 89626.08  | 278524.05  | 306189.39 |
| Roots & tubers                  | 36.67    | 8630.26   | 14129.25  | 31489.53   | 19062.72  |
| Sugar crops                     | 1.11     | 259.26    | 412.69    | 3181.87    | 5404.29   |
| Vegetables                      | 1.93     | 680.62    | 1385.71   | 4118.12    | 2414.09   |
| <b>Central African Republic</b> |          |           |           |            |           |
| Cereals                         | 7125.98  | 9733.36   | 694.8     | 1.72       | 0         |
| Fiber                           | 424.15   | 511.9     | 27.63     | 0.02       | 0         |
| Fruit                           | 609.62   | 1003.99   | 94.89     | 0.37       | 0         |
| Oil crops                       | 2999.35  | 4049.15   | 289.05    | 0.66       | 0         |
| Pulses                          | 531.94   | 995.91    | 106.35    | 0.46       | 0         |
| Roots & tubers                  | 4872.46  | 6276.8    | 410.55    | 0.72       | 0         |
| Sugar crops                     | 0        | 0         | 0         | 0          | 0         |
| Vegetables                      | 0        | 0         | 0         | 0          | 0         |
| <b>Chad</b>                     |          |           |           |            |           |
| Cereals                         | 53767.2  | 96502.62  | 9938.8    | 42728.73   | 0         |
| Fiber                           | 14165.81 | 26540.09  | 2836.62   | 4552.64    | 0         |
| Fruit                           | 55.69    | 114.28    | 13.11     | 76.44      | 0         |
| Livestock                       | 9398.55  | 14090.77  | 1228.44   | 2523.49    | 0         |
| Oil crops                       | 2104.9   | 3344.39   | 305.73    | 748.35     | 0         |
| Pulses                          | 5342.1   | 9394.66   | 943.9     | 3014.53    | 0         |
| Roots & tubers                  | 2311.18  | 4442.95   | 484.12    | 1305.36    | 0         |
| Sugar crops                     | 0        | 0         | 0         | 0          | 0         |
| Vegetables                      | 71.67    | 113.89    | 10.23     | 45.23      | 0         |
| <b>Chile</b>                    |          |           |           |            |           |
| Cereals                         | 2040.79  | 33393.77  | 34208.58  | 69105.02   | 230225.94 |
| Fiber                           | 0        | 0         | 0         | 0          | 0         |
| Fruit                           | 113.3    | 1834.54   | 1840.08   | 3587.5     | 12683.33  |
| Livestock                       | 1482.91  | 24387.53  | 25012.65  | 49488.08   | 145277.08 |

|                   |            |             |          |            |           |
|-------------------|------------|-------------|----------|------------|-----------|
| Oil crops         | 94.59      | 1535.46     | 1544.37  | 3024.22    | 10602.4   |
| Pulses            | 58.75      | 919.67      | 864.64   | 1370.93    | 4525.03   |
| Roots & tubers    | 65.55      | 1119.19     | 1230.95  | 3009.05    | 11553.92  |
| Sugar crops       | 149.64     | 2429.07     | 2443.15  | 4784.24    | 16772.76  |
| Vegetables        | 70.44      | 1143.46     | 1150.09  | 2252.03    | 7895.71   |
| <b>China</b>      |            |             |          |            |           |
| Cereals           | 21668836   | 10935904.42 | 0        | 5143209.55 | 0         |
| Fiber             | 2884677.93 | 2078222.21  | 0        | 1582475.46 | 0         |
| Fruit             | 108048.96  | 57863.04    | 0        | 20630.57   | 0         |
| Livestock         | 7800906.65 | 3138761.29  | 0        | 1350324.91 | 0         |
| Oil crops         | 5024969.63 | 3102444.34  | 0        | 1799576.71 | 0         |
| Pulses            | 316214.73  | 153704.69   | 0        | 108923.45  | 0         |
| Roots & tubers    | 1424664.58 | 422933.48   | 0        | 138322.31  | 0         |
| Sugar crops       | 29767.61   | 41202.31    | 0        | 29527.42   | 0         |
| Vegetables        | 277725.35  | 130070.62   | 0        | 55187.65   | 0         |
| <b>Colombia</b>   |            |             |          |            |           |
| Cereals           | 565.01     | 11493.54    | 15803.5  | 52762.45   | 195118.32 |
| Fiber             | 324.27     | 5158.77     | 5008.18  | 8338.73    | 21653.65  |
| Fruit             | 201.66     | 3444.17     | 3779.61  | 8674.38    | 26478.69  |
| Livestock         | 3730.66    | 59779.79    | 58709.45 | 101673.7   | 272793.81 |
| Oil crops         | 94.78      | 1528.1      | 1513.98  | 3270.84    | 16676.91  |
| Pulses            | 229.35     | 3890.59     | 4229.68  | 8985.75    | 20372.16  |
| Roots & tubers    | 461.99     | 7417.36     | 7328.29  | 12588.52   | 29847.81  |
| Sugar crops       | 0.01       | 1.32        | 2.98     | 18.91      | 121.52    |
| Vegetables        | 56.33      | 898.2       | 874.91   | 1469.52    | 3796.3    |
| <b>Congo</b>      |            |             |          |            |           |
| Cereals           | 646.98     | 926.11      | 77.48    | 7.39       | 0         |
| Fiber             | 0          | 0           | 0        | 0          | 0         |
| Fruit             | 273.52     | 706.23      | 92.29    | 77.93      | 0         |
| Livestock         | 500.43     | 930.15      | 96.08    | 320.93     | 0         |
| Oil crops         | 36.31      | 60.17       | 5.66     | 8.79       | 0         |
| Pulses            | 652.31     | 1096.41     | 104.44   | 174.8      | 0         |
| Roots & tubers    | 4029.85    | 7463.83     | 772.34   | 291.72     | 0         |
| Sugar crops       | 0          | 0           | 0        | 0          | 0         |
| Vegetables        | 11.49      | 17.91       | 1.6      | 2.16       | 0         |
| <b>Costa Rica</b> |            |             |          |            |           |
| Cereals           | 17.54      | 987.37      | 3733.61  | 3508.95    | 5949.01   |
| Fiber             | 0.28       | 15.74       | 59.54    | 55.92      | 94.69     |
| Fruit             | 28.69      | 1623.62     | 6141.33  | 5768.17    | 9766.61   |
| Livestock         | 168.17     | 3522.01     | 12014.24 | 13420.62   | 29508.55  |
| Oil crops         | 0.73       | 33.41       | 124.62   | 115.32     | 193.92    |
| Pulses            | 1.67       | 128.82      | 494.82   | 471.73     | 803.58    |
| Roots & tubers    | 2.18       | 170.66      | 655.8    | 614.8      | 1023.38   |
| Sugar crops       | 0          | 0           | 0        | 0          | 0         |
| Vegetables        | 0.68       | 52.56       | 201.92   | 192.5      | 327.91    |
| <b>Croatia</b>    |            |             |          |            |           |

|                                         |          |           |           |           |          |
|-----------------------------------------|----------|-----------|-----------|-----------|----------|
| Cereals                                 | 22049.08 | 79770.96  | 31172.75  | 88838.77  | 30751.95 |
| Fiber                                   | 0        | 0         | 0         | 0         | 0        |
| Fruit                                   | 156.78   | 527.45    | 175.16    | 450.86    | 154.71   |
| Livestock                               | 4189.83  | 15738.91  | 6533.72   | 22340.93  | 8906.7   |
| Oil crops                               | 6401.82  | 22287.22  | 8099.65   | 22565.03  | 7866.6   |
| Pulses                                  | 84.05    | 308.02    | 123.47    | 352.44    | 120.62   |
| Roots & tubers                          | 419.05   | 1451.27   | 516.77    | 1395.29   | 481.04   |
| Sugar crops                             | 1626.76  | 5844.07   | 2256.58   | 6502.03   | 2283.79  |
| Vegetables                              | 46.15    | 167.2     | 65.32     | 186.57    | 64.95    |
| <b>Cuba</b>                             |          |           |           |           |          |
| Cereals                                 | 5440.35  | 12306.55  | 11747     | 8545.37   | 13343.96 |
| Fiber                                   | 0        | 0         | 0         | 0         | 0        |
| Fruit                                   | 912.02   | 2079.52   | 2027.56   | 1619.63   | 2872.22  |
| Livestock                               | 2393.36  | 7784.89   | 13328.47  | 10610.99  | 18876.01 |
| Oil crops                               | 209.19   | 473.22    | 451.7     | 328.59    | 513.11   |
| Pulses                                  | 1859.47  | 4206.29   | 4015.04   | 2920.75   | 4560.87  |
| Roots & tubers                          | 1699.47  | 3839.3    | 3653.21   | 2661.51   | 4162.97  |
| Sugar crops                             | 0        | 0         | 0         | 0         | 0        |
| Vegetables                              | 705.13   | 1595.06   | 1522.54   | 1107.57   | 1729.52  |
| <b>Cyprus</b>                           |          |           |           |           |          |
| Cereals                                 | 0        | 0         | 0         | 0         | 0        |
| Fiber                                   | 0        | 0         | 0         | 0         | 0        |
| Fruit                                   | 5.92     | 27.39     | 10.16     | 4.93      | 0.87     |
| Livestock                               | 2189.15  | 10126.7   | 3756.18   | 1822.07   | 322.99   |
| Oil crops                               | 0.02     | 0.1       | 0.04      | 0.02      | 0        |
| Pulses                                  | 0.43     | 1.98      | 0.74      | 0.36      | 0.06     |
| Roots & tubers                          | 0        | 0         | 0         | 0         | 0        |
| Sugar crops                             | 0        | 0         | 0         | 0         | 0        |
| Vegetables                              | 0        | 0         | 0         | 0         | 0        |
| <b>Czech Republic</b>                   |          |           |           |           |          |
| Cereals                                 | 67878.02 | 252962.56 | 106325.99 | 323369.5  | 113612.7 |
| Fiber                                   | 0        | 0         | 0         | 0         | 0        |
| Fruit                                   | 78.28    | 300.55    | 125.55    | 251.08    | 51.03    |
| Livestock                               | 8677.02  | 43347.02  | 25879.46  | 83082.59  | 27907.72 |
| Oil crops                               | 24780.01 | 94897.46  | 41926.67  | 132593.11 | 47298.57 |
| Pulses                                  | 1658.84  | 5798.33   | 2138.18   | 5585.11   | 1789.84  |
| Roots & tubers                          | 599.22   | 2999.78   | 1894.59   | 5651.24   | 1609.9   |
| Sugar crops                             | 3774.59  | 12898.39  | 4486.14   | 13224.25  | 4972.57  |
| Vegetables                              | 70.86    | 247.84    | 91.46     | 238.09    | 76       |
| <b>Democratic Republic of the Congo</b> |          |           |           |           |          |
| Cereals                                 | 30684.36 | 51965.23  | 5026.1    | 13124.41  | 0        |
| Fiber                                   | 2878.71  | 5366.82   | 569.87    | 1559.08   | 0        |
| Fruit                                   | 4417.48  | 7050.67   | 623.86    | 2045.96   | 0        |
| Livestock                               | 3160.76  | 6226.95   | 670.56    | 528.79    | 0        |
| Oil crops                               | 2164.59  | 3579.27   | 331.34    | 471.15    | 0        |



|                 |           |            |           |           |           |
|-----------------|-----------|------------|-----------|-----------|-----------|
| Pulses          | 7035.81   | 11508.65   | 1049.27   | 2699      | 0         |
| Roots & tubers  | 49262.62  | 92464.99   | 9769.61   | 24921.52  | 0         |
| Sugar crops     | 0         | 0          | 0         | 0         | 0         |
| Vegetables      | 253.6     | 464.46     | 48.53     | 150.21    | 0         |
| <b>Denmark</b>  |           |            |           |           |           |
| Cereals         | 25262.9   | 210142.78  | 162611.46 | 547209.48 | 190188.97 |
| Fiber           | 0         | 0          | 0         | 0         | 0         |
| Fruit           | 1.68      | 14.24      | 11.16     | 37.37     | 12.84     |
| Livestock       | 9981.67   | 80999.91   | 61674.18  | 197864.17 | 66069.45  |
| Oil crops       | 3715.44   | 30887.82   | 23897.07  | 79955.88  | 27634.11  |
| Pulses          | 156.47    | 1303.84    | 1010.44   | 3407.24   | 1185.69   |
| Roots & tubers  | 509.04    | 4250.71    | 3297.84   | 11119.45  | 3866.56   |
| Sugar crops     | 674.75    | 5614.04    | 4345.13   | 14599.42  | 5065.64   |
| Vegetables      | 15.07     | 125.69     | 97.45     | 328.53    | 114.28    |
| <b>Djibouti</b> |           |            |           |           |           |
| Cereals         | 0         | 0          | 0         | 0         | 0         |
| Fiber           | 0         | 0          | 0         | 0         | 0         |
| Fruit           | 0         | 0          | 0         | 0         | 0         |
| Livestock       | 0         | 0          | 0         | 0         | 0         |
| Oil crops       | 0         | 0          | 0         | 0         | 0         |
| Pulses          | 0         | 0          | 0         | 0         | 0         |
| Roots & tubers  | 0         | 0          | 0         | 0         | 0         |
| Sugar crops     | 0         | 0          | 0         | 0         | 0         |
| Vegetables      | 0         | 0          | 0         | 0         | 0         |
| <b>Dominica</b> |           |            |           |           |           |
| Cereals         | 0.12      | 1.54       | 4.65      | 2.9       | 3.29      |
| Fiber           | 0         | 0          | 0         | 0         | 0         |
| Fruit           | 2.46      | 32.07      | 97.96     | 62.67     | 73.4      |
| Livestock       | 4.65      | 52.5       | 152.63    | 87.45     | 87.9      |
| Oil crops       | 1.53      | 20.02      | 61.3      | 39.38     | 46.36     |
| Pulses          | 0         | 0          | 0         | 0         | 0         |
| Roots & tubers  | 1.57      | 19.17      | 57.37     | 35.15     | 38.95     |
| Sugar crops     | 0         | 0          | 0         | 0         | 0         |
| Vegetables      | 0.02      | 0.23       | 0.7       | 0.45      | 0.53      |
| <b>Ecuador</b>  |           |            |           |           |           |
| Cereals         | 1906.38   | 29879.84   | 28150.5   | 40110.73  | 68728.41  |
| Fiber           | 8.66      | 142.47     | 147.41    | 276.85    | 560.7     |
| Fruit           | 714.96    | 10882.03   | 9635.76   | 10764.17  | 16531.69  |
| Livestock       | 2217.96   | 35147.01   | 33701.32  | 53394.57  | 126391.44 |
| Oil crops       | 29.12     | 658.6      | 1007.24   | 3614.51   | 11793.91  |
| Pulses          | 42.71     | 669        | 629.3     | 896.09    | 1570.65   |
| Roots & tubers  | 33.99     | 585.59     | 651.98    | 1454.58   | 3376.78   |
| Sugar crops     | 0.4       | 6.44       | 6.29      | 10.27     | 21        |
| Vegetables      | 7.66      | 117.84     | 107       | 131.02    | 181.52    |
| <b>Egypt</b>    |           |            |           |           |           |
| Cereals         | 239498.86 | 1107888.98 | 410936.75 | 199339.9  | 35335.9   |

|                          |          |           |          |          |          |
|--------------------------|----------|-----------|----------|----------|----------|
| Fiber                    | 23106.41 | 106887.09 | 39646.42 | 19231.95 | 3409.14  |
| Fruit                    | 6332.16  | 29291.7   | 10864.84 | 5270.39  | 934.25   |
| Livestock                | 47170.43 | 218203.96 | 80935.93 | 39260.93 | 6959.57  |
| Oil crops                | 3125.33  | 14457.36  | 5362.51  | 2601.28  | 461.11   |
| Pulses                   | 1323.17  | 6120.82   | 2270.33  | 1101.31  | 195.22   |
| Roots & tubers           | 5483.22  | 25364.63  | 9408.22  | 4563.8   | 809      |
| Sugar crops              | 6352.64  | 29386.44  | 10899.98 | 5287.43  | 937.27   |
| Vegetables               | 9509.77  | 43990.9   | 16317.05 | 7915.18  | 1403.08  |
| <b>El Salvador</b>       |          |           |          |          |          |
| Cereals                  | 8138.38  | 20022.75  | 21497.95 | 9075.12  | 3958.38  |
| Fiber                    | 79.01    | 176.82    | 152.38   | 64.32    | 28.06    |
| Fruit                    | 180.53   | 403.47    | 346.4    | 146.23   | 63.78    |
| Livestock                | 5066.19  | 12434.11  | 13287.84 | 5609.26  | 2446.71  |
| Oil crops                | 508.41   | 1093.67   | 838.83   | 354.09   | 154.45   |
| Pulses                   | 746.36   | 3266.42   | 6561.23  | 2769.77  | 1208.08  |
| Roots & tubers           | 55.41    | 114.34    | 75.85    | 32.02    | 13.97    |
| Sugar crops              | 0        | 0         | 0        | 0        | 0        |
| Vegetables               | 53.05    | 110.59    | 76.22    | 32.18    | 14.03    |
| <b>Equatorial Guinea</b> |          |           |          |          |          |
| Cereals                  | 0        | 0         | 0        | 0        | 0        |
| Fiber                    | 0        | 0         | 0        | 0        | 0        |
| Fruit                    | 215.15   | 258.8     | 12.74    | 0        | 0        |
| Livestock                | 52.67    | 63.35     | 3.12     | 0        | 0        |
| Oil crops                | 51.15    | 61.53     | 3.03     | 0        | 0        |
| Pulses                   | 0        | 0         | 0        | 0        | 0        |
| Roots & tubers           | 640.79   | 770.77    | 37.93    | 0.01     | 0        |
| Sugar crops              | 0        | 0         | 0        | 0        | 0        |
| Vegetables               | 0        | 0         | 0        | 0        | 0        |
| <b>Eritrea</b>           |          |           |          |          |          |
| Cereals                  | 13118.02 | 26890.25  | 3021.93  | 14.34    | 0        |
| Fiber                    | 0        | 0         | 0        | 0        | 0        |
| Fruit                    | 0        | 0         | 0        | 0        | 0        |
| Livestock                | 3160.94  | 5501.7    | 545.32   | 2.26     | 0        |
| Oil crops                | 544.57   | 1347.31   | 171.9    | 0.89     | 0        |
| Pulses                   | 444.54   | 1107.1    | 141.75   | 0.73     | 0        |
| Roots & tubers           | 40.63    | 100.45    | 12.81    | 0.07     | 0        |
| Sugar crops              | 0        | 0         | 0        | 0        | 0        |
| Vegetables               | 0        | 0         | 0        | 0        | 0        |
| <b>Estonia</b>           |          |           |          |          |          |
| Cereals                  | 1248.26  | 11434.69  | 9382.13  | 51047.92 | 24152.21 |
| Fiber                    | 0        | 0         | 0        | 0        | 0        |
| Fruit                    | 0.16     | 1.5       | 1.25     | 7.27     | 3.53     |
| Livestock                | 264.68   | 3875.98   | 3850     | 17283.62 | 6954.37  |
| Oil crops                | 433.15   | 4047.83   | 3358.17  | 19399.97 | 9406.09  |
| Pulses                   | 19.85    | 184.29    | 152.39   | 868.2    | 418.69   |
| Roots & tubers           | 34.48    | 318.16    | 262.16   | 1475.45  | 708.27   |

|                 |           |            |           |            |           |
|-----------------|-----------|------------|-----------|------------|-----------|
| Sugar crops     | 0         | 0          | 0         | 0          | 0         |
| Vegetables      | 0.82      | 7.62       | 6.32      | 36.03      | 17.36     |
| <b>Ethiopia</b> |           |            |           |            |           |
| Cereals         | 412045.12 | 762840.5   | 79738.44  | 76391.24   | 0         |
| Fiber           | 8044.84   | 15167.68   | 1607.7    | 2718.33    | 0         |
| Fruit           | 586.33    | 1104.1     | 116.89    | 197.46     | 0         |
| Livestock       | 58365.63  | 95398.06   | 8867.76   | 2186.69    | 0         |
| Oil crops       | 12405.15  | 19931.03   | 1787.17   | 2472.55    | 0         |
| Pulses          | 30834.41  | 46385.04   | 3831.09   | 4568.05    | 0         |
| Roots & tubers  | 4453.53   | 8373.27    | 885.66    | 1493.2     | 0         |
| Sugar crops     | 0         | 0          | 0         | 0          | 0         |
| Vegetables      | 643.66    | 1213.37    | 128.59    | 217.4      | 0         |
| <b>Finland</b>  |           |            |           |            |           |
| Cereals         | 16142.13  | 126732.21  | 98555.95  | 251291.51  | 56308.87  |
| Fiber           | 0         | 0          | 0         | 0          | 0         |
| Fruit           | 0.23      | 1.82       | 1.44      | 3.73       | 0.84      |
| Livestock       | 5847.15   | 35915.71   | 24379.49  | 56492.41   | 10998     |
| Oil crops       | 1332.68   | 10351.86   | 7998.33   | 20394.56   | 4597.6    |
| Pulses          | 65.37     | 507.78     | 392.33    | 1000.39    | 225.52    |
| Roots & tubers  | 289.71    | 2301.75    | 1804.66   | 4708.48    | 1096.3    |
| Sugar crops     | 345.94    | 2687.14    | 2076.21   | 5294.02    | 1193.45   |
| Vegetables      | 15.18     | 118.11     | 91.36     | 232.97     | 52.47     |
| <b>France</b>   |           |            |           |            |           |
| Cereals         | 239948.47 | 1275586.31 | 818191.69 | 3344512.79 | 1348526.6 |
| Fiber           | 0         | 0          | 0         | 0          | 0         |
| Fruit           | 2816.57   | 14672.38   | 8328.26   | 19504.52   | 4866.38   |
| Livestock       | 119185.15 | 506313.35  | 254627.42 | 589741.62  | 130139.36 |
| Oil crops       | 60121.57  | 296648.04  | 181377.79 | 889052.79  | 400953.58 |
| Pulses          | 12980.36  | 58008.15   | 30991.6   | 99289.06   | 34307.08  |
| Roots & tubers  | 1001.32   | 13440.48   | 13370.26  | 54142.5    | 19806.59  |
| Sugar crops     | 1908.43   | 32521.22   | 34830.81  | 217159.98  | 103055.28 |
| Vegetables      | 429.69    | 1929.09    | 1032.39   | 3274.07    | 1122.69   |
| <b>Gabon</b>    |           |            |           |            |           |
| Cereals         | 897.26    | 1180.95    | 85.15     | 0.17       | 0         |
| Fiber           | 0         | 0          | 0         | 0          | 0         |
| Fruit           | 969.08    | 1326.69    | 103.54    | 0.26       | 0         |
| Livestock       | 389.32    | 1001       | 131.09    | 0.67       | 0         |
| Oil crops       | 322.74    | 419.77     | 30.41     | 0.05       | 0         |
| Pulses          | 7.71      | 10.28      | 0.77      | 0          | 0         |
| Roots & tubers  | 2042.87   | 2738.29    | 208.54    | 0.43       | 0         |
| Sugar crops     | 0         | 0          | 0         | 0          | 0         |
| Vegetables      | 1.03      | 1.9        | 0.2       | 0          | 0         |
| <b>Gambia</b>   |           |            |           |            |           |
| Cereals         | 6100.08   | 11390.38   | 1215.83   | 5.3        | 0         |
| Fiber           | 61.54     | 96.68      | 8.39      | 0.03       | 0         |
| Fruit           | 0         | 0          | 0         | 0          | 0         |

|                |           |           |           |            |           |
|----------------|-----------|-----------|-----------|------------|-----------|
| Livestock      | 375.51    | 866.13    | 106.79    | 0.53       | 0         |
| Oil crops      | 164.15    | 273.1     | 26.3      | 0.1        | 0         |
| Pulses         | 75.21     | 120.3     | 11.16     | 0.04       | 0         |
| Roots & tubers | 40.48     | 58.76     | 4.71      | 0.01       | 0         |
| Sugar crops    | 0         | 0         | 0         | 0          | 0         |
| Vegetables     | 0         | 0         | 0         | 0          | 0         |
| <b>Georgia</b> |           |           |           |            |           |
| Cereals        | 4345.64   | 22830.11  | 8449.54   | 4356.59    | 750.72    |
| Fiber          | 0         | 0         | 0         | 0          | 0         |
| Fruit          | 144.06    | 933.41    | 377.15    | 195.28     | 33.91     |
| Livestock      | 4316.73   | 20941.25  | 7421.05   | 3825.76    | 656.35    |
| Oil crops      | 426.05    | 2238.42   | 828.01    | 427.13     | 73.58     |
| Pulses         | 286.27    | 1492.07   | 550.67    | 283.61     | 48.87     |
| Roots & tubers | 434.63    | 2346.86   | 878.44    | 453.87     | 78.22     |
| Sugar crops    | 0         | 0         | 0         | 0          | 0         |
| Vegetables     | 113.33    | 602.55    | 224.38    | 115.69     | 19.96     |
| <b>Germany</b> |           |           |           |            |           |
| Cereals        | 208444.98 | 1094200.4 | 666671.47 | 2305263.91 | 845170.25 |
| Fiber          | 0         | 0         | 0         | 0          | 0         |
| Fruit          | 1795.85   | 5578.01   | 1442.13   | 2290.92    | 549.2     |
| Livestock      | 70287.59  | 376492.23 | 232095.93 | 863052.69  | 336582.14 |
| Oil crops      | 67308.35  | 356900.27 | 223942.74 | 903135.64  | 366547.34 |
| Pulses         | 3425.94   | 15485.65  | 8196.8    | 27568.23   | 10195.09  |
| Roots & tubers | 5342.37   | 31946.61  | 21266.91  | 79121.6    | 30480.28  |
| Sugar crops    | 8026.46   | 63612.55  | 47635.99  | 135137.01  | 39271.79  |
| Vegetables     | 242.44    | 1043.31   | 516.68    | 1632.34    | 586.34    |
| <b>Ghana</b>   |           |           |           |            |           |
| Cereals        | 53839.42  | 76535.6   | 5821.41   | 16.92      | 0         |
| Fiber          | 2218.92   | 4012.1    | 414.31    | 1.79       | 0         |
| Fruit          | 11721.87  | 16138.32  | 1198.25   | 2.95       | 0         |
| Livestock      | 6351.14   | 9895.65   | 851.9     | 3.01       | 0         |
| Oil crops      | 1813.7    | 3302.18   | 342.96    | 1.47       | 0         |
| Pulses         | 12667.44  | 15299.89  | 763.43    | 0.37       | 0         |
| Roots & tubers | 67667.11  | 93660.77  | 7011.09   | 18.09      | 0         |
| Sugar crops    | 0         | 0         | 0         | 0          | 0         |
| Vegetables     | 677.52    | 1130.2    | 107.99    | 0.42       | 0         |
| <b>Greece</b>  |           |           |           |            |           |
| Cereals        | 46971.42  | 186820.13 | 80876.42  | 133706.27  | 13828.87  |
| Fiber          | 35136.63  | 140143.54 | 62468.73  | 109497.48  | 12579.38  |
| Fruit          | 1531.53   | 5940.72   | 2443.97   | 3844.65    | 368.79    |
| Livestock      | 18874.32  | 71633.19  | 27880.56  | 40794.47   | 3389.14   |
| Oil crops      | 2394.74   | 9124.28   | 3644.06   | 5637.26    | 533.86    |
| Pulses         | 485.95    | 1788.56   | 668.9     | 984.93     | 87.97     |
| Roots & tubers | 1256.79   | 5199.93   | 2406.72   | 4180.13    | 458.55    |
| Sugar crops    | 2395.11   | 9178.92   | 3765.61   | 6112.14    | 635.44    |
| Vegetables     | 1647.63   | 6155.71   | 2411.47   | 3797.59    | 384.12    |

**Grenada**

|                |   |   |   |   |   |
|----------------|---|---|---|---|---|
| Cereals        | 0 | 0 | 0 | 0 | 0 |
| Fiber          | 0 | 0 | 0 | 0 | 0 |
| Fruit          | 0 | 0 | 0 | 0 | 0 |
| Livestock      | 0 | 0 | 0 | 0 | 0 |
| Oil crops      | 0 | 0 | 0 | 0 | 0 |
| Pulses         | 0 | 0 | 0 | 0 | 0 |
| Roots & tubers | 0 | 0 | 0 | 0 | 0 |
| Sugar crops    | 0 | 0 | 0 | 0 | 0 |
| Vegetables     | 0 | 0 | 0 | 0 | 0 |

**Guatemala**

|                |         |          |          |          |          |
|----------------|---------|----------|----------|----------|----------|
| Cereals        | 4733.04 | 14993.99 | 25715.2  | 17436.6  | 21827    |
| Fiber          | 68.42   | 251.04   | 473.43   | 272.81   | 276.68   |
| Fruit          | 783.76  | 2868.42  | 5401.63  | 3121.39  | 3179.1   |
| Livestock      | 6021.8  | 16712.24 | 23106.28 | 12721.96 | 11962.85 |
| Oil crops      | 1019.8  | 3743.18  | 7061.54  | 4070.52  | 4129.83  |
| Pulses         | 1579.78 | 4899.56  | 8079.86  | 5166.14  | 6046.58  |
| Roots & tubers | 348.32  | 1275.87  | 2403.7   | 1387.02  | 1409.63  |
| Sugar crops    | 0       | 0        | 0        | 0        | 0        |
| Vegetables     | 189.04  | 676.26   | 1256.86  | 743.99   | 785.73   |

**Guinea**

|                |          |           |          |       |   |
|----------------|----------|-----------|----------|-------|---|
| Cereals        | 52498.13 | 101914.06 | 11207.19 | 50.31 | 0 |
| Fiber          | 4333.44  | 8832.16   | 1005.32  | 4.68  | 0 |
| Fruit          | 1591.66  | 3373.79   | 393.73   | 1.86  | 0 |
| Livestock      | 5336.56  | 8770.8    | 822.55   | 3.12  | 0 |
| Oil crops      | 248.98   | 463.41    | 49.31    | 0.21  | 0 |
| Pulses         | 777.06   | 2613.46   | 380.1    | 2.11  | 0 |
| Roots & tubers | 4870.38  | 9096.27   | 967.98   | 4.12  | 0 |
| Sugar crops    | 0        | 0         | 0        | 0     | 0 |
| Vegetables     | 0        | 0         | 0        | 0     | 0 |

**Guinea-Bissau**

|                |         |         |        |      |   |
|----------------|---------|---------|--------|------|---|
| Cereals        | 7364.95 | 8915.81 | 519.66 | 0.38 | 0 |
| Fiber          | 758.52  | 919.1   | 54.82  | 0.05 | 0 |
| Fruit          | 204.11  | 246.92  | 14.15  | 0.01 | 0 |
| Livestock      | 1556.27 | 1881.17 | 105.71 | 0.08 | 0 |
| Oil crops      | 345.71  | 418.21  | 23.94  | 0.02 | 0 |
| Pulses         | 65.03   | 78.7    | 4.55   | 0    | 0 |
| Roots & tubers | 208.39  | 252.07  | 14.4   | 0.01 | 0 |
| Sugar crops    | 0       | 0       | 0      | 0    | 0 |
| Vegetables     | 0       | 0       | 0      | 0    | 0 |

**Guyana**

|           |      |        |        |         |          |
|-----------|------|--------|--------|---------|----------|
| Cereals   | 5.08 | 331.18 | 715.88 | 4340.93 | 26950.49 |
| Fiber     | 0    | 0      | 0      | 0       | 0        |
| Fruit     | 0.14 | 3.93   | 6.8    | 29.72   | 128.57   |
| Livestock | 4.37 | 115.38 | 193.44 | 794.51  | 3095.32  |
| Oil crops | 2.14 | 51.66  | 82.86  | 307.58  | 963.52   |

|                 |            |             |            |           |           |
|-----------------|------------|-------------|------------|-----------|-----------|
| Pulses          | 0.09       | 2.46        | 4.24       | 18.39     | 78.76     |
| Roots & tubers  | 0.25       | 6.82        | 11.66      | 49.86     | 208.4     |
| Sugar crops     | 0          | 0           | 0          | 0         | 0         |
| Vegetables      | 0.02       | 0.46        | 0.79       | 3.32      | 13.64     |
| <b>Haiti</b>    |            |             |            |           |           |
| Cereals         | 5184.77    | 11726.14    | 10393.82   | 4387.77   | 1913.58   |
| Fiber           | 72.29      | 163.26      | 144.17     | 60.86     | 26.54     |
| Fruit           | 701.51     | 1583.43     | 1396.16    | 589.38    | 257.06    |
| Livestock       | 2476.65    | 5502.67     | 4648.09    | 1962.12   | 855.83    |
| Oil crops       | 194.41     | 440.34      | 391.84     | 165.42    | 72.15     |
| Pulses          | 1482.52    | 3353.84     | 2974.56    | 1255.62   | 547.73    |
| Roots & tubers  | 1583.72    | 3577.66     | 3161.34    | 1334.51   | 582.08    |
| Sugar crops     | 0          | 0           | 0          | 0         | 0         |
| Vegetables      | 13.52      | 31.39       | 29.7       | 12.54     | 5.47      |
| <b>Honduras</b> |            |             |            |           |           |
| Cereals         | 4121.22    | 8388.67     | 5622.85    | 6939.31   | 17879.4   |
| Fiber           | 57.45      | 120.73      | 90.51      | 101.27    | 249.26    |
| Fruit           | 745.84     | 1567.5      | 1174.71    | 1297.72   | 3172.01   |
| Livestock       | 5797.74    | 11967.63    | 8476.95    | 8521.57   | 19259.56  |
| Oil crops       | 95.18      | 199.31      | 147.52     | 169.95    | 425.85    |
| Pulses          | 744.05     | 1645.12     | 1484.65    | 2528.23   | 7407.24   |
| Roots & tubers  | 72.45      | 148.31      | 99.93      | 100.22    | 232.07    |
| Sugar crops     | 0          | 0           | 0          | 0         | 0         |
| Vegetables      | 141.89     | 295.7       | 214.61     | 232.45    | 562.29    |
| <b>Hungary</b>  |            |             |            |           |           |
| Cereals         | 98094.19   | 385590.31   | 165186.68  | 440160.5  | 143718.79 |
| Fiber           | 0          | 0           | 0          | 0         | 0         |
| Fruit           | 273.53     | 1212.19     | 605.93     | 1788.9    | 615.37    |
| Livestock       | 9456.67    | 52422.42    | 31509.18   | 74933.62  | 18366.61  |
| Oil crops       | 17911.41   | 76534.82    | 37148.31   | 114068.18 | 40599.63  |
| Pulses          | 698.87     | 3337.97     | 1801.17    | 4936.77   | 1524.13   |
| Roots & tubers  | 849.87     | 3117.64     | 1189.48    | 2926.26   | 927.27    |
| Sugar crops     | 3289.42    | 11824.57    | 4424.95    | 9611.46   | 2515.2    |
| Vegetables      | 296.88     | 977.11      | 299.26     | 695.02    | 233.8     |
| <b>Iceland</b>  |            |             |            |           |           |
| Cereals         | 0          | 0           | 0          | 0         | 0         |
| Fiber           | 0          | 0           | 0          | 0         | 0         |
| Fruit           | 0          | 0           | 0          | 0         | 0         |
| Livestock       | 0          | 0           | 0          | 0         | 0         |
| Oil crops       | 0          | 0           | 0          | 0         | 0         |
| Pulses          | 0          | 0           | 0          | 0         | 0         |
| Roots & tubers  | 0          | 0           | 0          | 0         | 0         |
| Sugar crops     | 0          | 0           | 0          | 0         | 0         |
| Vegetables      | 0          | 0           | 0          | 0         | 0         |
| <b>India</b>    |            |             |            |           |           |
| Cereals         | 7248578.97 | 13790422.38 | 1605850.41 | 303447.66 | 0         |

|                                   |            |            |           |           |          |
|-----------------------------------|------------|------------|-----------|-----------|----------|
| Fiber                             | 871323.48  | 2573515.72 | 355506.48 | 67179.59  | 0        |
| Fruit                             | 53509.38   | 121176.32  | 15174.25  | 2904.6    | 0        |
| Livestock                         | 1246453.29 | 2728066.18 | 335767.15 | 64580.03  | 0        |
| Oil crops                         | 1881219.87 | 4181876.69 | 518605.97 | 99565.15  | 0        |
| Pulses                            | 225269.29  | 549586.06  | 70674.12  | 13575.16  | 0        |
| Roots & tubers                    | 173653.45  | 321754.19  | 36906.02  | 6980.83   | 0        |
| Sugar crops                       | 0          | 0          | 0         | 0         | 0        |
| Vegetables                        | 66014.11   | 109577.6   | 11559.11  | 2254.3    | 0        |
| <b>Indonesia</b>                  |            |            |           |           |          |
| Cereals                           | 1618724.91 | 2266129.27 | 84575.07  | 750124.79 | 0        |
| Fiber                             | 480.2      | 844.88     | 44.75     | 437.4     | 0        |
| Fruit                             | 15085.47   | 26580.82   | 1411.59   | 13738.26  | 0        |
| Livestock                         | 173754.8   | 254709     | 10125.13  | 14079.76  | 0        |
| Oil crops                         | 197230.76  | 282788.94  | 10967.66  | 87813.78  | 0        |
| Pulses                            | 16363.01   | 28789.69   | 1524.78   | 14904.75  | 0        |
| Roots & tubers                    | 98513.77   | 140784.08  | 5158.35   | 17713.63  | 0        |
| Sugar crops                       | 0          | 0          | 0         | 0         | 0        |
| Vegetables                        | 3399.64    | 5981.46    | 316.79    | 3096.67   | 0        |
| <b>Iran (Islamic Republic of)</b> |            |            |           |           |          |
| Cereals                           | 676034.75  | 1368228.98 | 160414.43 | 539222.26 | 0        |
| Fiber                             | 33318.37   | 54944.44   | 5709.52   | 10330.11  | 0        |
| Fruit                             | 13830.57   | 30887.88   | 3797.3    | 10416.14  | 0        |
| Livestock                         | 100612.86  | 320547.4   | 44679.03  | 136033.67 | 0        |
| Oil crops                         | 18313.81   | 142646.94  | 23569.33  | 18522.95  | 0        |
| Pulses                            | 10238.39   | 22999.32   | 2842.79   | 8313.17   | 0        |
| Roots & tubers                    | 14089.93   | 28327.77   | 3301.45   | 20309.87  | 0        |
| Sugar crops                       | 7923.75    | 36752.23   | 5614.21   | 20037.59  | 0        |
| Vegetables                        | 13527.59   | 29214.27   | 3521.5    | 13724.35  | 0        |
| <b>Iraq</b>                       |            |            |           |           |          |
| Cereals                           | 78218.03   | 250385.03  | 65876.91  | 37080.3   | 16309.25 |
| Fiber                             | 1083.43    | 5011.8     | 1858.97   | 901.76    | 159.85   |
| Fruit                             | 1125.53    | 4862.96    | 1695.84   | 905.38    | 311.15   |
| Livestock                         | 4095.62    | 17369.71   | 5722.24   | 4876.58   | 5017.45  |
| Oil crops                         | 288.88     | 1207.06    | 397.24    | 200.73    | 34.43    |
| Pulses                            | 196.6      | 673.64     | 187.69    | 103.46    | 37.84    |
| Roots & tubers                    | 1074.11    | 5570.89    | 2013.58   | 1421.75   | 1029.56  |
| Sugar crops                       | 10.25      | 84.3       | 36.32     | 19.01     | 3.31     |
| Vegetables                        | 1069.36    | 5061.54    | 1893.14   | 922.69    | 163.34   |
| <b>Ireland</b>                    |            |            |           |           |          |
| Cereals                           | 8571.24    | 55768.04   | 39650.67  | 123201.18 | 38682.18 |
| Fiber                             | 0          | 0          | 0         | 0         | 0        |
| Fruit                             | 3.6        | 22.83      | 15.82     | 49.46     | 15.93    |
| Livestock                         | 23421.65   | 102764.36  | 51453.28  | 109778.2  | 22219.89 |
| Oil crops                         | 259.22     | 1647.05    | 1143.94   | 3581.35   | 1152.89  |
| Pulses                            | 117.9      | 747.05     | 517.49    | 1619.14   | 521.79   |

|                    |           |           |           |           |           |
|--------------------|-----------|-----------|-----------|-----------|-----------|
| Roots & tubers     | 199.39    | 1269.93   | 884.27    | 2770.17   | 890.95    |
| Sugar crops        | 317.69    | 3133.29   | 2673.97   | 8529.66   | 2639.21   |
| Vegetables         | 5.66      | 35.88     | 24.86     | 77.79     | 25.07     |
| <b>Israel</b>      |           |           |           |           |           |
| Cereals            | 6023.58   | 34959.17  | 13712.15  | 7009.66   | 1220.5    |
| Fiber              | 3450.96   | 18148.72  | 6900.77   | 3481.59   | 607.64    |
| Fruit              | 1115.99   | 4834.15   | 1674.53   | 828.86    | 144.37    |
| Livestock          | 35319.4   | 139485.29 | 45718.05  | 22354.49  | 3888.36   |
| Oil crops          | 501.24    | 2267.05   | 807.1     | 400.08    | 69.89     |
| Pulses             | 23.43     | 115.67    | 42.84     | 21.47     | 3.75      |
| Roots & tubers     | 2214.08   | 10278.9   | 3733.56   | 1845.62   | 323.6     |
| Sugar crops        | 0         | 0         | 0         | 0         | 0         |
| Vegetables         | 1086.29   | 4935.73   | 1766.64   | 874.01    | 152.88    |
| <b>Italy</b>       |           |           |           |           |           |
| Cereals            | 69405.24  | 450183.69 | 315349.09 | 893417.71 | 253163.39 |
| Fiber              | 0         | 0         | 0         | 0         | 0         |
| Fruit              | 2686.84   | 16074.37  | 10604.85  | 35460.24  | 12555.89  |
| Livestock          | 42519.28  | 274210.62 | 186975.98 | 377216.7  | 50214.17  |
| Oil crops          | 8992.28   | 62855.63  | 45128.69  | 105484.26 | 21190.13  |
| Pulses             | 588.08    | 3212.94   | 1983.11   | 5077.15   | 1310.01   |
| Roots & tubers     | 1817.24   | 7732.53   | 3866.72   | 10520.81  | 3101.74   |
| Sugar crops        | 3264.46   | 24334.29  | 18145.66  | 43074.73  | 8686.71   |
| Vegetables         | 2736.05   | 14888.32  | 9218.78   | 24052.73  | 6332.23   |
| <b>Ivory Coast</b> |           |           |           |           |           |
| Cereals            | 0         | 0         | 0         | 0         | 0         |
| Fiber              | 0         | 0         | 0         | 0         | 0         |
| Fruit              | 0         | 0         | 0         | 0         | 0         |
| Livestock          | 1701.5    | 9528.06   | 1579.58   | 530.62    | 0         |
| Oil crops          | 0         | 0         | 0         | 0         | 0         |
| Pulses             | 0         | 0         | 0         | 0         | 0         |
| Roots & tubers     | 0         | 0         | 0         | 0         | 0         |
| Sugar crops        | 0         | 0         | 0         | 0         | 0         |
| Vegetables         | 0         | 0         | 0         | 0         | 0         |
| <b>Jamaica</b>     |           |           |           |           |           |
| Cereals            | 39.94     | 67.15     | 5.69      | 2.4       | 1.05      |
| Fiber              | 0         | 0         | 0         | 0         | 0         |
| Fruit              | 573.94    | 964.54    | 80.36     | 33.92     | 14.8      |
| Livestock          | 7186.15   | 12294.96  | 1705.89   | 720.08    | 314.11    |
| Oil crops          | 1759.5    | 2958.28   | 250.59    | 105.79    | 46.13     |
| Pulses             | 68.56     | 115.26    | 9.76      | 4.12      | 1.8       |
| Roots & tubers     | 719.25    | 1212.26   | 111.96    | 47.26     | 20.61     |
| Sugar crops        | 0         | 0         | 0         | 0         | 0         |
| Vegetables         | 58.74     | 98.76     | 8.37      | 3.53      | 1.54      |
| <b>Japan</b>       |           |           |           |           |           |
| Cereals            | 315826.26 | 377260.53 | 145303.66 | 87069.29  | 0         |
| Fiber              | 0         | 0         | 0         | 0         | 0         |



|                   |           |           |           |           |           |
|-------------------|-----------|-----------|-----------|-----------|-----------|
| Fruit             | 1133.65   | 1612.1    | 659.47    | 511.35    | 0         |
| Livestock         | 387110.79 | 309425.07 | 94110.31  | 118673.73 | 0         |
| Oil crops         | 25735.14  | 33408.28  | 13294.44  | 10747.17  | 0         |
| Pulses            | 5175      | 7359.06   | 3010.42   | 2334.25   | 0         |
| Roots & tubers    | 19862.58  | 21747.55  | 8042.5    | 5961.18   | 0         |
| Sugar crops       | 14856.81  | 21127     | 8642.56   | 6701.35   | 0         |
| Vegetables        | 5084.58   | 7230.48   | 2957.82   | 2293.46   | 0         |
| <b>Jordan</b>     |           |           |           |           |           |
| Cereals           | 950.77    | 4398.11   | 1631.34   | 791.34    | 140.28    |
| Fiber             | 0         | 0         | 0         | 0         | 0         |
| Fruit             | 113.61    | 525.53    | 194.93    | 94.56     | 16.76     |
| Livestock         | 3783.21   | 17500.63  | 6491.31   | 3148.85   | 558.18    |
| Oil crops         | 104.63    | 484.01    | 179.53    | 87.09     | 15.44     |
| Pulses            | 0         | 0         | 0         | 0         | 0         |
| Roots & tubers    | 260.65    | 1205.73   | 447.23    | 216.94    | 38.46     |
| Sugar crops       | 0         | 0         | 0         | 0         | 0         |
| Vegetables        | 553.36    | 2559.78   | 949.47    | 460.57    | 81.64     |
| <b>Kazakhstan</b> |           |           |           |           |           |
| Cereals           | 30369.11  | 539093.19 | 254511.67 | 510297.83 | 880267.86 |
| Fiber             | 7017.2    | 53296.02  | 22620.37  | 26609.37  | 36253.83  |
| Fruit             | 58.91     | 328.36    | 129.44    | 73.09     | 30.24     |
| Livestock         | 15866.01  | 114554.65 | 48124.97  | 46395.44  | 53850.34  |
| Oil crops         | 2295.77   | 29578.2   | 13566.44  | 15905.97  | 21088.14  |
| Pulses            | 257.14    | 2886.15   | 1302.8    | 1999.93   | 3123.9    |
| Roots & tubers    | 1427.6    | 13722.15  | 6064.18   | 6804.14   | 8832.78   |
| Sugar crops       | 118.12    | 1879.05   | 879.39    | 636.89    | 450.36    |
| Vegetables        | 539.18    | 3487.86   | 1429.71   | 1048.54   | 858.81    |
| <b>Kenya</b>      |           |           |           |           |           |
| Cereals           | 65146.25  | 135347.99 | 15525.12  | 56006.24  | 0         |
| Fiber             | 1661.23   | 3584.7    | 421.69    | 1663.5    | 0         |
| Fruit             | 2321.54   | 5128.5    | 612.8     | 2212.22   | 0         |
| Livestock         | 49165.86  | 106137.06 | 12544.5   | 39828.83  | 0         |
| Oil crops         | 1361.13   | 2586.24   | 277.67    | 985.85    | 0         |
| Pulses            | 22471.03  | 44745.16  | 4987.45   | 14836.07  | 0         |
| Roots & tubers    | 11513.65  | 25062.76  | 2963.77   | 10817.88  | 0         |
| Sugar crops       | 0         | 0         | 0         | 0         | 0         |
| Vegetables        | 1204.08   | 2607.8    | 307.63    | 1157.29   | 0         |
| <b>Kuwait</b>     |           |           |           |           |           |
| Cereals           | 0         | 207.59    | 105.41    | 59        | 10.09     |
| Fiber             | 0         | 0         | 0         | 0         | 0         |
| Fruit             | 0         | 144.34    | 73.29     | 41.03     | 7.02      |
| Livestock         | 0         | 8862.94   | 4500.56   | 2519.12   | 431       |
| Oil crops         | 0         | 0.15      | 0.08      | 0.04      | 0.01      |
| Pulses            | 0         | 0         | 0         | 0         | 0         |
| Roots & tubers    | 0         | 178.28    | 90.53     | 50.67     | 8.67      |
| Sugar crops       | 0         | 0         | 0         | 0         | 0         |

|                                         |          |          |          |          |          |
|-----------------------------------------|----------|----------|----------|----------|----------|
| Vegetables                              | 0        | 331.6    | 168.39   | 94.25    | 16.13    |
| <b>Kyrgyzstan</b>                       |          |          |          |          |          |
| Cereals                                 | 12122.13 | 61712.81 | 22165.75 | 29981.3  | 44422.21 |
| Fiber                                   | 2281.46  | 13661.83 | 5219.23  | 6247.71  | 8512.28  |
| Fruit                                   | 26.42    | 138.19   | 50.18    | 66.87    | 98.1     |
| Livestock                               | 8991.46  | 33483.15 | 9918.41  | 7569.93  | 6650.87  |
| Oil crops                               | 640.14   | 3248.87  | 1152.64  | 1153.43  | 1363.95  |
| Pulses                                  | 390.49   | 6161.32  | 2880.87  | 1569.81  | 285.63   |
| Roots & tubers                          | 1354.21  | 6848.72  | 2453.68  | 3362.01  | 5019.88  |
| Sugar crops                             | 177.73   | 964.95   | 357.49   | 504.76   | 764.75   |
| Vegetables                              | 180.96   | 934.46   | 337.54   | 441.18   | 640.48   |
| <b>Lao People's Democratic Republic</b> |          |          |          |          |          |
| Cereals                                 | 78495.01 | 132870   | 6487.53  | 2383.27  | 0        |
| Fiber                                   | 919.46   | 1326.01  | 44.49    | 13.04    | 0        |
| Fruit                                   | 508.36   | 1007.57  | 61.54    | 24.56    | 0        |
| Livestock                               | 5329.73  | 8986.26  | 418.66   | 148.91   | 0        |
| Oil crops                               | 2158.59  | 3076.11  | 101.18   | 29.34    | 0        |
| Pulses                                  | 500.61   | 921.33   | 48.73    | 18.25    | 0        |
| Roots & tubers                          | 1359.22  | 2166.83  | 100.65   | 36.74    | 0        |
| Sugar crops                             | 0        | 0        | 0        | 0        | 0        |
| Vegetables                              | 0        | 0        | 0        | 0        | 0        |
| <b>Latvia</b>                           |          |          |          |          |          |
| Cereals                                 | 3150.13  | 25952.06 | 19958    | 85158.31 | 35925.17 |
| Fiber                                   | 0        | 0        | 0        | 0        | 0        |
| Fruit                                   | 1.73     | 13.55    | 10.05    | 38.74    | 15.46    |
| Livestock                               | 953.73   | 7529.02  | 5622.09  | 19640.06 | 7209.47  |
| Oil crops                               | 1098.08  | 9000.4   | 6898.9   | 27946.04 | 11397.13 |
| Pulses                                  | 11.2     | 90.27    | 68.43    | 257.34   | 99.78    |
| Roots & tubers                          | 167.81   | 1390.97  | 1073.96  | 4702.33  | 2013.59  |
| Sugar crops                             | 67.42    | 572.8    | 449.51   | 2118.89  | 942.81   |
| Vegetables                              | 4.62     | 37.12    | 28.04    | 107.89   | 42.63    |
| <b>Lebanon</b>                          |          |          |          |          |          |
| Cereals                                 | 2055.39  | 9435.08  | 3355.1   | 3573.95  | 4660.35  |
| Fiber                                   | 0        | 0        | 0        | 0        | 0        |
| Fruit                                   | 307.6    | 1355.9   | 459.42   | 508.93   | 673.86   |
| Livestock                               | 1696.75  | 9809.2   | 3784.11  | 7732.88  | 13641.81 |
| Oil crops                               | 86.77    | 416.22   | 150.35   | 85.76    | 35.91    |
| Pulses                                  | 45.74    | 240.96   | 89.62    | 102.33   | 137.56   |
| Roots & tubers                          | 221.49   | 2026.48  | 888.76   | 1529.64  | 2524.76  |
| Sugar crops                             | 44.31    | 234.61   | 87.55    | 107.21   | 151.14   |
| Vegetables                              | 210.3    | 1119.01  | 422.38   | 455.95   | 591.45   |
| <b>Lesotho</b>                          |          |          |          |          |          |
| Cereals                                 | 2110.52  | 4800.74  | 586.45   | 2.85     | 0        |
| Fiber                                   | 0        | 0        | 0        | 0        | 0        |
| Fruit                                   | 0        | 0        | 0        | 0        | 0        |

|                   |          |          |          |           |          |
|-------------------|----------|----------|----------|-----------|----------|
| Livestock         | 1560.66  | 3059.37  | 344.37   | 1.56      | 0        |
| Oil crops         | 0        | 0        | 0        | 0         | 0        |
| Pulses            | 295.02   | 585.7    | 65.95    | 0.3       | 0        |
| Roots & tubers    | 337.88   | 994.53   | 138.37   | 0.74      | 0        |
| Sugar crops       | 0        | 0        | 0        | 0         | 0        |
| Vegetables        | 0        | 0        | 0        | 0         | 0        |
| <b>Liberia</b>    |          |          |          |           |          |
| Cereals           | 3700.96  | 8370.15  | 1009.84  | 4.97      | 0        |
| Fiber             | 0        | 0        | 0        | 0         | 0        |
| Fruit             | 324.11   | 840.1    | 109.5    | 0.57      | 0        |
| Livestock         | 430.81   | 1853.86  | 290.43   | 1.67      | 0        |
| Oil crops         | 366.5    | 908.42   | 115.12   | 0.58      | 0        |
| Pulses            | 56.31    | 137.08   | 17.14    | 0.09      | 0        |
| Roots & tubers    | 1749.61  | 4173.03  | 519.52   | 2.61      | 0        |
| Sugar crops       | 0        | 0        | 0        | 0         | 0        |
| Vegetables        | 2.42     | 9.13     | 1.38     | 0.01      | 0        |
| <b>Libya</b>      |          |          |          |           |          |
| Cereals           | 2447.16  | 10616.13 | 3434.51  | 4806.02   | 7228.84  |
| Fiber             | 0        | 0        | 0        | 0         | 0        |
| Fruit             | 254.98   | 1125.27  | 368.46   | 523.51    | 793.92   |
| Livestock         | 2217.73  | 16222.41 | 6821.76  | 5216.67   | 4479.46  |
| Oil crops         | 100.2    | 442.18   | 144.79   | 205.72    | 311.98   |
| Pulses            | 119.87   | 529.03   | 173.22   | 246.12    | 373.24   |
| Roots & tubers    | 352.76   | 1556.81  | 509.76   | 724.28    | 1098.38  |
| Sugar crops       | 0        | 0        | 0        | 0         | 0        |
| Vegetables        | 281.9    | 1244.05  | 407.35   | 578.77    | 877.72   |
| <b>Lithuania</b>  |          |          |          |           |          |
| Cereals           | 13256.43 | 67958.71 | 40897.76 | 135888.72 | 47830.47 |
| Fiber             | 0        | 0        | 0        | 0         | 0        |
| Fruit             | 14.15    | 55.68    | 24.47    | 67.96     | 22.31    |
| Livestock         | 3640.68  | 19048.74 | 11511.18 | 44319.37  | 17823.04 |
| Oil crops         | 3110.64  | 17401.67 | 11044.2  | 37786.93  | 13695.63 |
| Pulses            | 501.96   | 1975.42  | 868.62   | 2406.18   | 787.6    |
| Roots & tubers    | 528.46   | 2414.31  | 1296.63  | 4085.28   | 1411.22  |
| Sugar crops       | 152.14   | 1558.5   | 1355.08  | 4828.51   | 1674.19  |
| Vegetables        | 13.97    | 54.9     | 24.13    | 67.24     | 22.12    |
| <b>Luxembourg</b> |          |          |          |           |          |
| Cereals           | 0        | 2881.38  | 3691.24  | 9833.77   | 1566.14  |
| Fiber             | 0        | 0        | 0        | 0         | 0        |
| Fruit             | 0        | 21.48    | 27.51    | 73.3      | 11.67    |
| Livestock         | 0        | 1863.17  | 2386.83  | 6358.72   | 1012.7   |
| Oil crops         | 0        | 960.5    | 1230.47  | 3278.07   | 522.07   |
| Pulses            | 0        | 41.13    | 52.69    | 140.38    | 22.36    |
| Roots & tubers    | 0        | 45.13    | 57.82    | 154.03    | 24.53    |
| Sugar crops       | 0        | 0        | 0        | 0         | 0        |
| Vegetables        | 0        | 0.1      | 0.13     | 0.33      | 0.05     |

**Madagascar**

|                |           |           |         |      |   |
|----------------|-----------|-----------|---------|------|---|
| Cereals        | 120982.43 | 146452.75 | 8529.03 | 5.52 | 0 |
| Fiber          | 1869.29   | 2263.7    | 133.02  | 0.09 | 0 |
| Fruit          | 1345.63   | 1629.55   | 95.75   | 0.06 | 0 |
| Livestock      | 23106.99  | 28060.15  | 1616.42 | 1.19 | 0 |
| Oil crops      | 648.43    | 785.25    | 46.14   | 0.03 | 0 |
| Pulses         | 8799.71   | 10628.01  | 584.66  | 0.36 | 0 |
| Roots & tubers | 20772.33  | 25130.55  | 1443.04 | 0.91 | 0 |
| Sugar crops    | 0         | 0         | 0       | 0    | 0 |
| Vegetables     | 152.33    | 184.47    | 10.84   | 0.01 | 0 |

**Malawi**

|                |          |          |         |         |   |
|----------------|----------|----------|---------|---------|---|
| Cereals        | 58318.13 | 86270.57 | 7572.17 | 8852.15 | 0 |
| Fiber          | 6840.78  | 10457.05 | 921.98  | 489.24  | 0 |
| Fruit          | 1864.89  | 3016.19  | 288.9   | 184.9   | 0 |
| Livestock      | 5133.16  | 6426.09  | 376.23  | 975.62  | 0 |
| Oil crops      | 9122.09  | 11042.49 | 577.34  | 10.25   | 0 |
| Pulses         | 10260.62 | 14296.93 | 1168.66 | 534.11  | 0 |
| Roots & tubers | 24441.19 | 35551.12 | 3017.29 | 2081.01 | 0 |
| Sugar crops    | 0        | 0        | 0       | 0       | 0 |
| Vegetables     | 294.74   | 476.7    | 45.66   | 29.22   | 0 |

**Malaysia**

|                |          |           |         |          |   |
|----------------|----------|-----------|---------|----------|---|
| Cereals        | 10201.65 | 72784.87  | 8324.48 | 76005.82 | 0 |
| Fiber          | 0        | 0         | 0       | 0        | 0 |
| Fruit          | 824.1    | 1858.88   | 133.26  | 851.35   | 0 |
| Livestock      | 32555.36 | 108225.12 | 9165.13 | 40968.98 | 0 |
| Oil crops      | 2140.1   | 4721.71   | 332.9   | 2119.7   | 0 |
| Pulses         | 0        | 0         | 0       | 0        | 0 |
| Roots & tubers | 212.65   | 564.61    | 45.6    | 208.71   | 0 |
| Sugar crops    | 0        | 0         | 0       | 0        | 0 |
| Vegetables     | 83.21    | 181.14    | 12.63   | 80.49    | 0 |

**Mali**

|                |           |           |          |       |   |
|----------------|-----------|-----------|----------|-------|---|
| Cereals        | 108679.32 | 196025.85 | 20362.52 | 85.67 | 0 |
| Fiber          | 43418.13  | 80024.84  | 8423.25  | 36.93 | 0 |
| Fruit          | 317.42    | 548.57    | 55.46    | 0.22  | 0 |
| Livestock      | 24767.74  | 49809.14  | 5671.74  | 25.95 | 0 |
| Oil crops      | 544.53    | 1134.23   | 134.94   | 0.63  | 0 |
| Pulses         | 9.02      | 11.46     | 0.77     | 0     | 0 |
| Roots & tubers | 1576.81   | 3615.1    | 441.75   | 2.19  | 0 |
| Sugar crops    | 0         | 0         | 0        | 0     | 0 |
| Vegetables     | 321.54    | 770.65    | 96.78    | 0.5   | 0 |

**Mauritania**

|           |         |          |         |      |   |
|-----------|---------|----------|---------|------|---|
| Cereals   | 5484.41 | 9030.31  | 815.67  | 3.21 | 0 |
| Fiber     | 0       | 0        | 0       | 0    | 0 |
| Fruit     | 113.39  | 209.17   | 21.48   | 0.1  | 0 |
| Livestock | 9992.42 | 15250.46 | 1265.92 | 4.45 | 0 |
| Oil crops | 0       | 0        | 0       | 0    | 0 |

|                   |           |           |           |           |           |
|-------------------|-----------|-----------|-----------|-----------|-----------|
| Pulses            | 1209.48   | 1882.55   | 159.86    | 0.56      | 0         |
| Roots & tubers    | 34.05     | 56.08     | 5.13      | 0.02      | 0         |
| Sugar crops       | 0         | 0         | 0         | 0         | 0         |
| Vegetables        | 0         | 0         | 0         | 0         | 0         |
| <b>Mauritius</b>  |           |           |           |           |           |
| Cereals           | 0         | 0         | 0         | 0         | 0         |
| Fiber             | 0         | 0         | 0         | 0         | 0         |
| Fruit             | 0         | 0         | 0         | 0         | 0         |
| Livestock         | 0         | 0         | 0         | 0         | 0         |
| Oil crops         | 0         | 0         | 0         | 0         | 0         |
| Pulses            | 0         | 0         | 0         | 0         | 0         |
| Roots & tubers    | 0         | 0         | 0         | 0         | 0         |
| Sugar crops       | 0         | 0         | 0         | 0         | 0         |
| Vegetables        | 0         | 0         | 0         | 0         | 0         |
| <b>Mexico</b>     |           |           |           |           |           |
| Cereals           | 300111.33 | 660320    | 583676.83 | 408243.33 | 599129.6  |
| Fiber             | 44.01     | 2319.27   | 8734.26   | 28339.33  | 93930.97  |
| Fruit             | 4270.81   | 11005.06  | 13488.56  | 8737.85   | 12340.24  |
| Livestock         | 123099.66 | 303397.92 | 343939.18 | 206971.56 | 246263.81 |
| Oil crops         | 14465     | 27134.57  | 11370.72  | 6987.71   | 9757.62   |
| Pulses            | 42485.08  | 79488.29  | 33355.06  | 21335.62  | 29649.92  |
| Roots & tubers    | 2435.78   | 5907.63   | 6648.69   | 4506.64   | 6186.22   |
| Sugar crops       | 0         | 0         | 0         | 0         | 0         |
| Vegetables        | 2896.56   | 6933.17   | 7762.46   | 6642.61   | 12113.25  |
| <b>Mongolia</b>   |           |           |           |           |           |
| Cereals           | 2349.7    | 3291      | 1299.61   | 8112.13   | 0         |
| Fiber             | 0         | 0         | 0         | 0         | 0         |
| Fruit             | 0         | 0         | 0         | 0         | 0         |
| Livestock         | 11151.32  | 11026.7   | 3712.73   | 12308.17  | 0         |
| Oil crops         | 78.31     | 1801.61   | 940.2     | 555.17    | 0         |
| Pulses            | 11.96     | 16        | 6.22      | 41.2      | 0         |
| Roots & tubers    | 243.37    | 334.83    | 131.48    | 837.18    | 0         |
| Sugar crops       | 0         | 0         | 0         | 0         | 0         |
| Vegetables        | 4.46      | 6.08      | 2.38      | 15.16     | 0         |
| <b>Montenegro</b> |           |           |           |           |           |
| Cereals           | 162.31    | 552       | 168.29    | 190.84    | 8.87      |
| Fiber             | 0         | 0         | 0         | 0         | 0         |
| Fruit             | 49.81     | 166.46    | 48.88     | 54.13     | 2.52      |
| Livestock         | 19918.03  | 70489.09  | 23229.11  | 27555.02  | 1281.08   |
| Oil crops         | 1.94      | 5.88      | 1.34      | 1.2       | 0.06      |
| Pulses            | 73.27     | 249.09    | 75.88     | 86.01     | 4         |
| Roots & tubers    | 274.78    | 929.77    | 280.47    | 315.98    | 14.69     |
| Sugar crops       | 0         | 0         | 0         | 0         | 0         |
| Vegetables        | 32.31     | 108.84    | 32.53     | 36.44     | 1.69      |
| <b>Morocco</b>    |           |           |           |           |           |
| Cereals           | 88156.41  | 315166.65 | 91692.82  | 91607     | 113074.42 |

|                   |           |            |          |          |          |
|-------------------|-----------|------------|----------|----------|----------|
| Fiber             | 11.27     | 36.56      | 9.82     | 8.9      | 10.25    |
| Fruit             | 1507.13   | 5111.52    | 1419.91  | 1313.71  | 1520     |
| Livestock         | 30174.58  | 92155.2    | 23082.4  | 14869.54 | 10296.44 |
| Oil crops         | 1247.71   | 4048.13    | 1084.56  | 987.11   | 1137.85  |
| Pulses            | 1001.14   | 3652.87    | 1071.32  | 874.63   | 858.67   |
| Roots & tubers    | 3261.57   | 10974.57   | 3023.89  | 2631.65  | 2856.09  |
| Sugar crops       | 4544.59   | 15740.87   | 4540.11  | 4353.04  | 5273.6   |
| Vegetables        | 2541.11   | 8558.77    | 2362.83  | 1957.84  | 2006.96  |
| <b>Mozambique</b> |           |            |          |          |          |
| Cereals           | 24037.96  | 65058.77   | 8773.38  | 11356    | 0        |
| Fiber             | 5936.46   | 9217.48    | 797.91   | 33150.41 | 0        |
| Fruit             | 303.58    | 836.16     | 112.88   | 193.29   | 0        |
| Livestock         | 7679.34   | 16067.3    | 1864.62  | 8.8      | 0        |
| Oil crops         | 2626.95   | 5560.11    | 649.21   | 1902.47  | 0        |
| Pulses            | 11397.49  | 19574.45   | 1977.66  | 1683.44  | 0        |
| Roots & tubers    | 17504.54  | 42827.35   | 5360.48  | 1406.93  | 0        |
| Sugar crops       | 0         | 0          | 0        | 0        | 0        |
| Vegetables        | 378.73    | 698.73     | 74.51    | 202.71   | 0        |
| <b>Myanmar</b>    |           |            |          |          |          |
| Cereals           | 762649.64 | 1399784.78 | 77512.09 | 29904.05 | 0        |
| Fiber             | 20667.94  | 34896.49   | 1680     | 4024.16  | 0        |
| Fruit             | 2038.2    | 3422.41    | 161.67   | 58.17    | 0        |
| Livestock         | 74946.64  | 118318.24  | 5167.94  | 9658.27  | 0        |
| Oil crops         | 89064.65  | 146949.66  | 6637.51  | 2330.87  | 0        |
| Pulses            | 176546.83 | 296079.48  | 13967.33 | 5024.57  | 0        |
| Roots & tubers    | 3742.35   | 6334.33    | 299.31   | 107.36   | 0        |
| Sugar crops       | 0         | 0          | 0        | 0        | 0        |
| Vegetables        | 3216.66   | 5400.32    | 255.02   | 91.79    | 0        |
| <b>Namibia</b>    |           |            |          |          |          |
| Cereals           | 2727.62   | 8738.42    | 1277.85  | 784.62   | 0        |
| Fiber             | 4.92      | 19.06      | 2.95     | 10.34    | 0        |
| Fruit             | 17.64     | 67.47      | 10.4     | 36.88    | 0        |
| Livestock         | 4176.36   | 6880.57    | 657.44   | 1870.46  | 0        |
| Oil crops         | 1.4       | 5.39       | 0.83     | 2.93     | 0        |
| Pulses            | 144.01    | 528.65     | 80.56    | 283.27   | 0        |
| Roots & tubers    | 0         | 0          | 0        | 0        | 0        |
| Sugar crops       | 0         | 0          | 0        | 0        | 0        |
| Vegetables        | 8.05      | 30.79      | 4.74     | 16.83    | 0        |
| <b>Nepal</b>      |           |            |          |          |          |
| Cereals           | 204539.36 | 377713.14  | 42588.47 | 8263.87  | 0        |
| Fiber             | 3.89      | 7.46       | 0.86     | 0.17     | 0        |
| Fruit             | 270.38    | 403.06     | 40.63    | 7.53     | 0        |
| Livestock         | 29253.03  | 52204.5    | 5753.14  | 1122.81  | 0        |
| Oil crops         | 2348.77   | 4503.97    | 516.18   | 100.75   | 0        |
| Pulses            | 2205.97   | 3866.33    | 423.04   | 82.11    | 0        |
| Roots & tubers    | 9319.14   | 16981.11   | 1897.71  | 369.09   | 0        |

|                    |           |            |           |           |           |
|--------------------|-----------|------------|-----------|-----------|-----------|
| Sugar crops        | 0         | 0          | 0         | 0         | 0         |
| Vegetables         | 0         | 0          | 0         | 0         | 0         |
| <b>Netherlands</b> |           |            |           |           |           |
| Cereals            | 5381.85   | 32215.34   | 21245.89  | 100654.18 | 45743.71  |
| Fiber              | 0         | 0          | 0         | 0         | 0         |
| Fruit              | 26.88     | 151.9      | 96.26     | 417.99    | 181.91    |
| Livestock          | 27257.91  | 181312.47  | 125951.39 | 314916.82 | 75319.91  |
| Oil crops          | 4.39      | 272.26     | 330.32    | 2150.4    | 1029.88   |
| Pulses             | 53.07     | 338.55     | 233.19    | 979.53    | 411.48    |
| Roots & tubers     | 1622.94   | 12036.46   | 9323.86   | 52422.11  | 25022.98  |
| Sugar crops        | 1889.1    | 10798.24   | 6969.89   | 34205.11  | 15795.44  |
| Vegetables         | 479.88    | 2709.56    | 1714.71   | 7489.05   | 3271.95   |
| <b>New Zealand</b> |           |            |           |           |           |
| Cereals            | 68.97     | 2036.14    | 3085.69   | 15550.41  | 79216.4   |
| Fiber              | 0         | 0          | 0         | 0         | 0         |
| Fruit              | 1.58      | 46.68      | 70.74     | 356.51    | 1816.11   |
| Livestock          | 815.98    | 22832.21   | 32863.29  | 141636.16 | 516588.41 |
| Oil crops          | 0.74      | 21.9       | 33.18     | 167.22    | 851.84    |
| Pulses             | 5.04      | 148.88     | 225.63    | 1137.06   | 5792.39   |
| Roots & tubers     | 5.29      | 156.15     | 236.64    | 1192.53   | 6074.96   |
| Sugar crops        | 0         | 0          | 0         | 0         | 0         |
| Vegetables         | 0.54      | 15.88      | 24.06     | 121.26    | 617.71    |
| <b>Nicaragua</b>   |           |            |           |           |           |
| Cereals            | 9355.52   | 19698.33   | 15111.28  | 9166.11   | 10021.17  |
| Fiber              | 154.17    | 328.81     | 262.95    | 158.29    | 171.25    |
| Fruit              | 199.09    | 430.4      | 358.82    | 214.15    | 228.87    |
| Livestock          | 4594.35   | 10739.66   | 11476.51  | 7912.47   | 10081.14  |
| Oil crops          | 334.08    | 712.62     | 570.24    | 343.3     | 371.43    |
| Pulses             | 8139.28   | 15200.62   | 6292.52   | 3373.23   | 3021.61   |
| Roots & tubers     | 257.01    | 547.25     | 434.82    | 260.54    | 280       |
| Sugar crops        | 0         | 0          | 0         | 0         | 0         |
| Vegetables         | 17.29     | 37.28      | 30.82     | 18.37     | 19.59     |
| <b>Niger</b>       |           |            |           |           |           |
| Cereals            | 149303.24 | 207061.67  | 15698.89  | 45978.9   | 0         |
| Fiber              | 1485.7    | 1970.23    | 139.52    | 0.32      | 0         |
| Fruit              | 56.32     | 81.77      | 6.59      | 27.39     | 0         |
| Livestock          | 28377.22  | 38091.94   | 2734.96   | 2981.33   | 0         |
| Oil crops          | 2914.18   | 4004.68    | 299.02    | 638.82    | 0         |
| Pulses             | 1166.58   | 1571.3     | 113.93    | 218.4     | 0         |
| Roots & tubers     | 1076.83   | 1467.37    | 107.87    | 274.48    | 0         |
| Sugar crops        | 0         | 0          | 0         | 0         | 0         |
| Vegetables         | 1592.17   | 2165.34    | 157.51    | 400.09    | 0         |
| <b>Nigeria</b>     |           |            |           |           |           |
| Cereals            | 856746.65 | 1474023.44 | 144203.3  | 40444.72  | 0         |
| Fiber              | 53912.64  | 101905.58  | 10887.25  | 48.36     | 0         |
| Fruit              | 7331      | 14731.77   | 1660.93   | 2307.95   | 0         |

|                 |            |            |           |          |         |
|-----------------|------------|------------|-----------|----------|---------|
| Livestock       | 63944.34   | 114964.24  | 11952.06  | 47293.73 | 0       |
| Oil crops       | 73086.38   | 134874.6   | 14069.36  | 13408.76 | 0       |
| Pulses          | 1522.67    | 2642.07    | 260.44    | 1.06     | 0       |
| Roots & tubers  | 274634.62  | 563307.32  | 63800.71  | 88461.99 | 0       |
| Sugar crops     | 0          | 0          | 0         | 0        | 0       |
| Vegetables      | 10130.33   | 14945.8    | 1224.11   | 1109.78  | 0       |
| <b>Norway</b>   |            |            |           |          |         |
| Cereals         | 6899.36    | 50959.55   | 36183.35  | 67547.84 | 6785.11 |
| Fiber           | 0          | 0          | 0         | 0        | 0       |
| Fruit           | 1.19       | 8.73       | 6.18      | 11.48    | 1.14    |
| Livestock       | 1855.72    | 21771.65   | 20063.16  | 45688.48 | 6207.61 |
| Oil crops       | 153.34     | 1126.86    | 796.87    | 1481.76  | 147.71  |
| Pulses          | 0          | 0          | 0         | 0        | 0       |
| Roots & tubers  | 211.75     | 1565.07    | 1111.93   | 2077     | 208.85  |
| Sugar crops     | 0          | 0          | 0         | 0        | 0       |
| Vegetables      | 4.54       | 33.33      | 23.57     | 43.82    | 4.37    |
| <b>Oman</b>     |            |            |           |          |         |
| Cereals         | 161.03     | 744.89     | 276.29    | 134.03   | 23.76   |
| Fiber           | 0          | 0          | 0         | 0        | 0       |
| Fruit           | 531.02     | 2456.45    | 911.14    | 441.98   | 78.35   |
| Livestock       | 956.69     | 4425.5     | 1641.5    | 796.27   | 141.15  |
| Oil crops       | 0          | 0          | 0         | 0        | 0       |
| Pulses          | 0          | 0          | 0         | 0        | 0       |
| Roots & tubers  | 12.38      | 57.26      | 21.24     | 10.3     | 1.83    |
| Sugar crops     | 0          | 0          | 0         | 0        | 0       |
| Vegetables      | 46.31      | 214.21     | 79.45     | 38.54    | 6.83    |
| <b>Pakistan</b> |            |            |           |          |         |
| Cereals         | 1041610.49 | 2456659.5  | 311174.17 | 59988.24 | 0       |
| Fiber           | 503797.02  | 1309561.54 | 171120.29 | 33191    | 0       |
| Fruit           | 5584.37    | 13233.19   | 1687.89   | 322.82   | 0       |
| Livestock       | 466219.37  | 804233.46  | 87981.81  | 16814.96 | 0       |
| Oil crops       | 48411.89   | 111051.75  | 13971.78  | 2676.37  | 0       |
| Pulses          | 14157.77   | 32227.07   | 4038.6    | 774.63   | 0       |
| Roots & tubers  | 9034.39    | 19439.62   | 2363.98   | 458.09   | 0       |
| Sugar crops     | 332.64     | 780.11     | 99.12     | 18.94    | 0       |
| Vegetables      | 5778.9     | 14348.08   | 1863.11   | 355.89   | 0       |
| <b>Panama</b>   |            |            |           |          |         |
| Cereals         | 3480.33    | 7810.73    | 6863.37   | 3116.67  | 1833.54 |
| Fiber           | 0          | 0          | 0         | 0        | 0       |
| Fruit           | 533.94     | 1388.14    | 1682.18   | 797.08   | 535.66  |
| Livestock       | 6282.73    | 12629.49   | 7599.96   | 3406.58  | 1914.3  |
| Oil crops       | 33.89      | 88.58      | 108.69    | 52.44    | 37.05   |
| Pulses          | 111.64     | 278.5      | 322.06    | 175.54   | 162.1   |
| Roots & tubers  | 104.54     | 280.01     | 353.45    | 160.08   | 93.35   |
| Sugar crops     | 0          | 0          | 0         | 0        | 0       |
| Vegetables      | 49.21      | 124.77     | 144.04    | 66.68    | 41.79   |



**Papua New Guinea**

|                |         |         |         |         |   |
|----------------|---------|---------|---------|---------|---|
| Cereals        | 363.79  | 433.29  | 152.78  | 80.33   | 0 |
| Fiber          | 0       | 0       | 0       | 0       | 0 |
| Fruit          | 1943.32 | 2841.07 | 1095.69 | 594.92  | 0 |
| Livestock      | 4743.38 | 3821.61 | 1021.16 | 471.8   | 0 |
| Oil crops      | 4722.39 | 6903.97 | 2662.59 | 1445.68 | 0 |
| Pulses         | 50.22   | 73.42   | 28.31   | 15.37   | 0 |
| Roots & tubers | 3573.94 | 5091.57 | 1944.29 | 1052.09 | 0 |
| Sugar crops    | 0       | 0       | 0       | 0       | 0 |
| Vegetables     | 1.17    | 1.71    | 0.66    | 0.36    | 0 |

**Paraguay**

|                |         |          |          |           |           |
|----------------|---------|----------|----------|-----------|-----------|
| Cereals        | 633.76  | 10794.7  | 11754.25 | 31199.02  | 156320.16 |
| Fiber          | 364.14  | 5875.58  | 5857.21  | 10638.27  | 29735.22  |
| Fruit          | 7.84    | 137.26   | 156.37   | 428.4     | 1889.74   |
| Livestock      | 603.16  | 9714.17  | 9648.84  | 17353.03  | 48513.22  |
|                |         |          |          |           | 1434091.0 |
| Oil crops      | 1098.97 | 26974.88 | 43455.5  | 218522.97 | 3         |
| Pulses         | 131.34  | 2076.86  | 1993.84  | 3126.08   | 6988.74   |
| Roots & tubers | 113.14  | 2093.11  | 2559.36  | 8366.28   | 43187.27  |
| Sugar crops    | 0       | 0        | 0        | 0         | 0         |
| Vegetables     | 4.19    | 72.83    | 82.31    | 197.51    | 584.63    |

**Peru**

|                |         |          |          |          |          |
|----------------|---------|----------|----------|----------|----------|
| Cereals        | 4165.91 | 64536.95 | 59408.44 | 75908.03 | 96568.06 |
| Fiber          | 961.99  | 14899.13 | 13725.66 | 17561.88 | 21959.95 |
| Fruit          | 262.59  | 4085.19  | 3798.14  | 5030.84  | 6508.88  |
| Livestock      | 3199.79 | 48967.46 | 43945.87 | 49754.46 | 45793.97 |
| Oil crops      | 25.24   | 390.75   | 359.58   | 458.22   | 573.67   |
| Pulses         | 420.75  | 6459.03  | 5835.25  | 6759.47  | 5909.85  |
| Roots & tubers | 813.95  | 12703.05 | 11892.36 | 16274.42 | 23158.27 |
| Sugar crops    | 0       | 0        | 0        | 0        | 0        |
| Vegetables     | 109.13  | 1676.32  | 1515.9   | 1785.18  | 1878.2   |

**Philippines**

|                |           |           |          |           |   |
|----------------|-----------|-----------|----------|-----------|---|
| Cereals        | 274522.99 | 681492.34 | 52713.08 | 465243.46 | 0 |
| Fiber          | 220.81    | 497.12    | 34.4     | 242.44    | 0 |
| Fruit          | 10469.63  | 27024.25  | 2115.2   | 13576.22  | 0 |
| Livestock      | 98044.25  | 222062.22 | 14665.36 | 18357.46  | 0 |
| Oil crops      | 50770.05  | 131058.78 | 10259.3  | 65874.85  | 0 |
| Pulses         | 1361.53   | 3514.39   | 275.07   | 1765.53   | 0 |
| Roots & tubers | 6333.66   | 17062.21  | 1356.42  | 3605.9    | 0 |
| Sugar crops    | 0         | 0         | 0        | 0         | 0 |
| Vegetables     | 480.3     | 1239.74   | 97.04    | 622.81    | 0 |

**Poland**

|           |           |           |           |           |           |
|-----------|-----------|-----------|-----------|-----------|-----------|
| Cereals   | 140396.65 | 563023.76 | 258404.58 | 880790.27 | 340486.51 |
| Fiber     | 0         | 0         | 0         | 0         | 0         |
| Fruit     | 361.24    | 1350.46   | 545.72    | 1478.34   | 491.65    |
| Livestock | 73214.04  | 273338.21 | 111201.84 | 301052.34 | 98659.46  |

|                           |           |           |           |           |           |
|---------------------------|-----------|-----------|-----------|-----------|-----------|
| Oil crops                 | 12837.89  | 85130.15  | 63707.76  | 327057.9  | 148377.67 |
| Pulses                    | 1905.75   | 7124.8    | 2877.14   | 7682.97   | 2518.34   |
| Roots & tubers            | 18609.6   | 63229.85  | 20784.62  | 42843.12  | 11801.44  |
| Sugar crops               | 6614.77   | 31019.95  | 17453.57  | 67135.86  | 26824.24  |
| Vegetables                | 1062.96   | 3882.59   | 1510.6    | 4117.02   | 1397.89   |
| <b>Portugal</b>           |           |           |           |           |           |
| Cereals                   | 5049.34   | 20216.84  | 9232.76   | 36119.79  | 15437.62  |
| Fiber                     | 0         | 0         | 0         | 0         | 0         |
| Fruit                     | 1091.39   | 3582.33   | 1084.73   | 2326.09   | 725.76    |
| Livestock                 | 19212.02  | 66584.17  | 22808.94  | 48027.96  | 13237.33  |
| Oil crops                 | 100.96    | 428.59    | 217.9     | 1262.6    | 634.35    |
| Pulses                    | 45.64     | 171.69    | 71.22     | 296.62    | 134.24    |
| Roots & tubers            | 1261.78   | 4415.81   | 1477.08   | 2086.62   | 237.22    |
| Sugar crops               | 70.54     | 654.63    | 574.44    | 2542.97   | 1029.28   |
| Vegetables                | 629.74    | 2369.44   | 983.36    | 4095.02   | 1852.79   |
| <b>Qatar</b>              |           |           |           |           |           |
| Cereals                   | 0         | 0         | 0         | 0         | 0         |
| Fiber                     | 0         | 0         | 0         | 0         | 0         |
| Fruit                     | 0         | 0         | 0         | 0         | 0         |
| Livestock                 | 299.78    | 1386.76   | 514.37    | 249.52    | 44.23     |
| Oil crops                 | 0         | 0         | 0         | 0         | 0         |
| Pulses                    | 0         | 0         | 0         | 0         | 0         |
| Roots & tubers            | 0         | 0         | 0         | 0         | 0         |
| Sugar crops               | 0         | 0         | 0         | 0         | 0         |
| Vegetables                | 0         | 0         | 0         | 0         | 0         |
| <b>Republic of Korea</b>  |           |           |           |           |           |
| Cereals                   | 197924.29 | 272270.36 | 8403.15   | 2345.55   | 0         |
| Fiber                     | 0         | 0         | 0         | 0         | 0         |
| Fruit                     | 1377.91   | 1891.8    | 58.19     | 16.22     | 0         |
| Livestock                 | 141630.37 | 193629.05 | 5905.53   | 1638.08   | 0         |
| Oil crops                 | 24779.77  | 32946.56  | 950.29    | 253.78    | 0         |
| Pulses                    | 740.09    | 1016.1    | 31.25     | 8.71      | 0         |
| Roots & tubers            | 5827.3    | 7938.19   | 240.49    | 66.41     | 0         |
| Sugar crops               | 0         | 0         | 0         | 0         | 0         |
| Vegetables                | 5737.99   | 7877.97   | 242.31    | 67.54     | 0         |
| <b>Romania</b>            |           |           |           |           |           |
| Cereals                   | 63846.41  | 289093.56 | 160324.42 | 614324.15 | 241770.45 |
| Fiber                     | 0         | 0         | 0         | 0         | 0         |
| Fruit                     | 197.75    | 1028.65   | 674.48    | 3270.26   | 1437.37   |
| Livestock                 | 23783.14  | 98138.51  | 46653.81  | 148442.33 | 53724.14  |
| Oil crops                 | 10131.26  | 52391     | 33490.88  | 148683.21 | 62767.28  |
| Pulses                    | 1001.89   | 4031.43   | 1804.46   | 4930.28   | 1604.85   |
| Roots & tubers            | 4743.81   | 19144.92  | 8605.11   | 20127.03  | 5287.57   |
| Sugar crops               | 870.43    | 3258.45   | 1318.64   | 3963.32   | 1460.07   |
| Vegetables                | 509.23    | 2140.87   | 1082.1    | 3925.65   | 1516.72   |
| <b>Russian Federation</b> |           |           |           |           |           |

|                                         |           |            |           |           |           |
|-----------------------------------------|-----------|------------|-----------|-----------|-----------|
|                                         |           |            |           |           | 2138888.1 |
| Cereals                                 | 446048.31 | 1900179.33 | 961221.42 | 4604401.1 | 2         |
| Fiber                                   | 0         | 0          | 0         | 0         | 0         |
| Fruit                                   | 149.62    | 818.92     | 539       | 3355.18   | 1682.94   |
| Livestock                               | 93089.65  | 417833.08  | 224067.98 | 845991.05 | 337028.07 |
| Oil crops                               | 38541.14  | 180280.17  | 102291.39 | 554352.86 | 267514.83 |
| Pulses                                  | 12727.94  | 55010.15   | 27582.49  | 110899.47 | 47475.75  |
| Roots & tubers                          | 39652.1   | 155701.77  | 68098.55  | 220916.42 | 84440.61  |
| Sugar crops                             | 15962.17  | 60310.44   | 26115.35  | 153301.02 | 78740.68  |
| Vegetables                              | 1755.64   | 7277.72    | 3490.94   | 14518.71  | 6368.46   |
| <b>Rwanda</b>                           |           |            |           |           |           |
| Cereals                                 | 12627.15  | 20097.06   | 1836.61   | 6.56      | 0         |
| Fiber                                   | 0         | 0          | 0         | 0         | 0         |
| Fruit                                   | 7997.88   | 13138.81   | 1254.15   | 4.69      | 0         |
| Livestock                               | 5009.85   | 6859.07    | 495.48    | 1.25      | 0         |
| Oil crops                               | 4679.32   | 5967.08    | 380.22    | 0.66      | 0         |
| Pulses                                  | 20848     | 32699.42   | 2947.92   | 10.22     | 0         |
| Roots & tubers                          | 14302.67  | 20502.66   | 1609.99   | 4.57      | 0         |
| Sugar crops                             | 0         | 0          | 0         | 0         | 0         |
| Vegetables                              | 154.54    | 185.89     | 9.15      | 0         | 0         |
| <b>Saint Lucia</b>                      |           |            |           |           |           |
| Cereals                                 | 0         | 0          | 0         | 0         | 0         |
| Fiber                                   | 0         | 0          | 0         | 0         | 0         |
| Fruit                                   | 0         | 0          | 0         | 0         | 0         |
| Livestock                               | 0         | 0          | 0         | 0         | 0         |
| Oil crops                               | 0         | 0          | 0         | 0         | 0         |
| Pulses                                  | 0         | 0          | 0         | 0         | 0         |
| Roots & tubers                          | 0         | 0          | 0         | 0         | 0         |
| Sugar crops                             | 0         | 0          | 0         | 0         | 0         |
| Vegetables                              | 0         | 0          | 0         | 0         | 0         |
| <b>Saint Vincent and the Grenadines</b> |           |            |           |           |           |
| Cereals                                 | 0         | 0          | 0         | 0         | 0         |
| Fiber                                   | 0         | 0          | 0         | 0         | 0         |
| Fruit                                   | 0         | 0          | 0         | 0         | 0         |
| Livestock                               | 0         | 0          | 0         | 0         | 0         |
| Oil crops                               | 0         | 0          | 0         | 0         | 0         |
| Pulses                                  | 0         | 0          | 0         | 0         | 0         |
| Roots & tubers                          | 0         | 0          | 0         | 0         | 0         |
| Sugar crops                             | 0         | 0          | 0         | 0         | 0         |
| Vegetables                              | 0         | 0          | 0         | 0         | 0         |
| <b>Saudi Arabia</b>                     |           |            |           |           |           |
| Cereals                                 | 59666.27  | 223685.29  | 70789.89  | 34332.04  | 5964.05   |
| Fiber                                   | 0         | 0          | 0         | 0         | 0         |
| Fruit                                   | 2773.28   | 9845.6     | 2919.98   | 1430.83   | 245.18    |
| Livestock                               | 17712.3   | 80514.43   | 27688.26  | 14158.36  | 2428.06   |
| Oil crops                               | 264.25    | 559.66     | 68.6      | 27.18     | 3.93      |

|                     |          |           |          |           |          |
|---------------------|----------|-----------|----------|-----------|----------|
| Pulses              | 73.32    | 290.43    | 95.51    | 46.67     | 8.13     |
| Roots & tubers      | 1053.52  | 3922.59   | 1250.65  | 599.85    | 104.87   |
| Sugar crops         | 0        | 0         | 0        | 0         | 0        |
| Vegetables          | 818.07   | 2594.2    | 687.59   | 332.48    | 56.29    |
| <b>Senegal</b>      |          |           |          |           |          |
| Cereals             | 28749.32 | 60549.68  | 7151.99  | 33.78     | 0        |
| Fiber               | 3235.13  | 10651.34  | 1551.45  | 8.65      | 0        |
| Fruit               | 190.24   | 256.82    | 19.24    | 0.05      | 0        |
| Livestock           | 6830.56  | 14741.18  | 1758.29  | 8.47      | 0        |
| Oil crops           | 1610.77  | 1979.84   | 135.48   | 0.17      | 0        |
| Pulses              | 8.64     | 10.48     | 0.65     | 0         | 0        |
| Roots & tubers      | 1391.27  | 1713.05   | 106.96   | 0.13      | 0        |
| Sugar crops         | 0        | 0         | 0        | 0         | 0        |
| Vegetables          | 594.39   | 1153.2    | 127.83   | 0.58      | 0        |
| <b>Serbia</b>       |          |           |          |           |          |
| Cereals             | 55445.41 | 203366.97 | 79668.37 | 208890.33 | 67817.3  |
| Fiber               | 0        | 0         | 0        | 0         | 0        |
| Fruit               | 375.88   | 1210.47   | 359.02   | 819.05    | 267.12   |
| Oil crops           | 13885.8  | 53769.62  | 23259.36 | 65855.25  | 22022.01 |
| Pulses              | 1719.6   | 5848.7    | 1976.6   | 4745.57   | 1506.52  |
| Roots & tubers      | 1037.77  | 3882.84   | 1583.54  | 4570.72   | 1602.55  |
| Sugar crops         | 5079.62  | 16017.81  | 4494.52  | 10446.24  | 3602.99  |
| Vegetables          | 278.44   | 969.52    | 342.39   | 802.39    | 242.49   |
| <b>Sierra Leone</b> |          |           |          |           |          |
| Cereals             | 18327.38 | 40952.56  | 4964.48  | 23.79     | 0        |
| Fiber               | 0        | 0         | 0        | 0         | 0        |
| Fruit               | 70.99    | 216.72    | 30.42    | 0.17      | 0        |
| Livestock           | 1242.43  | 1763.77   | 142.43   | 0.41      | 0        |
| Oil crops           | 144.99   | 318.06    | 38.44    | 0.18      | 0        |
| Pulses              | 1022.8   | 3054.3    | 429.4    | 2.3       | 0        |
| Roots & tubers      | 4919.94  | 11804.23  | 1482.18  | 7.58      | 0        |
| Sugar crops         | 0        | 0         | 0        | 0         | 0        |
| Vegetables          | 46.28    | 101.55    | 12.27    | 0.06      | 0        |
| <b>Slovakia</b>     |          |           |          |           |          |
| Cereals             | 26082.56 | 99998.14  | 43437.75 | 131708.79 | 46197.89 |
| Fiber               | 0        | 0         | 0        | 0         | 0        |
| Fruit               | 58.29    | 182.08    | 49.05    | 106.72    | 36.13    |
| Livestock           | 3198.51  | 16698.46  | 10033.94 | 31930.22  | 10939.09 |
| Oil crops           | 9918.21  | 36967.14  | 15506.54 | 47176.83  | 16627.98 |
| Pulses              | 442.78   | 1678.86   | 721.22   | 2218.06   | 786.69   |
| Roots & tubers      | 273.15   | 1190.55   | 609.58   | 1707.32   | 521.6    |
| Sugar crops         | 1014.46  | 4317.05   | 2192.48  | 6626.73   | 2171.91  |
| Vegetables          | 57.76    | 216.28    | 90.36    | 271.25    | 95.63    |
| <b>Slovenia</b>     |          |           |          |           |          |
| Cereals             | 7355.7   | 24588.64  | 7225.4   | 8005.39   | 372.04   |
| Fiber               | 0        | 0         | 0        | 0         | 0        |

|                     |           |           |           |           |           |
|---------------------|-----------|-----------|-----------|-----------|-----------|
| Fruit               | 151.88    | 532.53    | 172.47    | 202.64    | 9.42      |
| Livestock           | 7029.38   | 22516.08  | 5985      | 6173.62   | 286.94    |
| Oil crops           | 499.09    | 1671.89   | 493.62    | 548.52    | 25.49     |
| Pulses              | 252.28    | 864.91    | 268.05    | 307.02    | 14.28     |
| Roots & tubers      | 280.16    | 971.23    | 307.73    | 357.09    | 16.6      |
| Sugar crops         | 332.62    | 1113.99   | 328.75    | 365.26    | 16.98     |
| Vegetables          | 14.52     | 49.79     | 15.43     | 17.68     | 0.82      |
| <b>Somalia</b>      |           |           |           |           |           |
| Cereals             | 8740.48   | 12972.98  | 1034.4    | 3.37      | 0         |
| Fiber               | 809.76    | 1237.59   | 103.25    | 0.37      | 0         |
| Fruit               | 207.64    | 317.34    | 26.47     | 0.09      | 0         |
| Livestock           | 27052.56  | 52292.16  | 5732.41   | 25.71     | 0         |
| Oil crops           | 3443.28   | 5262.46   | 439.02    | 1.55      | 0         |
| Pulses              | 1287.08   | 2149.28   | 202.36    | 0.8       | 0         |
| Roots & tubers      | 356.71    | 545.17    | 45.48     | 0.16      | 0         |
| Sugar crops         | 0         | 0         | 0         | 0         | 0         |
| Vegetables          | 30.91     | 47.25     | 3.94      | 0.01      | 0         |
| <b>South Africa</b> |           |           |           |           |           |
| Cereals             | 46508.73  | 256189.29 | 42586.45  | 519660.04 | 0         |
| Fiber               | 1199.7    | 6538.16   | 1086.41   | 3653.14   | 0         |
| Fruit               | 5595.83   | 13801.1   | 1794.58   | 5733.15   | 0         |
| Livestock           | 52328.28  | 156242.94 | 21881.95  | 173918.99 | 0         |
| Oil crops           | 21690.5   | 74076.65  | 10896.61  | 56850.46  | 0         |
| Pulses              | 551.59    | 4545.85   | 798.9     | 5662.53   | 0         |
| Roots & tubers      | 3237.24   | 13922.91  | 2191.28   | 9515.79   | 0         |
| Sugar crops         | 0         | 0         | 0         | 0         | 0         |
| Vegetables          | 965.47    | 3841.32   | 593.49    | 2361.18   | 0         |
| <b>Spain</b>        |           |           |           |           |           |
| Cereals             | 115815.17 | 527879.96 | 282957.53 | 945828.18 | 345688.28 |
| Fiber               | 1131.04   | 6789.58   | 4904.29   | 35548.77  | 18550.39  |
| Fruit               | 5578.88   | 20752.72  | 8258.76   | 23655.65  | 8446.52   |
| Livestock           | 113555.86 | 400020.36 | 141425.49 | 272337.78 | 62551.53  |
| Oil crops           | 3876.78   | 18013.83  | 10160.88  | 51850.45  | 24351.41  |
| Pulses              | 2555.36   | 10319.9   | 4758.83   | 17277.29  | 7022.31   |
| Roots & tubers      | 2515.08   | 11078.11  | 5439.37   | 14713.5   | 4688.1    |
| Sugar crops         | 1860.96   | 11732.7   | 8363.15   | 36953.26  | 15587.22  |
| Vegetables          | 2725.8    | 11007.43  | 5075.36   | 18433.26  | 7494.27   |
| <b>Sri Lanka</b>    |           |           |           |           |           |
| Cereals             | 62830.98  | 118912.35 | 13630.8   | 39340.64  | 0         |
| Fiber               | 0         | 0         | 0         | 0         | 0         |
| Fruit               | 1019.95   | 2264.82   | 280.28    | 1049.84   | 0         |
| Livestock           | 9328.61   | 13627.11  | 1312.79   | 1516.43   | 0         |
| Oil crops           | 10245.32  | 19104.35  | 2183.28   | 5891.82   | 0         |
| Pulses              | 341.26    | 770.55    | 95.7      | 426.45    | 0         |
| Roots & tubers      | 999.59    | 2132.08   | 257.4     | 844.95    | 0         |
| Sugar crops         | 0         | 0         | 0         | 0         | 0         |

|                       |          |           |          |           |           |
|-----------------------|----------|-----------|----------|-----------|-----------|
| Vegetables            | 392.8    | 873.51    | 108.22   | 410.6     | 0         |
| <b>Sudan (former)</b> |          |           |          |           |           |
| Cereals               | 50268.17 | 267638.78 | 97270.97 | 113300.75 | 151803.63 |
| Fiber                 | 9546.36  | 36188.88  | 10874.17 | 13084.56  | 18299.9   |
| Fruit                 | 1235.6   | 4494.98   | 1307.94  | 1613.5    | 2299.36   |
| Livestock             | 50576.88 | 192082.21 | 58091.56 | 51214.81  | 54978.19  |
| Oil crops             | 8900.53  | 26976.97  | 6548.33  | 7152.78   | 9559.41   |
| Pulses                | 909.79   | 3324.83   | 969.35   | 1092.48   | 1463.89   |
| Roots & tubers        | 1028.31  | 3608.97   | 1018.49  | 1196.22   | 1656.34   |
| Sugar crops           | 0        | 0         | 0        | 0         | 0         |
| Vegetables            | 1969.1   | 6921.46   | 1954.68  | 2194.37   | 2943.32   |
| <b>Suriname</b>       |          |           |          |           |           |
| Cereals               | 0        | 89.97     | 223.92   | 1556.18   | 10625.21  |
| Fiber                 | 0        | 0         | 0        | 0         | 0         |
| Fruit                 | 0        | 4.44      | 11.05    | 76.79     | 524.31    |
| Livestock             | 0        | 12.48     | 31.07    | 215.93    | 1474.35   |
| Oil crops             | 0        | 0.76      | 1.89     | 13.14     | 89.74     |
| Pulses                | 0        | 0.03      | 0.09     | 0.6       | 4.12      |
| Roots & tubers        | 0        | 0.39      | 0.98     | 6.8       | 46.45     |
| Sugar crops           | 0        | 0         | 0        | 0         | 0         |
| Vegetables            | 0        | 0.04      | 0.11     | 0.74      | 5.06      |
| <b>Swaziland</b>      |          |           |          |           |           |
| Cereals               | 1051.33  | 2188.74   | 253.81   | 78.84     | 0         |
| Fiber                 | 174.7    | 510.66    | 71.2     | 54.93     | 0         |
| Fruit                 | 134.28   | 296.17    | 35.58    | 9.26      | 0         |
| Livestock             | 1143.87  | 2416.1    | 280.16   | 754.14    | 0         |
| Oil crops             | 0        | 0         | 0        | 0         | 0         |
| Pulses                | 63.06    | 166.16    | 21.94    | 4.47      | 0         |
| Roots & tubers        | 37.24    | 76.27     | 8.72     | 1.78      | 0         |
| Sugar crops           | 0        | 0         | 0        | 0         | 0         |
| Vegetables            | 8.17     | 17.88     | 2.14     | 0.59      | 0         |
| <b>Sweden</b>         |          |           |          |           |           |
| Cereals               | 15920.23 | 129023.28 | 98136.63 | 281851.93 | 82276.91  |
| Fiber                 | 0        | 0         | 0        | 0         | 0         |
| Fruit                 | 1.12     | 10.05     | 8.17     | 23.22     | 6.34      |
| Livestock             | 4476.63  | 36001.86  | 27241.14 | 82871.03  | 26154.93  |
| Oil crops             | 2347.59  | 17763.21  | 12851.3  | 35068.76  | 9933.77   |
| Pulses                | 283.33   | 2552.94   | 2075.35  | 5900.23   | 1609.55   |
| Roots & tubers        | 479.28   | 3414.14   | 2352.23  | 5315.9    | 1134.66   |
| Sugar crops           | 1163.93  | 8052.17   | 5405.81  | 11136.5   | 1960.86   |
| Vegetables            | 9.92     | 89.34     | 72.63    | 206.49    | 56.33     |
| <b>Switzerland</b>    |          |           |          |           |           |
| Cereals               | 6208.53  | 33680.36  | 22035.54 | 47411.4   | 6481.35   |
| Fiber                 | 0        | 0         | 0        | 0         | 0         |
| Fruit                 | 64.04    | 408.98    | 293.17   | 626.94    | 82.4      |
| Livestock             | 6875.57  | 52801.31  | 39750.77 | 80354.2   | 9385.09   |

|                                                  |           |            |           |          |          |
|--------------------------------------------------|-----------|------------|-----------|----------|----------|
| Oil crops                                        | 2136.76   | 8660.03    | 4175.66   | 8241.82  | 1115.94  |
| Pulses                                           | 216.12    | 1228.96    | 832.85    | 1806.71  | 247.22   |
| Roots & tubers                                   | 158.85    | 1658.53    | 1454.74   | 3211.3   | 419.93   |
| Sugar crops                                      | 371.18    | 4088.58    | 3672.01   | 8230.24  | 1096.96  |
| Vegetables                                       | 11.23     | 63.97      | 43.44     | 94.32    | 12.92    |
| <b>Syrian Arab Republic</b>                      |           |            |           |          |          |
| Cereals                                          | 143134.72 | 407414.37  | 96342.47  | 59774.56 | 41784.2  |
| Fiber                                            | 39010.85  | 130845.62  | 37365.69  | 28422.42 | 27163.58 |
| Fruit                                            | 952.81    | 3283.77    | 961.52    | 744.77   | 726.19   |
| Livestock                                        | 26839.43  | 94494.6    | 27729.91  | 17819.63 | 12020.32 |
| Oil crops                                        | 1399.26   | 4550.79    | 1259.06   | 949.14   | 900.14   |
| Pulses                                           | 363.63    | 1214.32    | 345       | 263.85   | 254.1    |
| Roots & tubers                                   | 1432.06   | 4562.45    | 1232.83   | 916.97   | 854.43   |
| Sugar crops                                      | 2948.69   | 8879.42    | 2273.61   | 1300.01  | 717.3    |
| Vegetables                                       | 1389.66   | 4827.03    | 1426.82   | 1059.22  | 973.2    |
| <b>Tajikistan</b>                                |           |            |           |          |          |
| Cereals                                          | 11321.26  | 50317.32   | 16832.91  | 14679.69 | 15260.93 |
| Fiber                                            | 14880.75  | 65486.07   | 21788.5   | 19275.04 | 20411.2  |
| Fruit                                            | 106.46    | 466.2      | 154.6     | 136.68   | 144.62   |
| Livestock                                        | 2490.26   | 11745.54   | 4030      | 4496.06  | 5867.27  |
| Oil crops                                        | 44.79     | 223.1      | 80.5      | 57.32    | 43.81    |
| Pulses                                           | 302.28    | 1433.36    | 500.99    | 395.26   | 359.67   |
| Roots & tubers                                   | 938.32    | 4182.61    | 1399.93   | 1231.44  | 1291.76  |
| Sugar crops                                      | 0         | 0          | 0         | 0        | 0        |
| Vegetables                                       | 400.85    | 1758.46    | 583.9     | 515.01   | 543.42   |
| <b>Thailand</b>                                  |           |            |           |          |          |
| Cereals                                          | 594961.73 | 1670471.61 | 137602.74 | 59465.83 | 0        |
| Fiber                                            | 836.33    | 2515.18    | 217.67    | 95.24    | 0        |
| Fruit                                            | 6187.05   | 15647.38   | 1217.93   | 521.16   | 0        |
| Livestock                                        | 63025.1   | 277021.18  | 28081.77  | 12645.37 | 0        |
| Oil crops                                        | 26944.72  | 82849.92   | 7313.49   | 3218.02  | 0        |
| Pulses                                           | 8302.39   | 16740.83   | 1047.7    | 421.82   | 0        |
| Roots & tubers                                   | 48788.07  | 180854.95  | 17390.89  | 7773.89  | 0        |
| Sugar crops                                      | 0         | 0          | 0         | 0        | 0        |
| Vegetables                                       | 436.81    | 1108.34    | 86.46     | 37.01    | 0        |
| <b>The former Yugoslav Republic of Macedonia</b> |           |            |           |          |          |
| Cereals                                          | 3879.93   | 20608.56   | 12671.34  | 25150.47 | 3072.32  |
| Fiber                                            | 0         | 0          | 0         | 0        | 0        |
| Fruit                                            | 122       | 621.54     | 370.96    | 736.29   | 91.12    |
| Livestock                                        | 1971.07   | 7517       | 3045.22   | 4868.2   | 493.92   |
| Oil crops                                        | 60.8      | 282.95     | 152.05    | 283.79   | 32.89    |
| Pulses                                           | 106.13    | 539.71     | 320.49    | 631.7    | 77.35    |
| Roots & tubers                                   | 172.13    | 917.41     | 551.81    | 1046.66  | 118.2    |
| Sugar crops                                      | 21.07     | 115.16     | 72.9      | 147.27   | 18.36    |
| Vegetables                                       | 85.65     | 435.15     | 258.88    | 512.67   | 63.27    |

|                            |           |            |           |           |           |
|----------------------------|-----------|------------|-----------|-----------|-----------|
| <b>Togo</b>                |           |            |           |           |           |
| Cereals                    | 22587.15  | 39684.14   | 3957.33   | 16.39     | 0         |
| Fiber                      | 7351.08   | 8889.93    | 505.24    | 0.33      | 0         |
| Fruit                      | 73.08     | 142.18     | 15.68     | 0.07      | 0         |
| Livestock                  | 2874.86   | 4074.62    | 313.69    | 0.89      | 0         |
| Oil crops                  | 200.81    | 345.02     | 34.84     | 0.14      | 0         |
| Pulses                     | 3842.73   | 7318.06    | 798.42    | 3.54      | 0         |
| Roots & tubers             | 5547.82   | 9917.58    | 1012.83   | 4.21      | 0         |
| Sugar crops                | 0         | 0          | 0         | 0         | 0         |
| Vegetables                 | 18.19     | 26.94      | 2.37      | 0.01      | 0         |
| <b>Trinidad and Tobago</b> |           |            |           |           |           |
| Cereals                    | 0         | 23.13      | 92.56     | 88.06     | 144.27    |
| Fiber                      | 0         | 0          | 0         | 0         | 0         |
| Fruit                      | 0         | 9.13       | 36.51     | 34.74     | 56.91     |
| Livestock                  | 0         | 0          | 0         | 0         | 0         |
| Oil crops                  | 0         | 20.72      | 82.9      | 78.86     | 129.21    |
| Pulses                     | 0         | 0.88       | 3.53      | 3.36      | 5.51      |
| Roots & tubers             | 0         | 1.32       | 5.27      | 5.01      | 8.21      |
| Sugar crops                | 0         | 0          | 0         | 0         | 0         |
| Vegetables                 | 0         | 1.23       | 4.91      | 4.67      | 7.65      |
| <b>Tunisia</b>             |           |            |           |           |           |
| Cereals                    | 27971.88  | 113742.92  | 36171.1   | 36182.94  | 43919.97  |
| Fiber                      | 70.15     | 308.37     | 102.69    | 108.67    | 137.42    |
| Fruit                      | 627.42    | 1938.74    | 496.72    | 464.07    | 556.45    |
| Livestock                  | 7397.41   | 37492.14   | 13597.19  | 9389.04   | 6667.92   |
| Oil crops                  | 817.34    | 3932.22    | 1364.79   | 1393.4    | 1688.94   |
| Pulses                     | 325.59    | 1431.23    | 476.56    | 504.51    | 638.13    |
| Roots & tubers             | 619.18    | 2071.54    | 555.26    | 765.72    | 1164.55   |
| Sugar crops                | 0         | 0          | 0         | 0         | 0         |
| Vegetables                 | 541.16    | 2550.19    | 887.71    | 1768.07   | 3096.95   |
| <b>Turkey</b>              |           |            |           |           |           |
| Cereals                    | 625556.76 | 2006697.65 | 528514.19 | 460599.07 | 505979.74 |
| Fiber                      | 103251.15 | 383783.15  | 118484.42 | 86941.86  | 76120.25  |
| Fruit                      | 7348.76   | 22009.24   | 5305.77   | 4518.49   | 4852.08   |
| Livestock                  | 124414.69 | 378325.68  | 93344.54  | 61279.37  | 43528.76  |
| Oil crops                  | 19745.71  | 77882.26   | 24643.69  | 13902.13  | 5598.65   |
| Pulses                     | 6382.51   | 20493.81   | 5394.63   | 3467.36   | 2312.66   |
| Roots & tubers             | 14606.06  | 35761.51   | 6380.27   | 4161.13   | 3395.91   |
| Sugar crops                | 36212.67  | 96831.23   | 19969.88  | 12421.88  | 8319.48   |
| Vegetables                 | 16697.84  | 50417.01   | 12318.41  | 9662.19   | 9377.5    |
| <b>Turkmenistan</b>        |           |            |           |           |           |
| Cereals                    | 8611.02   | 143936.02  | 67640.22  | 83925.56  | 114993.25 |
| Fiber                      | 5921.21   | 98199.4    | 46114.63  | 57818.88  | 79808.24  |
| Fruit                      | 47.32     | 784.74     | 368.52    | 461.94    | 637.51    |
| Livestock                  | 2489.47   | 32584.82   | 14970.23  | 19914.11  | 28700.99  |
| Oil crops                  | 0         | 0          | 0         | 0         | 0         |



|                                    |           |            |           |            |           |
|------------------------------------|-----------|------------|-----------|------------|-----------|
| Pulses                             | 55.78     | 927.09     | 435.45    | 545.27     | 751.92    |
| Roots & tubers                     | 54.17     | 1170.88    | 560.27    | 607.5      | 745.79    |
| Sugar crops                        | 62.42     | 992.08     | 464.24    | 577.09     | 792.69    |
| Vegetables                         | 68.32     | 1133.8     | 532.46    | 667.44     | 921.02    |
| <b>Uganda</b>                      |           |            |           |            |           |
| Cereals                            | 73204.05  | 129762.21  | 13271.46  | 54.17      | 0         |
| Fiber                              | 6219.23   | 12283.39   | 1371.12   | 6.16       | 0         |
| Fruit                              | 26358.07  | 49280.88   | 5276.53   | 23.26      | 0         |
| Livestock                          | 23910.42  | 52801.98   | 6373.47   | 30.97      | 0         |
| Oil crops                          | 42631.39  | 62660.2    | 5236.44   | 16.04      | 0         |
| Pulses                             | 29854.46  | 53911.69   | 5637.01   | 23.03      | 0         |
| Roots & tubers                     | 31302.67  | 60208.13   | 6510.14   | 29.28      | 0         |
| Sugar crops                        | 0         | 0          | 0         | 0          | 0         |
| Vegetables                         | 678.93    | 1295.63    | 141.05    | 0.61       | 0         |
| <b>Ukraine</b>                     |           |            |           |            |           |
| Cereals                            | 285215.72 | 1105015.24 | 479233.06 | 1472007.46 | 532314.56 |
| Fiber                              | 0         | 0          | 0         | 0          | 0         |
| Fruit                              | 282.81    | 1111.41    | 492.38    | 1611.79    | 612.1     |
| Livestock                          | 62759.14  | 233087.87  | 93646.34  | 255963.49  | 85621.08  |
| Oil crops                          | 73489.36  | 287251.02  | 125767.4  | 401090.57  | 150039.43 |
| Pulses                             | 5960.13   | 28352.36   | 16200.28  | 57318.54   | 21331.91  |
| Roots & tubers                     | 18861.28  | 82373.04   | 41728.68  | 114981.73  | 35111.41  |
| Sugar crops                        | 11474.57  | 52017.61   | 27676.37  | 97893.24   | 37668.16  |
| Vegetables                         | 1418.33   | 5460.87    | 2348.69   | 7819.8     | 3033.26   |
| <b>United Arab Emirates</b>        |           |            |           |            |           |
| Cereals                            | 0.44      | 2.03       | 0.75      | 0.36       | 0.06      |
| Fiber                              | 0         | 0          | 0         | 0          | 0         |
| Fruit                              | 1516.21   | 7013.76    | 2601.54   | 1261.97    | 223.7     |
| Livestock                          | 647.11    | 2993.42    | 1110.32   | 538.6      | 95.47     |
| Oil crops                          | 0         | 0          | 0         | 0          | 0         |
| Pulses                             | 0         | 0          | 0         | 0          | 0         |
| Roots & tubers                     | 12.91     | 59.71      | 22.15     | 10.74      | 1.9       |
| Sugar crops                        | 0         | 0          | 0         | 0          | 0         |
| Vegetables                         | 107.34    | 496.54     | 184.18    | 89.34      | 15.84     |
| <b>United Kingdom</b>              |           |            |           |            |           |
| Cereals                            | 135535.41 | 668307.85  | 383574.74 | 1159366.17 | 379169.87 |
| Fiber                              | 0         | 0          | 0         | 0          | 0         |
| Fruit                              | 13.08     | 110.56     | 86.46     | 278.25     | 91.72     |
| Livestock                          | 51848.66  | 286671.21  | 168883.64 | 370500.51  | 81276.08  |
| Oil crops                          | 37367.97  | 181658.45  | 103233.78 | 301039.33  | 94356.47  |
| Pulses                             | 1496.02   | 12644.21   | 9888.35   | 31823.16   | 10489.41  |
| Roots & tubers                     | 1678.78   | 15459.42   | 12725.01  | 43525.58   | 14876     |
| Sugar crops                        | 1637.05   | 15314.3    | 12714.45  | 47235.74   | 17398.32  |
| Vegetables                         | 95.11     | 803.83     | 628.63    | 2023.09    | 666.84    |
| <b>United Republic of Tanzania</b> |           |            |           |            |           |

|                                           |           |            |            |             |           |
|-------------------------------------------|-----------|------------|------------|-------------|-----------|
| Cereals                                   | 114441.56 | 282713.86  | 36177.01   | 184.25      | 0         |
| Fiber                                     | 17982.97  | 49990      | 6786.15    | 35.9        | 0         |
| Fruit                                     | 6431.31   | 17654.98   | 2366.94    | 12.44       | 0         |
| Livestock                                 | 34412.6   | 66956.8    | 7212.18    | 32.53       | 0         |
| Oil crops                                 | 13425.66  | 35952.95   | 4790.95    | 25.12       | 0         |
| Pulses                                    | 49414.22  | 95177.67   | 10254.51   | 45.64       | 0         |
| Roots & tubers                            | 20574.05  | 60821.71   | 8485.46    | 45.6        | 0         |
| Sugar crops                               | 0         | 0          | 0          | 0           | 0         |
| Vegetables                                | 360.76    | 1066.31    | 148.17     | 0.79        | 0         |
| <b>United States of America</b>           |           |            |            |             |           |
|                                           |           |            |            |             | 12322160. |
| Cereals                                   | 2329.91   | 1208449.74 | 2590627.52 | 12191574.64 | 29        |
|                                           |           |            |            |             | 1706471.8 |
| Fiber                                     | 188.42    | 134119.5   | 317605.83  | 1610074.64  | 5         |
| Fruit                                     | 38.48     | 9659.09    | 15087.58   | 45704.51    | 41791.46  |
|                                           |           |            |            |             | 2414063.7 |
| Livestock                                 | 2941.65   | 802336.54  | 1289384.69 | 3592711.74  | 6         |
|                                           |           |            |            |             | 13128417. |
| Oil crops                                 | 1822.29   | 1170286.44 | 2700874.65 | 12996661.04 | 92        |
| Pulses                                    | 50.91     | 21777.02   | 41648.9    | 168959.24   | 146082.77 |
| Roots & tubers                            | 72.75     | 26652.44   | 46049.55   | 148349.98   | 87382.96  |
| Sugar crops                               | 7.72      | 10020.49   | 27625.81   | 160729.2    | 187613.9  |
| Vegetables                                | 17        | 7842.62    | 15641.77   | 61875.88    | 50666.28  |
| <b>Uruguay</b>                            |           |            |            |             |           |
| Cereals                                   | 278.34    | 6545.48    | 10293.97   | 41407.99    | 182206.78 |
| Fiber                                     | 0         | 0          | 0          | 0           | 0         |
| Fruit                                     | 3.64      | 85.21      | 133.85     | 485.88      | 1513.59   |
| Livestock                                 | 149.68    | 3672.89    | 5929.6     | 24998.3     | 116154.59 |
| Oil crops                                 | 94.3      | 2433.28    | 4026.28    | 25934.98    | 221405.84 |
| Pulses                                    | 1.9       | 45.01      | 71.08      | 266.44      | 922.85    |
| Roots & tubers                            | 2.18      | 62.21      | 107.79     | 484.78      | 2252.78   |
| Sugar crops                               | 0         | 0          | 0          | 0           | 0         |
| Vegetables                                | 0.52      | 14.33      | 24.44      | 107.99      | 497.18    |
| <b>Uzbekistan</b>                         |           |            |            |             |           |
| Cereals                                   | 63788.55  | 380542.64  | 147768.53  | 136553.78   | 150645.97 |
| Fiber                                     | 87047.13  | 519319.21  | 201654.18  | 186320.45   | 205505.61 |
| Fruit                                     | 469.77    | 2797.99    | 1085.87    | 1004.74     | 1110.03   |
| Livestock                                 | 17382.56  | 127684.33  | 52568.5    | 38288.23    | 28974.18  |
| Oil crops                                 | 178.78    | 1068.54    | 414.85     | 358.54      | 365.37    |
| Pulses                                    | 52.23     | 302.49     | 116.3      | 99.4        | 100.29    |
| Roots & tubers                            | 1154.73   | 6839.75    | 2650.11    | 2456.44     | 2721.31   |
| Sugar crops                               | 0         | 0          | 0          | 0           | 0         |
| Vegetables                                | 1307.09   | 7772.54    | 3015.09    | 2789.62     | 3083.05   |
| <b>Venezuela (Bolivarian Republic of)</b> |           |            |            |             |           |
| Cereals                                   | 1153.89   | 19560.28   | 21234.85   | 49795.66    | 179784.34 |
| Fiber                                     | 34.98     | 597.22     | 653.35     | 1532.05     | 5224.56   |

|                 |           |            |           |           |          |
|-----------------|-----------|------------|-----------|-----------|----------|
| Fruit           | 33.49     | 603.22     | 709.12    | 1956.95   | 7455.72  |
| Livestock       | 2228.21   | 34835.09   | 32566.48  | 47704.09  | 115079.1 |
| Oil crops       | 85.45     | 1453.82    | 1584.38   | 3712.43   | 12997.56 |
| Pulses          | 43.16     | 708        | 728.48    | 1401.37   | 3576.56  |
| Roots & tubers  | 43.77     | 780.99     | 907.06    | 2456.41   | 9391.52  |
| Sugar crops     | 1.14      | 19.41      | 21.2      | 49.63     | 170.03   |
| Vegetables      | 18.26     | 311.76     | 341.46    | 802.39    | 2735.9   |
| <b>Viet Nam</b> |           |            |           |           |          |
| Cereals         | 420231.35 | 1484182.13 | 139001.14 | 763572.59 | 0        |
| Fiber           | 2091.5    | 4798.39    | 346.26    | 1258.98   | 0        |
| Fruit           | 3899.31   | 9040.8     | 655.72    | 2468.18   | 0        |
| Livestock       | 132393.38 | 203083.87  | 8124.82   | 76525.83  | 0        |
| Oil crops       | 30543.54  | 74590.47   | 5807.47   | 11173.98  | 0        |
| Pulses          | 10710.99  | 23161.15   | 1611.09   | 2317.81   | 0        |
| Roots & tubers  | 35734.75  | 63891.6    | 3478.66   | 5278.92   | 0        |
| Sugar crops     | 0         | 0          | 0         | 0         | 0        |
| Vegetables      | 650.62    | 1518.4     | 111.02    | 329.72    | 0        |
| <b>Yemen</b>    |           |            |           |           |          |
| Cereals         | 11684.79  | 50024.89   | 16448.43  | 8439.48   | 1437.48  |
| Fiber           | 1038.86   | 4089.86    | 1272.16   | 647.85    | 109.88   |
| Fruit           | 364.89    | 1730.78    | 598.93    | 311.43    | 53.05    |
| Livestock       | 11905.92  | 28957.5    | 5252.59   | 2311.75   | 374.79   |
| Oil crops       | 609.59    | 2194.3     | 636.65    | 321.22    | 54.15    |
| Pulses          | 251.48    | 990.03     | 307.95    | 156.83    | 26.6     |
| Roots & tubers  | 465.44    | 1993.04    | 652.37    | 336.01    | 57.08    |
| Sugar crops     | 0         | 0          | 0         | 0         | 0        |
| Vegetables      | 368.01    | 1972.57    | 724.49    | 379.08    | 64.82    |
| <b>Zambia</b>   |           |            |           |           |          |
| Cereals         | 22293.54  | 55212.95   | 7178.94   | 14241.13  | 0        |
| Fiber           | 5334.31   | 14425.88   | 1971.75   | 21785.04  | 0        |
| Fruit           | 9.38      | 15.11      | 1.42      | 2.67      | 0        |
| Livestock       | 6591.53   | 11386.66   | 1132.09   | 3393.65   | 0        |
| Oil crops       | 4811      | 16347.12   | 2412.5    | 2280.15   | 0        |
| Pulses          | 435.54    | 726.5      | 70.4      | 166.98    | 0        |
| Roots & tubers  | 5099.16   | 7235.5     | 541.89    | 350.77    | 0        |
| Sugar crops     | 0         | 0          | 0         | 0         | 0        |
| Vegetables      | 146.7     | 241.19     | 23.03     | 56.23     | 0        |
| <b>Zimbabwe</b> |           |            |           |           |          |
| Cereals         | 17890.23  | 81979.52   | 13088     | 4235.74   | 0        |
| Fiber           | 8123.75   | 48647.39   | 8168.89   | 4499      | 0        |
| Fruit           | 153.88    | 1057.3     | 181.37    | 20.92     | 0        |
| Livestock       | 15355.03  | 24045.43   | 2199.8    | 147.6     | 0        |
| Oil crops       | 8577.44   | 19371.43   | 2405.62   | 1037.66   | 0        |
| Pulses          | 1019.48   | 3753.55    | 569.48    | 122.57    | 0        |
| Roots & tubers  | 851.73    | 1836.15    | 221.96    | 122.56    | 0        |
| Sugar crops     | 0         | 0          | 0         | 0         | 0        |

|            |      |        |       |      |   |
|------------|------|--------|-------|------|---|
| Vegetables | 2.54 | 144.01 | 27.62 | 0.42 | 0 |
|------------|------|--------|-------|------|---|

**Vitamin A production (T)**

|                    | < 2 ha | 2 - 20 ha | 20 - 50 ha | 50 - 200 ha | > 200 ha |
|--------------------|--------|-----------|------------|-------------|----------|
| <b>Afghanistan</b> |        |           |            |             |          |
| Cereals            | 0.01   | 0.02      | 0          | 0.01        | 0        |
| Fiber              | 0      | 0         | 0          | 0           | 0        |
| Fruit              | 0      | 0.01      | 0          | 0           | 0        |
| Livestock          | 0.26   | 0.33      | 0.03       | 0.01        | 0        |
| Oil crops          | 0      | 0         | 0          | 0           | 0        |
| Pulses             | 0      | 0         | 0          | 0           | 0        |
| Roots & tubers     | 0      | 0         | 0          | 0           | 0        |
| Sugar crops        | 0      | 0         | 0          | 0           | 0        |
| Vegetables         | 0      | 0         | 0          | 0           | 0        |
| <b>Albania</b>     |        |           |            |             |          |
| Cereals            | 0      | 0.01      | 0          | 0           | 0        |
| Fiber              | 0      | 0         | 0          | 0           | 0        |
| Fruit              | 0      | 0         | 0          | 0           | 0        |
| Livestock          | 0.08   | 0.24      | 0.05       | 0.04        | 0        |
| Oil crops          | 0      | 0         | 0          | 0           | 0        |
| Pulses             | 0      | 0         | 0          | 0           | 0        |
| Roots & tubers     | 0      | 0         | 0          | 0           | 0        |
| Sugar crops        | 0      | 0         | 0          | 0           | 0        |
| Vegetables         | 0.01   | 0.03      | 0.01       | 0.01        | 0        |
| <b>Algeria</b>     |        |           |            |             |          |
| Cereals            | 0      | 0         | 0          | 0           | 0        |
| Fiber              | 0      | 0         | 0          | 0           | 0        |
| Fruit              | 0.01   | 0.05      | 0.01       | 0.01        | 0.01     |
| Livestock          | 0.12   | 0.51      | 0.16       | 0.13        | 0.12     |
| Oil crops          | 0.01   | 0.02      | 0          | 0.01        | 0.01     |
| Pulses             | 0      | 0         | 0          | 0           | 0        |
| Roots & tubers     | 0      | 0         | 0          | 0           | 0        |
| Sugar crops        | 0      | 0         | 0          | 0           | 0        |
| Vegetables         | 0.03   | 0.17      | 0.06       | 0.03        | 0.01     |
| <b>Angola</b>      |        |           |            |             |          |
| Cereals            | 0.02   | 0.03      | 0          | 0           | 0        |
| Fiber              | 0      | 0         | 0          | 0           | 0        |
| Fruit              | 0.01   | 0.01      | 0          | 0           | 0        |
| Livestock          | 0.03   | 0.04      | 0          | 0.01        | 0        |
| Oil crops          | 0      | 0         | 0          | 0           | 0        |
| Pulses             | 0      | 0         | 0          | 0           | 0        |
| Roots & tubers     | 1.21   | 2.33      | 0.26       | 0.19        | 0        |
| Sugar crops        | 0      | 0         | 0          | 0           | 0        |
| Vegetables         | 0      | 0         | 0          | 0           | 0        |
| <b>Argentina</b>   |        |           |            |             |          |
| Cereals            | 0      | 0.02      | 0.04       | 0.2         | 1.35     |

|                   |      |      |      |      |      |
|-------------------|------|------|------|------|------|
| Fiber             | 0    | 0    | 0    | 0    | 0    |
| Fruit             | 0    | 0.01 | 0.01 | 0.03 | 0.2  |
| Livestock         | 0.02 | 0.33 | 0.33 | 0.7  | 2.91 |
| Oil crops         | 0    | 0.01 | 0.01 | 0.06 | 0.43 |
| Pulses            | 0    | 0    | 0    | 0    | 0.01 |
| Roots & tubers    | 0.01 | 0.13 | 0.15 | 0.38 | 1.13 |
| Sugar crops       | 0    | 0    | 0    | 0    | 0    |
| Vegetables        | 0    | 0.01 | 0.01 | 0.04 | 0.21 |
| <b>Armenia</b>    |      |      |      |      |      |
| Cereals           | 0    | 0    | 0    | 0    | 0    |
| Fiber             | 0    | 0    | 0    | 0    | 0    |
| Fruit             | 0    | 0.01 | 0    | 0    | 0    |
| Livestock         | 0.03 | 0.14 | 0.05 | 0.03 | 0    |
| Oil crops         | 0    | 0    | 0    | 0    | 0    |
| Pulses            | 0    | 0    | 0    | 0    | 0    |
| Roots & tubers    | 0    | 0    | 0    | 0    | 0    |
| Sugar crops       | 0    | 0    | 0    | 0    | 0    |
| Vegetables        | 0.01 | 0.06 | 0.03 | 0.01 | 0    |
| <b>Australia</b>  |      |      |      |      |      |
| Cereals           | 0    | 0    | 0    | 0.01 | 0.09 |
| Fiber             | 0    | 0    | 0    | 0    | 0    |
| Fruit             | 0    | 0    | 0    | 0.01 | 0.1  |
| Livestock         | 0    | 0.01 | 0.03 | 0.28 | 3.45 |
| Oil crops         | 0    | 0    | 0    | 0    | 0.02 |
| Pulses            | 0    | 0    | 0    | 0    | 0.02 |
| Roots & tubers    | 0    | 0    | 0    | 0.02 | 0.21 |
| Sugar crops       | 0    | 0    | 0    | 0    | 0    |
| Vegetables        | 0    | 0    | 0    | 0.01 | 0.13 |
| <b>Austria</b>    |      |      |      |      |      |
| Cereals           | 0.01 | 0.05 | 0.03 | 0.06 | 0.01 |
| Fiber             | 0    | 0    | 0    | 0    | 0    |
| Fruit             | 0    | 0.01 | 0    | 0.01 | 0    |
| Livestock         | 0.06 | 0.36 | 0.25 | 0.5  | 0.06 |
| Oil crops         | 0    | 0    | 0    | 0    | 0    |
| Pulses            | 0    | 0    | 0    | 0    | 0    |
| Roots & tubers    | 0    | 0    | 0    | 0    | 0    |
| Sugar crops       | 0    | 0.02 | 0.01 | 0.01 | 0    |
| Vegetables        | 0    | 0.01 | 0    | 0    | 0    |
| <b>Azerbaijan</b> |      |      |      |      |      |
| Cereals           | 0    | 0.01 | 0    | 0    | 0    |
| Fiber             | 0    | 0    | 0    | 0    | 0    |
| Fruit             | 0    | 0    | 0    | 0    | 0    |
| Livestock         | 0.07 | 0.25 | 0.07 | 0.06 | 0.06 |
| Oil crops         | 0    | 0    | 0    | 0    | 0    |
| Pulses            | 0    | 0    | 0    | 0    | 0    |
| Roots & tubers    | 0    | 0    | 0    | 0    | 0    |

|                   |      |      |      |      |      |
|-------------------|------|------|------|------|------|
| Sugar crops       | 0    | 0    | 0    | 0    | 0    |
| Vegetables        | 0.03 | 0.09 | 0.02 | 0.02 | 0.01 |
| <b>Bangladesh</b> |      |      |      |      |      |
| Cereals           | 0.01 | 0.03 | 0    | 0.01 | 0    |
| Fiber             | 0    | 0    | 0    | 0    | 0    |
| Fruit             | 0.01 | 0.02 | 0    | 0.01 | 0    |
| Livestock         | 0.5  | 0.92 | 0.1  | 0.14 | 0    |
| Oil crops         | 0    | 0    | 0    | 0    | 0    |
| Pulses            | 0    | 0.01 | 0    | 0    | 0    |
| Roots & tubers    | 0.39 | 0.83 | 0.1  | 0.25 | 0    |
| Sugar crops       | 0    | 0    | 0    | 0    | 0    |
| Vegetables        | 0.01 | 0.03 | 0    | 0    | 0    |
| <b>Belarus</b>    |      |      |      |      |      |
| Cereals           | 0    | 0.02 | 0.01 | 0.02 | 0.01 |
| Fiber             | 0    | 0    | 0    | 0    | 0    |
| Fruit             | 0    | 0    | 0    | 0    | 0    |
| Livestock         | 0.16 | 0.62 | 0.28 | 0.86 | 0.32 |
| Oil crops         | 0    | 0    | 0    | 0    | 0    |
| Pulses            | 0    | 0    | 0    | 0    | 0    |
| Roots & tubers    | 0    | 0    | 0    | 0    | 0    |
| Sugar crops       | 0    | 0.01 | 0.01 | 0.03 | 0.01 |
| Vegetables        | 0.01 | 0.03 | 0.01 | 0.03 | 0.01 |
| <b>Belgium</b>    |      |      |      |      |      |
| Cereals           | 0.01 | 0.03 | 0.01 | 0.01 | 0    |
| Fiber             | 0    | 0    | 0    | 0    | 0    |
| Fruit             | 0    | 0    | 0    | 0    | 0    |
| Livestock         | 0.08 | 0.37 | 0.19 | 0.56 | 0.19 |
| Oil crops         | 0    | 0    | 0    | 0    | 0    |
| Pulses            | 0    | 0    | 0    | 0    | 0    |
| Roots & tubers    | 0    | 0    | 0    | 0    | 0    |
| Sugar crops       | 0.01 | 0.02 | 0.01 | 0.04 | 0.01 |
| Vegetables        | 0.01 | 0.03 | 0.01 | 0.03 | 0.01 |
| <b>Belize</b>     |      |      |      |      |      |
| Cereals           | 0    | 0    | 0    | 0    | 0    |
| Fiber             | 0    | 0    | 0    | 0    | 0    |
| Fruit             | 0    | 0.01 | 0.02 | 0.01 | 0    |
| Livestock         | 0    | 0    | 0    | 0    | 0    |
| Oil crops         | 0    | 0    | 0    | 0    | 0    |
| Pulses            | 0    | 0    | 0    | 0    | 0    |
| Roots & tubers    | 0    | 0    | 0    | 0    | 0    |
| Sugar crops       | 0    | 0    | 0    | 0    | 0    |
| Vegetables        | 0    | 0    | 0    | 0    | 0    |
| <b>Benin</b>      |      |      |      |      |      |
| Cereals           | 0.03 | 0.04 | 0    | 0    | 0    |
| Fiber             | 0    | 0    | 0    | 0    | 0    |
| Fruit             | 0    | 0    | 0    | 0    | 0    |

|                                         |      |      |      |      |      |
|-----------------------------------------|------|------|------|------|------|
| Livestock                               | 0.01 | 0.02 | 0    | 0    | 0    |
| Oil crops                               | 0    | 0    | 0    | 0    | 0    |
| Pulses                                  | 0    | 0    | 0    | 0    | 0    |
| Roots & tubers                          | 0.2  | 0.25 | 0.02 | 0    | 0    |
| Sugar crops                             | 0    | 0    | 0    | 0    | 0    |
| Vegetables                              | 0.02 | 0.03 | 0    | 0    | 0    |
| <b>Bhutan</b>                           |      |      |      |      |      |
| Cereals                                 | 0    | 0    | 0    | 0    | 0    |
| Fiber                                   | 0    | 0    | 0    | 0    | 0    |
| Fruit                                   | 0    | 0    | 0    | 0    | 0    |
| Livestock                               | 0.01 | 0.01 | 0    | 0    | 0    |
| Oil crops                               | 0    | 0    | 0    | 0    | 0    |
| Pulses                                  | 0    | 0    | 0    | 0    | 0    |
| Roots & tubers                          | 0    | 0    | 0    | 0    | 0    |
| Sugar crops                             | 0    | 0    | 0    | 0    | 0    |
| Vegetables                              | 0    | 0    | 0    | 0    | 0    |
| <b>Bolivia (Plurinational State of)</b> |      |      |      |      |      |
| Cereals                                 | 0    | 0.01 | 0.01 | 0.01 | 0.04 |
| Fiber                                   | 0    | 0    | 0    | 0    | 0    |
| Fruit                                   | 0    | 0.05 | 0.04 | 0.04 | 0.05 |
| Livestock                               | 0    | 0.03 | 0.03 | 0.07 | 0.14 |
| Oil crops                               | 0    | 0    | 0    | 0    | 0.01 |
| Pulses                                  | 0    | 0    | 0    | 0    | 0    |
| Roots & tubers                          | 0    | 0.01 | 0    | 0.01 | 0.02 |
| Sugar crops                             | 0    | 0    | 0    | 0    | 0    |
| Vegetables                              | 0    | 0    | 0    | 0.01 | 0.03 |
| <b>Bosnia and Herzegovina</b>           |      |      |      |      |      |
| Cereals                                 | 0.01 | 0.03 | 0.01 | 0.02 | 0    |
| Fiber                                   | 0    | 0    | 0    | 0    | 0    |
| Fruit                                   | 0    | 0    | 0    | 0    | 0    |
| Livestock                               | 0.03 | 0.11 | 0.05 | 0.08 | 0.01 |
| Oil crops                               | 0    | 0    | 0    | 0    | 0    |
| Pulses                                  | 0    | 0    | 0    | 0    | 0    |
| Roots & tubers                          | 0    | 0    | 0    | 0    | 0    |
| Sugar crops                             | 0    | 0    | 0    | 0    | 0    |
| Vegetables                              | 0    | 0.01 | 0    | 0    | 0    |
| <b>Botswana</b>                         |      |      |      |      |      |
| Cereals                                 | 0    | 0    | 0    | 0    | 0    |
| Fiber                                   | 0    | 0    | 0    | 0    | 0    |
| Fruit                                   | 0    | 0    | 0    | 0    | 0    |
| Livestock                               | 0    | 0.02 | 0    | 0.01 | 0    |
| Oil crops                               | 0    | 0    | 0    | 0    | 0    |
| Pulses                                  | 0    | 0    | 0    | 0    | 0    |
| Roots & tubers                          | 0    | 0    | 0    | 0    | 0    |
| Sugar crops                             | 0    | 0    | 0    | 0    | 0    |

|                          |      |      |      |      |      |
|--------------------------|------|------|------|------|------|
| Vegetables               | 0    | 0    | 0    | 0    | 0    |
| <b>Brazil</b>            |      |      |      |      |      |
| Cereals                  | 0.01 | 0.15 | 0.17 | 0.5  | 2.85 |
| Fiber                    | 0    | 0    | 0    | 0    | 0    |
| Fruit                    | 0.01 | 0.18 | 0.17 | 0.28 | 1.06 |
| Livestock                | 0.08 | 1.24 | 1.25 | 2.51 | 8.89 |
| Oil crops                | 0    | 0    | 0.01 | 0.05 | 0.48 |
| Pulses                   | 0    | 0.01 | 0.01 | 0.01 | 0.02 |
| Roots & tubers           | 0.03 | 0.44 | 0.41 | 0.62 | 1.4  |
| Sugar crops              | 0    | 0    | 0    | 0    | 0    |
| Vegetables               | 0    | 0.07 | 0.08 | 0.22 | 0.93 |
| <b>Brunei Darussalam</b> |      |      |      |      |      |
| Cereals                  | 0    | 0    | 0    | 0    | 0    |
| Fiber                    | 0    | 0    | 0    | 0    | 0    |
| Fruit                    | 0    | 0    | 0    | 0    | 0    |
| Livestock                | 0    | 0.01 | 0    | 0    | 0    |
| Oil crops                | 0    | 0    | 0    | 0    | 0    |
| Pulses                   | 0    | 0    | 0    | 0    | 0    |
| Roots & tubers           | 0    | 0    | 0    | 0    | 0    |
| Sugar crops              | 0    | 0    | 0    | 0    | 0    |
| Vegetables               | 0    | 0    | 0    | 0    | 0    |
| <b>Bulgaria</b>          |      |      |      |      |      |
| Cereals                  | 0    | 0.02 | 0.01 | 0.05 | 0.02 |
| Fiber                    | 0    | 0    | 0    | 0    | 0    |
| Fruit                    | 0    | 0    | 0    | 0    | 0    |
| Livestock                | 0.06 | 0.24 | 0.09 | 0.23 | 0.07 |
| Oil crops                | 0    | 0    | 0    | 0.01 | 0    |
| Pulses                   | 0    | 0    | 0    | 0    | 0    |
| Roots & tubers           | 0    | 0    | 0    | 0    | 0    |
| Sugar crops              | 0    | 0    | 0    | 0    | 0    |
| Vegetables               | 0    | 0.02 | 0.01 | 0.02 | 0.01 |
| <b>Burkina Faso</b>      |      |      |      |      |      |
| Cereals                  | 0.01 | 0.02 | 0    | 0.03 | 0    |
| Fiber                    | 0    | 0    | 0    | 0    | 0    |
| Fruit                    | 0    | 0    | 0    | 0    | 0    |
| Livestock                | 0.08 | 0.1  | 0.01 | 0.01 | 0    |
| Oil crops                | 0    | 0    | 0    | 0    | 0    |
| Pulses                   | 0    | 0    | 0    | 0    | 0    |
| Roots & tubers           | 0.09 | 0.18 | 0.02 | 0.08 | 0    |
| Sugar crops              | 0    | 0    | 0    | 0    | 0    |
| Vegetables               | 0    | 0    | 0    | 0    | 0    |
| <b>Burundi</b>           |      |      |      |      |      |
| Cereals                  | 0    | 0.01 | 0    | 0    | 0    |
| Fiber                    | 0    | 0    | 0    | 0    | 0    |
| Fruit                    | 0.01 | 0.02 | 0    | 0    | 0    |
| Livestock                | 0.01 | 0.01 | 0    | 0    | 0    |



|                                 |      |      |      |      |      |
|---------------------------------|------|------|------|------|------|
| Oil crops                       | 0    | 0    | 0    | 0    | 0    |
| Pulses                          | 0    | 0    | 0    | 0    | 0    |
| Roots & tubers                  | 1.92 | 2.32 | 0.12 | 0    | 0    |
| Sugar crops                     | 0    | 0    | 0    | 0    | 0    |
| Vegetables                      | 0    | 0    | 0    | 0    | 0    |
| <b>Cambodia</b>                 |      |      |      |      |      |
| Cereals                         | 0.01 | 0.02 | 0    | 0    | 0    |
| Fiber                           | 0    | 0    | 0    | 0    | 0    |
| Fruit                           | 0    | 0.01 | 0    | 0    | 0    |
| Livestock                       | 0.01 | 0.03 | 0    | 0    | 0    |
| Oil crops                       | 0    | 0    | 0    | 0    | 0    |
| Pulses                          | 0    | 0    | 0    | 0    | 0    |
| Roots & tubers                  | 0.07 | 0.14 | 0.01 | 0    | 0    |
| Sugar crops                     | 0    | 0    | 0    | 0    | 0    |
| Vegetables                      | 0    | 0    | 0    | 0    | 0    |
| <b>Cameroon</b>                 |      |      |      |      |      |
| Cereals                         | 0.04 | 0.05 | 0    | 0.01 | 0    |
| Fiber                           | 0    | 0    | 0    | 0    | 0    |
| Fruit                           | 0.28 | 0.45 | 0.04 | 0.04 | 0    |
| Livestock                       | 0.05 | 0.07 | 0    | 0    | 0    |
| Oil crops                       | 0    | 0    | 0    | 0    | 0    |
| Pulses                          | 0    | 0    | 0    | 0    | 0    |
| Roots & tubers                  | 0.34 | 0.59 | 0.06 | 0.14 | 0    |
| Sugar crops                     | 0    | 0    | 0    | 0    | 0    |
| Vegetables                      | 0.08 | 0.11 | 0.01 | 0    | 0    |
| <b>Canada</b>                   |      |      |      |      |      |
| Cereals                         | 0    | 0.04 | 0.09 | 0.4  | 0.42 |
| Fiber                           | 0    | 0    | 0    | 0    | 0    |
| Fruit                           | 0    | 0    | 0    | 0.01 | 0    |
| Livestock                       | 0    | 0.49 | 0.75 | 1.52 | 0.84 |
| Oil crops                       | 0    | 0.01 | 0.02 | 0.05 | 0.05 |
| Pulses                          | 0    | 0.02 | 0.02 | 0.08 | 0.08 |
| Roots & tubers                  | 0    | 0    | 0    | 0    | 0    |
| Sugar crops                     | 0    | 0    | 0    | 0    | 0.01 |
| Vegetables                      | 0    | 0.03 | 0.05 | 0.16 | 0.08 |
| <b>Central African Republic</b> |      |      |      |      |      |
| Cereals                         | 0    | 0.01 | 0    | 0    | 0    |
| Fiber                           | 0    | 0    | 0    | 0    | 0    |
| Fruit                           | 0.01 | 0.02 | 0    | 0    | 0    |
| Oil crops                       | 0    | 0    | 0    | 0    | 0    |
| Pulses                          | 0    | 0    | 0    | 0    | 0    |
| Roots & tubers                  | 0.01 | 0.02 | 0    | 0    | 0    |
| Sugar crops                     | 0    | 0    | 0    | 0    | 0    |
| Vegetables                      | 0    | 0    | 0    | 0    | 0    |
| <b>Chad</b>                     |      |      |      |      |      |
| Cereals                         | 0    | 0.01 | 0    | 0.01 | 0    |

|                 |        |       |      |       |      |
|-----------------|--------|-------|------|-------|------|
| Fiber           | 0      | 0     | 0    | 0     | 0    |
| Fruit           | 0      | 0     | 0    | 0     | 0    |
| Livestock       | 0.03   | 0.05  | 0    | 0.01  | 0    |
| Oil crops       | 0      | 0     | 0    | 0     | 0    |
| Pulses          | 0      | 0     | 0    | 0     | 0    |
| Roots & tubers  | 0.13   | 0.21  | 0.02 | 0.08  | 0    |
| Sugar crops     | 0      | 0     | 0    | 0     | 0    |
| Vegetables      | 0      | 0     | 0    | 0     | 0    |
| <b>Chile</b>    |        |       |      |       |      |
| Cereals         | 0      | 0.01  | 0.01 | 0.02  | 0.06 |
| Fiber           | 0      | 0     | 0    | 0     | 0    |
| Fruit           | 0      | 0.01  | 0.01 | 0.02  | 0.07 |
| Livestock       | 0      | 0.07  | 0.09 | 0.24  | 0.76 |
| Oil crops       | 0      | 0     | 0    | 0     | 0    |
| Pulses          | 0      | 0     | 0    | 0     | 0    |
| Roots & tubers  | 0      | 0     | 0    | 0.01  | 0.03 |
| Sugar crops     | 0      | 0     | 0    | 0.01  | 0.02 |
| Vegetables      | 0      | 0.04  | 0.04 | 0.08  | 0.27 |
| <b>China</b>    |        |       |      |       |      |
| Cereals         | 5.64   | 3.98  | 0    | 2.94  | 0    |
| Fiber           | 0      | 0     | 0    | 0     | 0    |
| Fruit           | 0.95   | 0.4   | 0    | 0.21  | 0    |
| Livestock       | 33.1   | 13.77 | 0    | 5.69  | 0    |
| Oil crops       | 0.14   | 0.09  | 0    | 0.05  | 0    |
| Pulses          | 0.06   | 0.03  | 0    | 0.02  | 0    |
| Roots & tubers  | 320.96 | 91.56 | 0    | 29.62 | 0    |
| Sugar crops     | 0.04   | 0.05  | 0    | 0.04  | 0    |
| Vegetables      | 7.66   | 3.59  | 0    | 1.52  | 0    |
| <b>Colombia</b> |        |       |      |       |      |
| Cereals         | 0      | 0     | 0.01 | 0.02  | 0.11 |
| Fiber           | 0      | 0     | 0    | 0     | 0    |
| Fruit           | 0      | 0.08  | 0.1  | 0.25  | 0.77 |
| Livestock       | 0.02   | 0.38  | 0.37 | 0.64  | 1.74 |
| Oil crops       | 0      | 0     | 0    | 0     | 0    |
| Pulses          | 0      | 0     | 0    | 0     | 0    |
| Roots & tubers  | 0      | 0     | 0    | 0.01  | 0.02 |
| Sugar crops     | 0      | 0     | 0    | 0     | 0    |
| Vegetables      | 0      | 0.02  | 0.02 | 0.04  | 0.09 |
| <b>Congo</b>    |        |       |      |       |      |
| Cereals         | 0      | 0     | 0    | 0     | 0    |
| Fiber           | 0      | 0     | 0    | 0     | 0    |
| Fruit           | 0.01   | 0.02  | 0    | 0     | 0    |
| Livestock       | 0      | 0     | 0    | 0     | 0    |
| Oil crops       | 0      | 0     | 0    | 0     | 0    |
| Pulses          | 0      | 0     | 0    | 0     | 0    |
| Roots & tubers  | 0.01   | 0.02  | 0    | 0     | 0    |

|                       |      |      |      |      |      |
|-----------------------|------|------|------|------|------|
| Sugar crops           | 0    | 0    | 0    | 0    | 0    |
| Vegetables            | 0    | 0    | 0    | 0    | 0    |
| <b>Costa Rica</b>     |      |      |      |      |      |
| Cereals               | 0    | 0    | 0    | 0    | 0    |
| Fiber                 | 0    | 0    | 0    | 0    | 0    |
| Fruit                 | 0    | 0.01 | 0.03 | 0.03 | 0.05 |
| Livestock             | 0    | 0.02 | 0.08 | 0.09 | 0.17 |
| Oil crops             | 0    | 0    | 0    | 0    | 0    |
| Pulses                | 0    | 0    | 0    | 0    | 0    |
| Roots & tubers        | 0    | 0    | 0    | 0    | 0    |
| Sugar crops           | 0    | 0    | 0    | 0    | 0    |
| Vegetables            | 0    | 0    | 0    | 0    | 0.01 |
| <b>Croatia</b>        |      |      |      |      |      |
| Cereals               | 0.01 | 0.05 | 0.02 | 0.05 | 0.02 |
| Fiber                 | 0    | 0    | 0    | 0    | 0    |
| Fruit                 | 0    | 0    | 0    | 0    | 0    |
| Livestock             | 0.03 | 0.1  | 0.04 | 0.15 | 0.06 |
| Oil crops             | 0    | 0    | 0    | 0    | 0    |
| Pulses                | 0    | 0    | 0    | 0    | 0    |
| Roots & tubers        | 0    | 0    | 0    | 0    | 0    |
| Sugar crops           | 0    | 0.01 | 0    | 0.01 | 0    |
| Vegetables            | 0    | 0    | 0    | 0    | 0    |
| <b>Cuba</b>           |      |      |      |      |      |
| Cereals               | 0    | 0.01 | 0.01 | 0    | 0.01 |
| Fiber                 | 0    | 0    | 0    | 0    | 0    |
| Fruit                 | 0.02 | 0.06 | 0.06 | 0.05 | 0.08 |
| Livestock             | 0.01 | 0.04 | 0.07 | 0.06 | 0.1  |
| Oil crops             | 0    | 0    | 0    | 0    | 0    |
| Pulses                | 0    | 0    | 0    | 0    | 0    |
| Roots & tubers        | 0.21 | 0.48 | 0.46 | 0.33 | 0.52 |
| Sugar crops           | 0    | 0    | 0    | 0    | 0    |
| Vegetables            | 0.03 | 0.06 | 0.06 | 0.04 | 0.07 |
| <b>Cyprus</b>         |      |      |      |      |      |
| Cereals               | 0    | 0    | 0    | 0    | 0    |
| Fiber                 | 0    | 0    | 0    | 0    | 0    |
| Fruit                 | 0    | 0    | 0    | 0    | 0    |
| Livestock             | 0.01 | 0.05 | 0.02 | 0.01 | 0    |
| Oil crops             | 0    | 0    | 0    | 0    | 0    |
| Pulses                | 0    | 0    | 0    | 0    | 0    |
| Roots & tubers        | 0    | 0    | 0    | 0    | 0    |
| Sugar crops           | 0    | 0    | 0    | 0    | 0    |
| Vegetables            | 0    | 0    | 0    | 0    | 0    |
| <b>Czech Republic</b> |      |      |      |      |      |
| Cereals               | 0.01 | 0.03 | 0.01 | 0.03 | 0.01 |
| Fiber                 | 0    | 0    | 0    | 0    | 0    |
| Fruit                 | 0    | 0    | 0    | 0    | 0    |

|                                         |      |      |      |      |      |
|-----------------------------------------|------|------|------|------|------|
| Livestock                               | 0.07 | 0.29 | 0.15 | 0.51 | 0.19 |
| Oil crops                               | 0    | 0    | 0    | 0    | 0    |
| Pulses                                  | 0    | 0    | 0    | 0    | 0    |
| Roots & tubers                          | 0    | 0    | 0    | 0    | 0    |
| Sugar crops                             | 0    | 0.02 | 0.01 | 0.02 | 0.01 |
| Vegetables                              | 0    | 0    | 0    | 0    | 0    |
| <b>Democratic Republic of the Congo</b> |      |      |      |      |      |
| Cereals                                 | 0.03 | 0.05 | 0.01 | 0.01 | 0    |
| Fiber                                   | 0    | 0    | 0    | 0    | 0    |
| Fruit                                   | 0.15 | 0.23 | 0.02 | 0.07 | 0    |
| Livestock                               | 0    | 0.01 | 0    | 0    | 0    |
| Oil crops                               | 0    | 0    | 0    | 0    | 0    |
| Pulses                                  | 0    | 0    | 0    | 0    | 0    |
| Roots & tubers                          | 0.39 | 0.64 | 0.06 | 0.23 | 0    |
| Sugar crops                             | 0    | 0    | 0    | 0    | 0    |
| Vegetables                              | 0    | 0.01 | 0    | 0    | 0    |
| <b>Denmark</b>                          |      |      |      |      |      |
| Cereals                                 | 0    | 0.01 | 0.01 | 0.02 | 0.01 |
| Fiber                                   | 0    | 0    | 0    | 0    | 0    |
| Fruit                                   | 0    | 0    | 0    | 0    | 0    |
| Livestock                               | 0.05 | 0.38 | 0.29 | 0.78 | 0.21 |
| Oil crops                               | 0    | 0    | 0    | 0    | 0    |
| Pulses                                  | 0    | 0    | 0    | 0    | 0    |
| Roots & tubers                          | 0    | 0    | 0    | 0    | 0    |
| Sugar crops                             | 0    | 0.01 | 0.01 | 0.02 | 0.01 |
| Vegetables                              | 0    | 0    | 0    | 0    | 0    |
| <b>Djibouti</b>                         |      |      |      |      |      |
| Cereals                                 | 0    | 0    | 0    | 0    | 0    |
| Fiber                                   | 0    | 0    | 0    | 0    | 0    |
| Fruit                                   | 0    | 0    | 0    | 0    | 0    |
| Livestock                               | 0    | 0    | 0    | 0    | 0    |
| Oil crops                               | 0    | 0    | 0    | 0    | 0    |
| Pulses                                  | 0    | 0    | 0    | 0    | 0    |
| Roots & tubers                          | 0    | 0    | 0    | 0    | 0    |
| Sugar crops                             | 0    | 0    | 0    | 0    | 0    |
| Vegetables                              | 0    | 0    | 0    | 0    | 0    |
| <b>Dominica</b>                         |      |      |      |      |      |
| Cereals                                 | 0    | 0    | 0    | 0    | 0    |
| Fiber                                   | 0    | 0    | 0    | 0    | 0    |
| Fruit                                   | 0    | 0    | 0    | 0    | 0    |
| Livestock                               | 0    | 0    | 0    | 0    | 0    |
| Oil crops                               | 0    | 0    | 0    | 0    | 0    |
| Pulses                                  | 0    | 0    | 0    | 0    | 0    |
| Roots & tubers                          | 0    | 0    | 0    | 0    | 0    |
| Sugar crops                             | 0    | 0    | 0    | 0    | 0    |

|                          |      |      |      |      |      |
|--------------------------|------|------|------|------|------|
| Vegetables               | 0    | 0    | 0    | 0    | 0    |
| <b>Ecuador</b>           |      |      |      |      |      |
| Cereals                  | 0    | 0.01 | 0.01 | 0.02 | 0.03 |
| Fiber                    | 0    | 0    | 0    | 0    | 0    |
| Fruit                    | 0    | 0.05 | 0.04 | 0.08 | 0.18 |
| Livestock                | 0.02 | 0.26 | 0.25 | 0.39 | 0.9  |
| Oil crops                | 0    | 0    | 0    | 0    | 0    |
| Pulses                   | 0    | 0    | 0    | 0    | 0    |
| Roots & tubers           | 0    | 0    | 0    | 0    | 0.01 |
| Sugar crops              | 0    | 0    | 0    | 0    | 0    |
| Vegetables               | 0    | 0.01 | 0.01 | 0.01 | 0.01 |
| <b>Egypt</b>             |      |      |      |      |      |
| Cereals                  | 0.07 | 0.31 | 0.12 | 0.06 | 0.01 |
| Fiber                    | 0    | 0    | 0    | 0    | 0    |
| Fruit                    | 0.04 | 0.18 | 0.07 | 0.03 | 0.01 |
| Livestock                | 0.28 | 1.31 | 0.49 | 0.24 | 0.04 |
| Oil crops                | 0.01 | 0.04 | 0.01 | 0.01 | 0    |
| Pulses                   | 0    | 0    | 0    | 0    | 0    |
| Roots & tubers           | 0.22 | 1.01 | 0.37 | 0.18 | 0.03 |
| Sugar crops              | 0.01 | 0.04 | 0.01 | 0.01 | 0    |
| Vegetables               | 0.38 | 1.76 | 0.65 | 0.32 | 0.06 |
| <b>El Salvador</b>       |      |      |      |      |      |
| Cereals                  | 0.01 | 0.02 | 0.02 | 0.01 | 0    |
| Fiber                    | 0    | 0    | 0    | 0    | 0    |
| Fruit                    | 0.01 | 0.01 | 0.01 | 0    | 0    |
| Livestock                | 0.04 | 0.09 | 0.1  | 0.04 | 0.02 |
| Oil crops                | 0    | 0    | 0    | 0    | 0    |
| Pulses                   | 0    | 0    | 0    | 0    | 0    |
| Roots & tubers           | 0    | 0    | 0    | 0    | 0    |
| Sugar crops              | 0    | 0    | 0    | 0    | 0    |
| Vegetables               | 0    | 0.01 | 0    | 0    | 0    |
| <b>Equatorial Guinea</b> |      |      |      |      |      |
| Cereals                  | 0    | 0    | 0    | 0    | 0    |
| Fiber                    | 0    | 0    | 0    | 0    | 0    |
| Fruit                    | 0.01 | 0.01 | 0    | 0    | 0    |
| Livestock                | 0    | 0    | 0    | 0    | 0    |
| Oil crops                | 0    | 0    | 0    | 0    | 0    |
| Pulses                   | 0    | 0    | 0    | 0    | 0    |
| Roots & tubers           | 0.16 | 0.2  | 0.01 | 0    | 0    |
| Sugar crops              | 0    | 0    | 0    | 0    | 0    |
| Vegetables               | 0    | 0    | 0    | 0    | 0    |
| <b>Eritrea</b>           |      |      |      |      |      |
| Cereals                  | 0    | 0    | 0    | 0    | 0    |
| Fiber                    | 0    | 0    | 0    | 0    | 0    |
| Fruit                    | 0    | 0    | 0    | 0    | 0    |
| Livestock                | 0.01 | 0.03 | 0    | 0    | 0    |

|                 |      |      |      |      |      |
|-----------------|------|------|------|------|------|
| Oil crops       | 0    | 0    | 0    | 0    | 0    |
| Pulses          | 0    | 0    | 0    | 0    | 0    |
| Roots & tubers  | 0    | 0    | 0    | 0    | 0    |
| Sugar crops     | 0    | 0    | 0    | 0    | 0    |
| Vegetables      | 0    | 0    | 0    | 0    | 0    |
| <b>Estonia</b>  |      |      |      |      |      |
| Cereals         | 0    | 0    | 0    | 0    | 0    |
| Fiber           | 0    | 0    | 0    | 0    | 0    |
| Fruit           | 0    | 0    | 0    | 0    | 0    |
| Livestock       | 0    | 0.03 | 0.03 | 0.13 | 0.05 |
| Oil crops       | 0    | 0    | 0    | 0    | 0    |
| Pulses          | 0    | 0    | 0    | 0    | 0    |
| Roots & tubers  | 0    | 0    | 0    | 0    | 0    |
| Sugar crops     | 0    | 0    | 0    | 0    | 0    |
| Vegetables      | 0    | 0    | 0    | 0    | 0    |
| <b>Ethiopia</b> |      |      |      |      |      |
| Cereals         | 0.14 | 0.19 | 0.01 | 0    | 0    |
| Fiber           | 0    | 0    | 0    | 0    | 0    |
| Fruit           | 0    | 0    | 0    | 0    | 0    |
| Livestock       | 0.32 | 0.52 | 0.05 | 0    | 0    |
| Oil crops       | 0    | 0    | 0    | 0    | 0    |
| Pulses          | 0.01 | 0.01 | 0    | 0    | 0    |
| Roots & tubers  | 0.66 | 1.25 | 0.13 | 0.22 | 0    |
| Sugar crops     | 0    | 0    | 0    | 0    | 0    |
| Vegetables      | 0    | 0.01 | 0    | 0    | 0    |
| <b>Finland</b>  |      |      |      |      |      |
| Cereals         | 0    | 0    | 0    | 0.01 | 0    |
| Fiber           | 0    | 0    | 0    | 0    | 0    |
| Fruit           | 0    | 0    | 0    | 0    | 0    |
| Livestock       | 0.04 | 0.25 | 0.16 | 0.38 | 0.08 |
| Oil crops       | 0    | 0    | 0    | 0    | 0    |
| Pulses          | 0    | 0    | 0    | 0    | 0    |
| Roots & tubers  | 0    | 0    | 0    | 0    | 0    |
| Sugar crops     | 0    | 0    | 0    | 0.01 | 0    |
| Vegetables      | 0    | 0    | 0    | 0.01 | 0    |
| <b>France</b>   |      |      |      |      |      |
| Cereals         | 0.09 | 0.37 | 0.18 | 0.48 | 0.14 |
| Fiber           | 0    | 0    | 0    | 0    | 0    |
| Fruit           | 0.01 | 0.07 | 0.04 | 0.1  | 0.03 |
| Livestock       | 0.87 | 3.46 | 1.58 | 3.59 | 0.82 |
| Oil crops       | 0    | 0.01 | 0.01 | 0.03 | 0.01 |
| Pulses          | 0    | 0.02 | 0.01 | 0.03 | 0.01 |
| Roots & tubers  | 0    | 0    | 0    | 0    | 0    |
| Sugar crops     | 0    | 0.04 | 0.04 | 0.27 | 0.13 |
| Vegetables      | 0.01 | 0.06 | 0.03 | 0.11 | 0.04 |
| <b>Gabon</b>    |      |      |      |      |      |

|                |      |      |      |      |      |
|----------------|------|------|------|------|------|
| Cereals        | 0    | 0    | 0    | 0    | 0    |
| Fiber          | 0    | 0    | 0    | 0    | 0    |
| Fruit          | 0.04 | 0.05 | 0    | 0    | 0    |
| Livestock      | 0    | 0    | 0    | 0    | 0    |
| Oil crops      | 0    | 0    | 0    | 0    | 0    |
| Pulses         | 0    | 0    | 0    | 0    | 0    |
| Roots & tubers | 0.01 | 0.02 | 0    | 0    | 0    |
| Sugar crops    | 0    | 0    | 0    | 0    | 0    |
| Vegetables     | 0    | 0    | 0    | 0    | 0    |
| <b>Gambia</b>  |      |      |      |      |      |
| Cereals        | 0    | 0    | 0    | 0    | 0    |
| Fiber          | 0    | 0    | 0    | 0    | 0    |
| Fruit          | 0    | 0    | 0    | 0    | 0    |
| Livestock      | 0    | 0    | 0    | 0    | 0    |
| Oil crops      | 0    | 0    | 0    | 0    | 0    |
| Pulses         | 0    | 0    | 0    | 0    | 0    |
| Roots & tubers | 0    | 0    | 0    | 0    | 0    |
| Sugar crops    | 0    | 0    | 0    | 0    | 0    |
| Vegetables     | 0    | 0    | 0    | 0    | 0    |
| <b>Georgia</b> |      |      |      |      |      |
| Cereals        | 0    | 0.02 | 0.01 | 0    | 0    |
| Fiber          | 0    | 0    | 0    | 0    | 0    |
| Fruit          | 0    | 0    | 0    | 0    | 0    |
| Livestock      | 0.03 | 0.15 | 0.05 | 0.03 | 0    |
| Oil crops      | 0    | 0    | 0    | 0    | 0    |
| Pulses         | 0    | 0    | 0    | 0    | 0    |
| Roots & tubers | 0    | 0    | 0    | 0    | 0    |
| Sugar crops    | 0    | 0    | 0    | 0    | 0    |
| Vegetables     | 0    | 0.02 | 0.01 | 0    | 0    |
| <b>Germany</b> |      |      |      |      |      |
| Cereals        | 0.05 | 0.16 | 0.05 | 0.15 | 0.05 |
| Fiber          | 0    | 0    | 0    | 0    | 0    |
| Fruit          | 0.01 | 0.03 | 0.01 | 0.02 | 0    |
| Livestock      | 0.35 | 1.99 | 1.29 | 5.15 | 2.08 |
| Oil crops      | 0    | 0.01 | 0.01 | 0.02 | 0.01 |
| Pulses         | 0    | 0    | 0    | 0.01 | 0    |
| Roots & tubers | 0    | 0    | 0    | 0    | 0    |
| Sugar crops    | 0.01 | 0.08 | 0.06 | 0.17 | 0.05 |
| Vegetables     | 0    | 0.01 | 0    | 0.01 | 0    |
| <b>Ghana</b>   |      |      |      |      |      |
| Cereals        | 0.04 | 0.06 | 0    | 0    | 0    |
| Fiber          | 0    | 0    | 0    | 0    | 0    |
| Fruit          | 0.45 | 0.62 | 0.05 | 0    | 0    |
| Livestock      | 0.02 | 0.04 | 0    | 0    | 0    |
| Oil crops      | 0    | 0    | 0    | 0    | 0    |
| Pulses         | 0    | 0    | 0    | 0    | 0    |

|                      |      |      |      |      |      |
|----------------------|------|------|------|------|------|
| Roots & tubers       | 0.31 | 0.48 | 0.04 | 0    | 0    |
| Sugar crops          | 0    | 0    | 0    | 0    | 0    |
| Vegetables           | 0.03 | 0.04 | 0    | 0    | 0    |
| <b>Greece</b>        |      |      |      |      |      |
| Cereals              | 0.02 | 0.08 | 0.04 | 0.06 | 0.01 |
| Fiber                | 0    | 0    | 0    | 0    | 0    |
| Fruit                | 0.01 | 0.05 | 0.02 | 0.03 | 0    |
| Livestock            | 0.13 | 0.49 | 0.18 | 0.26 | 0.02 |
| Oil crops            | 0.04 | 0.17 | 0.07 | 0.1  | 0.01 |
| Pulses               | 0    | 0    | 0    | 0    | 0    |
| Roots & tubers       | 0    | 0.01 | 0    | 0.01 | 0    |
| Sugar crops          | 0    | 0.01 | 0    | 0.01 | 0    |
| Vegetables           | 0.07 | 0.26 | 0.1  | 0.16 | 0.02 |
| <b>Grenada</b>       |      |      |      |      |      |
| Cereals              | 0    | 0    | 0    | 0    | 0    |
| Fiber                | 0    | 0    | 0    | 0    | 0    |
| Fruit                | 0    | 0    | 0    | 0    | 0    |
| Livestock            | 0    | 0    | 0    | 0    | 0    |
| Oil crops            | 0    | 0    | 0    | 0    | 0    |
| Pulses               | 0    | 0    | 0    | 0    | 0    |
| Roots & tubers       | 0    | 0    | 0    | 0    | 0    |
| Sugar crops          | 0    | 0    | 0    | 0    | 0    |
| Vegetables           | 0    | 0    | 0    | 0    | 0    |
| <b>Guatemala</b>     |      |      |      |      |      |
| Cereals              | 0.01 | 0.02 | 0.03 | 0.02 | 0.03 |
| Fiber                | 0    | 0    | 0    | 0    | 0    |
| Fruit                | 0.01 | 0.02 | 0.04 | 0.03 | 0.03 |
| Livestock            | 0.04 | 0.11 | 0.16 | 0.09 | 0.08 |
| Oil crops            | 0    | 0    | 0    | 0    | 0    |
| Pulses               | 0    | 0    | 0    | 0    | 0    |
| Roots & tubers       | 0    | 0    | 0    | 0    | 0    |
| Sugar crops          | 0    | 0    | 0    | 0    | 0    |
| Vegetables           | 0.01 | 0.02 | 0.04 | 0.02 | 0.03 |
| <b>Guinea</b>        |      |      |      |      |      |
| Cereals              | 0.01 | 0.03 | 0    | 0    | 0    |
| Fiber                | 0    | 0    | 0    | 0    | 0    |
| Fruit                | 0.05 | 0.11 | 0.01 | 0    | 0    |
| Livestock            | 0.03 | 0.04 | 0    | 0    | 0    |
| Oil crops            | 0    | 0    | 0    | 0    | 0    |
| Pulses               | 0    | 0.01 | 0    | 0    | 0    |
| Roots & tubers       | 0.3  | 0.63 | 0.07 | 0    | 0    |
| Sugar crops          | 0    | 0    | 0    | 0    | 0    |
| Vegetables           | 0    | 0    | 0    | 0    | 0    |
| <b>Guinea-Bissau</b> |      |      |      |      |      |
| Cereals              | 0    | 0    | 0    | 0    | 0    |
| Fiber                | 0    | 0    | 0    | 0    | 0    |



|                 |      |      |      |      |      |
|-----------------|------|------|------|------|------|
| Fruit           | 0.01 | 0.01 | 0    | 0    | 0    |
| Livestock       | 0    | 0.01 | 0    | 0    | 0    |
| Oil crops       | 0    | 0    | 0    | 0    | 0    |
| Pulses          | 0    | 0    | 0    | 0    | 0    |
| Roots & tubers  | 0    | 0    | 0    | 0    | 0    |
| Sugar crops     | 0    | 0    | 0    | 0    | 0    |
| Vegetables      | 0    | 0    | 0    | 0    | 0    |
| <b>Guyana</b>   |      |      |      |      |      |
| Cereals         | 0    | 0    | 0    | 0    | 0    |
| Fiber           | 0    | 0    | 0    | 0    | 0    |
| Fruit           | 0    | 0    | 0    | 0    | 0    |
| Livestock       | 0    | 0    | 0    | 0    | 0.01 |
| Oil crops       | 0    | 0    | 0    | 0    | 0    |
| Pulses          | 0    | 0    | 0    | 0    | 0    |
| Roots & tubers  | 0    | 0    | 0    | 0    | 0.01 |
| Sugar crops     | 0    | 0    | 0    | 0    | 0    |
| Vegetables      | 0    | 0    | 0    | 0    | 0    |
| <b>Haiti</b>    |      |      |      |      |      |
| Cereals         | 0    | 0.01 | 0.01 | 0    | 0    |
| Fiber           | 0    | 0    | 0    | 0    | 0    |
| Fruit           | 0.02 | 0.04 | 0.03 | 0.01 | 0.01 |
| Livestock       | 0.01 | 0.01 | 0.01 | 0.01 | 0    |
| Oil crops       | 0    | 0    | 0    | 0    | 0    |
| Pulses          | 0    | 0    | 0    | 0    | 0    |
| Roots & tubers  | 0.17 | 0.37 | 0.33 | 0.14 | 0.06 |
| Sugar crops     | 0    | 0    | 0    | 0    | 0    |
| Vegetables      | 0    | 0    | 0    | 0    | 0    |
| <b>Honduras</b> |      |      |      |      |      |
| Cereals         | 0    | 0.01 | 0.01 | 0.01 | 0.02 |
| Fiber           | 0    | 0    | 0    | 0    | 0    |
| Fruit           | 0.01 | 0.01 | 0.01 | 0.01 | 0.03 |
| Livestock       | 0.04 | 0.08 | 0.05 | 0.05 | 0.13 |
| Oil crops       | 0    | 0    | 0    | 0    | 0    |
| Pulses          | 0    | 0    | 0    | 0    | 0    |
| Roots & tubers  | 0    | 0.01 | 0    | 0    | 0.01 |
| Sugar crops     | 0    | 0    | 0    | 0    | 0    |
| Vegetables      | 0.01 | 0.01 | 0.01 | 0.01 | 0.02 |
| <b>Hungary</b>  |      |      |      |      |      |
| Cereals         | 0.05 | 0.19 | 0.08 | 0.22 | 0.07 |
| Fiber           | 0    | 0    | 0    | 0    | 0    |
| Fruit           | 0    | 0.01 | 0    | 0.01 | 0    |
| Livestock       | 0.06 | 0.29 | 0.15 | 0.39 | 0.11 |
| Oil crops       | 0    | 0.01 | 0    | 0.01 | 0    |
| Pulses          | 0    | 0    | 0    | 0    | 0    |
| Roots & tubers  | 0    | 0    | 0    | 0    | 0    |
| Sugar crops     | 0    | 0.01 | 0.01 | 0.01 | 0    |

|                                   |       |       |      |      |      |
|-----------------------------------|-------|-------|------|------|------|
| Vegetables                        | 0.01  | 0.03  | 0.01 | 0.02 | 0.01 |
| <b>Iceland</b>                    |       |       |      |      |      |
| Cereals                           | 0     | 0     | 0    | 0    | 0    |
| Fiber                             | 0     | 0     | 0    | 0    | 0    |
| Fruit                             | 0     | 0     | 0    | 0    | 0    |
| Livestock                         | 0     | 0     | 0    | 0    | 0    |
| Oil crops                         | 0     | 0     | 0    | 0    | 0    |
| Pulses                            | 0     | 0     | 0    | 0    | 0    |
| Roots & tubers                    | 0     | 0     | 0    | 0    | 0    |
| Sugar crops                       | 0     | 0     | 0    | 0    | 0    |
| Vegetables                        | 0     | 0     | 0    | 0    | 0    |
| <b>India</b>                      |       |       |      |      |      |
| Cereals                           | 0.43  | 0.84  | 0.1  | 0.02 | 0    |
| Fiber                             | 0     | 0     | 0    | 0    | 0    |
| Fruit                             | 0.24  | 0.54  | 0.07 | 0.01 | 0    |
| Livestock                         | 11.02 | 24.01 | 2.95 | 0.57 | 0    |
| Oil crops                         | 0.05  | 0.12  | 0.02 | 0    | 0    |
| Pulses                            | 0.05  | 0.12  | 0.02 | 0    | 0    |
| Roots & tubers                    | 1.78  | 3.44  | 0.4  | 0.08 | 0    |
| Sugar crops                       | 0     | 0     | 0    | 0    | 0    |
| Vegetables                        | 1.43  | 2.01  | 0.18 | 0.04 | 0    |
| <b>Indonesia</b>                  |       |       |      |      |      |
| Cereals                           | 0.42  | 0.58  | 0.02 | 0.04 | 0    |
| Fiber                             | 0     | 0     | 0    | 0    | 0    |
| Fruit                             | 0.08  | 0.15  | 0.01 | 0.08 | 0    |
| Livestock                         | 1.03  | 1.36  | 0.04 | 0.04 | 0    |
| Oil crops                         | 0     | 0     | 0    | 0    | 0    |
| Pulses                            | 0     | 0     | 0    | 0    | 0    |
| Roots & tubers                    | 3.17  | 4.42  | 0.15 | 1.95 | 0    |
| Sugar crops                       | 0     | 0     | 0    | 0    | 0    |
| Vegetables                        | 0.06  | 0.11  | 0.01 | 0.06 | 0    |
| <b>Iran (Islamic Republic of)</b> |       |       |      |      |      |
| Cereals                           | 0.05  | 0.11  | 0.01 | 0.04 | 0    |
| Fiber                             | 0     | 0     | 0    | 0    | 0    |
| Fruit                             | 0.1   | 0.22  | 0.03 | 0.08 | 0    |
| Livestock                         | 0.66  | 2.16  | 0.3  | 0.9  | 0    |
| Oil crops                         | 0     | 0.01  | 0    | 0    | 0    |
| Pulses                            | 0     | 0     | 0    | 0    | 0    |
| Roots & tubers                    | 0     | 0     | 0    | 0    | 0    |
| Sugar crops                       | 0.01  | 0.05  | 0.01 | 0.02 | 0    |
| Vegetables                        | 0.45  | 0.99  | 0.12 | 0.4  | 0    |
| <b>Iraq</b>                       |       |       |      |      |      |
| Cereals                           | 0.01  | 0.02  | 0.01 | 0    | 0    |
| Fiber                             | 0     | 0     | 0    | 0    | 0    |
| Fruit                             | 0     | 0.02  | 0.01 | 0    | 0    |
| Livestock                         | 0.02  | 0.1   | 0.03 | 0.02 | 0.02 |

|                    |      |      |      |      |      |
|--------------------|------|------|------|------|------|
| Oil crops          | 0    | 0    | 0    | 0    | 0    |
| Pulses             | 0    | 0    | 0    | 0    | 0    |
| Roots & tubers     | 0    | 0    | 0    | 0    | 0    |
| Sugar crops        | 0    | 0    | 0    | 0    | 0    |
| Vegetables         | 0.04 | 0.21 | 0.08 | 0.04 | 0.01 |
| <b>Ireland</b>     |      |      |      |      |      |
| Cereals            | 0    | 0    | 0    | 0.01 | 0    |
| Fiber              | 0    | 0    | 0    | 0    | 0    |
| Fruit              | 0    | 0    | 0    | 0    | 0    |
| Livestock          | 0.16 | 0.68 | 0.33 | 0.63 | 0.09 |
| Oil crops          | 0    | 0    | 0    | 0    | 0    |
| Pulses             | 0    | 0    | 0    | 0    | 0    |
| Roots & tubers     | 0    | 0    | 0    | 0    | 0    |
| Sugar crops        | 0    | 0    | 0    | 0.01 | 0    |
| Vegetables         | 0    | 0    | 0    | 0    | 0    |
| <b>Israel</b>      |      |      |      |      |      |
| Cereals            | 0    | 0.01 | 0    | 0    | 0    |
| Fiber              | 0    | 0    | 0    | 0    | 0    |
| Fruit              | 0.02 | 0.1  | 0.03 | 0.02 | 0    |
| Livestock          | 0.19 | 0.79 | 0.27 | 0.13 | 0.02 |
| Oil crops          | 0    | 0.01 | 0    | 0    | 0    |
| Pulses             | 0    | 0    | 0    | 0    | 0    |
| Roots & tubers     | 0.04 | 0.16 | 0.05 | 0.03 | 0    |
| Sugar crops        | 0    | 0    | 0    | 0    | 0    |
| Vegetables         | 0.04 | 0.19 | 0.07 | 0.03 | 0.01 |
| <b>Italy</b>       |      |      |      |      |      |
| Cereals            | 0.03 | 0.23 | 0.18 | 0.37 | 0.05 |
| Fiber              | 0    | 0    | 0    | 0    | 0    |
| Fruit              | 0.02 | 0.11 | 0.07 | 0.22 | 0.07 |
| Livestock          | 0.25 | 1.55 | 1.04 | 2.16 | 0.31 |
| Oil crops          | 0.04 | 0.14 | 0.04 | 0.22 | 0.12 |
| Pulses             | 0    | 0    | 0    | 0    | 0    |
| Roots & tubers     | 0    | 0.02 | 0.01 | 0.03 | 0.01 |
| Sugar crops        | 0    | 0.03 | 0.02 | 0.05 | 0.01 |
| Vegetables         | 0.12 | 0.67 | 0.41 | 1.07 | 0.28 |
| <b>Ivory Coast</b> |      |      |      |      |      |
| Cereals            | 0    | 0    | 0    | 0    | 0    |
| Fiber              | 0    | 0    | 0    | 0    | 0    |
| Fruit              | 0    | 0    | 0    | 0    | 0    |
| Livestock          | 0    | 0.04 | 0.01 | 0    | 0    |
| Oil crops          | 0    | 0    | 0    | 0    | 0    |
| Pulses             | 0    | 0    | 0    | 0    | 0    |
| Roots & tubers     | 0    | 0    | 0    | 0    | 0    |
| Sugar crops        | 0    | 0    | 0    | 0    | 0    |
| Vegetables         | 0    | 0    | 0    | 0    | 0    |
| <b>Jamaica</b>     |      |      |      |      |      |

|                   |      |      |      |      |      |
|-------------------|------|------|------|------|------|
| Cereals           | 0    | 0    | 0    | 0    | 0    |
| Fiber             | 0    | 0    | 0    | 0    | 0    |
| Fruit             | 0.01 | 0.01 | 0    | 0    | 0    |
| Livestock         | 0.04 | 0.07 | 0.01 | 0.01 | 0    |
| Oil crops         | 0    | 0    | 0    | 0    | 0    |
| Pulses            | 0    | 0    | 0    | 0    | 0    |
| Roots & tubers    | 0.05 | 0.08 | 0.01 | 0    | 0    |
| Sugar crops       | 0    | 0    | 0    | 0    | 0    |
| Vegetables        | 0    | 0    | 0    | 0    | 0    |
| <b>Japan</b>      |      |      |      |      |      |
| Cereals           | 0    | 0    | 0    | 0    | 0    |
| Fiber             | 0    | 0    | 0    | 0    | 0    |
| Fruit             | 0.01 | 0.01 | 0.01 | 0    | 0    |
| Livestock         | 2.82 | 2.29 | 0.7  | 0.86 | 0    |
| Oil crops         | 0    | 0    | 0    | 0    | 0    |
| Pulses            | 0    | 0    | 0    | 0    | 0    |
| Roots & tubers    | 3.19 | 1.6  | 0.27 | 0.08 | 0    |
| Sugar crops       | 0.02 | 0.03 | 0.01 | 0.01 | 0    |
| Vegetables        | 0.08 | 0.12 | 0.05 | 0.04 | 0    |
| <b>Jordan</b>     |      |      |      |      |      |
| Cereals           | 0    | 0    | 0    | 0    | 0    |
| Fiber             | 0    | 0    | 0    | 0    | 0    |
| Fruit             | 0    | 0    | 0    | 0    | 0    |
| Livestock         | 0.03 | 0.12 | 0.04 | 0.02 | 0    |
| Oil crops         | 0    | 0.01 | 0    | 0    | 0    |
| Pulses            | 0    | 0    | 0    | 0    | 0    |
| Roots & tubers    | 0    | 0    | 0    | 0    | 0    |
| Sugar crops       | 0    | 0    | 0    | 0    | 0    |
| Vegetables        | 0.02 | 0.11 | 0.04 | 0.02 | 0    |
| <b>Kazakhstan</b> |      |      |      |      |      |
| Cereals           | 0    | 0.03 | 0.01 | 0.01 | 0.01 |
| Fiber             | 0    | 0    | 0    | 0    | 0    |
| Fruit             | 0    | 0    | 0    | 0    | 0    |
| Livestock         | 0.11 | 0.75 | 0.32 | 0.31 | 0.37 |
| Oil crops         | 0    | 0    | 0    | 0    | 0    |
| Pulses            | 0    | 0    | 0    | 0    | 0    |
| Roots & tubers    | 0    | 0    | 0    | 0    | 0    |
| Sugar crops       | 0    | 0    | 0    | 0    | 0    |
| Vegetables        | 0.01 | 0.09 | 0.04 | 0.03 | 0.02 |
| <b>Kenya</b>      |      |      |      |      |      |
| Cereals           | 0.06 | 0.13 | 0.01 | 0.05 | 0    |
| Fiber             | 0    | 0    | 0    | 0    | 0    |
| Fruit             | 0.01 | 0.02 | 0    | 0.01 | 0    |
| Livestock         | 0.32 | 0.69 | 0.08 | 0.26 | 0    |
| Oil crops         | 0    | 0    | 0    | 0    | 0    |
| Pulses            | 0    | 0    | 0    | 0    | 0    |

|                                         |      |      |      |      |      |
|-----------------------------------------|------|------|------|------|------|
| Roots & tubers                          | 0.87 | 1.88 | 0.22 | 0.8  | 0    |
| Sugar crops                             | 0    | 0    | 0    | 0    | 0    |
| Vegetables                              | 0.05 | 0.1  | 0.01 | 0.05 | 0    |
| <b>Kuwait</b>                           |      |      |      |      |      |
| Cereals                                 | 0    | 0    | 0    | 0    | 0    |
| Fiber                                   | 0    | 0    | 0    | 0    | 0    |
| Fruit                                   | 0    | 0    | 0    | 0    | 0    |
| Livestock                               | 0    | 0.03 | 0.02 | 0.01 | 0    |
| Oil crops                               | 0    | 0    | 0    | 0    | 0    |
| Pulses                                  | 0    | 0    | 0    | 0    | 0    |
| Roots & tubers                          | 0    | 0    | 0    | 0    | 0    |
| Sugar crops                             | 0    | 0    | 0    | 0    | 0    |
| Vegetables                              | 0    | 0.01 | 0.01 | 0    | 0    |
| <b>Kyrgyzstan</b>                       |      |      |      |      |      |
| Cereals                                 | 0    | 0.01 | 0.01 | 0.01 | 0.01 |
| Fiber                                   | 0    | 0    | 0    | 0    | 0    |
| Fruit                                   | 0    | 0    | 0    | 0    | 0    |
| Livestock                               | 0.06 | 0.22 | 0.06 | 0.05 | 0.04 |
| Oil crops                               | 0    | 0    | 0    | 0    | 0    |
| Pulses                                  | 0    | 0    | 0    | 0    | 0    |
| Roots & tubers                          | 0    | 0    | 0    | 0    | 0    |
| Sugar crops                             | 0    | 0    | 0    | 0    | 0    |
| Vegetables                              | 0    | 0.03 | 0.01 | 0.01 | 0.02 |
| <b>Lao People's Democratic Republic</b> |      |      |      |      |      |
| Cereals                                 | 0.01 | 0.03 | 0    | 0    | 0    |
| Fiber                                   | 0    | 0    | 0    | 0    | 0    |
| Fruit                                   | 0    | 0.01 | 0    | 0    | 0    |
| Livestock                               | 0.01 | 0.02 | 0    | 0    | 0    |
| Oil crops                               | 0    | 0    | 0    | 0    | 0    |
| Pulses                                  | 0    | 0    | 0    | 0    | 0    |
| Roots & tubers                          | 0.19 | 0.4  | 0.02 | 0.01 | 0    |
| Sugar crops                             | 0    | 0    | 0    | 0    | 0    |
| Vegetables                              | 0    | 0    | 0    | 0    | 0    |
| <b>Latvia</b>                           |      |      |      |      |      |
| Cereals                                 | 0    | 0    | 0    | 0    | 0    |
| Fiber                                   | 0    | 0    | 0    | 0    | 0    |
| Fruit                                   | 0    | 0    | 0    | 0    | 0    |
| Livestock                               | 0.01 | 0.06 | 0.04 | 0.16 | 0.06 |
| Oil crops                               | 0    | 0    | 0    | 0    | 0    |
| Pulses                                  | 0    | 0    | 0    | 0    | 0    |
| Roots & tubers                          | 0    | 0    | 0    | 0    | 0    |
| Sugar crops                             | 0    | 0    | 0    | 0    | 0    |
| Vegetables                              | 0    | 0    | 0    | 0    | 0    |
| <b>Lebanon</b>                          |      |      |      |      |      |
| Cereals                                 | 0    | 0    | 0    | 0    | 0    |

|                  |      |      |      |      |      |
|------------------|------|------|------|------|------|
| Fiber            | 0    | 0    | 0    | 0    | 0    |
| Fruit            | 0    | 0.01 | 0    | 0    | 0.01 |
| Livestock        | 0.01 | 0.05 | 0.02 | 0.04 | 0.07 |
| Oil crops        | 0    | 0.01 | 0    | 0    | 0    |
| Pulses           | 0    | 0    | 0    | 0    | 0    |
| Roots & tubers   | 0    | 0    | 0    | 0    | 0    |
| Sugar crops      | 0    | 0    | 0    | 0    | 0    |
| Vegetables       | 0.01 | 0.05 | 0.02 | 0.02 | 0.02 |
| <b>Lesotho</b>   |      |      |      |      |      |
| Cereals          | 0    | 0    | 0    | 0    | 0    |
| Fiber            | 0    | 0    | 0    | 0    | 0    |
| Fruit            | 0    | 0    | 0    | 0    | 0    |
| Livestock        | 0    | 0.01 | 0    | 0    | 0    |
| Oil crops        | 0    | 0    | 0    | 0    | 0    |
| Pulses           | 0    | 0    | 0    | 0    | 0    |
| Roots & tubers   | 0    | 0    | 0    | 0    | 0    |
| Sugar crops      | 0    | 0    | 0    | 0    | 0    |
| Vegetables       | 0    | 0    | 0    | 0    | 0    |
| <b>Liberia</b>   |      |      |      |      |      |
| Cereals          | 0    | 0    | 0    | 0    | 0    |
| Fiber            | 0    | 0    | 0    | 0    | 0    |
| Fruit            | 0    | 0.01 | 0    | 0    | 0    |
| Livestock        | 0    | 0.01 | 0    | 0    | 0    |
| Oil crops        | 0    | 0    | 0    | 0    | 0    |
| Pulses           | 0    | 0    | 0    | 0    | 0    |
| Roots & tubers   | 0.02 | 0.07 | 0.01 | 0    | 0    |
| Sugar crops      | 0    | 0    | 0    | 0    | 0    |
| Vegetables       | 0    | 0    | 0    | 0    | 0    |
| <b>Libya</b>     |      |      |      |      |      |
| Cereals          | 0    | 0    | 0    | 0    | 0    |
| Fiber            | 0    | 0    | 0    | 0    | 0    |
| Fruit            | 0    | 0.01 | 0    | 0    | 0    |
| Livestock        | 0.01 | 0.1  | 0.04 | 0.03 | 0.03 |
| Oil crops        | 0    | 0.01 | 0    | 0    | 0.01 |
| Pulses           | 0    | 0    | 0    | 0    | 0    |
| Roots & tubers   | 0    | 0    | 0    | 0    | 0    |
| Sugar crops      | 0    | 0    | 0    | 0    | 0    |
| Vegetables       | 0.01 | 0.03 | 0.01 | 0.01 | 0.02 |
| <b>Lithuania</b> |      |      |      |      |      |
| Cereals          | 0    | 0    | 0    | 0    | 0    |
| Fiber            | 0    | 0    | 0    | 0    | 0    |
| Fruit            | 0    | 0    | 0    | 0    | 0    |
| Livestock        | 0.03 | 0.16 | 0.09 | 0.33 | 0.12 |
| Oil crops        | 0    | 0    | 0    | 0    | 0    |
| Pulses           | 0    | 0    | 0    | 0    | 0    |
| Roots & tubers   | 0    | 0    | 0    | 0    | 0    |

|                   |      |      |      |      |      |
|-------------------|------|------|------|------|------|
| Sugar crops       | 0    | 0    | 0    | 0.01 | 0    |
| Vegetables        | 0    | 0    | 0    | 0    | 0    |
| <b>Luxembourg</b> |      |      |      |      |      |
| Cereals           | 0    | 0    | 0    | 0    | 0    |
| Fiber             | 0    | 0    | 0    | 0    | 0    |
| Fruit             | 0    | 0    | 0    | 0    | 0    |
| Livestock         | 0    | 0.01 | 0.02 | 0.05 | 0.01 |
| Oil crops         | 0    | 0    | 0    | 0    | 0    |
| Pulses            | 0    | 0    | 0    | 0    | 0    |
| Roots & tubers    | 0    | 0    | 0    | 0    | 0    |
| Sugar crops       | 0    | 0    | 0    | 0    | 0    |
| Vegetables        | 0    | 0    | 0    | 0    | 0    |
| <b>Madagascar</b> |      |      |      |      |      |
| Cereals           | 0.02 | 0.02 | 0    | 0    | 0    |
| Fiber             | 0    | 0    | 0    | 0    | 0    |
| Fruit             | 0.01 | 0.01 | 0    | 0    | 0    |
| Livestock         | 0.1  | 0.12 | 0.01 | 0    | 0    |
| Oil crops         | 0    | 0    | 0    | 0    | 0    |
| Pulses            | 0    | 0    | 0    | 0    | 0    |
| Roots & tubers    | 1.99 | 2.41 | 0.14 | 0    | 0    |
| Sugar crops       | 0    | 0    | 0    | 0    | 0    |
| Vegetables        | 0.01 | 0.01 | 0    | 0    | 0    |
| <b>Malawi</b>     |      |      |      |      |      |
| Cereals           | 0.07 | 0.11 | 0.01 | 0.01 | 0    |
| Fiber             | 0    | 0    | 0    | 0    | 0    |
| Fruit             | 0.04 | 0.07 | 0.01 | 0    | 0    |
| Livestock         | 0.02 | 0.02 | 0    | 0    | 0    |
| Oil crops         | 0    | 0    | 0    | 0    | 0    |
| Pulses            | 0    | 0    | 0    | 0    | 0    |
| Roots & tubers    | 0.01 | 0.01 | 0    | 0    | 0    |
| Sugar crops       | 0    | 0    | 0    | 0    | 0    |
| Vegetables        | 0.01 | 0.01 | 0    | 0    | 0    |
| <b>Malaysia</b>   |      |      |      |      |      |
| Cereals           | 0    | 0    | 0    | 0    | 0    |
| Fiber             | 0    | 0    | 0    | 0    | 0    |
| Fruit             | 0    | 0.01 | 0    | 0    | 0    |
| Livestock         | 0.19 | 0.64 | 0.06 | 0.11 | 0    |
| Oil crops         | 0    | 0    | 0    | 0    | 0    |
| Pulses            | 0    | 0    | 0    | 0    | 0    |
| Roots & tubers    | 0.02 | 0.06 | 0    | 0.07 | 0    |
| Sugar crops       | 0    | 0    | 0    | 0    | 0    |
| Vegetables        | 0    | 0.01 | 0    | 0    | 0    |
| <b>Mali</b>       |      |      |      |      |      |
| Cereals           | 0.02 | 0.04 | 0    | 0    | 0    |
| Fiber             | 0    | 0    | 0    | 0    | 0    |
| Fruit             | 0    | 0    | 0    | 0    | 0    |

|                   |      |      |      |      |      |
|-------------------|------|------|------|------|------|
| Livestock         | 0.15 | 0.3  | 0.03 | 0    | 0    |
| Oil crops         | 0    | 0    | 0    | 0    | 0    |
| Pulses            | 0    | 0    | 0    | 0    | 0    |
| Roots & tubers    | 0.38 | 0.6  | 0.05 | 0    | 0    |
| Sugar crops       | 0    | 0    | 0    | 0    | 0    |
| Vegetables        | 0.01 | 0.03 | 0    | 0    | 0    |
| <b>Mauritania</b> |      |      |      |      |      |
| Cereals           | 0    | 0    | 0    | 0    | 0    |
| Fiber             | 0    | 0    | 0    | 0    | 0    |
| Fruit             | 0    | 0    | 0    | 0    | 0    |
| Livestock         | 0.06 | 0.09 | 0.01 | 0    | 0    |
| Oil crops         | 0    | 0    | 0    | 0    | 0    |
| Pulses            | 0    | 0    | 0    | 0    | 0    |
| Roots & tubers    | 0    | 0.01 | 0    | 0    | 0    |
| Sugar crops       | 0    | 0    | 0    | 0    | 0    |
| Vegetables        | 0    | 0    | 0    | 0    | 0    |
| <b>Mauritius</b>  |      |      |      |      |      |
| Cereals           | 0    | 0    | 0    | 0    | 0    |
| Fiber             | 0    | 0    | 0    | 0    | 0    |
| Fruit             | 0    | 0    | 0    | 0    | 0    |
| Livestock         | 0    | 0    | 0    | 0    | 0    |
| Oil crops         | 0    | 0    | 0    | 0    | 0    |
| Pulses            | 0    | 0    | 0    | 0    | 0    |
| Roots & tubers    | 0    | 0    | 0    | 0    | 0    |
| Sugar crops       | 0    | 0    | 0    | 0    | 0    |
| Vegetables        | 0    | 0    | 0    | 0    | 0    |
| <b>Mexico</b>     |      |      |      |      |      |
| Cereals           | 0.34 | 0.67 | 0.37 | 0.21 | 0.24 |
| Fiber             | 0    | 0    | 0    | 0    | 0    |
| Fruit             | 0.02 | 0.08 | 0.15 | 0.1  | 0.14 |
| Livestock         | 0.68 | 1.76 | 2.16 | 1.27 | 1.46 |
| Oil crops         | 0    | 0    | 0    | 0    | 0    |
| Pulses            | 0    | 0.01 | 0    | 0    | 0    |
| Roots & tubers    | 0.04 | 0.08 | 0.07 | 0.05 | 0.09 |
| Sugar crops       | 0    | 0    | 0    | 0    | 0    |
| Vegetables        | 0.07 | 0.18 | 0.26 | 0.22 | 0.4  |
| <b>Mongolia</b>   |      |      |      |      |      |
| Cereals           | 0    | 0    | 0    | 0    | 0    |
| Fiber             | 0    | 0    | 0    | 0    | 0    |
| Fruit             | 0    | 0    | 0    | 0    | 0    |
| Livestock         | 0.04 | 0.04 | 0.01 | 0.04 | 0    |
| Oil crops         | 0    | 0    | 0    | 0    | 0    |
| Pulses            | 0    | 0    | 0    | 0    | 0    |
| Roots & tubers    | 0    | 0    | 0    | 0    | 0    |
| Sugar crops       | 0    | 0    | 0    | 0    | 0    |
| Vegetables        | 0    | 0    | 0    | 0    | 0    |



**Montenegro**

|                |     |      |      |      |      |
|----------------|-----|------|------|------|------|
| Cereals        | 0   | 0    | 0    | 0    | 0    |
| Fiber          | 0   | 0    | 0    | 0    | 0    |
| Fruit          | 0   | 0    | 0    | 0    | 0    |
| Livestock      | 0.1 | 0.37 | 0.12 | 0.14 | 0.01 |
| Oil crops      | 0   | 0    | 0    | 0    | 0    |
| Pulses         | 0   | 0    | 0    | 0    | 0    |
| Roots & tubers | 0   | 0    | 0    | 0    | 0    |
| Sugar crops    | 0   | 0    | 0    | 0    | 0    |
| Vegetables     | 0   | 0    | 0    | 0    | 0    |

**Morocco**

|                |      |      |      |      |      |
|----------------|------|------|------|------|------|
| Cereals        | 0    | 0.01 | 0    | 0    | 0    |
| Fiber          | 0    | 0    | 0    | 0    | 0    |
| Fruit          | 0.01 | 0.04 | 0.01 | 0.01 | 0.01 |
| Livestock      | 0.18 | 0.55 | 0.14 | 0.08 | 0.05 |
| Oil crops      | 0.01 | 0.05 | 0.01 | 0.01 | 0.02 |
| Pulses         | 0    | 0    | 0    | 0    | 0    |
| Roots & tubers | 0.01 | 0.02 | 0.01 | 0.01 | 0.01 |
| Sugar crops    | 0.01 | 0.02 | 0.01 | 0.01 | 0.01 |
| Vegetables     | 0.07 | 0.23 | 0.06 | 0.05 | 0.05 |

**Mozambique**

|                |      |      |      |      |   |
|----------------|------|------|------|------|---|
| Cereals        | 0.03 | 0.07 | 0.01 | 0    | 0 |
| Fiber          | 0    | 0    | 0    | 0    | 0 |
| Fruit          | 0    | 0    | 0    | 0    | 0 |
| Livestock      | 0.01 | 0.03 | 0    | 0    | 0 |
| Oil crops      | 0    | 0    | 0    | 0    | 0 |
| Pulses         | 0.01 | 0.01 | 0    | 0    | 0 |
| Roots & tubers | 0.87 | 1.85 | 0.22 | 0.59 | 0 |
| Sugar crops    | 0    | 0    | 0    | 0    | 0 |
| Vegetables     | 0.01 | 0.02 | 0    | 0.01 | 0 |

**Myanmar**

|                |      |      |      |      |   |
|----------------|------|------|------|------|---|
| Cereals        | 0.03 | 0.05 | 0    | 0    | 0 |
| Fiber          | 0    | 0    | 0    | 0    | 0 |
| Fruit          | 0.09 | 0.15 | 0.01 | 0    | 0 |
| Livestock      | 0.35 | 0.53 | 0.02 | 0.02 | 0 |
| Oil crops      | 0    | 0.01 | 0    | 0    | 0 |
| Pulses         | 0.01 | 0.02 | 0    | 0    | 0 |
| Roots & tubers | 0.1  | 0.17 | 0.01 | 0    | 0 |
| Sugar crops    | 0    | 0    | 0    | 0    | 0 |
| Vegetables     | 0    | 0    | 0    | 0    | 0 |

**Namibia**

|           |      |      |   |      |   |
|-----------|------|------|---|------|---|
| Cereals   | 0    | 0    | 0 | 0    | 0 |
| Fiber     | 0    | 0    | 0 | 0    | 0 |
| Fruit     | 0    | 0    | 0 | 0    | 0 |
| Livestock | 0.01 | 0.02 | 0 | 0.01 | 0 |
| Oil crops | 0    | 0    | 0 | 0    | 0 |

|                    |      |      |      |      |      |
|--------------------|------|------|------|------|------|
| Pulses             | 0    | 0    | 0    | 0    | 0    |
| Roots & tubers     | 0    | 0    | 0    | 0    | 0    |
| Sugar crops        | 0    | 0    | 0    | 0    | 0    |
| Vegetables         | 0    | 0    | 0    | 0    | 0    |
| <b>Nepal</b>       |      |      |      |      |      |
| Cereals            | 0.05 | 0.09 | 0.01 | 0    | 0    |
| Fiber              | 0    | 0    | 0    | 0    | 0    |
| Fruit              | 0    | 0    | 0    | 0    | 0    |
| Livestock          | 0.17 | 0.31 | 0.03 | 0.01 | 0    |
| Oil crops          | 0    | 0    | 0    | 0    | 0    |
| Pulses             | 0    | 0    | 0    | 0    | 0    |
| Roots & tubers     | 0    | 0    | 0    | 0    | 0    |
| Sugar crops        | 0    | 0    | 0    | 0    | 0    |
| Vegetables         | 0    | 0    | 0    | 0    | 0    |
| <b>Netherlands</b> |      |      |      |      |      |
| Cereals            | 0    | 0.01 | 0    | 0.01 | 0    |
| Fiber              | 0    | 0    | 0    | 0    | 0    |
| Fruit              | 0    | 0    | 0    | 0    | 0    |
| Livestock          | 0.14 | 1.07 | 0.81 | 2.2  | 0.58 |
| Oil crops          | 0    | 0    | 0    | 0    | 0    |
| Pulses             | 0    | 0    | 0    | 0    | 0    |
| Roots & tubers     | 0    | 0    | 0    | 0    | 0    |
| Sugar crops        | 0    | 0.01 | 0.01 | 0.04 | 0.02 |
| Vegetables         | 0.01 | 0.04 | 0.03 | 0.12 | 0.05 |
| <b>New Zealand</b> |      |      |      |      |      |
| Cereals            | 0    | 0    | 0    | 0    | 0.02 |
| Fiber              | 0    | 0    | 0    | 0    | 0    |
| Fruit              | 0    | 0    | 0    | 0    | 0.01 |
| Livestock          | 0.01 | 0.18 | 0.26 | 1.08 | 3.59 |
| Oil crops          | 0    | 0    | 0    | 0    | 0    |
| Pulses             | 0    | 0    | 0    | 0    | 0    |
| Roots & tubers     | 0    | 0    | 0    | 0.01 | 0.07 |
| Sugar crops        | 0    | 0    | 0    | 0    | 0    |
| Vegetables         | 0    | 0    | 0    | 0.01 | 0.03 |
| <b>Nicaragua</b>   |      |      |      |      |      |
| Cereals            | 0.01 | 0.01 | 0.01 | 0.01 | 0.01 |
| Fiber              | 0    | 0    | 0    | 0    | 0    |
| Fruit              | 0    | 0.01 | 0.01 | 0    | 0    |
| Livestock          | 0.03 | 0.07 | 0.07 | 0.05 | 0.06 |
| Oil crops          | 0    | 0    | 0    | 0    | 0    |
| Pulses             | 0    | 0    | 0    | 0    | 0    |
| Roots & tubers     | 0    | 0    | 0    | 0    | 0    |
| Sugar crops        | 0    | 0    | 0    | 0    | 0    |
| Vegetables         | 0    | 0    | 0    | 0    | 0    |
| <b>Niger</b>       |      |      |      |      |      |
| Cereals            | 0    | 0    | 0    | 0    | 0    |

|                 |      |      |      |      |      |
|-----------------|------|------|------|------|------|
| Fiber           | 0    | 0    | 0    | 0    | 0    |
| Fruit           | 0    | 0    | 0    | 0    | 0    |
| Livestock       | 0.12 | 0.17 | 0.01 | 0.02 | 0    |
| Oil crops       | 0    | 0    | 0    | 0    | 0    |
| Pulses          | 0    | 0    | 0    | 0    | 0    |
| Roots & tubers  | 0.17 | 0.23 | 0.02 | 0.04 | 0    |
| Sugar crops     | 0    | 0    | 0    | 0    | 0    |
| Vegetables      | 0.02 | 0.02 | 0    | 0    | 0    |
| <b>Nigeria</b>  |      |      |      |      |      |
| Cereals         | 0.17 | 0.32 | 0.04 | 0.03 | 0    |
| Fiber           | 0    | 0    | 0    | 0    | 0    |
| Fruit           | 0.29 | 0.58 | 0.07 | 0.09 | 0    |
| Livestock       | 0.15 | 0.34 | 0.04 | 0.44 | 0    |
| Oil crops       | 0    | 0    | 0    | 0    | 0    |
| Pulses          | 0    | 0.01 | 0    | 0    | 0    |
| Roots & tubers  | 4.97 | 10.1 | 1.14 | 1.68 | 0    |
| Sugar crops     | 0    | 0    | 0    | 0    | 0    |
| Vegetables      | 0.33 | 0.39 | 0.02 | 0    | 0    |
| <b>Norway</b>   |      |      |      |      |      |
| Cereals         | 0    | 0    | 0    | 0    | 0    |
| Fiber           | 0    | 0    | 0    | 0    | 0    |
| Fruit           | 0    | 0    | 0    | 0    | 0    |
| Livestock       | 0.01 | 0.14 | 0.13 | 0.3  | 0.04 |
| Oil crops       | 0    | 0    | 0    | 0    | 0    |
| Pulses          | 0    | 0    | 0    | 0    | 0    |
| Roots & tubers  | 0    | 0    | 0    | 0    | 0    |
| Sugar crops     | 0    | 0    | 0    | 0    | 0    |
| Vegetables      | 0    | 0    | 0    | 0    | 0    |
| <b>Oman</b>     |      |      |      |      |      |
| Cereals         | 0    | 0    | 0    | 0    | 0    |
| Fiber           | 0    | 0    | 0    | 0    | 0    |
| Fruit           | 0    | 0.01 | 0    | 0    | 0    |
| Livestock       | 0.01 | 0.04 | 0.02 | 0.01 | 0    |
| Oil crops       | 0    | 0    | 0    | 0    | 0    |
| Pulses          | 0    | 0    | 0    | 0    | 0    |
| Roots & tubers  | 0    | 0    | 0    | 0    | 0    |
| Sugar crops     | 0    | 0    | 0    | 0    | 0    |
| Vegetables      | 0    | 0.01 | 0    | 0    | 0    |
| <b>Pakistan</b> |      |      |      |      |      |
| Cereals         | 0.08 | 0.17 | 0.02 | 0    | 0    |
| Fiber           | 0    | 0    | 0    | 0    | 0    |
| Fruit           | 0.04 | 0.11 | 0.01 | 0    | 0    |
| Livestock       | 3.78 | 6.51 | 0.71 | 0.14 | 0    |
| Oil crops       | 0    | 0.01 | 0    | 0    | 0    |
| Pulses          | 0.01 | 0.01 | 0    | 0    | 0    |
| Roots & tubers  | 0.01 | 0.03 | 0    | 0    | 0    |

|                         |      |      |      |      |      |
|-------------------------|------|------|------|------|------|
| Sugar crops             | 0    | 0    | 0    | 0    | 0    |
| Vegetables              | 0.05 | 0.11 | 0.01 | 0    | 0    |
| <b>Panama</b>           |      |      |      |      |      |
| Cereals                 | 0    | 0    | 0    | 0    | 0    |
| Fiber                   | 0    | 0    | 0    | 0    | 0    |
| Fruit                   | 0.01 | 0.02 | 0.02 | 0.01 | 0.01 |
| Livestock               | 0.03 | 0.06 | 0.03 | 0.01 | 0.01 |
| Oil crops               | 0    | 0    | 0    | 0    | 0    |
| Pulses                  | 0    | 0    | 0    | 0    | 0    |
| Roots & tubers          | 0    | 0    | 0    | 0    | 0    |
| Sugar crops             | 0    | 0    | 0    | 0    | 0    |
| Vegetables              | 0    | 0    | 0    | 0    | 0    |
| <b>Papua New Guinea</b> |      |      |      |      |      |
| Cereals                 | 0    | 0    | 0    | 0    | 0    |
| Fiber                   | 0    | 0    | 0    | 0    | 0    |
| Fruit                   | 0.01 | 0.01 | 0    | 0    | 0    |
| Livestock               | 0.01 | 0    | 0    | 0    | 0    |
| Oil crops               | 0    | 0    | 0    | 0    | 0    |
| Pulses                  | 0    | 0    | 0    | 0    | 0    |
| Roots & tubers          | 0.87 | 1.22 | 0.46 | 0.25 | 0    |
| Sugar crops             | 0    | 0    | 0    | 0    | 0    |
| Vegetables              | 0    | 0    | 0    | 0    | 0    |
| <b>Paraguay</b>         |      |      |      |      |      |
| Cereals                 | 0    | 0.01 | 0.01 | 0.02 | 0.09 |
| Fiber                   | 0    | 0    | 0    | 0    | 0    |
| Fruit                   | 0    | 0    | 0    | 0.01 | 0.03 |
| Livestock               | 0    | 0.04 | 0.04 | 0.07 | 0.15 |
| Oil crops               | 0    | 0    | 0    | 0.01 | 0.04 |
| Pulses                  | 0    | 0    | 0    | 0    | 0    |
| Roots & tubers          | 0    | 0.03 | 0.03 | 0.11 | 0.56 |
| Sugar crops             | 0    | 0    | 0    | 0    | 0    |
| Vegetables              | 0    | 0    | 0    | 0.01 | 0.02 |
| <b>Peru</b>             |      |      |      |      |      |
| Cereals                 | 0    | 0.03 | 0.02 | 0.03 | 0.03 |
| Fiber                   | 0    | 0    | 0    | 0    | 0    |
| Fruit                   | 0.01 | 0.14 | 0.13 | 0.17 | 0.23 |
| Livestock               | 0.02 | 0.27 | 0.24 | 0.27 | 0.23 |
| Oil crops               | 0    | 0    | 0    | 0    | 0    |
| Pulses                  | 0    | 0    | 0    | 0    | 0    |
| Roots & tubers          | 0.01 | 0.21 | 0.2  | 0.25 | 0.31 |
| Sugar crops             | 0    | 0    | 0    | 0    | 0    |
| Vegetables              | 0    | 0.02 | 0.02 | 0.02 | 0    |
| <b>Philippines</b>      |      |      |      |      |      |
| Cereals                 | 0.05 | 0.22 | 0.02 | 0.22 | 0    |
| Fiber                   | 0    | 0    | 0    | 0    | 0    |
| Fruit                   | 0.03 | 0.09 | 0.01 | 0.04 | 0    |

|                          |      |      |      |      |      |
|--------------------------|------|------|------|------|------|
| Livestock                | 0.27 | 0.51 | 0.03 | 0.01 | 0    |
| Oil crops                | 0    | 0    | 0    | 0    | 0    |
| Pulses                   | 0    | 0    | 0    | 0    | 0    |
| Roots & tubers           | 0.49 | 1.31 | 0.11 | 1.03 | 0    |
| Sugar crops              | 0    | 0    | 0    | 0    | 0    |
| Vegetables               | 0.01 | 0.03 | 0    | 0.02 | 0    |
| <b>Poland</b>            |      |      |      |      |      |
| Cereals                  | 0.01 | 0.04 | 0.02 | 0.09 | 0.04 |
| Fiber                    | 0    | 0    | 0    | 0    | 0    |
| Fruit                    | 0    | 0.02 | 0.01 | 0.02 | 0.01 |
| Livestock                | 0.47 | 1.71 | 0.67 | 1.69 | 0.53 |
| Oil crops                | 0    | 0    | 0    | 0.01 | 0    |
| Pulses                   | 0    | 0.01 | 0    | 0.01 | 0    |
| Roots & tubers           | 0    | 0    | 0    | 0    | 0    |
| Sugar crops              | 0.01 | 0.04 | 0.02 | 0.08 | 0.03 |
| Vegetables               | 0.02 | 0.08 | 0.03 | 0.09 | 0.03 |
| <b>Portugal</b>          |      |      |      |      |      |
| Cereals                  | 0    | 0.02 | 0.01 | 0.02 | 0    |
| Fiber                    | 0    | 0    | 0    | 0    | 0    |
| Fruit                    | 0.01 | 0.02 | 0.01 | 0.02 | 0.01 |
| Livestock                | 0.12 | 0.4  | 0.11 | 0.24 | 0.08 |
| Oil crops                | 0    | 0.01 | 0    | 0.02 | 0.01 |
| Pulses                   | 0    | 0    | 0    | 0    | 0    |
| Roots & tubers           | 0.01 | 0.02 | 0.01 | 0.04 | 0.02 |
| Sugar crops              | 0    | 0    | 0    | 0    | 0    |
| Vegetables               | 0.03 | 0.1  | 0.04 | 0.17 | 0.08 |
| <b>Qatar</b>             |      |      |      |      |      |
| Cereals                  | 0    | 0    | 0    | 0    | 0    |
| Fiber                    | 0    | 0    | 0    | 0    | 0    |
| Fruit                    | 0    | 0    | 0    | 0    | 0    |
| Livestock                | 0    | 0    | 0    | 0    | 0    |
| Oil crops                | 0    | 0    | 0    | 0    | 0    |
| Pulses                   | 0    | 0    | 0    | 0    | 0    |
| Roots & tubers           | 0    | 0    | 0    | 0    | 0    |
| Sugar crops              | 0    | 0    | 0    | 0    | 0    |
| Vegetables               | 0    | 0    | 0    | 0    | 0    |
| <b>Republic of Korea</b> |      |      |      |      |      |
| Cereals                  | 0    | 0    | 0    | 0    | 0    |
| Fiber                    | 0    | 0    | 0    | 0    | 0    |
| Fruit                    | 0.01 | 0.01 | 0    | 0    | 0    |
| Livestock                | 0.71 | 0.96 | 0.03 | 0.01 | 0    |
| Oil crops                | 0    | 0    | 0    | 0    | 0    |
| Pulses                   | 0    | 0    | 0    | 0    | 0    |
| Roots & tubers           | 0.66 | 0.88 | 0.03 | 0.01 | 0    |
| Sugar crops              | 0    | 0    | 0    | 0    | 0    |
| Vegetables               | 0.07 | 0.1  | 0    | 0    | 0    |

|                                         |      |      |      |      |      |
|-----------------------------------------|------|------|------|------|------|
| <b>Romania</b>                          |      |      |      |      |      |
| Cereals                                 | 0.03 | 0.14 | 0.08 | 0.3  | 0.12 |
| Fiber                                   | 0    | 0    | 0    | 0    | 0    |
| Fruit                                   | 0    | 0.01 | 0    | 0.02 | 0.01 |
| Livestock                               | 0.16 | 0.69 | 0.34 | 1.13 | 0.42 |
| Oil crops                               | 0    | 0    | 0    | 0.01 | 0    |
| Pulses                                  | 0    | 0    | 0    | 0    | 0    |
| Roots & tubers                          | 0    | 0    | 0    | 0    | 0    |
| Sugar crops                             | 0    | 0    | 0    | 0    | 0    |
| Vegetables                              | 0.01 | 0.06 | 0.03 | 0.11 | 0.04 |
| <b>Russian Federation</b>               |      |      |      |      |      |
| Cereals                                 | 0.02 | 0.11 | 0.06 | 0.22 | 0.09 |
| Fiber                                   | 0    | 0    | 0    | 0    | 0    |
| Fruit                                   | 0    | 0.01 | 0    | 0.03 | 0.02 |
| Livestock                               | 0.68 | 3.03 | 1.6  | 6.16 | 2.51 |
| Oil crops                               | 0    | 0.02 | 0.01 | 0.06 | 0.03 |
| Pulses                                  | 0    | 0.02 | 0.01 | 0.03 | 0.01 |
| Roots & tubers                          | 0    | 0    | 0    | 0    | 0    |
| Sugar crops                             | 0.02 | 0.07 | 0.03 | 0.19 | 0.1  |
| Vegetables                              | 0.04 | 0.18 | 0.09 | 0.36 | 0.16 |
| <b>Rwanda</b>                           |      |      |      |      |      |
| Cereals                                 | 0    | 0.01 | 0    | 0    | 0    |
| Fiber                                   | 0    | 0    | 0    | 0    | 0    |
| Fruit                                   | 0.34 | 0.56 | 0.05 | 0    | 0    |
| Livestock                               | 0.03 | 0.04 | 0    | 0    | 0    |
| Oil crops                               | 0    | 0    | 0    | 0    | 0    |
| Pulses                                  | 0    | 0    | 0    | 0    | 0    |
| Roots & tubers                          | 1.64 | 2.43 | 0.2  | 0    | 0    |
| Sugar crops                             | 0    | 0    | 0    | 0    | 0    |
| Vegetables                              | 0.01 | 0.01 | 0    | 0    | 0    |
| <b>Saint Lucia</b>                      |      |      |      |      |      |
| Cereals                                 | 0    | 0    | 0    | 0    | 0    |
| Fiber                                   | 0    | 0    | 0    | 0    | 0    |
| Fruit                                   | 0    | 0    | 0    | 0    | 0    |
| Livestock                               | 0    | 0    | 0    | 0    | 0    |
| Oil crops                               | 0    | 0    | 0    | 0    | 0    |
| Pulses                                  | 0    | 0    | 0    | 0    | 0    |
| Roots & tubers                          | 0    | 0    | 0    | 0    | 0    |
| Sugar crops                             | 0    | 0    | 0    | 0    | 0    |
| Vegetables                              | 0    | 0    | 0    | 0    | 0    |
| <b>Saint Vincent and the Grenadines</b> |      |      |      |      |      |
| Cereals                                 | 0    | 0    | 0    | 0    | 0    |
| Fiber                                   | 0    | 0    | 0    | 0    | 0    |
| Fruit                                   | 0    | 0    | 0    | 0    | 0    |
| Livestock                               | 0    | 0    | 0    | 0    | 0    |

|                     |      |      |      |      |      |
|---------------------|------|------|------|------|------|
| Oil crops           | 0    | 0    | 0    | 0    | 0    |
| Pulses              | 0    | 0    | 0    | 0    | 0    |
| Roots & tubers      | 0    | 0    | 0    | 0    | 0    |
| Sugar crops         | 0    | 0    | 0    | 0    | 0    |
| Vegetables          | 0    | 0    | 0    | 0    | 0    |
| <b>Saudi Arabia</b> |      |      |      |      |      |
| Cereals             | 0    | 0.01 | 0    | 0    | 0    |
| Fiber               | 0    | 0    | 0    | 0    | 0    |
| Fruit               | 0.01 | 0.04 | 0.01 | 0.01 | 0    |
| Livestock           | 0.12 | 0.48 | 0.16 | 0.08 | 0.01 |
| Oil crops           | 0    | 0    | 0    | 0    | 0    |
| Pulses              | 0    | 0    | 0    | 0    | 0    |
| Roots & tubers      | 0    | 0    | 0    | 0    | 0    |
| Sugar crops         | 0    | 0    | 0    | 0    | 0    |
| Vegetables          | 0.03 | 0.11 | 0.03 | 0.01 | 0    |
| <b>Senegal</b>      |      |      |      |      |      |
| Cereals             | 0.01 | 0.01 | 0    | 0    | 0    |
| Fiber               | 0    | 0    | 0    | 0    | 0    |
| Fruit               | 0    | 0    | 0    | 0    | 0    |
| Livestock           | 0.02 | 0.06 | 0.01 | 0    | 0    |
| Oil crops           | 0    | 0    | 0    | 0    | 0    |
| Pulses              | 0    | 0    | 0    | 0    | 0    |
| Roots & tubers      | 0.07 | 0.09 | 0.01 | 0    | 0    |
| Sugar crops         | 0    | 0    | 0    | 0    | 0    |
| Vegetables          | 0.02 | 0.03 | 0    | 0    | 0    |
| <b>Serbia</b>       |      |      |      |      |      |
| Cereals             | 0.04 | 0.14 | 0.05 | 0.15 | 0.05 |
| Fiber               | 0    | 0    | 0    | 0    | 0    |
| Fruit               | 0    | 0.01 | 0    | 0    | 0    |
| Oil crops           | 0    | 0    | 0    | 0    | 0    |
| Pulses              | 0    | 0    | 0    | 0    | 0    |
| Roots & tubers      | 0    | 0    | 0    | 0    | 0    |
| Sugar crops         | 0.01 | 0.02 | 0.01 | 0.01 | 0    |
| Vegetables          | 0.01 | 0.02 | 0.01 | 0.02 | 0.01 |
| <b>Sierra Leone</b> |      |      |      |      |      |
| Cereals             | 0    | 0    | 0    | 0    | 0    |
| Fiber               | 0    | 0    | 0    | 0    | 0    |
| Fruit               | 0    | 0.01 | 0    | 0    | 0    |
| Livestock           | 0.01 | 0.01 | 0    | 0    | 0    |
| Oil crops           | 0    | 0    | 0    | 0    | 0    |
| Pulses              | 0    | 0.01 | 0    | 0    | 0    |
| Roots & tubers      | 0.16 | 0.35 | 0.04 | 0    | 0    |
| Sugar crops         | 0    | 0    | 0    | 0    | 0    |
| Vegetables          | 0    | 0    | 0    | 0    | 0    |
| <b>Slovakia</b>     |      |      |      |      |      |
| Cereals             | 0.01 | 0.02 | 0.01 | 0.03 | 0.01 |

|                     |      |      |      |      |      |
|---------------------|------|------|------|------|------|
| Fiber               | 0    | 0    | 0    | 0    | 0    |
| Fruit               | 0    | 0    | 0    | 0    | 0    |
| Livestock           | 0.02 | 0.11 | 0.07 | 0.23 | 0.08 |
| Oil crops           | 0    | 0    | 0    | 0    | 0    |
| Pulses              | 0    | 0    | 0    | 0    | 0    |
| Roots & tubers      | 0    | 0    | 0    | 0    | 0    |
| Sugar crops         | 0    | 0.01 | 0    | 0.01 | 0    |
| Vegetables          | 0    | 0.01 | 0    | 0.01 | 0    |
| <b>Slovenia</b>     |      |      |      |      |      |
| Cereals             | 0    | 0.01 | 0    | 0    | 0    |
| Fiber               | 0    | 0    | 0    | 0    | 0    |
| Fruit               | 0    | 0    | 0    | 0    | 0    |
| Livestock           | 0.04 | 0.14 | 0.04 | 0.03 | 0    |
| Oil crops           | 0    | 0    | 0    | 0    | 0    |
| Pulses              | 0    | 0    | 0    | 0    | 0    |
| Roots & tubers      | 0    | 0    | 0    | 0    | 0    |
| Sugar crops         | 0    | 0    | 0    | 0    | 0    |
| Vegetables          | 0    | 0    | 0    | 0    | 0    |
| <b>Somalia</b>      |      |      |      |      |      |
| Cereals             | 0    | 0.01 | 0    | 0    | 0    |
| Fiber               | 0    | 0    | 0    | 0    | 0    |
| Fruit               | 0    | 0    | 0    | 0    | 0    |
| Livestock           | 0.19 | 0.39 | 0.04 | 0    | 0    |
| Oil crops           | 0    | 0    | 0    | 0    | 0    |
| Pulses              | 0    | 0    | 0    | 0    | 0    |
| Roots & tubers      | 0    | 0    | 0    | 0    | 0    |
| Sugar crops         | 0    | 0    | 0    | 0    | 0    |
| Vegetables          | 0    | 0    | 0    | 0    | 0    |
| <b>South Africa</b> |      |      |      |      |      |
| Cereals             | 0.02 | 0.19 | 0.03 | 0.48 | 0    |
| Fiber               | 0    | 0    | 0    | 0    | 0    |
| Fruit               | 0.05 | 0.14 | 0.02 | 0.06 | 0    |
| Livestock           | 0.22 | 0.7  | 0.1  | 0.86 | 0    |
| Oil crops           | 0    | 0    | 0    | 0    | 0    |
| Pulses              | 0    | 0    | 0    | 0    | 0    |
| Roots & tubers      | 0.03 | 0.12 | 0.02 | 0.09 | 0    |
| Sugar crops         | 0    | 0    | 0    | 0    | 0    |
| Vegetables          | 0.03 | 0.1  | 0.01 | 0.04 | 0    |
| <b>Spain</b>        |      |      |      |      |      |
| Cereals             | 0.02 | 0.1  | 0.05 | 0.16 | 0.05 |
| Fiber               | 0    | 0    | 0    | 0    | 0    |
| Fruit               | 0.03 | 0.13 | 0.05 | 0.17 | 0.06 |
| Livestock           | 0.36 | 1.39 | 0.59 | 1.33 | 0.35 |
| Oil crops           | 0.02 | 0.12 | 0.07 | 0.43 | 0.21 |
| Pulses              | 0    | 0    | 0    | 0.01 | 0    |
| Roots & tubers      | 0.01 | 0.03 | 0.01 | 0.05 | 0.02 |



|                       |      |      |      |      |      |
|-----------------------|------|------|------|------|------|
| Sugar crops           | 0    | 0.01 | 0.01 | 0.05 | 0.02 |
| Vegetables            | 0.1  | 0.4  | 0.18 | 0.67 | 0.27 |
| <b>Sri Lanka</b>      |      |      |      |      |      |
| Cereals               | 0    | 0    | 0    | 0    | 0    |
| Fiber                 | 0    | 0    | 0    | 0    | 0    |
| Fruit                 | 0.04 | 0.09 | 0.01 | 0.04 | 0    |
| Livestock             | 0.06 | 0.08 | 0.01 | 0.01 | 0    |
| Oil crops             | 0    | 0    | 0    | 0    | 0    |
| Pulses                | 0    | 0    | 0    | 0    | 0    |
| Roots & tubers        | 0.05 | 0.12 | 0.01 | 0.04 | 0    |
| Sugar crops           | 0    | 0    | 0    | 0    | 0    |
| Vegetables            | 0.01 | 0.01 | 0    | 0.01 | 0    |
| <b>Sudan (former)</b> |      |      |      |      |      |
| Cereals               | 0    | 0    | 0    | 0    | 0    |
| Fiber                 | 0    | 0    | 0    | 0    | 0    |
| Fruit                 | 0.01 | 0.03 | 0.01 | 0.01 | 0.02 |
| Livestock             | 0.37 | 1.34 | 0.39 | 0.34 | 0.37 |
| Oil crops             | 0    | 0    | 0    | 0    | 0    |
| Pulses                | 0    | 0    | 0    | 0    | 0    |
| Roots & tubers        | 0.11 | 0.39 | 0.11 | 0.13 | 0.18 |
| Sugar crops           | 0    | 0    | 0    | 0    | 0    |
| Vegetables            | 0.03 | 0.09 | 0.03 | 0.03 | 0.04 |
| <b>Suriname</b>       |      |      |      |      |      |
| Cereals               | 0    | 0    | 0    | 0    | 0    |
| Fiber                 | 0    | 0    | 0    | 0    | 0    |
| Fruit                 | 0    | 0    | 0    | 0    | 0    |
| Livestock             | 0    | 0    | 0    | 0    | 0.01 |
| Oil crops             | 0    | 0    | 0    | 0    | 0    |
| Pulses                | 0    | 0    | 0    | 0    | 0    |
| Roots & tubers        | 0    | 0    | 0    | 0    | 0    |
| Sugar crops           | 0    | 0    | 0    | 0    | 0    |
| Vegetables            | 0    | 0    | 0    | 0    | 0    |
| <b>Swaziland</b>      |      |      |      |      |      |
| Cereals               | 0    | 0    | 0    | 0    | 0    |
| Fiber                 | 0    | 0    | 0    | 0    | 0    |
| Fruit                 | 0    | 0.01 | 0    | 0    | 0    |
| Livestock             | 0    | 0.01 | 0    | 0    | 0    |
| Oil crops             | 0    | 0    | 0    | 0    | 0    |
| Pulses                | 0    | 0    | 0    | 0    | 0    |
| Roots & tubers        | 0    | 0.01 | 0    | 0    | 0    |
| Sugar crops           | 0    | 0    | 0    | 0    | 0    |
| Vegetables            | 0    | 0    | 0    | 0    | 0    |
| <b>Sweden</b>         |      |      |      |      |      |
| Cereals               | 0    | 0    | 0    | 0.01 | 0    |
| Fiber                 | 0    | 0    | 0    | 0    | 0    |
| Fruit                 | 0    | 0    | 0    | 0    | 0    |

|                             |      |      |      |      |      |
|-----------------------------|------|------|------|------|------|
| Livestock                   | 0.03 | 0.26 | 0.19 | 0.56 | 0.17 |
| Oil crops                   | 0    | 0    | 0    | 0    | 0    |
| Pulses                      | 0    | 0    | 0    | 0    | 0    |
| Roots & tubers              | 0    | 0    | 0    | 0    | 0    |
| Sugar crops                 | 0    | 0.01 | 0.01 | 0.01 | 0    |
| Vegetables                  | 0    | 0    | 0    | 0    | 0    |
| <b>Switzerland</b>          |      |      |      |      |      |
| Cereals                     | 0    | 0    | 0    | 0.01 | 0    |
| Fiber                       | 0    | 0    | 0    | 0    | 0    |
| Fruit                       | 0    | 0    | 0    | 0    | 0    |
| Livestock                   | 0.05 | 0.37 | 0.29 | 0.6  | 0.07 |
| Oil crops                   | 0    | 0    | 0    | 0    | 0    |
| Pulses                      | 0    | 0    | 0    | 0    | 0    |
| Roots & tubers              | 0    | 0    | 0    | 0    | 0    |
| Sugar crops                 | 0    | 0.01 | 0    | 0.01 | 0    |
| Vegetables                  | 0    | 0    | 0    | 0    | 0    |
| <b>Syrian Arab Republic</b> |      |      |      |      |      |
| Cereals                     | 0.01 | 0.01 | 0    | 0    | 0    |
| Fiber                       | 0    | 0    | 0    | 0    | 0    |
| Fruit                       | 0.01 | 0.03 | 0.01 | 0.01 | 0.01 |
| Livestock                   | 0.22 | 0.67 | 0.17 | 0.12 | 0.11 |
| Oil crops                   | 0.02 | 0.06 | 0.02 | 0.01 | 0.01 |
| Pulses                      | 0    | 0    | 0    | 0    | 0    |
| Roots & tubers              | 0    | 0    | 0    | 0    | 0    |
| Sugar crops                 | 0    | 0.01 | 0    | 0    | 0    |
| Vegetables                  | 0.06 | 0.2  | 0.06 | 0.05 | 0.04 |
| <b>Tajikistan</b>           |      |      |      |      |      |
| Cereals                     | 0    | 0.01 | 0    | 0    | 0    |
| Fiber                       | 0    | 0    | 0    | 0    | 0    |
| Fruit                       | 0    | 0    | 0    | 0    | 0    |
| Livestock                   | 0.02 | 0.08 | 0.03 | 0.03 | 0.04 |
| Oil crops                   | 0    | 0    | 0    | 0    | 0    |
| Pulses                      | 0    | 0    | 0    | 0    | 0    |
| Roots & tubers              | 0    | 0    | 0    | 0    | 0    |
| Sugar crops                 | 0    | 0    | 0    | 0    | 0    |
| Vegetables                  | 0.01 | 0.04 | 0.01 | 0.01 | 0.01 |
| <b>Thailand</b>             |      |      |      |      |      |
| Cereals                     | 0.06 | 0.24 | 0.02 | 0.01 | 0    |
| Fiber                       | 0    | 0    | 0    | 0    | 0    |
| Fruit                       | 0.05 | 0.12 | 0.01 | 0    | 0    |
| Livestock                   | 0.26 | 1.33 | 0.14 | 0.06 | 0    |
| Oil crops                   | 0    | 0    | 0    | 0    | 0    |
| Pulses                      | 0    | 0.01 | 0    | 0    | 0    |
| Roots & tubers              | 0.04 | 0.13 | 0.01 | 0.01 | 0    |
| Sugar crops                 | 0    | 0    | 0    | 0    | 0    |
| Vegetables                  | 0.01 | 0.04 | 0    | 0    | 0    |

**The former Yugoslav  
Republic of Macedonia**

|                |      |      |      |      |   |
|----------------|------|------|------|------|---|
| Cereals        | 0    | 0    | 0    | 0    | 0 |
| Fiber          | 0    | 0    | 0    | 0    | 0 |
| Fruit          | 0    | 0    | 0    | 0    | 0 |
| Livestock      | 0.01 | 0.06 | 0.03 | 0.04 | 0 |
| Oil crops      | 0    | 0    | 0    | 0    | 0 |
| Pulses         | 0    | 0    | 0    | 0    | 0 |
| Roots & tubers | 0    | 0    | 0    | 0    | 0 |
| Sugar crops    | 0    | 0    | 0    | 0    | 0 |
| Vegetables     | 0    | 0.02 | 0.01 | 0.02 | 0 |

**Togo**

|                |      |      |   |   |   |
|----------------|------|------|---|---|---|
| Cereals        | 0.01 | 0.03 | 0 | 0 | 0 |
| Fiber          | 0    | 0    | 0 | 0 | 0 |
| Fruit          | 0    | 0    | 0 | 0 | 0 |
| Livestock      | 0.01 | 0.01 | 0 | 0 | 0 |
| Oil crops      | 0    | 0    | 0 | 0 | 0 |
| Pulses         | 0    | 0    | 0 | 0 | 0 |
| Roots & tubers | 0.02 | 0.03 | 0 | 0 | 0 |
| Sugar crops    | 0    | 0    | 0 | 0 | 0 |
| Vegetables     | 0    | 0    | 0 | 0 | 0 |

**Trinidad and Tobago**

|                |   |   |   |   |   |
|----------------|---|---|---|---|---|
| Cereals        | 0 | 0 | 0 | 0 | 0 |
| Fiber          | 0 | 0 | 0 | 0 | 0 |
| Fruit          | 0 | 0 | 0 | 0 | 0 |
| Livestock      | 0 | 0 | 0 | 0 | 0 |
| Oil crops      | 0 | 0 | 0 | 0 | 0 |
| Pulses         | 0 | 0 | 0 | 0 | 0 |
| Roots & tubers | 0 | 0 | 0 | 0 | 0 |
| Sugar crops    | 0 | 0 | 0 | 0 | 0 |
| Vegetables     | 0 | 0 | 0 | 0 | 0 |

**Tunisia**

|                |      |      |      |      |      |
|----------------|------|------|------|------|------|
| Cereals        | 0    | 0    | 0    | 0    | 0    |
| Fiber          | 0    | 0    | 0    | 0    | 0    |
| Fruit          | 0    | 0.02 | 0.01 | 0.01 | 0.01 |
| Livestock      | 0.05 | 0.25 | 0.09 | 0.06 | 0.04 |
| Oil crops      | 0.02 | 0.07 | 0.03 | 0.03 | 0.03 |
| Pulses         | 0    | 0    | 0    | 0    | 0    |
| Roots & tubers | 0    | 0    | 0    | 0    | 0    |
| Sugar crops    | 0    | 0    | 0    | 0    | 0    |
| Vegetables     | 0.02 | 0.09 | 0.03 | 0.08 | 0.14 |

**Turkey**

|           |      |      |      |      |      |
|-----------|------|------|------|------|------|
| Cereals   | 0.08 | 0.2  | 0.04 | 0.04 | 0.06 |
| Fiber     | 0    | 0    | 0    | 0    | 0    |
| Fruit     | 0.06 | 0.17 | 0.04 | 0.03 | 0.04 |
| Livestock | 0.95 | 2.94 | 0.74 | 0.49 | 0.35 |

|                             |      |      |      |      |      |
|-----------------------------|------|------|------|------|------|
| Oil crops                   | 0.04 | 0.12 | 0.03 | 0.02 | 0.02 |
| Pulses                      | 0    | 0    | 0    | 0    | 0    |
| Roots & tubers              | 0    | 0    | 0    | 0    | 0    |
| Sugar crops                 | 0.04 | 0.12 | 0.02 | 0.02 | 0.01 |
| Vegetables                  | 0.64 | 1.9  | 0.46 | 0.39 | 0.42 |
| <b>Turkmenistan</b>         |      |      |      |      |      |
| Cereals                     | 0    | 0    | 0    | 0    | 0    |
| Fiber                       | 0    | 0    | 0    | 0    | 0    |
| Fruit                       | 0    | 0    | 0    | 0    | 0    |
| Livestock                   | 0.01 | 0.2  | 0.09 | 0.13 | 0.2  |
| Oil crops                   | 0    | 0    | 0    | 0    | 0    |
| Pulses                      | 0    | 0    | 0    | 0    | 0    |
| Roots & tubers              | 0    | 0    | 0    | 0    | 0    |
| Sugar crops                 | 0    | 0    | 0    | 0    | 0    |
| Vegetables                  | 0    | 0.04 | 0.02 | 0.02 | 0.03 |
| <b>Uganda</b>               |      |      |      |      |      |
| Cereals                     | 0.04 | 0.06 | 0.01 | 0    | 0    |
| Fiber                       | 0    | 0    | 0    | 0    | 0    |
| Fruit                       | 1.09 | 2.02 | 0.21 | 0    | 0    |
| Livestock                   | 0.1  | 0.26 | 0.03 | 0    | 0    |
| Oil crops                   | 0    | 0    | 0    | 0    | 0    |
| Pulses                      | 0    | 0    | 0    | 0    | 0    |
| Roots & tubers              | 3.99 | 8.48 | 0.99 | 0    | 0    |
| Sugar crops                 | 0    | 0    | 0    | 0    | 0    |
| Vegetables                  | 0    | 0.01 | 0    | 0    | 0    |
| <b>Ukraine</b>              |      |      |      |      |      |
| Cereals                     | 0.05 | 0.19 | 0.08 | 0.26 | 0.1  |
| Fiber                       | 0    | 0    | 0    | 0    | 0    |
| Fruit                       | 0    | 0.01 | 0    | 0.01 | 0    |
| Livestock                   | 0.46 | 1.74 | 0.73 | 2.06 | 0.69 |
| Oil crops                   | 0.01 | 0.02 | 0.01 | 0.04 | 0.01 |
| Pulses                      | 0    | 0.01 | 0    | 0.02 | 0.01 |
| Roots & tubers              | 0    | 0    | 0    | 0    | 0    |
| Sugar crops                 | 0.01 | 0.06 | 0.03 | 0.12 | 0.05 |
| Vegetables                  | 0.04 | 0.16 | 0.07 | 0.23 | 0.09 |
| <b>United Arab Emirates</b> |      |      |      |      |      |
| Cereals                     | 0    | 0    | 0    | 0    | 0    |
| Fiber                       | 0    | 0    | 0    | 0    | 0    |
| Fruit                       | 0.01 | 0.03 | 0.01 | 0    | 0    |
| Livestock                   | 0    | 0.02 | 0.01 | 0    | 0    |
| Oil crops                   | 0    | 0    | 0    | 0    | 0    |
| Pulses                      | 0    | 0    | 0    | 0    | 0    |
| Roots & tubers              | 0    | 0    | 0    | 0    | 0    |
| Sugar crops                 | 0    | 0    | 0    | 0    | 0    |
| Vegetables                  | 0.01 | 0.02 | 0.01 | 0    | 0    |
| <b>United Kingdom</b>       |      |      |      |      |      |

|                                    |      |      |      |       |       |
|------------------------------------|------|------|------|-------|-------|
| Cereals                            | 0    | 0.01 | 0.01 | 0.02  | 0.01  |
| Fiber                              | 0    | 0    | 0    | 0     | 0     |
| Fruit                              | 0    | 0    | 0    | 0     | 0     |
| Livestock                          | 0.28 | 1.75 | 1.1  | 2.41  | 0.51  |
| Oil crops                          | 0    | 0    | 0    | 0.01  | 0     |
| Pulses                             | 0    | 0.01 | 0.01 | 0.04  | 0.01  |
| Roots & tubers                     | 0    | 0    | 0    | 0     | 0     |
| Sugar crops                        | 0    | 0.02 | 0.02 | 0.06  | 0.02  |
| Vegetables                         | 0    | 0.01 | 0    | 0.02  | 0.01  |
| <b>United Republic of Tanzania</b> |      |      |      |       |       |
| Cereals                            | 0.07 | 0.19 | 0.02 | 0     | 0     |
| Fiber                              | 0    | 0    | 0    | 0     | 0     |
| Fruit                              | 0.07 | 0.19 | 0.03 | 0     | 0     |
| Livestock                          | 0.18 | 0.37 | 0.04 | 0     | 0     |
| Oil crops                          | 0    | 0    | 0    | 0     | 0     |
| Pulses                             | 0.01 | 0.01 | 0    | 0     | 0     |
| Roots & tubers                     | 1.87 | 4.61 | 0.59 | 0     | 0     |
| Sugar crops                        | 0    | 0    | 0    | 0     | 0     |
| Vegetables                         | 0.01 | 0.04 | 0.01 | 0     | 0     |
| <b>United States of America</b>    |      |      |      |       |       |
| Cereals                            | 0    | 1.05 | 2.33 | 10.87 | 10.67 |
| Fiber                              | 0    | 0    | 0    | 0     | 0     |
| Fruit                              | 0    | 0.14 | 0.18 | 0.41  | 0.47  |
| Livestock                          | 0.01 | 3.98 | 6.37 | 18.14 | 12.39 |
| Oil crops                          | 0    | 0.03 | 0.08 | 0.37  | 0.37  |
| Pulses                             | 0    | 0    | 0.01 | 0.03  | 0.02  |
| Roots & tubers                     | 0    | 0.22 | 0.51 | 1.87  | 1.27  |
| Sugar crops                        | 0    | 0.01 | 0.03 | 0.2   | 0.23  |
| Vegetables                         | 0    | 0.28 | 0.56 | 2.23  | 1.82  |
| <b>Uruguay</b>                     |      |      |      |       |       |
| Cereals                            | 0    | 0    | 0    | 0.01  | 0.02  |
| Fiber                              | 0    | 0    | 0    | 0     | 0     |
| Fruit                              | 0    | 0    | 0    | 0     | 0.01  |
| Livestock                          | 0    | 0.02 | 0.03 | 0.11  | 0.48  |
| Oil crops                          | 0    | 0    | 0    | 0     | 0.01  |
| Pulses                             | 0    | 0    | 0    | 0     | 0     |
| Roots & tubers                     | 0    | 0.01 | 0.02 | 0.07  | 0.24  |
| Sugar crops                        | 0    | 0    | 0    | 0     | 0     |
| Vegetables                         | 0    | 0    | 0    | 0     | 0.01  |
| <b>Uzbekistan</b>                  |      |      |      |       |       |
| Cereals                            | 0    | 0.01 | 0    | 0     | 0     |
| Fiber                              | 0    | 0    | 0    | 0     | 0     |
| Fruit                              | 0    | 0.02 | 0.01 | 0.01  | 0.01  |
| Livestock                          | 0.12 | 0.87 | 0.36 | 0.25  | 0.18  |
| Oil crops                          | 0    | 0    | 0    | 0     | 0     |
| Pulses                             | 0    | 0    | 0    | 0     | 0     |

|                                           |      |      |      |      |      |
|-------------------------------------------|------|------|------|------|------|
| Roots & tubers                            | 0    | 0    | 0    | 0    | 0    |
| Sugar crops                               | 0    | 0    | 0    | 0    | 0    |
| Vegetables                                | 0.04 | 0.25 | 0.1  | 0.09 | 0.1  |
| <b>Venezuela (Bolivarian Republic of)</b> |      |      |      |      |      |
| Cereals                                   | 0    | 0.02 | 0.02 | 0.04 | 0.12 |
| Fiber                                     | 0    | 0    | 0    | 0    | 0    |
| Fruit                                     | 0    | 0.01 | 0.01 | 0.03 | 0.15 |
| Livestock                                 | 0.01 | 0.14 | 0.14 | 0.2  | 0.5  |
| Oil crops                                 | 0    | 0    | 0    | 0    | 0    |
| Pulses                                    | 0    | 0    | 0    | 0    | 0    |
| Roots & tubers                            | 0    | 0.01 | 0.01 | 0.02 | 0.05 |
| Sugar crops                               | 0    | 0    | 0    | 0    | 0    |
| Vegetables                                | 0    | 0.01 | 0.01 | 0.01 | 0.05 |
| <b>Viet Nam</b>                           |      |      |      |      |      |
| Cereals                                   | 0.12 | 0.2  | 0.01 | 0    | 0    |
| Fiber                                     | 0    | 0    | 0    | 0    | 0    |
| Fruit                                     | 0.04 | 0.08 | 0.01 | 0.02 | 0    |
| Livestock                                 | 0.18 | 0.29 | 0.01 | 0.06 | 0    |
| Oil crops                                 | 0    | 0    | 0    | 0    | 0    |
| Pulses                                    | 0    | 0.01 | 0    | 0    | 0    |
| Roots & tubers                            | 1.83 | 4.08 | 0.29 | 1.25 | 0    |
| Sugar crops                               | 0    | 0    | 0    | 0    | 0    |
| Vegetables                                | 0    | 0    | 0    | 0    | 0    |
| <b>Yemen</b>                              |      |      |      |      |      |
| Cereals                                   | 0    | 0    | 0    | 0    | 0    |
| Fiber                                     | 0    | 0    | 0    | 0    | 0    |
| Fruit                                     | 0    | 0.01 | 0    | 0    | 0    |
| Livestock                                 | 0.05 | 0.13 | 0.02 | 0.01 | 0    |
| Oil crops                                 | 0    | 0    | 0    | 0    | 0    |
| Pulses                                    | 0    | 0    | 0    | 0    | 0    |
| Roots & tubers                            | 0    | 0    | 0    | 0    | 0    |
| Sugar crops                               | 0    | 0    | 0    | 0    | 0    |
| Vegetables                                | 0.01 | 0.05 | 0.02 | 0.01 | 0    |
| <b>Zambia</b>                             |      |      |      |      |      |
| Cereals                                   | 0.02 | 0.06 | 0.01 | 0.02 | 0    |
| Fiber                                     | 0    | 0    | 0    | 0    | 0    |
| Fruit                                     | 0    | 0    | 0    | 0    | 0    |
| Livestock                                 | 0.02 | 0.05 | 0.01 | 0.01 | 0    |
| Oil crops                                 | 0    | 0    | 0    | 0    | 0    |
| Pulses                                    | 0    | 0    | 0    | 0    | 0    |
| Roots & tubers                            | 0.13 | 0.22 | 0.02 | 0.05 | 0    |
| Sugar crops                               | 0    | 0    | 0    | 0    | 0    |
| Vegetables                                | 0    | 0    | 0    | 0    | 0    |
| <b>Zimbabwe</b>                           |      |      |      |      |      |
| Cereals                                   | 0.01 | 0.07 | 0.01 | 0    | 0    |

|                |      |      |      |   |   |
|----------------|------|------|------|---|---|
| Fiber          | 0    | 0    | 0    | 0 | 0 |
| Fruit          | 0    | 0.01 | 0    | 0 | 0 |
| Livestock      | 0.07 | 0.11 | 0.01 | 0 | 0 |
| Oil crops      | 0    | 0    | 0    | 0 | 0 |
| Pulses         | 0    | 0    | 0    | 0 | 0 |
| Roots & tubers | 0    | 0.01 | 0    | 0 | 0 |
| Sugar crops    | 0    | 0    | 0    | 0 | 0 |
| Vegetables     | 0    | 0.01 | 0    | 0 | 0 |

**Vitamin B12 production (T)**

|                    | < 2<br>ha | 2 - 20 ha | 20 - 50 ha | 50 - 200 ha | > 200 ha |
|--------------------|-----------|-----------|------------|-------------|----------|
| <b>Afghanistan</b> |           |           |            |             |          |
| Cereals            | 0         | 0         | 0          | 0           | 0        |
| Fiber              | 0         | 0         | 0          | 0           | 0        |
| Fruit              | 0         | 0         | 0          | 0           | 0        |
| Livestock          | 0         | 0.01      | 0          | 0           | 0        |
| Oil crops          | 0         | 0         | 0          | 0           | 0        |
| Pulses             | 0         | 0         | 0          | 0           | 0        |
| Roots & tubers     | 0         | 0         | 0          | 0           | 0        |
| Sugar crops        | 0         | 0         | 0          | 0           | 0        |
| Vegetables         | 0         | 0         | 0          | 0           | 0        |
| <b>Albania</b>     |           |           |            |             |          |
| Cereals            | 0         | 0         | 0          | 0           | 0        |
| Fiber              | 0         | 0         | 0          | 0           | 0        |
| Fruit              | 0         | 0         | 0          | 0           | 0        |
| Livestock          | 0         | 0         | 0          | 0           | 0        |
| Oil crops          | 0         | 0         | 0          | 0           | 0        |
| Pulses             | 0         | 0         | 0          | 0           | 0        |
| Roots & tubers     | 0         | 0         | 0          | 0           | 0        |
| Sugar crops        | 0         | 0         | 0          | 0           | 0        |
| Vegetables         | 0         | 0         | 0          | 0           | 0        |
| <b>Algeria</b>     |           |           |            |             |          |
| Cereals            | 0         | 0         | 0          | 0           | 0        |
| Fiber              | 0         | 0         | 0          | 0           | 0        |
| Fruit              | 0         | 0         | 0          | 0           | 0        |
| Livestock          | 0         | 0.01      | 0          | 0           | 0        |
| Oil crops          | 0         | 0         | 0          | 0           | 0        |
| Pulses             | 0         | 0         | 0          | 0           | 0        |
| Roots & tubers     | 0         | 0         | 0          | 0           | 0        |
| Sugar crops        | 0         | 0         | 0          | 0           | 0        |
| Vegetables         | 0         | 0         | 0          | 0           | 0        |
| <b>Angola</b>      |           |           |            |             |          |
| Cereals            | 0         | 0         | 0          | 0           | 0        |
| Fiber              | 0         | 0         | 0          | 0           | 0        |
| Fruit              | 0         | 0         | 0          | 0           | 0        |

|                  |   |      |      |      |      |
|------------------|---|------|------|------|------|
| Livestock        | 0 | 0    | 0    | 0    | 0    |
| Oil crops        | 0 | 0    | 0    | 0    | 0    |
| Pulses           | 0 | 0    | 0    | 0    | 0    |
| Roots & tubers   | 0 | 0    | 0    | 0    | 0    |
| Sugar crops      | 0 | 0    | 0    | 0    | 0    |
| Vegetables       | 0 | 0    | 0    | 0    | 0    |
| <b>Argentina</b> |   |      |      |      |      |
| Cereals          | 0 | 0    | 0    | 0    | 0    |
| Fiber            | 0 | 0    | 0    | 0    | 0    |
| Fruit            | 0 | 0    | 0    | 0    | 0    |
| Livestock        | 0 | 0.01 | 0.01 | 0.02 | 0.06 |
| Oil crops        | 0 | 0    | 0    | 0    | 0    |
| Pulses           | 0 | 0    | 0    | 0    | 0    |
| Roots & tubers   | 0 | 0    | 0    | 0    | 0    |
| Sugar crops      | 0 | 0    | 0    | 0    | 0    |
| Vegetables       | 0 | 0    | 0    | 0    | 0    |
| <b>Armenia</b>   |   |      |      |      |      |
| Cereals          | 0 | 0    | 0    | 0    | 0    |
| Fiber            | 0 | 0    | 0    | 0    | 0    |
| Fruit            | 0 | 0    | 0    | 0    | 0    |
| Livestock        | 0 | 0    | 0    | 0    | 0    |
| Oil crops        | 0 | 0    | 0    | 0    | 0    |
| Pulses           | 0 | 0    | 0    | 0    | 0    |
| Roots & tubers   | 0 | 0    | 0    | 0    | 0    |
| Sugar crops      | 0 | 0    | 0    | 0    | 0    |
| Vegetables       | 0 | 0    | 0    | 0    | 0    |
| <b>Australia</b> |   |      |      |      |      |
| Cereals          | 0 | 0    | 0    | 0    | 0    |
| Fiber            | 0 | 0    | 0    | 0    | 0    |
| Fruit            | 0 | 0    | 0    | 0    | 0    |
| Livestock        | 0 | 0    | 0    | 0.01 | 0.07 |
| Oil crops        | 0 | 0    | 0    | 0    | 0    |
| Pulses           | 0 | 0    | 0    | 0    | 0    |
| Roots & tubers   | 0 | 0    | 0    | 0    | 0    |
| Sugar crops      | 0 | 0    | 0    | 0    | 0    |
| Vegetables       | 0 | 0    | 0    | 0    | 0    |
| <b>Austria</b>   |   |      |      |      |      |
| Cereals          | 0 | 0    | 0    | 0    | 0    |
| Fiber            | 0 | 0    | 0    | 0    | 0    |
| Fruit            | 0 | 0    | 0    | 0    | 0    |
| Livestock        | 0 | 0.01 | 0    | 0.01 | 0    |
| Oil crops        | 0 | 0    | 0    | 0    | 0    |
| Pulses           | 0 | 0    | 0    | 0    | 0    |
| Roots & tubers   | 0 | 0    | 0    | 0    | 0    |
| Sugar crops      | 0 | 0    | 0    | 0    | 0    |
| Vegetables       | 0 | 0    | 0    | 0    | 0    |



**Azerbaijan**

|                |   |   |   |   |   |
|----------------|---|---|---|---|---|
| Cereals        | 0 | 0 | 0 | 0 | 0 |
| Fiber          | 0 | 0 | 0 | 0 | 0 |
| Fruit          | 0 | 0 | 0 | 0 | 0 |
| Livestock      | 0 | 0 | 0 | 0 | 0 |
| Oil crops      | 0 | 0 | 0 | 0 | 0 |
| Pulses         | 0 | 0 | 0 | 0 | 0 |
| Roots & tubers | 0 | 0 | 0 | 0 | 0 |
| Sugar crops    | 0 | 0 | 0 | 0 | 0 |
| Vegetables     | 0 | 0 | 0 | 0 | 0 |

**Bangladesh**

|                |      |      |   |   |   |
|----------------|------|------|---|---|---|
| Cereals        | 0    | 0    | 0 | 0 | 0 |
| Fiber          | 0    | 0    | 0 | 0 | 0 |
| Fruit          | 0    | 0    | 0 | 0 | 0 |
| Livestock      | 0.01 | 0.01 | 0 | 0 | 0 |
| Oil crops      | 0    | 0    | 0 | 0 | 0 |
| Pulses         | 0    | 0    | 0 | 0 | 0 |
| Roots & tubers | 0    | 0    | 0 | 0 | 0 |
| Sugar crops    | 0    | 0    | 0 | 0 | 0 |
| Vegetables     | 0    | 0    | 0 | 0 | 0 |

**Belarus**

|                |   |      |   |      |   |
|----------------|---|------|---|------|---|
| Cereals        | 0 | 0    | 0 | 0    | 0 |
| Fiber          | 0 | 0    | 0 | 0    | 0 |
| Fruit          | 0 | 0    | 0 | 0    | 0 |
| Livestock      | 0 | 0.01 | 0 | 0.01 | 0 |
| Oil crops      | 0 | 0    | 0 | 0    | 0 |
| Pulses         | 0 | 0    | 0 | 0    | 0 |
| Roots & tubers | 0 | 0    | 0 | 0    | 0 |
| Sugar crops    | 0 | 0    | 0 | 0    | 0 |
| Vegetables     | 0 | 0    | 0 | 0    | 0 |

**Belgium**

|                |   |      |   |      |   |
|----------------|---|------|---|------|---|
| Cereals        | 0 | 0    | 0 | 0    | 0 |
| Fiber          | 0 | 0    | 0 | 0    | 0 |
| Fruit          | 0 | 0    | 0 | 0    | 0 |
| Livestock      | 0 | 0.01 | 0 | 0.01 | 0 |
| Oil crops      | 0 | 0    | 0 | 0    | 0 |
| Pulses         | 0 | 0    | 0 | 0    | 0 |
| Roots & tubers | 0 | 0    | 0 | 0    | 0 |
| Sugar crops    | 0 | 0    | 0 | 0    | 0 |
| Vegetables     | 0 | 0    | 0 | 0    | 0 |

**Belize**

|           |   |   |   |   |   |
|-----------|---|---|---|---|---|
| Cereals   | 0 | 0 | 0 | 0 | 0 |
| Fiber     | 0 | 0 | 0 | 0 | 0 |
| Fruit     | 0 | 0 | 0 | 0 | 0 |
| Livestock | 0 | 0 | 0 | 0 | 0 |
| Oil crops | 0 | 0 | 0 | 0 | 0 |

|                                         |   |   |   |   |   |
|-----------------------------------------|---|---|---|---|---|
| Pulses                                  | 0 | 0 | 0 | 0 | 0 |
| Roots & tubers                          | 0 | 0 | 0 | 0 | 0 |
| Sugar crops                             | 0 | 0 | 0 | 0 | 0 |
| Vegetables                              | 0 | 0 | 0 | 0 | 0 |
| <b>Benin</b>                            |   |   |   |   |   |
| Cereals                                 | 0 | 0 | 0 | 0 | 0 |
| Fiber                                   | 0 | 0 | 0 | 0 | 0 |
| Fruit                                   | 0 | 0 | 0 | 0 | 0 |
| Livestock                               | 0 | 0 | 0 | 0 | 0 |
| Oil crops                               | 0 | 0 | 0 | 0 | 0 |
| Pulses                                  | 0 | 0 | 0 | 0 | 0 |
| Roots & tubers                          | 0 | 0 | 0 | 0 | 0 |
| Sugar crops                             | 0 | 0 | 0 | 0 | 0 |
| Vegetables                              | 0 | 0 | 0 | 0 | 0 |
| <b>Bhutan</b>                           |   |   |   |   |   |
| Cereals                                 | 0 | 0 | 0 | 0 | 0 |
| Fiber                                   | 0 | 0 | 0 | 0 | 0 |
| Fruit                                   | 0 | 0 | 0 | 0 | 0 |
| Livestock                               | 0 | 0 | 0 | 0 | 0 |
| Oil crops                               | 0 | 0 | 0 | 0 | 0 |
| Pulses                                  | 0 | 0 | 0 | 0 | 0 |
| Roots & tubers                          | 0 | 0 | 0 | 0 | 0 |
| Sugar crops                             | 0 | 0 | 0 | 0 | 0 |
| Vegetables                              | 0 | 0 | 0 | 0 | 0 |
| <b>Bolivia (Plurinational State of)</b> |   |   |   |   |   |
| Cereals                                 | 0 | 0 | 0 | 0 | 0 |
| Fiber                                   | 0 | 0 | 0 | 0 | 0 |
| Fruit                                   | 0 | 0 | 0 | 0 | 0 |
| Livestock                               | 0 | 0 | 0 | 0 | 0 |
| Oil crops                               | 0 | 0 | 0 | 0 | 0 |
| Pulses                                  | 0 | 0 | 0 | 0 | 0 |
| Roots & tubers                          | 0 | 0 | 0 | 0 | 0 |
| Sugar crops                             | 0 | 0 | 0 | 0 | 0 |
| Vegetables                              | 0 | 0 | 0 | 0 | 0 |
| <b>Bosnia and Herzegovina</b>           |   |   |   |   |   |
| Cereals                                 | 0 | 0 | 0 | 0 | 0 |
| Fiber                                   | 0 | 0 | 0 | 0 | 0 |
| Fruit                                   | 0 | 0 | 0 | 0 | 0 |
| Livestock                               | 0 | 0 | 0 | 0 | 0 |
| Oil crops                               | 0 | 0 | 0 | 0 | 0 |
| Pulses                                  | 0 | 0 | 0 | 0 | 0 |
| Roots & tubers                          | 0 | 0 | 0 | 0 | 0 |
| Sugar crops                             | 0 | 0 | 0 | 0 | 0 |
| Vegetables                              | 0 | 0 | 0 | 0 | 0 |
| <b>Botswana</b>                         |   |   |   |   |   |

|                          |   |      |      |      |      |
|--------------------------|---|------|------|------|------|
| Cereals                  | 0 | 0    | 0    | 0    | 0    |
| Fiber                    | 0 | 0    | 0    | 0    | 0    |
| Fruit                    | 0 | 0    | 0    | 0    | 0    |
| Livestock                | 0 | 0    | 0    | 0    | 0    |
| Oil crops                | 0 | 0    | 0    | 0    | 0    |
| Pulses                   | 0 | 0    | 0    | 0    | 0    |
| Roots & tubers           | 0 | 0    | 0    | 0    | 0    |
| Sugar crops              | 0 | 0    | 0    | 0    | 0    |
| Vegetables               | 0 | 0    | 0    | 0    | 0    |
| <b>Brazil</b>            |   |      |      |      |      |
| Cereals                  | 0 | 0    | 0    | 0    | 0    |
| Fiber                    | 0 | 0    | 0    | 0    | 0    |
| Fruit                    | 0 | 0    | 0    | 0    | 0    |
| Livestock                | 0 | 0.03 | 0.02 | 0.05 | 0.17 |
| Oil crops                | 0 | 0    | 0    | 0    | 0    |
| Pulses                   | 0 | 0    | 0    | 0    | 0    |
| Roots & tubers           | 0 | 0    | 0    | 0    | 0    |
| Sugar crops              | 0 | 0    | 0    | 0    | 0    |
| Vegetables               | 0 | 0    | 0    | 0    | 0    |
| <b>Brunei Darussalam</b> |   |      |      |      |      |
| Cereals                  | 0 | 0    | 0    | 0    | 0    |
| Fiber                    | 0 | 0    | 0    | 0    | 0    |
| Fruit                    | 0 | 0    | 0    | 0    | 0    |
| Livestock                | 0 | 0    | 0    | 0    | 0    |
| Oil crops                | 0 | 0    | 0    | 0    | 0    |
| Pulses                   | 0 | 0    | 0    | 0    | 0    |
| Roots & tubers           | 0 | 0    | 0    | 0    | 0    |
| Sugar crops              | 0 | 0    | 0    | 0    | 0    |
| Vegetables               | 0 | 0    | 0    | 0    | 0    |
| <b>Bulgaria</b>          |   |      |      |      |      |
| Cereals                  | 0 | 0    | 0    | 0    | 0    |
| Fiber                    | 0 | 0    | 0    | 0    | 0    |
| Fruit                    | 0 | 0    | 0    | 0    | 0    |
| Livestock                | 0 | 0    | 0    | 0    | 0    |
| Oil crops                | 0 | 0    | 0    | 0    | 0    |
| Pulses                   | 0 | 0    | 0    | 0    | 0    |
| Roots & tubers           | 0 | 0    | 0    | 0    | 0    |
| Sugar crops              | 0 | 0    | 0    | 0    | 0    |
| Vegetables               | 0 | 0    | 0    | 0    | 0    |
| <b>Burkina Faso</b>      |   |      |      |      |      |
| Cereals                  | 0 | 0    | 0    | 0    | 0    |
| Fiber                    | 0 | 0    | 0    | 0    | 0    |
| Fruit                    | 0 | 0    | 0    | 0    | 0    |
| Livestock                | 0 | 0    | 0    | 0    | 0    |
| Oil crops                | 0 | 0    | 0    | 0    | 0    |
| Pulses                   | 0 | 0    | 0    | 0    | 0    |

|                                 |   |      |      |      |      |
|---------------------------------|---|------|------|------|------|
| Roots & tubers                  | 0 | 0    | 0    | 0    | 0    |
| Sugar crops                     | 0 | 0    | 0    | 0    | 0    |
| Vegetables                      | 0 | 0    | 0    | 0    | 0    |
| <b>Burundi</b>                  |   |      |      |      |      |
| Cereals                         | 0 | 0    | 0    | 0    | 0    |
| Fiber                           | 0 | 0    | 0    | 0    | 0    |
| Fruit                           | 0 | 0    | 0    | 0    | 0    |
| Livestock                       | 0 | 0    | 0    | 0    | 0    |
| Oil crops                       | 0 | 0    | 0    | 0    | 0    |
| Pulses                          | 0 | 0    | 0    | 0    | 0    |
| Roots & tubers                  | 0 | 0    | 0    | 0    | 0    |
| Sugar crops                     | 0 | 0    | 0    | 0    | 0    |
| Vegetables                      | 0 | 0    | 0    | 0    | 0    |
| <b>Cambodia</b>                 |   |      |      |      |      |
| Cereals                         | 0 | 0    | 0    | 0    | 0    |
| Fiber                           | 0 | 0    | 0    | 0    | 0    |
| Fruit                           | 0 | 0    | 0    | 0    | 0    |
| Livestock                       | 0 | 0    | 0    | 0    | 0    |
| Oil crops                       | 0 | 0    | 0    | 0    | 0    |
| Pulses                          | 0 | 0    | 0    | 0    | 0    |
| Roots & tubers                  | 0 | 0    | 0    | 0    | 0    |
| Sugar crops                     | 0 | 0    | 0    | 0    | 0    |
| Vegetables                      | 0 | 0    | 0    | 0    | 0    |
| <b>Cameroon</b>                 |   |      |      |      |      |
| Cereals                         | 0 | 0    | 0    | 0    | 0    |
| Fiber                           | 0 | 0    | 0    | 0    | 0    |
| Fruit                           | 0 | 0    | 0    | 0    | 0    |
| Livestock                       | 0 | 0    | 0    | 0    | 0    |
| Oil crops                       | 0 | 0    | 0    | 0    | 0    |
| Pulses                          | 0 | 0    | 0    | 0    | 0    |
| Roots & tubers                  | 0 | 0    | 0    | 0    | 0    |
| Sugar crops                     | 0 | 0    | 0    | 0    | 0    |
| Vegetables                      | 0 | 0    | 0    | 0    | 0    |
| <b>Canada</b>                   |   |      |      |      |      |
| Cereals                         | 0 | 0    | 0    | 0    | 0    |
| Fiber                           | 0 | 0    | 0    | 0    | 0    |
| Fruit                           | 0 | 0    | 0    | 0    | 0    |
| Livestock                       | 0 | 0.01 | 0.01 | 0.03 | 0.02 |
| Oil crops                       | 0 | 0    | 0    | 0    | 0    |
| Pulses                          | 0 | 0    | 0    | 0    | 0    |
| Roots & tubers                  | 0 | 0    | 0    | 0    | 0    |
| Sugar crops                     | 0 | 0    | 0    | 0    | 0    |
| Vegetables                      | 0 | 0    | 0    | 0    | 0    |
| <b>Central African Republic</b> |   |      |      |      |      |
| Cereals                         | 0 | 0    | 0    | 0    | 0    |
| Fiber                           | 0 | 0    | 0    | 0    | 0    |

|                 |      |      |   |      |      |
|-----------------|------|------|---|------|------|
| Fruit           | 0    | 0    | 0 | 0    | 0    |
| Oil crops       | 0    | 0    | 0 | 0    | 0    |
| Pulses          | 0    | 0    | 0 | 0    | 0    |
| Roots & tubers  | 0    | 0    | 0 | 0    | 0    |
| Sugar crops     | 0    | 0    | 0 | 0    | 0    |
| Vegetables      | 0    | 0    | 0 | 0    | 0    |
| <b>Chad</b>     |      |      |   |      |      |
| Cereals         | 0    | 0    | 0 | 0    | 0    |
| Fiber           | 0    | 0    | 0 | 0    | 0    |
| Fruit           | 0    | 0    | 0 | 0    | 0    |
| Livestock       | 0    | 0    | 0 | 0    | 0    |
| Oil crops       | 0    | 0    | 0 | 0    | 0    |
| Pulses          | 0    | 0    | 0 | 0    | 0    |
| Roots & tubers  | 0    | 0    | 0 | 0    | 0    |
| Sugar crops     | 0    | 0    | 0 | 0    | 0    |
| Vegetables      | 0    | 0    | 0 | 0    | 0    |
| <b>Chile</b>    |      |      |   |      |      |
| Cereals         | 0    | 0    | 0 | 0    | 0    |
| Fiber           | 0    | 0    | 0 | 0    | 0    |
| Fruit           | 0    | 0    | 0 | 0    | 0    |
| Livestock       | 0    | 0    | 0 | 0    | 0.01 |
| Oil crops       | 0    | 0    | 0 | 0    | 0    |
| Pulses          | 0    | 0    | 0 | 0    | 0    |
| Roots & tubers  | 0    | 0    | 0 | 0    | 0    |
| Sugar crops     | 0    | 0    | 0 | 0    | 0    |
| Vegetables      | 0    | 0    | 0 | 0    | 0    |
| <b>China</b>    |      |      |   |      |      |
| Cereals         | 0    | 0    | 0 | 0    | 0    |
| Fiber           | 0    | 0    | 0 | 0    | 0    |
| Fruit           | 0    | 0    | 0 | 0    | 0    |
| Livestock       | 0.45 | 0.19 | 0 | 0.08 | 0    |
| Oil crops       | 0    | 0    | 0 | 0    | 0    |
| Pulses          | 0    | 0    | 0 | 0    | 0    |
| Roots & tubers  | 0    | 0    | 0 | 0    | 0    |
| Sugar crops     | 0    | 0    | 0 | 0    | 0    |
| Vegetables      | 0    | 0    | 0 | 0    | 0    |
| <b>Colombia</b> |      |      |   |      |      |
| Cereals         | 0    | 0    | 0 | 0    | 0    |
| Fiber           | 0    | 0    | 0 | 0    | 0    |
| Fruit           | 0    | 0    | 0 | 0    | 0    |
| Livestock       | 0    | 0    | 0 | 0.01 | 0.02 |
| Oil crops       | 0    | 0    | 0 | 0    | 0    |
| Pulses          | 0    | 0    | 0 | 0    | 0    |
| Roots & tubers  | 0    | 0    | 0 | 0    | 0    |
| Sugar crops     | 0    | 0    | 0 | 0    | 0    |
| Vegetables      | 0    | 0    | 0 | 0    | 0    |

|                   |   |   |   |   |   |
|-------------------|---|---|---|---|---|
| <b>Congo</b>      |   |   |   |   |   |
| Cereals           | 0 | 0 | 0 | 0 | 0 |
| Fiber             | 0 | 0 | 0 | 0 | 0 |
| Fruit             | 0 | 0 | 0 | 0 | 0 |
| Livestock         | 0 | 0 | 0 | 0 | 0 |
| Oil crops         | 0 | 0 | 0 | 0 | 0 |
| Pulses            | 0 | 0 | 0 | 0 | 0 |
| Roots & tubers    | 0 | 0 | 0 | 0 | 0 |
| Sugar crops       | 0 | 0 | 0 | 0 | 0 |
| Vegetables        | 0 | 0 | 0 | 0 | 0 |
| <b>Costa Rica</b> |   |   |   |   |   |
| Cereals           | 0 | 0 | 0 | 0 | 0 |
| Fiber             | 0 | 0 | 0 | 0 | 0 |
| Fruit             | 0 | 0 | 0 | 0 | 0 |
| Livestock         | 0 | 0 | 0 | 0 | 0 |
| Oil crops         | 0 | 0 | 0 | 0 | 0 |
| Pulses            | 0 | 0 | 0 | 0 | 0 |
| Roots & tubers    | 0 | 0 | 0 | 0 | 0 |
| Sugar crops       | 0 | 0 | 0 | 0 | 0 |
| Vegetables        | 0 | 0 | 0 | 0 | 0 |
| <b>Croatia</b>    |   |   |   |   |   |
| Cereals           | 0 | 0 | 0 | 0 | 0 |
| Fiber             | 0 | 0 | 0 | 0 | 0 |
| Fruit             | 0 | 0 | 0 | 0 | 0 |
| Livestock         | 0 | 0 | 0 | 0 | 0 |
| Oil crops         | 0 | 0 | 0 | 0 | 0 |
| Pulses            | 0 | 0 | 0 | 0 | 0 |
| Roots & tubers    | 0 | 0 | 0 | 0 | 0 |
| Sugar crops       | 0 | 0 | 0 | 0 | 0 |
| Vegetables        | 0 | 0 | 0 | 0 | 0 |
| <b>Cuba</b>       |   |   |   |   |   |
| Cereals           | 0 | 0 | 0 | 0 | 0 |
| Fiber             | 0 | 0 | 0 | 0 | 0 |
| Fruit             | 0 | 0 | 0 | 0 | 0 |
| Livestock         | 0 | 0 | 0 | 0 | 0 |
| Oil crops         | 0 | 0 | 0 | 0 | 0 |
| Pulses            | 0 | 0 | 0 | 0 | 0 |
| Roots & tubers    | 0 | 0 | 0 | 0 | 0 |
| Sugar crops       | 0 | 0 | 0 | 0 | 0 |
| Vegetables        | 0 | 0 | 0 | 0 | 0 |
| <b>Cyprus</b>     |   |   |   |   |   |
| Cereals           | 0 | 0 | 0 | 0 | 0 |
| Fiber             | 0 | 0 | 0 | 0 | 0 |
| Fruit             | 0 | 0 | 0 | 0 | 0 |
| Livestock         | 0 | 0 | 0 | 0 | 0 |
| Oil crops         | 0 | 0 | 0 | 0 | 0 |

|                                         |   |      |   |      |   |
|-----------------------------------------|---|------|---|------|---|
| Pulses                                  | 0 | 0    | 0 | 0    | 0 |
| Roots & tubers                          | 0 | 0    | 0 | 0    | 0 |
| Sugar crops                             | 0 | 0    | 0 | 0    | 0 |
| Vegetables                              | 0 | 0    | 0 | 0    | 0 |
| <b>Czech Republic</b>                   |   |      |   |      |   |
| Cereals                                 | 0 | 0    | 0 | 0    | 0 |
| Fiber                                   | 0 | 0    | 0 | 0    | 0 |
| Fruit                                   | 0 | 0    | 0 | 0    | 0 |
| Livestock                               | 0 | 0    | 0 | 0.01 | 0 |
| Oil crops                               | 0 | 0    | 0 | 0    | 0 |
| Pulses                                  | 0 | 0    | 0 | 0    | 0 |
| Roots & tubers                          | 0 | 0    | 0 | 0    | 0 |
| Sugar crops                             | 0 | 0    | 0 | 0    | 0 |
| Vegetables                              | 0 | 0    | 0 | 0    | 0 |
| <b>Democratic Republic of the Congo</b> |   |      |   |      |   |
| Cereals                                 | 0 | 0    | 0 | 0    | 0 |
| Fiber                                   | 0 | 0    | 0 | 0    | 0 |
| Fruit                                   | 0 | 0    | 0 | 0    | 0 |
| Livestock                               | 0 | 0    | 0 | 0    | 0 |
| Oil crops                               | 0 | 0    | 0 | 0    | 0 |
| Pulses                                  | 0 | 0    | 0 | 0    | 0 |
| Roots & tubers                          | 0 | 0    | 0 | 0    | 0 |
| Sugar crops                             | 0 | 0    | 0 | 0    | 0 |
| Vegetables                              | 0 | 0    | 0 | 0    | 0 |
| <b>Denmark</b>                          |   |      |   |      |   |
| Cereals                                 | 0 | 0    | 0 | 0    | 0 |
| Fiber                                   | 0 | 0    | 0 | 0    | 0 |
| Fruit                                   | 0 | 0    | 0 | 0    | 0 |
| Livestock                               | 0 | 0.01 | 0 | 0.01 | 0 |
| Oil crops                               | 0 | 0    | 0 | 0    | 0 |
| Pulses                                  | 0 | 0    | 0 | 0    | 0 |
| Roots & tubers                          | 0 | 0    | 0 | 0    | 0 |
| Sugar crops                             | 0 | 0    | 0 | 0    | 0 |
| Vegetables                              | 0 | 0    | 0 | 0    | 0 |
| <b>Djibouti</b>                         |   |      |   |      |   |
| Cereals                                 | 0 | 0    | 0 | 0    | 0 |
| Fiber                                   | 0 | 0    | 0 | 0    | 0 |
| Fruit                                   | 0 | 0    | 0 | 0    | 0 |
| Livestock                               | 0 | 0    | 0 | 0    | 0 |
| Oil crops                               | 0 | 0    | 0 | 0    | 0 |
| Pulses                                  | 0 | 0    | 0 | 0    | 0 |
| Roots & tubers                          | 0 | 0    | 0 | 0    | 0 |
| Sugar crops                             | 0 | 0    | 0 | 0    | 0 |
| Vegetables                              | 0 | 0    | 0 | 0    | 0 |
| <b>Dominica</b>                         |   |      |   |      |   |

|                          |   |      |      |   |      |
|--------------------------|---|------|------|---|------|
| Cereals                  | 0 | 0    | 0    | 0 | 0    |
| Fiber                    | 0 | 0    | 0    | 0 | 0    |
| Fruit                    | 0 | 0    | 0    | 0 | 0    |
| Livestock                | 0 | 0    | 0    | 0 | 0    |
| Oil crops                | 0 | 0    | 0    | 0 | 0    |
| Pulses                   | 0 | 0    | 0    | 0 | 0    |
| Roots & tubers           | 0 | 0    | 0    | 0 | 0    |
| Sugar crops              | 0 | 0    | 0    | 0 | 0    |
| Vegetables               | 0 | 0    | 0    | 0 | 0    |
| <b>Ecuador</b>           |   |      |      |   |      |
| Cereals                  | 0 | 0    | 0    | 0 | 0    |
| Fiber                    | 0 | 0    | 0    | 0 | 0    |
| Fruit                    | 0 | 0    | 0    | 0 | 0    |
| Livestock                | 0 | 0    | 0    | 0 | 0.01 |
| Oil crops                | 0 | 0    | 0    | 0 | 0    |
| Pulses                   | 0 | 0    | 0    | 0 | 0    |
| Roots & tubers           | 0 | 0    | 0    | 0 | 0    |
| Sugar crops              | 0 | 0    | 0    | 0 | 0    |
| Vegetables               | 0 | 0    | 0    | 0 | 0    |
| <b>Egypt</b>             |   |      |      |   |      |
| Cereals                  | 0 | 0    | 0    | 0 | 0    |
| Fiber                    | 0 | 0    | 0    | 0 | 0    |
| Fruit                    | 0 | 0    | 0    | 0 | 0    |
| Livestock                | 0 | 0.02 | 0.01 | 0 | 0    |
| Oil crops                | 0 | 0    | 0    | 0 | 0    |
| Pulses                   | 0 | 0    | 0    | 0 | 0    |
| Roots & tubers           | 0 | 0    | 0    | 0 | 0    |
| Sugar crops              | 0 | 0    | 0    | 0 | 0    |
| Vegetables               | 0 | 0    | 0    | 0 | 0    |
| <b>El Salvador</b>       |   |      |      |   |      |
| Cereals                  | 0 | 0    | 0    | 0 | 0    |
| Fiber                    | 0 | 0    | 0    | 0 | 0    |
| Fruit                    | 0 | 0    | 0    | 0 | 0    |
| Livestock                | 0 | 0    | 0    | 0 | 0    |
| Oil crops                | 0 | 0    | 0    | 0 | 0    |
| Pulses                   | 0 | 0    | 0    | 0 | 0    |
| Roots & tubers           | 0 | 0    | 0    | 0 | 0    |
| Sugar crops              | 0 | 0    | 0    | 0 | 0    |
| Vegetables               | 0 | 0    | 0    | 0 | 0    |
| <b>Equatorial Guinea</b> |   |      |      |   |      |
| Cereals                  | 0 | 0    | 0    | 0 | 0    |
| Fiber                    | 0 | 0    | 0    | 0 | 0    |
| Fruit                    | 0 | 0    | 0    | 0 | 0    |
| Livestock                | 0 | 0    | 0    | 0 | 0    |
| Oil crops                | 0 | 0    | 0    | 0 | 0    |
| Pulses                   | 0 | 0    | 0    | 0 | 0    |



|                 |      |      |   |   |   |
|-----------------|------|------|---|---|---|
| Roots & tubers  | 0    | 0    | 0 | 0 | 0 |
| Sugar crops     | 0    | 0    | 0 | 0 | 0 |
| Vegetables      | 0    | 0    | 0 | 0 | 0 |
| <b>Eritrea</b>  |      |      |   |   |   |
| Cereals         | 0    | 0    | 0 | 0 | 0 |
| Fiber           | 0    | 0    | 0 | 0 | 0 |
| Fruit           | 0    | 0    | 0 | 0 | 0 |
| Livestock       | 0    | 0    | 0 | 0 | 0 |
| Oil crops       | 0    | 0    | 0 | 0 | 0 |
| Pulses          | 0    | 0    | 0 | 0 | 0 |
| Roots & tubers  | 0    | 0    | 0 | 0 | 0 |
| Sugar crops     | 0    | 0    | 0 | 0 | 0 |
| Vegetables      | 0    | 0    | 0 | 0 | 0 |
| <b>Estonia</b>  |      |      |   |   |   |
| Cereals         | 0    | 0    | 0 | 0 | 0 |
| Fiber           | 0    | 0    | 0 | 0 | 0 |
| Fruit           | 0    | 0    | 0 | 0 | 0 |
| Livestock       | 0    | 0    | 0 | 0 | 0 |
| Oil crops       | 0    | 0    | 0 | 0 | 0 |
| Pulses          | 0    | 0    | 0 | 0 | 0 |
| Roots & tubers  | 0    | 0    | 0 | 0 | 0 |
| Sugar crops     | 0    | 0    | 0 | 0 | 0 |
| Vegetables      | 0    | 0    | 0 | 0 | 0 |
| <b>Ethiopia</b> |      |      |   |   |   |
| Cereals         | 0    | 0    | 0 | 0 | 0 |
| Fiber           | 0    | 0    | 0 | 0 | 0 |
| Fruit           | 0    | 0    | 0 | 0 | 0 |
| Livestock       | 0.01 | 0.01 | 0 | 0 | 0 |
| Oil crops       | 0    | 0    | 0 | 0 | 0 |
| Pulses          | 0    | 0    | 0 | 0 | 0 |
| Roots & tubers  | 0    | 0    | 0 | 0 | 0 |
| Sugar crops     | 0    | 0    | 0 | 0 | 0 |
| Vegetables      | 0    | 0    | 0 | 0 | 0 |
| <b>Finland</b>  |      |      |   |   |   |
| Cereals         | 0    | 0    | 0 | 0 | 0 |
| Fiber           | 0    | 0    | 0 | 0 | 0 |
| Fruit           | 0    | 0    | 0 | 0 | 0 |
| Livestock       | 0    | 0    | 0 | 0 | 0 |
| Oil crops       | 0    | 0    | 0 | 0 | 0 |
| Pulses          | 0    | 0    | 0 | 0 | 0 |
| Roots & tubers  | 0    | 0    | 0 | 0 | 0 |
| Sugar crops     | 0    | 0    | 0 | 0 | 0 |
| Vegetables      | 0    | 0    | 0 | 0 | 0 |
| <b>France</b>   |      |      |   |   |   |
| Cereals         | 0    | 0    | 0 | 0 | 0 |
| Fiber           | 0    | 0    | 0 | 0 | 0 |

|                |      |      |      |      |      |
|----------------|------|------|------|------|------|
| Fruit          | 0    | 0    | 0    | 0    | 0    |
| Livestock      | 0.01 | 0.05 | 0.02 | 0.05 | 0.01 |
| Oil crops      | 0    | 0    | 0    | 0    | 0    |
| Pulses         | 0    | 0    | 0    | 0    | 0    |
| Roots & tubers | 0    | 0    | 0    | 0    | 0    |
| Sugar crops    | 0    | 0    | 0    | 0    | 0    |
| Vegetables     | 0    | 0    | 0    | 0    | 0    |
| <b>Gabon</b>   |      |      |      |      |      |
| Cereals        | 0    | 0    | 0    | 0    | 0    |
| Fiber          | 0    | 0    | 0    | 0    | 0    |
| Fruit          | 0    | 0    | 0    | 0    | 0    |
| Livestock      | 0    | 0    | 0    | 0    | 0    |
| Oil crops      | 0    | 0    | 0    | 0    | 0    |
| Pulses         | 0    | 0    | 0    | 0    | 0    |
| Roots & tubers | 0    | 0    | 0    | 0    | 0    |
| Sugar crops    | 0    | 0    | 0    | 0    | 0    |
| Vegetables     | 0    | 0    | 0    | 0    | 0    |
| <b>Gambia</b>  |      |      |      |      |      |
| Cereals        | 0    | 0    | 0    | 0    | 0    |
| Fiber          | 0    | 0    | 0    | 0    | 0    |
| Fruit          | 0    | 0    | 0    | 0    | 0    |
| Livestock      | 0    | 0    | 0    | 0    | 0    |
| Oil crops      | 0    | 0    | 0    | 0    | 0    |
| Pulses         | 0    | 0    | 0    | 0    | 0    |
| Roots & tubers | 0    | 0    | 0    | 0    | 0    |
| Sugar crops    | 0    | 0    | 0    | 0    | 0    |
| Vegetables     | 0    | 0    | 0    | 0    | 0    |
| <b>Georgia</b> |      |      |      |      |      |
| Cereals        | 0    | 0    | 0    | 0    | 0    |
| Fiber          | 0    | 0    | 0    | 0    | 0    |
| Fruit          | 0    | 0    | 0    | 0    | 0    |
| Livestock      | 0    | 0    | 0    | 0    | 0    |
| Oil crops      | 0    | 0    | 0    | 0    | 0    |
| Pulses         | 0    | 0    | 0    | 0    | 0    |
| Roots & tubers | 0    | 0    | 0    | 0    | 0    |
| Sugar crops    | 0    | 0    | 0    | 0    | 0    |
| Vegetables     | 0    | 0    | 0    | 0    | 0    |
| <b>Germany</b> |      |      |      |      |      |
| Cereals        | 0    | 0    | 0    | 0    | 0    |
| Fiber          | 0    | 0    | 0    | 0    | 0    |
| Fruit          | 0    | 0    | 0    | 0    | 0    |
| Livestock      | 0.01 | 0.03 | 0.02 | 0.07 | 0.03 |
| Oil crops      | 0    | 0    | 0    | 0    | 0    |
| Pulses         | 0    | 0    | 0    | 0    | 0    |
| Roots & tubers | 0    | 0    | 0    | 0    | 0    |
| Sugar crops    | 0    | 0    | 0    | 0    | 0    |

|                  |   |      |   |   |   |
|------------------|---|------|---|---|---|
| Vegetables       | 0 | 0    | 0 | 0 | 0 |
| <b>Ghana</b>     |   |      |   |   |   |
| Cereals          | 0 | 0    | 0 | 0 | 0 |
| Fiber            | 0 | 0    | 0 | 0 | 0 |
| Fruit            | 0 | 0    | 0 | 0 | 0 |
| Livestock        | 0 | 0    | 0 | 0 | 0 |
| Oil crops        | 0 | 0    | 0 | 0 | 0 |
| Pulses           | 0 | 0    | 0 | 0 | 0 |
| Roots & tubers   | 0 | 0    | 0 | 0 | 0 |
| Sugar crops      | 0 | 0    | 0 | 0 | 0 |
| Vegetables       | 0 | 0    | 0 | 0 | 0 |
| <b>Greece</b>    |   |      |   |   |   |
| Cereals          | 0 | 0    | 0 | 0 | 0 |
| Fiber            | 0 | 0    | 0 | 0 | 0 |
| Fruit            | 0 | 0    | 0 | 0 | 0 |
| Livestock        | 0 | 0.01 | 0 | 0 | 0 |
| Oil crops        | 0 | 0    | 0 | 0 | 0 |
| Pulses           | 0 | 0    | 0 | 0 | 0 |
| Roots & tubers   | 0 | 0    | 0 | 0 | 0 |
| Sugar crops      | 0 | 0    | 0 | 0 | 0 |
| Vegetables       | 0 | 0    | 0 | 0 | 0 |
| <b>Grenada</b>   |   |      |   |   |   |
| Cereals          | 0 | 0    | 0 | 0 | 0 |
| Fiber            | 0 | 0    | 0 | 0 | 0 |
| Fruit            | 0 | 0    | 0 | 0 | 0 |
| Livestock        | 0 | 0    | 0 | 0 | 0 |
| Oil crops        | 0 | 0    | 0 | 0 | 0 |
| Pulses           | 0 | 0    | 0 | 0 | 0 |
| Roots & tubers   | 0 | 0    | 0 | 0 | 0 |
| Sugar crops      | 0 | 0    | 0 | 0 | 0 |
| Vegetables       | 0 | 0    | 0 | 0 | 0 |
| <b>Guatemala</b> |   |      |   |   |   |
| Cereals          | 0 | 0    | 0 | 0 | 0 |
| Fiber            | 0 | 0    | 0 | 0 | 0 |
| Fruit            | 0 | 0    | 0 | 0 | 0 |
| Livestock        | 0 | 0    | 0 | 0 | 0 |
| Oil crops        | 0 | 0    | 0 | 0 | 0 |
| Pulses           | 0 | 0    | 0 | 0 | 0 |
| Roots & tubers   | 0 | 0    | 0 | 0 | 0 |
| Sugar crops      | 0 | 0    | 0 | 0 | 0 |
| Vegetables       | 0 | 0    | 0 | 0 | 0 |
| <b>Guinea</b>    |   |      |   |   |   |
| Cereals          | 0 | 0    | 0 | 0 | 0 |
| Fiber            | 0 | 0    | 0 | 0 | 0 |
| Fruit            | 0 | 0    | 0 | 0 | 0 |
| Livestock        | 0 | 0    | 0 | 0 | 0 |

|                      |   |   |   |   |   |
|----------------------|---|---|---|---|---|
| Oil crops            | 0 | 0 | 0 | 0 | 0 |
| Pulses               | 0 | 0 | 0 | 0 | 0 |
| Roots & tubers       | 0 | 0 | 0 | 0 | 0 |
| Sugar crops          | 0 | 0 | 0 | 0 | 0 |
| Vegetables           | 0 | 0 | 0 | 0 | 0 |
| <b>Guinea-Bissau</b> |   |   |   |   |   |
| Cereals              | 0 | 0 | 0 | 0 | 0 |
| Fiber                | 0 | 0 | 0 | 0 | 0 |
| Fruit                | 0 | 0 | 0 | 0 | 0 |
| Livestock            | 0 | 0 | 0 | 0 | 0 |
| Oil crops            | 0 | 0 | 0 | 0 | 0 |
| Pulses               | 0 | 0 | 0 | 0 | 0 |
| Roots & tubers       | 0 | 0 | 0 | 0 | 0 |
| Sugar crops          | 0 | 0 | 0 | 0 | 0 |
| Vegetables           | 0 | 0 | 0 | 0 | 0 |
| <b>Guyana</b>        |   |   |   |   |   |
| Cereals              | 0 | 0 | 0 | 0 | 0 |
| Fiber                | 0 | 0 | 0 | 0 | 0 |
| Fruit                | 0 | 0 | 0 | 0 | 0 |
| Livestock            | 0 | 0 | 0 | 0 | 0 |
| Oil crops            | 0 | 0 | 0 | 0 | 0 |
| Pulses               | 0 | 0 | 0 | 0 | 0 |
| Roots & tubers       | 0 | 0 | 0 | 0 | 0 |
| Sugar crops          | 0 | 0 | 0 | 0 | 0 |
| Vegetables           | 0 | 0 | 0 | 0 | 0 |
| <b>Haiti</b>         |   |   |   |   |   |
| Cereals              | 0 | 0 | 0 | 0 | 0 |
| Fiber                | 0 | 0 | 0 | 0 | 0 |
| Fruit                | 0 | 0 | 0 | 0 | 0 |
| Livestock            | 0 | 0 | 0 | 0 | 0 |
| Oil crops            | 0 | 0 | 0 | 0 | 0 |
| Pulses               | 0 | 0 | 0 | 0 | 0 |
| Roots & tubers       | 0 | 0 | 0 | 0 | 0 |
| Sugar crops          | 0 | 0 | 0 | 0 | 0 |
| Vegetables           | 0 | 0 | 0 | 0 | 0 |
| <b>Honduras</b>      |   |   |   |   |   |
| Cereals              | 0 | 0 | 0 | 0 | 0 |
| Fiber                | 0 | 0 | 0 | 0 | 0 |
| Fruit                | 0 | 0 | 0 | 0 | 0 |
| Livestock            | 0 | 0 | 0 | 0 | 0 |
| Oil crops            | 0 | 0 | 0 | 0 | 0 |
| Pulses               | 0 | 0 | 0 | 0 | 0 |
| Roots & tubers       | 0 | 0 | 0 | 0 | 0 |
| Sugar crops          | 0 | 0 | 0 | 0 | 0 |
| Vegetables           | 0 | 0 | 0 | 0 | 0 |
| <b>Hungary</b>       |   |   |   |   |   |

|                                   |      |      |      |      |   |
|-----------------------------------|------|------|------|------|---|
| Cereals                           | 0    | 0    | 0    | 0    | 0 |
| Fiber                             | 0    | 0    | 0    | 0    | 0 |
| Fruit                             | 0    | 0    | 0    | 0    | 0 |
| Livestock                         | 0    | 0    | 0    | 0    | 0 |
| Oil crops                         | 0    | 0    | 0    | 0    | 0 |
| Pulses                            | 0    | 0    | 0    | 0    | 0 |
| Roots & tubers                    | 0    | 0    | 0    | 0    | 0 |
| Sugar crops                       | 0    | 0    | 0    | 0    | 0 |
| Vegetables                        | 0    | 0    | 0    | 0    | 0 |
| <b>Iceland</b>                    |      |      |      |      |   |
| Cereals                           | 0    | 0    | 0    | 0    | 0 |
| Fiber                             | 0    | 0    | 0    | 0    | 0 |
| Fruit                             | 0    | 0    | 0    | 0    | 0 |
| Livestock                         | 0    | 0    | 0    | 0    | 0 |
| Oil crops                         | 0    | 0    | 0    | 0    | 0 |
| Pulses                            | 0    | 0    | 0    | 0    | 0 |
| Roots & tubers                    | 0    | 0    | 0    | 0    | 0 |
| Sugar crops                       | 0    | 0    | 0    | 0    | 0 |
| Vegetables                        | 0    | 0    | 0    | 0    | 0 |
| <b>India</b>                      |      |      |      |      |   |
| Cereals                           | 0    | 0    | 0    | 0    | 0 |
| Fiber                             | 0    | 0    | 0    | 0    | 0 |
| Fruit                             | 0    | 0    | 0    | 0    | 0 |
| Livestock                         | 0.12 | 0.27 | 0.03 | 0.01 | 0 |
| Oil crops                         | 0    | 0    | 0    | 0    | 0 |
| Pulses                            | 0    | 0    | 0    | 0    | 0 |
| Roots & tubers                    | 0    | 0    | 0    | 0    | 0 |
| Sugar crops                       | 0    | 0    | 0    | 0    | 0 |
| Vegetables                        | 0    | 0    | 0    | 0    | 0 |
| <b>Indonesia</b>                  |      |      |      |      |   |
| Cereals                           | 0    | 0    | 0    | 0    | 0 |
| Fiber                             | 0    | 0    | 0    | 0    | 0 |
| Fruit                             | 0    | 0    | 0    | 0    | 0 |
| Livestock                         | 0.01 | 0.01 | 0    | 0    | 0 |
| Oil crops                         | 0    | 0    | 0    | 0    | 0 |
| Pulses                            | 0    | 0    | 0    | 0    | 0 |
| Roots & tubers                    | 0    | 0    | 0    | 0    | 0 |
| Sugar crops                       | 0    | 0    | 0    | 0    | 0 |
| Vegetables                        | 0    | 0    | 0    | 0    | 0 |
| <b>Iran (Islamic Republic of)</b> |      |      |      |      |   |
| Cereals                           | 0    | 0    | 0    | 0    | 0 |
| Fiber                             | 0    | 0    | 0    | 0    | 0 |
| Fruit                             | 0    | 0    | 0    | 0    | 0 |
| Livestock                         | 0.01 | 0.03 | 0    | 0.01 | 0 |
| Oil crops                         | 0    | 0    | 0    | 0    | 0 |
| Pulses                            | 0    | 0    | 0    | 0    | 0 |

|                    |   |      |      |      |   |
|--------------------|---|------|------|------|---|
| Roots & tubers     | 0 | 0    | 0    | 0    | 0 |
| Sugar crops        | 0 | 0    | 0    | 0    | 0 |
| Vegetables         | 0 | 0    | 0    | 0    | 0 |
| <b>Iraq</b>        |   |      |      |      |   |
| Cereals            | 0 | 0    | 0    | 0    | 0 |
| Fiber              | 0 | 0    | 0    | 0    | 0 |
| Fruit              | 0 | 0    | 0    | 0    | 0 |
| Livestock          | 0 | 0    | 0    | 0    | 0 |
| Oil crops          | 0 | 0    | 0    | 0    | 0 |
| Pulses             | 0 | 0    | 0    | 0    | 0 |
| Roots & tubers     | 0 | 0    | 0    | 0    | 0 |
| Sugar crops        | 0 | 0    | 0    | 0    | 0 |
| Vegetables         | 0 | 0    | 0    | 0    | 0 |
| <b>Ireland</b>     |   |      |      |      |   |
| Cereals            | 0 | 0    | 0    | 0    | 0 |
| Fiber              | 0 | 0    | 0    | 0    | 0 |
| Fruit              | 0 | 0    | 0    | 0    | 0 |
| Livestock          | 0 | 0.01 | 0    | 0.01 | 0 |
| Oil crops          | 0 | 0    | 0    | 0    | 0 |
| Pulses             | 0 | 0    | 0    | 0    | 0 |
| Roots & tubers     | 0 | 0    | 0    | 0    | 0 |
| Sugar crops        | 0 | 0    | 0    | 0    | 0 |
| Vegetables         | 0 | 0    | 0    | 0    | 0 |
| <b>Israel</b>      |   |      |      |      |   |
| Cereals            | 0 | 0    | 0    | 0    | 0 |
| Fiber              | 0 | 0    | 0    | 0    | 0 |
| Fruit              | 0 | 0    | 0    | 0    | 0 |
| Livestock          | 0 | 0.01 | 0    | 0    | 0 |
| Oil crops          | 0 | 0    | 0    | 0    | 0 |
| Pulses             | 0 | 0    | 0    | 0    | 0 |
| Roots & tubers     | 0 | 0    | 0    | 0    | 0 |
| Sugar crops        | 0 | 0    | 0    | 0    | 0 |
| Vegetables         | 0 | 0    | 0    | 0    | 0 |
| <b>Italy</b>       |   |      |      |      |   |
| Cereals            | 0 | 0    | 0    | 0    | 0 |
| Fiber              | 0 | 0    | 0    | 0    | 0 |
| Fruit              | 0 | 0    | 0    | 0    | 0 |
| Livestock          | 0 | 0.02 | 0.01 | 0.03 | 0 |
| Oil crops          | 0 | 0    | 0    | 0    | 0 |
| Pulses             | 0 | 0    | 0    | 0    | 0 |
| Roots & tubers     | 0 | 0    | 0    | 0    | 0 |
| Sugar crops        | 0 | 0    | 0    | 0    | 0 |
| Vegetables         | 0 | 0    | 0    | 0    | 0 |
| <b>Ivory Coast</b> |   |      |      |      |   |
| Cereals            | 0 | 0    | 0    | 0    | 0 |
| Fiber              | 0 | 0    | 0    | 0    | 0 |

|                   |      |      |      |      |   |
|-------------------|------|------|------|------|---|
| Fruit             | 0    | 0    | 0    | 0    | 0 |
| Livestock         | 0    | 0    | 0    | 0    | 0 |
| Oil crops         | 0    | 0    | 0    | 0    | 0 |
| Pulses            | 0    | 0    | 0    | 0    | 0 |
| Roots & tubers    | 0    | 0    | 0    | 0    | 0 |
| Sugar crops       | 0    | 0    | 0    | 0    | 0 |
| Vegetables        | 0    | 0    | 0    | 0    | 0 |
| <b>Jamaica</b>    |      |      |      |      |   |
| Cereals           | 0    | 0    | 0    | 0    | 0 |
| Fiber             | 0    | 0    | 0    | 0    | 0 |
| Fruit             | 0    | 0    | 0    | 0    | 0 |
| Livestock         | 0    | 0    | 0    | 0    | 0 |
| Oil crops         | 0    | 0    | 0    | 0    | 0 |
| Pulses            | 0    | 0    | 0    | 0    | 0 |
| Roots & tubers    | 0    | 0    | 0    | 0    | 0 |
| Sugar crops       | 0    | 0    | 0    | 0    | 0 |
| Vegetables        | 0    | 0    | 0    | 0    | 0 |
| <b>Japan</b>      |      |      |      |      |   |
| Cereals           | 0    | 0    | 0    | 0    | 0 |
| Fiber             | 0    | 0    | 0    | 0    | 0 |
| Fruit             | 0    | 0    | 0    | 0    | 0 |
| Livestock         | 0.02 | 0.02 | 0.01 | 0.01 | 0 |
| Oil crops         | 0    | 0    | 0    | 0    | 0 |
| Pulses            | 0    | 0    | 0    | 0    | 0 |
| Roots & tubers    | 0    | 0    | 0    | 0    | 0 |
| Sugar crops       | 0    | 0    | 0    | 0    | 0 |
| Vegetables        | 0    | 0    | 0    | 0    | 0 |
| <b>Jordan</b>     |      |      |      |      |   |
| Cereals           | 0    | 0    | 0    | 0    | 0 |
| Fiber             | 0    | 0    | 0    | 0    | 0 |
| Fruit             | 0    | 0    | 0    | 0    | 0 |
| Livestock         | 0    | 0    | 0    | 0    | 0 |
| Oil crops         | 0    | 0    | 0    | 0    | 0 |
| Pulses            | 0    | 0    | 0    | 0    | 0 |
| Roots & tubers    | 0    | 0    | 0    | 0    | 0 |
| Sugar crops       | 0    | 0    | 0    | 0    | 0 |
| Vegetables        | 0    | 0    | 0    | 0    | 0 |
| <b>Kazakhstan</b> |      |      |      |      |   |
| Cereals           | 0    | 0    | 0    | 0    | 0 |
| Fiber             | 0    | 0    | 0    | 0    | 0 |
| Fruit             | 0    | 0    | 0    | 0    | 0 |
| Livestock         | 0    | 0.01 | 0    | 0    | 0 |
| Oil crops         | 0    | 0    | 0    | 0    | 0 |
| Pulses            | 0    | 0    | 0    | 0    | 0 |
| Roots & tubers    | 0    | 0    | 0    | 0    | 0 |
| Sugar crops       | 0    | 0    | 0    | 0    | 0 |

|                                         |      |      |   |   |   |
|-----------------------------------------|------|------|---|---|---|
| Vegetables                              | 0    | 0    | 0 | 0 | 0 |
| <b>Kenya</b>                            |      |      |   |   |   |
| Cereals                                 | 0    | 0    | 0 | 0 | 0 |
| Fiber                                   | 0    | 0    | 0 | 0 | 0 |
| Fruit                                   | 0    | 0    | 0 | 0 | 0 |
| Livestock                               | 0.01 | 0.01 | 0 | 0 | 0 |
| Oil crops                               | 0    | 0    | 0 | 0 | 0 |
| Pulses                                  | 0    | 0    | 0 | 0 | 0 |
| Roots & tubers                          | 0    | 0    | 0 | 0 | 0 |
| Sugar crops                             | 0    | 0    | 0 | 0 | 0 |
| Vegetables                              | 0    | 0    | 0 | 0 | 0 |
| <b>Kuwait</b>                           |      |      |   |   |   |
| Cereals                                 | 0    | 0    | 0 | 0 | 0 |
| Fiber                                   | 0    | 0    | 0 | 0 | 0 |
| Fruit                                   | 0    | 0    | 0 | 0 | 0 |
| Livestock                               | 0    | 0    | 0 | 0 | 0 |
| Oil crops                               | 0    | 0    | 0 | 0 | 0 |
| Pulses                                  | 0    | 0    | 0 | 0 | 0 |
| Roots & tubers                          | 0    | 0    | 0 | 0 | 0 |
| Sugar crops                             | 0    | 0    | 0 | 0 | 0 |
| Vegetables                              | 0    | 0    | 0 | 0 | 0 |
| <b>Kyrgyzstan</b>                       |      |      |   |   |   |
| Cereals                                 | 0    | 0    | 0 | 0 | 0 |
| Fiber                                   | 0    | 0    | 0 | 0 | 0 |
| Fruit                                   | 0    | 0    | 0 | 0 | 0 |
| Livestock                               | 0    | 0    | 0 | 0 | 0 |
| Oil crops                               | 0    | 0    | 0 | 0 | 0 |
| Pulses                                  | 0    | 0    | 0 | 0 | 0 |
| Roots & tubers                          | 0    | 0    | 0 | 0 | 0 |
| Sugar crops                             | 0    | 0    | 0 | 0 | 0 |
| Vegetables                              | 0    | 0    | 0 | 0 | 0 |
| <b>Lao People's Democratic Republic</b> |      |      |   |   |   |
| Cereals                                 | 0    | 0    | 0 | 0 | 0 |
| Fiber                                   | 0    | 0    | 0 | 0 | 0 |
| Fruit                                   | 0    | 0    | 0 | 0 | 0 |
| Livestock                               | 0    | 0    | 0 | 0 | 0 |
| Oil crops                               | 0    | 0    | 0 | 0 | 0 |
| Pulses                                  | 0    | 0    | 0 | 0 | 0 |
| Roots & tubers                          | 0    | 0    | 0 | 0 | 0 |
| Sugar crops                             | 0    | 0    | 0 | 0 | 0 |
| Vegetables                              | 0    | 0    | 0 | 0 | 0 |
| <b>Latvia</b>                           |      |      |   |   |   |
| Cereals                                 | 0    | 0    | 0 | 0 | 0 |
| Fiber                                   | 0    | 0    | 0 | 0 | 0 |
| Fruit                                   | 0    | 0    | 0 | 0 | 0 |



|                |   |   |   |   |   |
|----------------|---|---|---|---|---|
| Livestock      | 0 | 0 | 0 | 0 | 0 |
| Oil crops      | 0 | 0 | 0 | 0 | 0 |
| Pulses         | 0 | 0 | 0 | 0 | 0 |
| Roots & tubers | 0 | 0 | 0 | 0 | 0 |
| Sugar crops    | 0 | 0 | 0 | 0 | 0 |
| Vegetables     | 0 | 0 | 0 | 0 | 0 |
| <b>Lebanon</b> |   |   |   |   |   |
| Cereals        | 0 | 0 | 0 | 0 | 0 |
| Fiber          | 0 | 0 | 0 | 0 | 0 |
| Fruit          | 0 | 0 | 0 | 0 | 0 |
| Livestock      | 0 | 0 | 0 | 0 | 0 |
| Oil crops      | 0 | 0 | 0 | 0 | 0 |
| Pulses         | 0 | 0 | 0 | 0 | 0 |
| Roots & tubers | 0 | 0 | 0 | 0 | 0 |
| Sugar crops    | 0 | 0 | 0 | 0 | 0 |
| Vegetables     | 0 | 0 | 0 | 0 | 0 |
| <b>Lesotho</b> |   |   |   |   |   |
| Cereals        | 0 | 0 | 0 | 0 | 0 |
| Fiber          | 0 | 0 | 0 | 0 | 0 |
| Fruit          | 0 | 0 | 0 | 0 | 0 |
| Livestock      | 0 | 0 | 0 | 0 | 0 |
| Oil crops      | 0 | 0 | 0 | 0 | 0 |
| Pulses         | 0 | 0 | 0 | 0 | 0 |
| Roots & tubers | 0 | 0 | 0 | 0 | 0 |
| Sugar crops    | 0 | 0 | 0 | 0 | 0 |
| Vegetables     | 0 | 0 | 0 | 0 | 0 |
| <b>Liberia</b> |   |   |   |   |   |
| Cereals        | 0 | 0 | 0 | 0 | 0 |
| Fiber          | 0 | 0 | 0 | 0 | 0 |
| Fruit          | 0 | 0 | 0 | 0 | 0 |
| Livestock      | 0 | 0 | 0 | 0 | 0 |
| Oil crops      | 0 | 0 | 0 | 0 | 0 |
| Pulses         | 0 | 0 | 0 | 0 | 0 |
| Roots & tubers | 0 | 0 | 0 | 0 | 0 |
| Sugar crops    | 0 | 0 | 0 | 0 | 0 |
| Vegetables     | 0 | 0 | 0 | 0 | 0 |
| <b>Libya</b>   |   |   |   |   |   |
| Cereals        | 0 | 0 | 0 | 0 | 0 |
| Fiber          | 0 | 0 | 0 | 0 | 0 |
| Fruit          | 0 | 0 | 0 | 0 | 0 |
| Livestock      | 0 | 0 | 0 | 0 | 0 |
| Oil crops      | 0 | 0 | 0 | 0 | 0 |
| Pulses         | 0 | 0 | 0 | 0 | 0 |
| Roots & tubers | 0 | 0 | 0 | 0 | 0 |
| Sugar crops    | 0 | 0 | 0 | 0 | 0 |
| Vegetables     | 0 | 0 | 0 | 0 | 0 |

**Lithuania**

|                |   |   |   |   |   |
|----------------|---|---|---|---|---|
| Cereals        | 0 | 0 | 0 | 0 | 0 |
| Fiber          | 0 | 0 | 0 | 0 | 0 |
| Fruit          | 0 | 0 | 0 | 0 | 0 |
| Livestock      | 0 | 0 | 0 | 0 | 0 |
| Oil crops      | 0 | 0 | 0 | 0 | 0 |
| Pulses         | 0 | 0 | 0 | 0 | 0 |
| Roots & tubers | 0 | 0 | 0 | 0 | 0 |
| Sugar crops    | 0 | 0 | 0 | 0 | 0 |
| Vegetables     | 0 | 0 | 0 | 0 | 0 |

**Luxembourg**

|                |   |   |   |   |   |
|----------------|---|---|---|---|---|
| Cereals        | 0 | 0 | 0 | 0 | 0 |
| Fiber          | 0 | 0 | 0 | 0 | 0 |
| Fruit          | 0 | 0 | 0 | 0 | 0 |
| Livestock      | 0 | 0 | 0 | 0 | 0 |
| Oil crops      | 0 | 0 | 0 | 0 | 0 |
| Pulses         | 0 | 0 | 0 | 0 | 0 |
| Roots & tubers | 0 | 0 | 0 | 0 | 0 |
| Sugar crops    | 0 | 0 | 0 | 0 | 0 |
| Vegetables     | 0 | 0 | 0 | 0 | 0 |

**Madagascar**

|                |   |   |   |   |   |
|----------------|---|---|---|---|---|
| Cereals        | 0 | 0 | 0 | 0 | 0 |
| Fiber          | 0 | 0 | 0 | 0 | 0 |
| Fruit          | 0 | 0 | 0 | 0 | 0 |
| Livestock      | 0 | 0 | 0 | 0 | 0 |
| Oil crops      | 0 | 0 | 0 | 0 | 0 |
| Pulses         | 0 | 0 | 0 | 0 | 0 |
| Roots & tubers | 0 | 0 | 0 | 0 | 0 |
| Sugar crops    | 0 | 0 | 0 | 0 | 0 |
| Vegetables     | 0 | 0 | 0 | 0 | 0 |

**Malawi**

|                |   |   |   |   |   |
|----------------|---|---|---|---|---|
| Cereals        | 0 | 0 | 0 | 0 | 0 |
| Fiber          | 0 | 0 | 0 | 0 | 0 |
| Fruit          | 0 | 0 | 0 | 0 | 0 |
| Livestock      | 0 | 0 | 0 | 0 | 0 |
| Oil crops      | 0 | 0 | 0 | 0 | 0 |
| Pulses         | 0 | 0 | 0 | 0 | 0 |
| Roots & tubers | 0 | 0 | 0 | 0 | 0 |
| Sugar crops    | 0 | 0 | 0 | 0 | 0 |
| Vegetables     | 0 | 0 | 0 | 0 | 0 |

**Malaysia**

|           |   |   |   |   |   |
|-----------|---|---|---|---|---|
| Cereals   | 0 | 0 | 0 | 0 | 0 |
| Fiber     | 0 | 0 | 0 | 0 | 0 |
| Fruit     | 0 | 0 | 0 | 0 | 0 |
| Livestock | 0 | 0 | 0 | 0 | 0 |
| Oil crops | 0 | 0 | 0 | 0 | 0 |

|                   |      |      |      |      |      |
|-------------------|------|------|------|------|------|
| Pulses            | 0    | 0    | 0    | 0    | 0    |
| Roots & tubers    | 0    | 0    | 0    | 0    | 0    |
| Sugar crops       | 0    | 0    | 0    | 0    | 0    |
| Vegetables        | 0    | 0    | 0    | 0    | 0    |
| <b>Mali</b>       |      |      |      |      |      |
| Cereals           | 0    | 0    | 0    | 0    | 0    |
| Fiber             | 0    | 0    | 0    | 0    | 0    |
| Fruit             | 0    | 0    | 0    | 0    | 0    |
| Livestock         | 0    | 0    | 0    | 0    | 0    |
| Oil crops         | 0    | 0    | 0    | 0    | 0    |
| Pulses            | 0    | 0    | 0    | 0    | 0    |
| Roots & tubers    | 0    | 0    | 0    | 0    | 0    |
| Sugar crops       | 0    | 0    | 0    | 0    | 0    |
| Vegetables        | 0    | 0    | 0    | 0    | 0    |
| <b>Mauritania</b> |      |      |      |      |      |
| Cereals           | 0    | 0    | 0    | 0    | 0    |
| Fiber             | 0    | 0    | 0    | 0    | 0    |
| Fruit             | 0    | 0    | 0    | 0    | 0    |
| Livestock         | 0    | 0    | 0    | 0    | 0    |
| Oil crops         | 0    | 0    | 0    | 0    | 0    |
| Pulses            | 0    | 0    | 0    | 0    | 0    |
| Roots & tubers    | 0    | 0    | 0    | 0    | 0    |
| Sugar crops       | 0    | 0    | 0    | 0    | 0    |
| Vegetables        | 0    | 0    | 0    | 0    | 0    |
| <b>Mauritius</b>  |      |      |      |      |      |
| Cereals           | 0    | 0    | 0    | 0    | 0    |
| Fiber             | 0    | 0    | 0    | 0    | 0    |
| Fruit             | 0    | 0    | 0    | 0    | 0    |
| Livestock         | 0    | 0    | 0    | 0    | 0    |
| Oil crops         | 0    | 0    | 0    | 0    | 0    |
| Pulses            | 0    | 0    | 0    | 0    | 0    |
| Roots & tubers    | 0    | 0    | 0    | 0    | 0    |
| Sugar crops       | 0    | 0    | 0    | 0    | 0    |
| Vegetables        | 0    | 0    | 0    | 0    | 0    |
| <b>Mexico</b>     |      |      |      |      |      |
| Cereals           | 0    | 0    | 0    | 0    | 0    |
| Fiber             | 0    | 0    | 0    | 0    | 0    |
| Fruit             | 0    | 0    | 0    | 0    | 0    |
| Livestock         | 0.01 | 0.02 | 0.02 | 0.02 | 0.02 |
| Oil crops         | 0    | 0    | 0    | 0    | 0    |
| Pulses            | 0    | 0    | 0    | 0    | 0    |
| Roots & tubers    | 0    | 0    | 0    | 0    | 0    |
| Sugar crops       | 0    | 0    | 0    | 0    | 0    |
| Vegetables        | 0    | 0    | 0    | 0    | 0    |
| <b>Mongolia</b>   |      |      |      |      |      |
| Cereals           | 0    | 0    | 0    | 0    | 0    |

|                   |   |      |   |   |   |
|-------------------|---|------|---|---|---|
| Fiber             | 0 | 0    | 0 | 0 | 0 |
| Fruit             | 0 | 0    | 0 | 0 | 0 |
| Livestock         | 0 | 0    | 0 | 0 | 0 |
| Oil crops         | 0 | 0    | 0 | 0 | 0 |
| Pulses            | 0 | 0    | 0 | 0 | 0 |
| Roots & tubers    | 0 | 0    | 0 | 0 | 0 |
| Sugar crops       | 0 | 0    | 0 | 0 | 0 |
| Vegetables        | 0 | 0    | 0 | 0 | 0 |
| <b>Montenegro</b> |   |      |   |   |   |
| Cereals           | 0 | 0    | 0 | 0 | 0 |
| Fiber             | 0 | 0    | 0 | 0 | 0 |
| Fruit             | 0 | 0    | 0 | 0 | 0 |
| Livestock         | 0 | 0.01 | 0 | 0 | 0 |
| Oil crops         | 0 | 0    | 0 | 0 | 0 |
| Pulses            | 0 | 0    | 0 | 0 | 0 |
| Roots & tubers    | 0 | 0    | 0 | 0 | 0 |
| Sugar crops       | 0 | 0    | 0 | 0 | 0 |
| Vegetables        | 0 | 0    | 0 | 0 | 0 |
| <b>Morocco</b>    |   |      |   |   |   |
| Cereals           | 0 | 0    | 0 | 0 | 0 |
| Fiber             | 0 | 0    | 0 | 0 | 0 |
| Fruit             | 0 | 0    | 0 | 0 | 0 |
| Livestock         | 0 | 0.01 | 0 | 0 | 0 |
| Oil crops         | 0 | 0    | 0 | 0 | 0 |
| Pulses            | 0 | 0    | 0 | 0 | 0 |
| Roots & tubers    | 0 | 0    | 0 | 0 | 0 |
| Sugar crops       | 0 | 0    | 0 | 0 | 0 |
| Vegetables        | 0 | 0    | 0 | 0 | 0 |
| <b>Mozambique</b> |   |      |   |   |   |
| Cereals           | 0 | 0    | 0 | 0 | 0 |
| Fiber             | 0 | 0    | 0 | 0 | 0 |
| Fruit             | 0 | 0    | 0 | 0 | 0 |
| Livestock         | 0 | 0    | 0 | 0 | 0 |
| Oil crops         | 0 | 0    | 0 | 0 | 0 |
| Pulses            | 0 | 0    | 0 | 0 | 0 |
| Roots & tubers    | 0 | 0    | 0 | 0 | 0 |
| Sugar crops       | 0 | 0    | 0 | 0 | 0 |
| Vegetables        | 0 | 0    | 0 | 0 | 0 |
| <b>Myanmar</b>    |   |      |   |   |   |
| Cereals           | 0 | 0    | 0 | 0 | 0 |
| Fiber             | 0 | 0    | 0 | 0 | 0 |
| Fruit             | 0 | 0    | 0 | 0 | 0 |
| Livestock         | 0 | 0.01 | 0 | 0 | 0 |
| Oil crops         | 0 | 0    | 0 | 0 | 0 |
| Pulses            | 0 | 0    | 0 | 0 | 0 |
| Roots & tubers    | 0 | 0    | 0 | 0 | 0 |

|                    |   |      |      |      |      |
|--------------------|---|------|------|------|------|
| Sugar crops        | 0 | 0    | 0    | 0    | 0    |
| Vegetables         | 0 | 0    | 0    | 0    | 0    |
| <b>Namibia</b>     |   |      |      |      |      |
| Cereals            | 0 | 0    | 0    | 0    | 0    |
| Fiber              | 0 | 0    | 0    | 0    | 0    |
| Fruit              | 0 | 0    | 0    | 0    | 0    |
| Livestock          | 0 | 0    | 0    | 0    | 0    |
| Oil crops          | 0 | 0    | 0    | 0    | 0    |
| Pulses             | 0 | 0    | 0    | 0    | 0    |
| Roots & tubers     | 0 | 0    | 0    | 0    | 0    |
| Sugar crops        | 0 | 0    | 0    | 0    | 0    |
| Vegetables         | 0 | 0    | 0    | 0    | 0    |
| <b>Nepal</b>       |   |      |      |      |      |
| Cereals            | 0 | 0    | 0    | 0    | 0    |
| Fiber              | 0 | 0    | 0    | 0    | 0    |
| Fruit              | 0 | 0    | 0    | 0    | 0    |
| Livestock          | 0 | 0.01 | 0    | 0    | 0    |
| Oil crops          | 0 | 0    | 0    | 0    | 0    |
| Pulses             | 0 | 0    | 0    | 0    | 0    |
| Roots & tubers     | 0 | 0    | 0    | 0    | 0    |
| Sugar crops        | 0 | 0    | 0    | 0    | 0    |
| Vegetables         | 0 | 0    | 0    | 0    | 0    |
| <b>Netherlands</b> |   |      |      |      |      |
| Cereals            | 0 | 0    | 0    | 0    | 0    |
| Fiber              | 0 | 0    | 0    | 0    | 0    |
| Fruit              | 0 | 0    | 0    | 0    | 0    |
| Livestock          | 0 | 0.01 | 0.01 | 0.03 | 0.01 |
| Oil crops          | 0 | 0    | 0    | 0    | 0    |
| Pulses             | 0 | 0    | 0    | 0    | 0    |
| Roots & tubers     | 0 | 0    | 0    | 0    | 0    |
| Sugar crops        | 0 | 0    | 0    | 0    | 0    |
| Vegetables         | 0 | 0    | 0    | 0    | 0    |
| <b>New Zealand</b> |   |      |      |      |      |
| Cereals            | 0 | 0    | 0    | 0    | 0    |
| Fiber              | 0 | 0    | 0    | 0    | 0    |
| Fruit              | 0 | 0    | 0    | 0    | 0    |
| Livestock          | 0 | 0    | 0    | 0.01 | 0.05 |
| Oil crops          | 0 | 0    | 0    | 0    | 0    |
| Pulses             | 0 | 0    | 0    | 0    | 0    |
| Roots & tubers     | 0 | 0    | 0    | 0    | 0    |
| Sugar crops        | 0 | 0    | 0    | 0    | 0    |
| Vegetables         | 0 | 0    | 0    | 0    | 0    |
| <b>Nicaragua</b>   |   |      |      |      |      |
| Cereals            | 0 | 0    | 0    | 0    | 0    |
| Fiber              | 0 | 0    | 0    | 0    | 0    |
| Fruit              | 0 | 0    | 0    | 0    | 0    |

|                |      |      |   |   |   |
|----------------|------|------|---|---|---|
| Livestock      | 0    | 0    | 0 | 0 | 0 |
| Oil crops      | 0    | 0    | 0 | 0 | 0 |
| Pulses         | 0    | 0    | 0 | 0 | 0 |
| Roots & tubers | 0    | 0    | 0 | 0 | 0 |
| Sugar crops    | 0    | 0    | 0 | 0 | 0 |
| Vegetables     | 0    | 0    | 0 | 0 | 0 |
| <b>Niger</b>   |      |      |   |   |   |
| Cereals        | 0    | 0    | 0 | 0 | 0 |
| Fiber          | 0    | 0    | 0 | 0 | 0 |
| Fruit          | 0    | 0    | 0 | 0 | 0 |
| Livestock      | 0    | 0    | 0 | 0 | 0 |
| Oil crops      | 0    | 0    | 0 | 0 | 0 |
| Pulses         | 0    | 0    | 0 | 0 | 0 |
| Roots & tubers | 0    | 0    | 0 | 0 | 0 |
| Sugar crops    | 0    | 0    | 0 | 0 | 0 |
| Vegetables     | 0    | 0    | 0 | 0 | 0 |
| <b>Nigeria</b> |      |      |   |   |   |
| Cereals        | 0    | 0    | 0 | 0 | 0 |
| Fiber          | 0    | 0    | 0 | 0 | 0 |
| Fruit          | 0    | 0    | 0 | 0 | 0 |
| Livestock      | 0.01 | 0.01 | 0 | 0 | 0 |
| Oil crops      | 0    | 0    | 0 | 0 | 0 |
| Pulses         | 0    | 0    | 0 | 0 | 0 |
| Roots & tubers | 0    | 0    | 0 | 0 | 0 |
| Sugar crops    | 0    | 0    | 0 | 0 | 0 |
| Vegetables     | 0    | 0    | 0 | 0 | 0 |
| <b>Norway</b>  |      |      |   |   |   |
| Cereals        | 0    | 0    | 0 | 0 | 0 |
| Fiber          | 0    | 0    | 0 | 0 | 0 |
| Fruit          | 0    | 0    | 0 | 0 | 0 |
| Livestock      | 0    | 0    | 0 | 0 | 0 |
| Oil crops      | 0    | 0    | 0 | 0 | 0 |
| Pulses         | 0    | 0    | 0 | 0 | 0 |
| Roots & tubers | 0    | 0    | 0 | 0 | 0 |
| Sugar crops    | 0    | 0    | 0 | 0 | 0 |
| Vegetables     | 0    | 0    | 0 | 0 | 0 |
| <b>Oman</b>    |      |      |   |   |   |
| Cereals        | 0    | 0    | 0 | 0 | 0 |
| Fiber          | 0    | 0    | 0 | 0 | 0 |
| Fruit          | 0    | 0    | 0 | 0 | 0 |
| Livestock      | 0    | 0    | 0 | 0 | 0 |
| Oil crops      | 0    | 0    | 0 | 0 | 0 |
| Pulses         | 0    | 0    | 0 | 0 | 0 |
| Roots & tubers | 0    | 0    | 0 | 0 | 0 |
| Sugar crops    | 0    | 0    | 0 | 0 | 0 |
| Vegetables     | 0    | 0    | 0 | 0 | 0 |

**Pakistan**

|                |      |      |      |   |   |
|----------------|------|------|------|---|---|
| Cereals        | 0    | 0    | 0    | 0 | 0 |
| Fiber          | 0    | 0    | 0    | 0 | 0 |
| Fruit          | 0    | 0    | 0    | 0 | 0 |
| Livestock      | 0.05 | 0.08 | 0.01 | 0 | 0 |
| Oil crops      | 0    | 0    | 0    | 0 | 0 |
| Pulses         | 0    | 0    | 0    | 0 | 0 |
| Roots & tubers | 0    | 0    | 0    | 0 | 0 |
| Sugar crops    | 0    | 0    | 0    | 0 | 0 |
| Vegetables     | 0    | 0    | 0    | 0 | 0 |

**Panama**

|                |   |   |   |   |   |
|----------------|---|---|---|---|---|
| Cereals        | 0 | 0 | 0 | 0 | 0 |
| Fiber          | 0 | 0 | 0 | 0 | 0 |
| Fruit          | 0 | 0 | 0 | 0 | 0 |
| Livestock      | 0 | 0 | 0 | 0 | 0 |
| Oil crops      | 0 | 0 | 0 | 0 | 0 |
| Pulses         | 0 | 0 | 0 | 0 | 0 |
| Roots & tubers | 0 | 0 | 0 | 0 | 0 |
| Sugar crops    | 0 | 0 | 0 | 0 | 0 |
| Vegetables     | 0 | 0 | 0 | 0 | 0 |

**Papua New Guinea**

|                |   |   |   |   |   |
|----------------|---|---|---|---|---|
| Cereals        | 0 | 0 | 0 | 0 | 0 |
| Fiber          | 0 | 0 | 0 | 0 | 0 |
| Fruit          | 0 | 0 | 0 | 0 | 0 |
| Livestock      | 0 | 0 | 0 | 0 | 0 |
| Oil crops      | 0 | 0 | 0 | 0 | 0 |
| Pulses         | 0 | 0 | 0 | 0 | 0 |
| Roots & tubers | 0 | 0 | 0 | 0 | 0 |
| Sugar crops    | 0 | 0 | 0 | 0 | 0 |
| Vegetables     | 0 | 0 | 0 | 0 | 0 |

**Paraguay**

|                |   |   |   |   |   |
|----------------|---|---|---|---|---|
| Cereals        | 0 | 0 | 0 | 0 | 0 |
| Fiber          | 0 | 0 | 0 | 0 | 0 |
| Fruit          | 0 | 0 | 0 | 0 | 0 |
| Livestock      | 0 | 0 | 0 | 0 | 0 |
| Oil crops      | 0 | 0 | 0 | 0 | 0 |
| Pulses         | 0 | 0 | 0 | 0 | 0 |
| Roots & tubers | 0 | 0 | 0 | 0 | 0 |
| Sugar crops    | 0 | 0 | 0 | 0 | 0 |
| Vegetables     | 0 | 0 | 0 | 0 | 0 |

**Peru**

|           |   |   |   |   |   |
|-----------|---|---|---|---|---|
| Cereals   | 0 | 0 | 0 | 0 | 0 |
| Fiber     | 0 | 0 | 0 | 0 | 0 |
| Fruit     | 0 | 0 | 0 | 0 | 0 |
| Livestock | 0 | 0 | 0 | 0 | 0 |
| Oil crops | 0 | 0 | 0 | 0 | 0 |

|                          |      |      |      |      |      |
|--------------------------|------|------|------|------|------|
| Pulses                   | 0    | 0    | 0    | 0    | 0    |
| Roots & tubers           | 0    | 0    | 0    | 0    | 0    |
| Sugar crops              | 0    | 0    | 0    | 0    | 0    |
| Vegetables               | 0    | 0    | 0    | 0    | 0    |
| <b>Philippines</b>       |      |      |      |      |      |
| Cereals                  | 0    | 0    | 0    | 0    | 0    |
| Fiber                    | 0    | 0    | 0    | 0    | 0    |
| Fruit                    | 0    | 0    | 0    | 0    | 0    |
| Livestock                | 0    | 0.01 | 0    | 0    | 0    |
| Oil crops                | 0    | 0    | 0    | 0    | 0    |
| Pulses                   | 0    | 0    | 0    | 0    | 0    |
| Roots & tubers           | 0    | 0    | 0    | 0    | 0    |
| Sugar crops              | 0    | 0    | 0    | 0    | 0    |
| Vegetables               | 0    | 0    | 0    | 0    | 0    |
| <b>Poland</b>            |      |      |      |      |      |
| Cereals                  | 0    | 0    | 0    | 0    | 0    |
| Fiber                    | 0    | 0    | 0    | 0    | 0    |
| Fruit                    | 0    | 0    | 0    | 0    | 0    |
| Livestock                | 0.01 | 0.02 | 0.01 | 0.02 | 0.01 |
| Oil crops                | 0    | 0    | 0    | 0    | 0    |
| Pulses                   | 0    | 0    | 0    | 0    | 0    |
| Roots & tubers           | 0    | 0    | 0    | 0    | 0    |
| Sugar crops              | 0    | 0    | 0    | 0    | 0    |
| Vegetables               | 0    | 0    | 0    | 0    | 0    |
| <b>Portugal</b>          |      |      |      |      |      |
| Cereals                  | 0    | 0    | 0    | 0    | 0    |
| Fiber                    | 0    | 0    | 0    | 0    | 0    |
| Fruit                    | 0    | 0    | 0    | 0    | 0    |
| Livestock                | 0    | 0    | 0    | 0    | 0    |
| Oil crops                | 0    | 0    | 0    | 0    | 0    |
| Pulses                   | 0    | 0    | 0    | 0    | 0    |
| Roots & tubers           | 0    | 0    | 0    | 0    | 0    |
| Sugar crops              | 0    | 0    | 0    | 0    | 0    |
| Vegetables               | 0    | 0    | 0    | 0    | 0    |
| <b>Qatar</b>             |      |      |      |      |      |
| Cereals                  | 0    | 0    | 0    | 0    | 0    |
| Fiber                    | 0    | 0    | 0    | 0    | 0    |
| Fruit                    | 0    | 0    | 0    | 0    | 0    |
| Livestock                | 0    | 0    | 0    | 0    | 0    |
| Oil crops                | 0    | 0    | 0    | 0    | 0    |
| Pulses                   | 0    | 0    | 0    | 0    | 0    |
| Roots & tubers           | 0    | 0    | 0    | 0    | 0    |
| Sugar crops              | 0    | 0    | 0    | 0    | 0    |
| Vegetables               | 0    | 0    | 0    | 0    | 0    |
| <b>Republic of Korea</b> |      |      |      |      |      |
| Cereals                  | 0    | 0    | 0    | 0    | 0    |



|                           |      |      |      |      |      |
|---------------------------|------|------|------|------|------|
| Fiber                     | 0    | 0    | 0    | 0    | 0    |
| Fruit                     | 0    | 0    | 0    | 0    | 0    |
| Livestock                 | 0.01 | 0.01 | 0    | 0    | 0    |
| Oil crops                 | 0    | 0    | 0    | 0    | 0    |
| Pulses                    | 0    | 0    | 0    | 0    | 0    |
| Roots & tubers            | 0    | 0    | 0    | 0    | 0    |
| Sugar crops               | 0    | 0    | 0    | 0    | 0    |
| Vegetables                | 0    | 0    | 0    | 0    | 0    |
| <b>Romania</b>            |      |      |      |      |      |
| Cereals                   | 0    | 0    | 0    | 0    | 0    |
| Fiber                     | 0    | 0    | 0    | 0    | 0    |
| Fruit                     | 0    | 0    | 0    | 0    | 0    |
| Livestock                 | 0    | 0.01 | 0    | 0.01 | 0    |
| Oil crops                 | 0    | 0    | 0    | 0    | 0    |
| Pulses                    | 0    | 0    | 0    | 0    | 0    |
| Roots & tubers            | 0    | 0    | 0    | 0    | 0    |
| Sugar crops               | 0    | 0    | 0    | 0    | 0    |
| Vegetables                | 0    | 0    | 0    | 0    | 0    |
| <b>Russian Federation</b> |      |      |      |      |      |
| Cereals                   | 0    | 0    | 0    | 0    | 0    |
| Fiber                     | 0    | 0    | 0    | 0    | 0    |
| Fruit                     | 0    | 0    | 0    | 0    | 0    |
| Livestock                 | 0.01 | 0.03 | 0.02 | 0.08 | 0.03 |
| Oil crops                 | 0    | 0    | 0    | 0    | 0    |
| Pulses                    | 0    | 0    | 0    | 0    | 0    |
| Roots & tubers            | 0    | 0    | 0    | 0    | 0    |
| Sugar crops               | 0    | 0    | 0    | 0    | 0    |
| Vegetables                | 0    | 0    | 0    | 0    | 0    |
| <b>Rwanda</b>             |      |      |      |      |      |
| Cereals                   | 0    | 0    | 0    | 0    | 0    |
| Fiber                     | 0    | 0    | 0    | 0    | 0    |
| Fruit                     | 0    | 0    | 0    | 0    | 0    |
| Livestock                 | 0    | 0    | 0    | 0    | 0    |
| Oil crops                 | 0    | 0    | 0    | 0    | 0    |
| Pulses                    | 0    | 0    | 0    | 0    | 0    |
| Roots & tubers            | 0    | 0    | 0    | 0    | 0    |
| Sugar crops               | 0    | 0    | 0    | 0    | 0    |
| Vegetables                | 0    | 0    | 0    | 0    | 0    |
| <b>Saint Lucia</b>        |      |      |      |      |      |
| Cereals                   | 0    | 0    | 0    | 0    | 0    |
| Fiber                     | 0    | 0    | 0    | 0    | 0    |
| Fruit                     | 0    | 0    | 0    | 0    | 0    |
| Livestock                 | 0    | 0    | 0    | 0    | 0    |
| Oil crops                 | 0    | 0    | 0    | 0    | 0    |
| Pulses                    | 0    | 0    | 0    | 0    | 0    |
| Roots & tubers            | 0    | 0    | 0    | 0    | 0    |

|                                         |   |      |   |   |   |
|-----------------------------------------|---|------|---|---|---|
| Sugar crops                             | 0 | 0    | 0 | 0 | 0 |
| Vegetables                              | 0 | 0    | 0 | 0 | 0 |
| <b>Saint Vincent and the Grenadines</b> |   |      |   |   |   |
| Cereals                                 | 0 | 0    | 0 | 0 | 0 |
| Fiber                                   | 0 | 0    | 0 | 0 | 0 |
| Fruit                                   | 0 | 0    | 0 | 0 | 0 |
| Livestock                               | 0 | 0    | 0 | 0 | 0 |
| Oil crops                               | 0 | 0    | 0 | 0 | 0 |
| Pulses                                  | 0 | 0    | 0 | 0 | 0 |
| Roots & tubers                          | 0 | 0    | 0 | 0 | 0 |
| Sugar crops                             | 0 | 0    | 0 | 0 | 0 |
| Vegetables                              | 0 | 0    | 0 | 0 | 0 |
| <b>Saudi Arabia</b>                     |   |      |   |   |   |
| Cereals                                 | 0 | 0    | 0 | 0 | 0 |
| Fiber                                   | 0 | 0    | 0 | 0 | 0 |
| Fruit                                   | 0 | 0    | 0 | 0 | 0 |
| Livestock                               | 0 | 0.01 | 0 | 0 | 0 |
| Oil crops                               | 0 | 0    | 0 | 0 | 0 |
| Pulses                                  | 0 | 0    | 0 | 0 | 0 |
| Roots & tubers                          | 0 | 0    | 0 | 0 | 0 |
| Sugar crops                             | 0 | 0    | 0 | 0 | 0 |
| Vegetables                              | 0 | 0    | 0 | 0 | 0 |
| <b>Senegal</b>                          |   |      |   |   |   |
| Cereals                                 | 0 | 0    | 0 | 0 | 0 |
| Fiber                                   | 0 | 0    | 0 | 0 | 0 |
| Fruit                                   | 0 | 0    | 0 | 0 | 0 |
| Livestock                               | 0 | 0    | 0 | 0 | 0 |
| Oil crops                               | 0 | 0    | 0 | 0 | 0 |
| Pulses                                  | 0 | 0    | 0 | 0 | 0 |
| Roots & tubers                          | 0 | 0    | 0 | 0 | 0 |
| Sugar crops                             | 0 | 0    | 0 | 0 | 0 |
| Vegetables                              | 0 | 0    | 0 | 0 | 0 |
| <b>Serbia</b>                           |   |      |   |   |   |
| Cereals                                 | 0 | 0    | 0 | 0 | 0 |
| Fiber                                   | 0 | 0    | 0 | 0 | 0 |
| Fruit                                   | 0 | 0    | 0 | 0 | 0 |
| Oil crops                               | 0 | 0    | 0 | 0 | 0 |
| Pulses                                  | 0 | 0    | 0 | 0 | 0 |
| Roots & tubers                          | 0 | 0    | 0 | 0 | 0 |
| Sugar crops                             | 0 | 0    | 0 | 0 | 0 |
| Vegetables                              | 0 | 0    | 0 | 0 | 0 |
| <b>Sierra Leone</b>                     |   |      |   |   |   |
| Cereals                                 | 0 | 0    | 0 | 0 | 0 |
| Fiber                                   | 0 | 0    | 0 | 0 | 0 |
| Fruit                                   | 0 | 0    | 0 | 0 | 0 |

|                     |      |      |   |      |   |
|---------------------|------|------|---|------|---|
| Livestock           | 0    | 0    | 0 | 0    | 0 |
| Oil crops           | 0    | 0    | 0 | 0    | 0 |
| Pulses              | 0    | 0    | 0 | 0    | 0 |
| Roots & tubers      | 0    | 0    | 0 | 0    | 0 |
| Sugar crops         | 0    | 0    | 0 | 0    | 0 |
| Vegetables          | 0    | 0    | 0 | 0    | 0 |
| <b>Slovakia</b>     |      |      |   |      |   |
| Cereals             | 0    | 0    | 0 | 0    | 0 |
| Fiber               | 0    | 0    | 0 | 0    | 0 |
| Fruit               | 0    | 0    | 0 | 0    | 0 |
| Livestock           | 0    | 0    | 0 | 0    | 0 |
| Oil crops           | 0    | 0    | 0 | 0    | 0 |
| Pulses              | 0    | 0    | 0 | 0    | 0 |
| Roots & tubers      | 0    | 0    | 0 | 0    | 0 |
| Sugar crops         | 0    | 0    | 0 | 0    | 0 |
| Vegetables          | 0    | 0    | 0 | 0    | 0 |
| <b>Slovenia</b>     |      |      |   |      |   |
| Cereals             | 0    | 0    | 0 | 0    | 0 |
| Fiber               | 0    | 0    | 0 | 0    | 0 |
| Fruit               | 0    | 0    | 0 | 0    | 0 |
| Livestock           | 0    | 0    | 0 | 0    | 0 |
| Oil crops           | 0    | 0    | 0 | 0    | 0 |
| Pulses              | 0    | 0    | 0 | 0    | 0 |
| Roots & tubers      | 0    | 0    | 0 | 0    | 0 |
| Sugar crops         | 0    | 0    | 0 | 0    | 0 |
| Vegetables          | 0    | 0    | 0 | 0    | 0 |
| <b>Somalia</b>      |      |      |   |      |   |
| Cereals             | 0    | 0    | 0 | 0    | 0 |
| Fiber               | 0    | 0    | 0 | 0    | 0 |
| Fruit               | 0    | 0    | 0 | 0    | 0 |
| Livestock           | 0    | 0    | 0 | 0    | 0 |
| Oil crops           | 0    | 0    | 0 | 0    | 0 |
| Pulses              | 0    | 0    | 0 | 0    | 0 |
| Roots & tubers      | 0    | 0    | 0 | 0    | 0 |
| Sugar crops         | 0    | 0    | 0 | 0    | 0 |
| Vegetables          | 0    | 0    | 0 | 0    | 0 |
| <b>South Africa</b> |      |      |   |      |   |
| Cereals             | 0    | 0    | 0 | 0    | 0 |
| Fiber               | 0    | 0    | 0 | 0    | 0 |
| Fruit               | 0    | 0    | 0 | 0    | 0 |
| Livestock           | 0.01 | 0.01 | 0 | 0.01 | 0 |
| Oil crops           | 0    | 0    | 0 | 0    | 0 |
| Pulses              | 0    | 0    | 0 | 0    | 0 |
| Roots & tubers      | 0    | 0    | 0 | 0    | 0 |
| Sugar crops         | 0    | 0    | 0 | 0    | 0 |
| Vegetables          | 0    | 0    | 0 | 0    | 0 |

|                       |      |      |      |      |      |
|-----------------------|------|------|------|------|------|
| <b>Spain</b>          |      |      |      |      |      |
| Cereals               | 0    | 0    | 0    | 0    | 0    |
| Fiber                 | 0    | 0    | 0    | 0    | 0    |
| Fruit                 | 0    | 0    | 0    | 0    | 0    |
| Livestock             | 0.01 | 0.02 | 0.01 | 0.02 | 0.01 |
| Oil crops             | 0    | 0    | 0    | 0    | 0    |
| Pulses                | 0    | 0    | 0    | 0    | 0    |
| Roots & tubers        | 0    | 0    | 0    | 0    | 0    |
| Sugar crops           | 0    | 0    | 0    | 0    | 0    |
| Vegetables            | 0    | 0    | 0    | 0    | 0    |
| <b>Sri Lanka</b>      |      |      |      |      |      |
| Cereals               | 0    | 0    | 0    | 0    | 0    |
| Fiber                 | 0    | 0    | 0    | 0    | 0    |
| Fruit                 | 0    | 0    | 0    | 0    | 0    |
| Livestock             | 0    | 0    | 0    | 0    | 0    |
| Oil crops             | 0    | 0    | 0    | 0    | 0    |
| Pulses                | 0    | 0    | 0    | 0    | 0    |
| Roots & tubers        | 0    | 0    | 0    | 0    | 0    |
| Sugar crops           | 0    | 0    | 0    | 0    | 0    |
| Vegetables            | 0    | 0    | 0    | 0    | 0    |
| <b>Sudan (former)</b> |      |      |      |      |      |
| Cereals               | 0    | 0    | 0    | 0    | 0    |
| Fiber                 | 0    | 0    | 0    | 0    | 0    |
| Fruit                 | 0    | 0    | 0    | 0    | 0    |
| Livestock             | 0.01 | 0.02 | 0.01 | 0    | 0.01 |
| Oil crops             | 0    | 0    | 0    | 0    | 0    |
| Pulses                | 0    | 0    | 0    | 0    | 0    |
| Roots & tubers        | 0    | 0    | 0    | 0    | 0    |
| Sugar crops           | 0    | 0    | 0    | 0    | 0    |
| Vegetables            | 0    | 0    | 0    | 0    | 0    |
| <b>Suriname</b>       |      |      |      |      |      |
| Cereals               | 0    | 0    | 0    | 0    | 0    |
| Fiber                 | 0    | 0    | 0    | 0    | 0    |
| Fruit                 | 0    | 0    | 0    | 0    | 0    |
| Livestock             | 0    | 0    | 0    | 0    | 0    |
| Oil crops             | 0    | 0    | 0    | 0    | 0    |
| Pulses                | 0    | 0    | 0    | 0    | 0    |
| Roots & tubers        | 0    | 0    | 0    | 0    | 0    |
| Sugar crops           | 0    | 0    | 0    | 0    | 0    |
| Vegetables            | 0    | 0    | 0    | 0    | 0    |
| <b>Swaziland</b>      |      |      |      |      |      |
| Cereals               | 0    | 0    | 0    | 0    | 0    |
| Fiber                 | 0    | 0    | 0    | 0    | 0    |
| Fruit                 | 0    | 0    | 0    | 0    | 0    |
| Livestock             | 0    | 0    | 0    | 0    | 0    |
| Oil crops             | 0    | 0    | 0    | 0    | 0    |

|                             |   |      |   |      |   |
|-----------------------------|---|------|---|------|---|
| Pulses                      | 0 | 0    | 0 | 0    | 0 |
| Roots & tubers              | 0 | 0    | 0 | 0    | 0 |
| Sugar crops                 | 0 | 0    | 0 | 0    | 0 |
| Vegetables                  | 0 | 0    | 0 | 0    | 0 |
| <b>Sweden</b>               |   |      |   |      |   |
| Cereals                     | 0 | 0    | 0 | 0    | 0 |
| Fiber                       | 0 | 0    | 0 | 0    | 0 |
| Fruit                       | 0 | 0    | 0 | 0    | 0 |
| Livestock                   | 0 | 0    | 0 | 0.01 | 0 |
| Oil crops                   | 0 | 0    | 0 | 0    | 0 |
| Pulses                      | 0 | 0    | 0 | 0    | 0 |
| Roots & tubers              | 0 | 0    | 0 | 0    | 0 |
| Sugar crops                 | 0 | 0    | 0 | 0    | 0 |
| Vegetables                  | 0 | 0    | 0 | 0    | 0 |
| <b>Switzerland</b>          |   |      |   |      |   |
| Cereals                     | 0 | 0    | 0 | 0    | 0 |
| Fiber                       | 0 | 0    | 0 | 0    | 0 |
| Fruit                       | 0 | 0    | 0 | 0    | 0 |
| Livestock                   | 0 | 0    | 0 | 0.01 | 0 |
| Oil crops                   | 0 | 0    | 0 | 0    | 0 |
| Pulses                      | 0 | 0    | 0 | 0    | 0 |
| Roots & tubers              | 0 | 0    | 0 | 0    | 0 |
| Sugar crops                 | 0 | 0    | 0 | 0    | 0 |
| Vegetables                  | 0 | 0    | 0 | 0    | 0 |
| <b>Syrian Arab Republic</b> |   |      |   |      |   |
| Cereals                     | 0 | 0    | 0 | 0    | 0 |
| Fiber                       | 0 | 0    | 0 | 0    | 0 |
| Fruit                       | 0 | 0    | 0 | 0    | 0 |
| Livestock                   | 0 | 0.01 | 0 | 0    | 0 |
| Oil crops                   | 0 | 0    | 0 | 0    | 0 |
| Pulses                      | 0 | 0    | 0 | 0    | 0 |
| Roots & tubers              | 0 | 0    | 0 | 0    | 0 |
| Sugar crops                 | 0 | 0    | 0 | 0    | 0 |
| Vegetables                  | 0 | 0    | 0 | 0    | 0 |
| <b>Tajikistan</b>           |   |      |   |      |   |
| Cereals                     | 0 | 0    | 0 | 0    | 0 |
| Fiber                       | 0 | 0    | 0 | 0    | 0 |
| Fruit                       | 0 | 0    | 0 | 0    | 0 |
| Livestock                   | 0 | 0    | 0 | 0    | 0 |
| Oil crops                   | 0 | 0    | 0 | 0    | 0 |
| Pulses                      | 0 | 0    | 0 | 0    | 0 |
| Roots & tubers              | 0 | 0    | 0 | 0    | 0 |
| Sugar crops                 | 0 | 0    | 0 | 0    | 0 |
| Vegetables                  | 0 | 0    | 0 | 0    | 0 |
| <b>Thailand</b>             |   |      |   |      |   |
| Cereals                     | 0 | 0    | 0 | 0    | 0 |

|                                                  |   |      |   |   |   |
|--------------------------------------------------|---|------|---|---|---|
| Fiber                                            | 0 | 0    | 0 | 0 | 0 |
| Fruit                                            | 0 | 0    | 0 | 0 | 0 |
| Livestock                                        | 0 | 0.01 | 0 | 0 | 0 |
| Oil crops                                        | 0 | 0    | 0 | 0 | 0 |
| Pulses                                           | 0 | 0    | 0 | 0 | 0 |
| Roots & tubers                                   | 0 | 0    | 0 | 0 | 0 |
| Sugar crops                                      | 0 | 0    | 0 | 0 | 0 |
| Vegetables                                       | 0 | 0    | 0 | 0 | 0 |
| <b>The former Yugoslav Republic of Macedonia</b> |   |      |   |   |   |
| Cereals                                          | 0 | 0    | 0 | 0 | 0 |
| Fiber                                            | 0 | 0    | 0 | 0 | 0 |
| Fruit                                            | 0 | 0    | 0 | 0 | 0 |
| Livestock                                        | 0 | 0    | 0 | 0 | 0 |
| Oil crops                                        | 0 | 0    | 0 | 0 | 0 |
| Pulses                                           | 0 | 0    | 0 | 0 | 0 |
| Roots & tubers                                   | 0 | 0    | 0 | 0 | 0 |
| Sugar crops                                      | 0 | 0    | 0 | 0 | 0 |
| Vegetables                                       | 0 | 0    | 0 | 0 | 0 |
| <b>Togo</b>                                      |   |      |   |   |   |
| Cereals                                          | 0 | 0    | 0 | 0 | 0 |
| Fiber                                            | 0 | 0    | 0 | 0 | 0 |
| Fruit                                            | 0 | 0    | 0 | 0 | 0 |
| Livestock                                        | 0 | 0    | 0 | 0 | 0 |
| Oil crops                                        | 0 | 0    | 0 | 0 | 0 |
| Pulses                                           | 0 | 0    | 0 | 0 | 0 |
| Roots & tubers                                   | 0 | 0    | 0 | 0 | 0 |
| Sugar crops                                      | 0 | 0    | 0 | 0 | 0 |
| Vegetables                                       | 0 | 0    | 0 | 0 | 0 |
| <b>Trinidad and Tobago</b>                       |   |      |   |   |   |
| Cereals                                          | 0 | 0    | 0 | 0 | 0 |
| Fiber                                            | 0 | 0    | 0 | 0 | 0 |
| Fruit                                            | 0 | 0    | 0 | 0 | 0 |
| Livestock                                        | 0 | 0    | 0 | 0 | 0 |
| Oil crops                                        | 0 | 0    | 0 | 0 | 0 |
| Pulses                                           | 0 | 0    | 0 | 0 | 0 |
| Roots & tubers                                   | 0 | 0    | 0 | 0 | 0 |
| Sugar crops                                      | 0 | 0    | 0 | 0 | 0 |
| Vegetables                                       | 0 | 0    | 0 | 0 | 0 |
| <b>Tunisia</b>                                   |   |      |   |   |   |
| Cereals                                          | 0 | 0    | 0 | 0 | 0 |
| Fiber                                            | 0 | 0    | 0 | 0 | 0 |
| Fruit                                            | 0 | 0    | 0 | 0 | 0 |
| Livestock                                        | 0 | 0    | 0 | 0 | 0 |
| Oil crops                                        | 0 | 0    | 0 | 0 | 0 |
| Pulses                                           | 0 | 0    | 0 | 0 | 0 |

|                             |      |      |      |      |      |
|-----------------------------|------|------|------|------|------|
| Roots & tubers              | 0    | 0    | 0    | 0    | 0    |
| Sugar crops                 | 0    | 0    | 0    | 0    | 0    |
| Vegetables                  | 0    | 0    | 0    | 0    | 0    |
| <b>Turkey</b>               |      |      |      |      |      |
| Cereals                     | 0    | 0    | 0    | 0    | 0    |
| Fiber                       | 0    | 0    | 0    | 0    | 0    |
| Fruit                       | 0    | 0    | 0    | 0    | 0    |
| Livestock                   | 0.01 | 0.03 | 0.01 | 0.01 | 0    |
| Oil crops                   | 0    | 0    | 0    | 0    | 0    |
| Pulses                      | 0    | 0    | 0    | 0    | 0    |
| Roots & tubers              | 0    | 0    | 0    | 0    | 0    |
| Sugar crops                 | 0    | 0    | 0    | 0    | 0    |
| Vegetables                  | 0    | 0    | 0    | 0    | 0    |
| <b>Turkmenistan</b>         |      |      |      |      |      |
| Cereals                     | 0    | 0    | 0    | 0    | 0    |
| Fiber                       | 0    | 0    | 0    | 0    | 0    |
| Fruit                       | 0    | 0    | 0    | 0    | 0    |
| Livestock                   | 0    | 0    | 0    | 0    | 0    |
| Oil crops                   | 0    | 0    | 0    | 0    | 0    |
| Pulses                      | 0    | 0    | 0    | 0    | 0    |
| Roots & tubers              | 0    | 0    | 0    | 0    | 0    |
| Sugar crops                 | 0    | 0    | 0    | 0    | 0    |
| Vegetables                  | 0    | 0    | 0    | 0    | 0    |
| <b>Uganda</b>               |      |      |      |      |      |
| Cereals                     | 0    | 0    | 0    | 0    | 0    |
| Fiber                       | 0    | 0    | 0    | 0    | 0    |
| Fruit                       | 0    | 0    | 0    | 0    | 0    |
| Livestock                   | 0    | 0    | 0    | 0    | 0    |
| Oil crops                   | 0    | 0    | 0    | 0    | 0    |
| Pulses                      | 0    | 0    | 0    | 0    | 0    |
| Roots & tubers              | 0    | 0    | 0    | 0    | 0    |
| Sugar crops                 | 0    | 0    | 0    | 0    | 0    |
| Vegetables                  | 0    | 0    | 0    | 0    | 0    |
| <b>Ukraine</b>              |      |      |      |      |      |
| Cereals                     | 0    | 0    | 0    | 0    | 0    |
| Fiber                       | 0    | 0    | 0    | 0    | 0    |
| Fruit                       | 0    | 0    | 0    | 0    | 0    |
| Livestock                   | 0.01 | 0.02 | 0.01 | 0.02 | 0.01 |
| Oil crops                   | 0    | 0    | 0    | 0    | 0    |
| Pulses                      | 0    | 0    | 0    | 0    | 0    |
| Roots & tubers              | 0    | 0    | 0    | 0    | 0    |
| Sugar crops                 | 0    | 0    | 0    | 0    | 0    |
| Vegetables                  | 0    | 0    | 0    | 0    | 0    |
| <b>United Arab Emirates</b> |      |      |      |      |      |
| Cereals                     | 0    | 0    | 0    | 0    | 0    |
| Fiber                       | 0    | 0    | 0    | 0    | 0    |

|                                    |   |      |      |      |      |
|------------------------------------|---|------|------|------|------|
| Fruit                              | 0 | 0    | 0    | 0    | 0    |
| Livestock                          | 0 | 0    | 0    | 0    | 0    |
| Oil crops                          | 0 | 0    | 0    | 0    | 0    |
| Pulses                             | 0 | 0    | 0    | 0    | 0    |
| Roots & tubers                     | 0 | 0    | 0    | 0    | 0    |
| Sugar crops                        | 0 | 0    | 0    | 0    | 0    |
| Vegetables                         | 0 | 0    | 0    | 0    | 0    |
| <b>United Kingdom</b>              |   |      |      |      |      |
| Cereals                            | 0 | 0    | 0    | 0    | 0    |
| Fiber                              | 0 | 0    | 0    | 0    | 0    |
| Fruit                              | 0 | 0    | 0    | 0    | 0    |
| Livestock                          | 0 | 0.02 | 0.01 | 0.03 | 0.01 |
| Oil crops                          | 0 | 0    | 0    | 0    | 0    |
| Pulses                             | 0 | 0    | 0    | 0    | 0    |
| Roots & tubers                     | 0 | 0    | 0    | 0    | 0    |
| Sugar crops                        | 0 | 0    | 0    | 0    | 0    |
| Vegetables                         | 0 | 0    | 0    | 0    | 0    |
| <b>United Republic of Tanzania</b> |   |      |      |      |      |
| Cereals                            | 0 | 0    | 0    | 0    | 0    |
| Fiber                              | 0 | 0    | 0    | 0    | 0    |
| Fruit                              | 0 | 0    | 0    | 0    | 0    |
| Livestock                          | 0 | 0.01 | 0    | 0    | 0    |
| Oil crops                          | 0 | 0    | 0    | 0    | 0    |
| Pulses                             | 0 | 0    | 0    | 0    | 0    |
| Roots & tubers                     | 0 | 0    | 0    | 0    | 0    |
| Sugar crops                        | 0 | 0    | 0    | 0    | 0    |
| Vegetables                         | 0 | 0    | 0    | 0    | 0    |
| <b>United States of America</b>    |   |      |      |      |      |
| Cereals                            | 0 | 0    | 0    | 0    | 0    |
| Fiber                              | 0 | 0    | 0    | 0    | 0    |
| Fruit                              | 0 | 0    | 0    | 0    | 0    |
| Livestock                          | 0 | 0.05 | 0.08 | 0.26 | 0.2  |
| Oil crops                          | 0 | 0    | 0    | 0    | 0    |
| Pulses                             | 0 | 0    | 0    | 0    | 0    |
| Roots & tubers                     | 0 | 0    | 0    | 0    | 0    |
| Sugar crops                        | 0 | 0    | 0    | 0    | 0    |
| Vegetables                         | 0 | 0    | 0    | 0    | 0    |
| <b>Uruguay</b>                     |   |      |      |      |      |
| Cereals                            | 0 | 0    | 0    | 0    | 0    |
| Fiber                              | 0 | 0    | 0    | 0    | 0    |
| Fruit                              | 0 | 0    | 0    | 0    | 0    |
| Livestock                          | 0 | 0    | 0    | 0    | 0.01 |
| Oil crops                          | 0 | 0    | 0    | 0    | 0    |
| Pulses                             | 0 | 0    | 0    | 0    | 0    |
| Roots & tubers                     | 0 | 0    | 0    | 0    | 0    |
| Sugar crops                        | 0 | 0    | 0    | 0    | 0    |



|                                           |      |      |      |   |      |
|-------------------------------------------|------|------|------|---|------|
| Vegetables                                | 0    | 0    | 0    | 0 | 0    |
| <b>Uzbekistan</b>                         |      |      |      |   |      |
| Cereals                                   | 0    | 0    | 0    | 0 | 0    |
| Fiber                                     | 0    | 0    | 0    | 0 | 0    |
| Fruit                                     | 0    | 0    | 0    | 0 | 0    |
| Livestock                                 | 0    | 0.01 | 0.01 | 0 | 0    |
| Oil crops                                 | 0    | 0    | 0    | 0 | 0    |
| Pulses                                    | 0    | 0    | 0    | 0 | 0    |
| Roots & tubers                            | 0    | 0    | 0    | 0 | 0    |
| Sugar crops                               | 0    | 0    | 0    | 0 | 0    |
| Vegetables                                | 0    | 0    | 0    | 0 | 0    |
| <b>Venezuela (Bolivarian Republic of)</b> |      |      |      |   |      |
| Cereals                                   | 0    | 0    | 0    | 0 | 0    |
| Fiber                                     | 0    | 0    | 0    | 0 | 0    |
| Fruit                                     | 0    | 0    | 0    | 0 | 0    |
| Livestock                                 | 0    | 0    | 0    | 0 | 0.01 |
| Oil crops                                 | 0    | 0    | 0    | 0 | 0    |
| Pulses                                    | 0    | 0    | 0    | 0 | 0    |
| Roots & tubers                            | 0    | 0    | 0    | 0 | 0    |
| Sugar crops                               | 0    | 0    | 0    | 0 | 0    |
| Vegetables                                | 0    | 0    | 0    | 0 | 0    |
| <b>Viet Nam</b>                           |      |      |      |   |      |
| Cereals                                   | 0    | 0    | 0    | 0 | 0    |
| Fiber                                     | 0    | 0    | 0    | 0 | 0    |
| Fruit                                     | 0    | 0    | 0    | 0 | 0    |
| Livestock                                 | 0.01 | 0.01 | 0    | 0 | 0    |
| Oil crops                                 | 0    | 0    | 0    | 0 | 0    |
| Pulses                                    | 0    | 0    | 0    | 0 | 0    |
| Roots & tubers                            | 0    | 0    | 0    | 0 | 0    |
| Sugar crops                               | 0    | 0    | 0    | 0 | 0    |
| Vegetables                                | 0    | 0    | 0    | 0 | 0    |
| <b>Yemen</b>                              |      |      |      |   |      |
| Cereals                                   | 0    | 0    | 0    | 0 | 0    |
| Fiber                                     | 0    | 0    | 0    | 0 | 0    |
| Fruit                                     | 0    | 0    | 0    | 0 | 0    |
| Livestock                                 | 0    | 0    | 0    | 0 | 0    |
| Oil crops                                 | 0    | 0    | 0    | 0 | 0    |
| Pulses                                    | 0    | 0    | 0    | 0 | 0    |
| Roots & tubers                            | 0    | 0    | 0    | 0 | 0    |
| Sugar crops                               | 0    | 0    | 0    | 0 | 0    |
| Vegetables                                | 0    | 0    | 0    | 0 | 0    |
| <b>Zambia</b>                             |      |      |      |   |      |
| Cereals                                   | 0    | 0    | 0    | 0 | 0    |
| Fiber                                     | 0    | 0    | 0    | 0 | 0    |
| Fruit                                     | 0    | 0    | 0    | 0 | 0    |

|                 |   |   |   |   |   |
|-----------------|---|---|---|---|---|
| Livestock       | 0 | 0 | 0 | 0 | 0 |
| Oil crops       | 0 | 0 | 0 | 0 | 0 |
| Pulses          | 0 | 0 | 0 | 0 | 0 |
| Roots & tubers  | 0 | 0 | 0 | 0 | 0 |
| Sugar crops     | 0 | 0 | 0 | 0 | 0 |
| Vegetables      | 0 | 0 | 0 | 0 | 0 |
| <b>Zimbabwe</b> |   |   |   |   |   |
| Cereals         | 0 | 0 | 0 | 0 | 0 |
| Fiber           | 0 | 0 | 0 | 0 | 0 |
| Fruit           | 0 | 0 | 0 | 0 | 0 |
| Livestock       | 0 | 0 | 0 | 0 | 0 |
| Oil crops       | 0 | 0 | 0 | 0 | 0 |
| Pulses          | 0 | 0 | 0 | 0 | 0 |
| Roots & tubers  | 0 | 0 | 0 | 0 | 0 |
| Sugar crops     | 0 | 0 | 0 | 0 | 0 |
| Vegetables      | 0 | 0 | 0 | 0 | 0 |

**Zinc production (T)**

|                    | <b>&lt; 2 ha</b> | <b>2 - 20 ha</b> | <b>20 - 50 ha</b> | <b>50 - 200 ha</b> | <b>&gt; 200 ha</b> |
|--------------------|------------------|------------------|-------------------|--------------------|--------------------|
| <b>Afghanistan</b> |                  |                  |                   |                    |                    |
| Cereals            | 39.12            | 96.06            | 12.43             | 41.1               | 0                  |
| Fiber              | 0.05             | 1.61             | 0.29              | 0.05               | 0                  |
| Fruit              | 0.03             | 0.19             | 0.03              | 0.01               | 0                  |
| Livestock          | 6.32             | 8.17             | 0.75              | 0.13               | 0                  |
| Oil crops          | 1.2              | 1.52             | 0.13              | 0.02               | 0                  |
| Pulses             | 0.1              | 0.21             | 0.03              | 0.05               | 0                  |
| Roots & tubers     | 0.17             | 0.37             | 0.05              | 0.07               | 0                  |
| Sugar crops        | 0.01             | 0.01             | 0                 | 0                  | 0                  |
| Vegetables         | 0                | 0                | 0                 | 0                  | 0                  |
| <b>Albania</b>     |                  |                  |                   |                    |                    |
| Cereals            | 2.55             | 7.98             | 1.99              | 1.95               | 0.09               |
| Fiber              | 0                | 0.02             | 0.01              | 0.02               | 0                  |
| Fruit              | 0.01             | 0.05             | 0.02              | 0.02               | 0                  |
| Livestock          | 1.41             | 4.12             | 0.82              | 0.62               | 0.03               |
| Oil crops          | 0.03             | 0.08             | 0.02              | 0.01               | 0                  |
| Pulses             | 0.12             | 0.36             | 0.07              | 0.06               | 0                  |
| Roots & tubers     | 0.06             | 0.18             | 0.05              | 0.06               | 0                  |
| Sugar crops        | 0.02             | 0.06             | 0.02              | 0.02               | 0                  |
| Vegetables         | 0.05             | 0.17             | 0.05              | 0.06               | 0                  |
| <b>Algeria</b>     |                  |                  |                   |                    |                    |
| Cereals            | 15.67            | 58.43            | 17.34             | 19.89              | 26.97              |
| Fiber              | 0                | 0                | 0                 | 0                  | 0                  |
| Fruit              | 0.33             | 1.43             | 0.5               | 0.26               | 0.09               |
| Livestock          | 2.86             | 10.86            | 3.26              | 2.79               | 2.88               |
| Oil crops          | 0.23             | 0.76             | 0.2               | 0.27               | 0.41               |
| Pulses             | 0.03             | 0.09             | 0.03              | 0.03               | 0.05               |

|                  |       |       |       |        |         |
|------------------|-------|-------|-------|--------|---------|
| Roots & tubers   | 0.6   | 1.95  | 0.51  | 0.52   | 0.65    |
| Sugar crops      | 0     | 0     | 0     | 0      | 0       |
| Vegetables       | 0.3   | 1.22  | 0.38  | 0.27   | 0.19    |
| <b>Angola</b>    |       |       |       |        |         |
| Cereals          | 3.51  | 7.1   | 0.8   | 0.46   | 0       |
| Fiber            | 0.06  | 0.13  | 0.02  | 0.02   | 0       |
| Fruit            | 0.35  | 0.67  | 0.07  | 0.05   | 0       |
| Livestock        | 1.82  | 2.82  | 0.24  | 0.22   | 0       |
| Oil crops        | 0.21  | 0.39  | 0.04  | 0.03   | 0       |
| Pulses           | 0.68  | 1.57  | 0.19  | 0.19   | 0       |
| Roots & tubers   | 7.44  | 17.5  | 2.18  | 1.57   | 0       |
| Sugar crops      | 0.01  | 0.03  | 0     | 0      | 0       |
| Vegetables       | 0.01  | 0.01  | 0     | 0      | 0       |
| <b>Argentina</b> |       |       |       |        |         |
| Cereals          | 0.46  | 12.06 | 19.95 | 112.7  | 831.4   |
| Fiber            | 0.08  | 1.34  | 1.46  | 3.98   | 21.37   |
| Fruit            | 0     | 0.03  | 0.07  | 0.4    | 2.59    |
| Livestock        | 0.59  | 10.28 | 11.48 | 28.64  | 105.26  |
| Oil crops        | 0.84  | 23.11 | 39.29 | 237.55 | 1857.36 |
| Pulses           | 0.01  | 0.25  | 0.41  | 1.62   | 6.62    |
| Roots & tubers   | 0.01  | 0.29  | 0.4   | 1.24   | 3.44    |
| Sugar crops      | 0.01  | 0.13  | 0.2   | 0.67   | 1.49    |
| Vegetables       | 0     | 0.04  | 0.06  | 0.3    | 1.76    |
| <b>Armenia</b>   |       |       |       |        |         |
| Cereals          | 0.96  | 7.08  | 2.92  | 1.54   | 0.27    |
| Fiber            | 0     | 0     | 0     | 0      | 0       |
| Fruit            | 0.01  | 0.1   | 0.04  | 0.02   | 0       |
| Livestock        | 0.48  | 2.49  | 0.92  | 0.47   | 0.08    |
| Oil crops        | 0     | 0     | 0     | 0      | 0       |
| Pulses           | 0.01  | 0.07  | 0.03  | 0.01   | 0       |
| Roots & tubers   | 0.09  | 0.68  | 0.28  | 0.15   | 0.03    |
| Sugar crops      | 0.01  | 0.03  | 0.01  | 0.01   | 0       |
| Vegetables       | 0.04  | 0.3   | 0.12  | 0.07   | 0.01    |
| <b>Australia</b> |       |       |       |        |         |
| Cereals          | 0     | 1.67  | 7.15  | 66.71  | 897.35  |
| Fiber            | 0     | 0.09  | 0.4   | 3.92   | 69.35   |
| Fruit            | 0     | 0     | 0.01  | 0.13   | 1.76    |
| Livestock        | 0     | 0.34  | 1.36  | 12.39  | 129.94  |
| Oil crops        | 0     | 0.13  | 0.55  | 4.94   | 50.91   |
| Pulses           | 0     | 0.01  | 0.06  | 0.61   | 12.1    |
| Roots & tubers   | 0     | 0.01  | 0.03  | 0.28   | 2.5     |
| Sugar crops      | 0     | 0     | 0.03  | 0.27   | 3.41    |
| Vegetables       | 0     | 0     | 0.01  | 0.08   | 0.87    |
| <b>Austria</b>   |       |       |       |        |         |
| Cereals          | 11.09 | 44.35 | 20.08 | 36.17  | 4.34    |
| Fiber            | 0     | 0     | 0     | 0      | 0       |

|                   |        |        |       |       |       |
|-------------------|--------|--------|-------|-------|-------|
| Fruit             | 0.05   | 0.17   | 0.06  | 0.1   | 0.01  |
| Livestock         | 1.41   | 8.63   | 5.86  | 11.85 | 1.44  |
| Oil crops         | 1.22   | 4.57   | 1.85  | 3.17  | 0.37  |
| Pulses            | 0.27   | 1.07   | 0.49  | 0.88  | 0.11  |
| Roots & tubers    | 0.19   | 0.66   | 0.24  | 0.38  | 0.04  |
| Sugar crops       | 0.87   | 3.13   | 1.19  | 1.97  | 0.23  |
| Vegetables        | 0.02   | 0.08   | 0.04  | 0.07  | 0.01  |
| <b>Azerbaijan</b> |        |        |       |       |       |
| Cereals           | 11.34  | 36.45  | 9.82  | 7.8   | 7.82  |
| Fiber             | 1.32   | 4.25   | 1.14  | 0.91  | 0.92  |
| Fruit             | 0.02   | 0.06   | 0.02  | 0.01  | 0.01  |
| Livestock         | 1.4    | 4.57   | 1.23  | 1.16  | 1.39  |
| Oil crops         | 0.06   | 0.2    | 0.06  | 0.04  | 0.04  |
| Pulses            | 0.05   | 0.29   | 0.11  | 0.07  | 0.03  |
| Roots & tubers    | 0.35   | 1.13   | 0.3   | 0.24  | 0.24  |
| Sugar crops       | 0.05   | 0.16   | 0.04  | 0.03  | 0.03  |
| Vegetables        | 0.16   | 0.51   | 0.14  | 0.09  | 0.06  |
| <b>Bangladesh</b> |        |        |       |       |       |
| Cereals           | 123.88 | 270.45 | 33.31 | 64.57 | 0     |
| Fiber             | 0.79   | 1.77   | 0.22  | 0.24  | 0     |
| Fruit             | 0.26   | 0.58   | 0.07  | 0.16  | 0     |
| Livestock         | 8.13   | 15.11  | 1.69  | 2.63  | 0     |
| Oil crops         | 2.98   | 8.53   | 1.17  | 2.01  | 0     |
| Pulses            | 0.59   | 1.35   | 0.17  | 0.37  | 0     |
| Roots & tubers    | 2.88   | 6.03   | 0.73  | 2.19  | 0     |
| Sugar crops       | 0.15   | 0.31   | 0.04  | 0.09  | 0     |
| Vegetables        | 0.34   | 0.74   | 0.09  | 0.17  | 0     |
| <b>Belarus</b>    |        |        |       |       |       |
| Cereals           | 12.83  | 48.64  | 20.24 | 58.79 | 20.62 |
| Fiber             | 0      | 0      | 0     | 0     | 0     |
| Fruit             | 0      | 0.02   | 0.02  | 0.06  | 0.02  |
| Livestock         | 2.6    | 10.71  | 5.01  | 15.44 | 5.52  |
| Oil crops         | 0.7    | 2.65   | 1.11  | 3.17  | 1.09  |
| Pulses            | 0.32   | 1.21   | 0.51  | 1.45  | 0.5   |
| Roots & tubers    | 0.34   | 3.02   | 2.45  | 9.11  | 3.39  |
| Sugar crops       | 0.16   | 1.49   | 1.24  | 4.84  | 1.85  |
| Vegetables        | 0.05   | 0.2    | 0.09  | 0.23  | 0.07  |
| <b>Belgium</b>    |        |        |       |       |       |
| Cereals           | 5.8    | 22.82  | 10.26 | 36.02 | 14.22 |
| Fiber             | 0      | 0      | 0     | 0     | 0     |
| Fruit             | 0.01   | 0.04   | 0.02  | 0.04  | 0.01  |
| Livestock         | 3.74   | 14.14  | 5.72  | 14.07 | 4.26  |
| Oil crops         | 0      | 0.09   | 0.1   | 0.92  | 0.5   |
| Pulses            | 0.01   | 0.04   | 0.02  | 0.06  | 0.01  |
| Roots & tubers    | 0.82   | 2.73   | 0.87  | 1.49  | 0.3   |
| Sugar crops       | 0.95   | 3.99   | 1.95  | 6.38  | 2.35  |

|                                         |      |       |      |       |       |
|-----------------------------------------|------|-------|------|-------|-------|
| Vegetables                              | 0.04 | 0.14  | 0.06 | 0.15  | 0.05  |
| <b>Belize</b>                           |      |       |      |       |       |
| Cereals                                 | 0.02 | 0.14  | 0.36 | 0.16  | 0.07  |
| Fiber                                   | 0    | 0     | 0    | 0     | 0     |
| Fruit                                   | 0    | 0.04  | 0.11 | 0.05  | 0.02  |
| Livestock                               | 0.02 | 0.04  | 0.06 | 0.03  | 0.03  |
| Oil crops                               | 0    | 0.01  | 0.01 | 0.01  | 0     |
| Pulses                                  | 0    | 0.02  | 0.06 | 0.03  | 0.01  |
| Roots & tubers                          | 0    | 0     | 0    | 0     | 0     |
| Sugar crops                             | 0    | 0.02  | 0.05 | 0.02  | 0.01  |
| Vegetables                              | 0    | 0     | 0    | 0     | 0     |
| <b>Benin</b>                            |      |       |      |       |       |
| Cereals                                 | 5.31 | 8.65  | 0.82 | 0     | 0     |
| Fiber                                   | 3.37 | 10.73 | 1.54 | 0.01  | 0     |
| Fruit                                   | 0.03 | 0.06  | 0.01 | 0     | 0     |
| Livestock                               | 0.49 | 0.84  | 0.08 | 0     | 0     |
| Oil crops                               | 0.51 | 0.73  | 0.06 | 0     | 0     |
| Pulses                                  | 1.05 | 1.81  | 0.18 | 0     | 0     |
| Roots & tubers                          | 5.36 | 6.72  | 0.43 | 0     | 0     |
| Sugar crops                             | 0    | 0     | 0    | 0     | 0     |
| Vegetables                              | 0.08 | 0.13  | 0.01 | 0     | 0     |
| <b>Bhutan</b>                           |      |       |      |       |       |
| Cereals                                 | 1.03 | 1.5   | 0.14 | 0.03  | 0     |
| Fiber                                   | 0    | 0     | 0    | 0     | 0     |
| Fruit                                   | 0.01 | 0.01  | 0    | 0     | 0     |
| Livestock                               | 0.14 | 0.2   | 0.02 | 0     | 0     |
| Oil crops                               | 0.03 | 0.04  | 0    | 0     | 0     |
| Pulses                                  | 0.09 | 0.11  | 0.01 | 0     | 0     |
| Roots & tubers                          | 0.05 | 0.07  | 0.01 | 0     | 0     |
| Sugar crops                             | 0    | 0     | 0    | 0     | 0     |
| Vegetables                              | 0    | 0     | 0    | 0     | 0     |
| <b>Bolivia (Plurinational State of)</b> |      |       |      |       |       |
| Cereals                                 | 0.15 | 2.44  | 2.56 | 5.48  | 18.25 |
| Fiber                                   | 0.02 | 0.32  | 0.36 | 0.99  | 4.79  |
| Fruit                                   | 0.01 | 0.15  | 0.13 | 0.16  | 0.21  |
| Livestock                               | 0.1  | 1.63  | 1.65 | 2.94  | 6.53  |
| Oil crops                               | 0.07 | 1.57  | 2.43 | 11.29 | 68.01 |
| Pulses                                  | 0.01 | 0.15  | 0.14 | 0.23  | 0.62  |
| Roots & tubers                          | 0.04 | 0.54  | 0.5  | 0.66  | 0.95  |
| Sugar crops                             | 0    | 0.02  | 0.02 | 0.09  | 0.46  |
| Vegetables                              | 0    | 0.02  | 0.02 | 0.04  | 0.16  |
| <b>Bosnia and Herzegovina</b>           |      |       |      |       |       |
| Cereals                                 | 2.64 | 10.05 | 4.32 | 7.93  | 1.02  |
| Fiber                                   | 0    | 0     | 0    | 0     | 0     |
| Fruit                                   | 0    | 0.01  | 0.01 | 0.01  | 0     |
| Livestock                               | 0.41 | 1.59  | 0.68 | 1.17  | 0.14  |

|                          |      |       |       |        |         |
|--------------------------|------|-------|-------|--------|---------|
| Oil crops                | 0.05 | 0.23  | 0.12  | 0.23   | 0.03    |
| Pulses                   | 0.05 | 0.2   | 0.09  | 0.16   | 0.02    |
| Roots & tubers           | 0.09 | 0.36  | 0.15  | 0.27   | 0.04    |
| Sugar crops              | 0    | 0     | 0     | 0      | 0       |
| Vegetables               | 0.01 | 0.04  | 0.02  | 0.03   | 0       |
| <b>Botswana</b>          |      |       |       |        |         |
| Cereals                  | 0.07 | 0.33  | 0.05  | 0.17   | 0       |
| Fiber                    | 0.02 | 0.09  | 0.01  | 0.02   | 0       |
| Fruit                    | 0    | 0     | 0     | 0      | 0       |
| Livestock                | 0.16 | 0.91  | 0.15  | 0.63   | 0       |
| Oil crops                | 0.02 | 0.07  | 0.01  | 0.04   | 0       |
| Pulses                   | 0.01 | 0.03  | 0.01  | 0.03   | 0       |
| Roots & tubers           | 0    | 0     | 0     | 0      | 0       |
| Sugar crops              | 0    | 0     | 0     | 0      | 0       |
| Vegetables               | 0    | 0     | 0     | 0      | 0       |
| <b>Brazil</b>            |      |       |       |        |         |
| Cereals                  | 1.91 | 33.93 | 39.2  | 125.87 | 739.98  |
| Fiber                    | 0.05 | 1.76  | 3.21  | 22.11  | 186.43  |
| Fruit                    | 0.15 | 2.36  | 2.23  | 3.54   | 10.42   |
| Livestock                | 2.98 | 48.11 | 47.87 | 91.78  | 325.5   |
| Oil crops                | 0.86 | 22.73 | 37.63 | 259.6  | 2334.33 |
| Pulses                   | 0.81 | 12.67 | 11.78 | 17.08  | 43      |
| Roots & tubers           | 0.74 | 11.75 | 11.27 | 17.84  | 42.42   |
| Sugar crops              | 0.02 | 0.68  | 1.17  | 6.23   | 40.23   |
| Vegetables               | 0.04 | 0.71  | 0.71  | 1.36   | 4.42    |
| <b>Brunei Darussalam</b> |      |       |       |        |         |
| Cereals                  | 0    | 0.01  | 0     | 0      | 0       |
| Fiber                    | 0    | 0     | 0     | 0      | 0       |
| Fruit                    | 0    | 0     | 0     | 0      | 0       |
| Livestock                | 0    | 0.2   | 0.03  | 0.01   | 0       |
| Oil crops                | 0    | 0     | 0     | 0      | 0       |
| Pulses                   | 0    | 0     | 0     | 0      | 0       |
| Roots & tubers           | 0    | 0.01  | 0     | 0      | 0       |
| Sugar crops              | 0    | 0     | 0     | 0      | 0       |
| Vegetables               | 0    | 0     | 0     | 0      | 0       |
| <b>Bulgaria</b>          |      |       |       |        |         |
| Cereals                  | 5.71 | 32.47 | 21.24 | 74.27  | 26.84   |
| Fiber                    | 0.02 | 0.04  | 0.01  | 0      | 0       |
| Fruit                    | 0.02 | 0.08  | 0.03  | 0.07   | 0.02    |
| Livestock                | 0.89 | 3.48  | 1.48  | 3.51   | 0.98    |
| Oil crops                | 0.43 | 3.78  | 3.11  | 13.64  | 5.65    |
| Pulses                   | 0.02 | 0.07  | 0.04  | 0.12   | 0.04    |
| Roots & tubers           | 0.06 | 0.24  | 0.13  | 0.29   | 0.05    |
| Sugar crops              | 0    | 0.01  | 0.01  | 0.03   | 0.01    |
| Vegetables               | 0.02 | 0.07  | 0.03  | 0.11   | 0.04    |
| <b>Burkina Faso</b>      |      |       |       |        |         |

|                 |       |        |        |        |        |
|-----------------|-------|--------|--------|--------|--------|
| Cereals         | 14.59 | 29.15  | 3.24   | 8.56   | 0      |
| Fiber           | 9.72  | 18.01  | 1.96   | 7.31   | 0      |
| Fruit           | 0     | 0      | 0      | 0      | 0      |
| Livestock       | 2.74  | 3.91   | 0.31   | 0.74   | 0      |
| Oil crops       | 0.25  | 0.79   | 0.11   | 0.87   | 0      |
| Pulses          | 0.08  | 0.12   | 0.01   | 0.03   | 0      |
| Roots & tubers  | 0.05  | 0.1    | 0.01   | 0.05   | 0      |
| Sugar crops     | 0     | 0.02   | 0      | 0.02   | 0      |
| Vegetables      | 0     | 0.01   | 0      | 0      | 0      |
| <b>Burundi</b>  |       |        |        |        |        |
| Cereals         | 2.04  | 2.46   | 0.13   | 0      | 0      |
| Fiber           | 0.13  | 0.16   | 0.01   | 0      | 0      |
| Fruit           | 0.7   | 0.84   | 0.04   | 0      | 0      |
| Livestock       | 0.32  | 0.39   | 0.02   | 0      | 0      |
| Oil crops       | 0.06  | 0.07   | 0      | 0      | 0      |
| Pulses          | 2.96  | 3.57   | 0.18   | 0      | 0      |
| Roots & tubers  | 1.6   | 1.93   | 0.1    | 0      | 0      |
| Sugar crops     | 0.01  | 0.01   | 0      | 0      | 0      |
| Vegetables      | 0     | 0      | 0      | 0      | 0      |
| <b>Cambodia</b> |       |        |        |        |        |
| Cereals         | 21.04 | 48.58  | 3.33   | 1.36   | 0      |
| Fiber           | 0.01  | 0.01   | 0      | 0      | 0      |
| Fruit           | 0.05  | 0.11   | 0.01   | 0      | 0      |
| Livestock       | 1.66  | 2.95   | 0.14   | 0.05   | 0      |
| Oil crops       | 3.89  | 6.54   | 0.34   | 0.13   | 0      |
| Pulses          | 0.5   | 0.85   | 0.04   | 0.01   | 0      |
| Roots & tubers  | 1.64  | 2.93   | 0.15   | 0.06   | 0      |
| Sugar crops     | 0.01  | 0.01   | 0      | 0      | 0      |
| Vegetables      | 0     | 0      | 0      | 0      | 0      |
| <b>Cameroon</b> |       |        |        |        |        |
| Cereals         | 11.91 | 18.12  | 1.54   | 1.23   | 0      |
| Fiber           | 6.05  | 10.06  | 0.96   | 0.33   | 0      |
| Fruit           | 1.03  | 1.6    | 0.14   | 0.21   | 0      |
| Livestock       | 2.66  | 3.26   | 0.22   | 0      | 0      |
| Oil crops       | 0.37  | 0.59   | 0.05   | 0.02   | 0      |
| Pulses          | 2.88  | 3.49   | 0.2    | 0      | 0      |
| Roots & tubers  | 2.47  | 4.4    | 0.44   | 1.64   | 0      |
| Sugar crops     | 0.04  | 0.06   | 0      | 0.01   | 0      |
| Vegetables      | 0.36  | 0.53   | 0.04   | 0.02   | 0      |
| <b>Canada</b>   |       |        |        |        |        |
| Cereals         | 0.54  | 124.17 | 195.25 | 614.35 | 653.89 |
| Fiber           | 0     | 0      | 0      | 0      | 0      |
| Fruit           | 0     | 0.01   | 0.03   | 0.09   | 0.05   |
| Livestock       | 0.05  | 13.17  | 21.03  | 51.47  | 31.88  |
| Oil crops       | 0.25  | 55.75  | 85.41  | 237.85 | 233.68 |
| Pulses          | 0.04  | 8.63   | 13.28  | 41.23  | 45.33  |

|                                 |         |         |      |         |       |
|---------------------------------|---------|---------|------|---------|-------|
| Roots & tubers                  | 0.01    | 1.24    | 2.03 | 4.52    | 2.74  |
| Sugar crops                     | 0       | 0.06    | 0.09 | 0.69    | 1.17  |
| Vegetables                      | 0       | 0.13    | 0.26 | 0.76    | 0.44  |
| <b>Central African Republic</b> |         |         |      |         |       |
| Cereals                         | 1.36    | 1.82    | 0.12 | 0       | 0     |
| Fiber                           | 0.08    | 0.09    | 0.01 | 0       | 0     |
| Fruit                           | 0.07    | 0.12    | 0.01 | 0       | 0     |
| Oil crops                       | 1.31    | 1.77    | 0.13 | 0       | 0     |
| Pulses                          | 0.09    | 0.16    | 0.02 | 0       | 0     |
| Roots & tubers                  | 1.04    | 1.31    | 0.08 | 0       | 0     |
| Sugar crops                     | 0       | 0.01    | 0    | 0       | 0     |
| Vegetables                      | 0       | 0       | 0    | 0       | 0     |
| <b>Chad</b>                     |         |         |      |         |       |
| Cereals                         | 9.95    | 17.63   | 1.8  | 8.02    | 0     |
| Fiber                           | 2.61    | 4.89    | 0.52 | 0.84    | 0     |
| Fruit                           | 0.01    | 0.03    | 0    | 0.02    | 0     |
| Livestock                       | 1.69    | 2.56    | 0.23 | 0.49    | 0     |
| Oil crops                       | 0.92    | 1.46    | 0.13 | 0.33    | 0     |
| Pulses                          | 0.75    | 1.33    | 0.13 | 0.43    | 0     |
| Roots & tubers                  | 0.45    | 0.86    | 0.09 | 0.25    | 0     |
| Sugar crops                     | 0.01    | 0.02    | 0    | 0       | 0     |
| Vegetables                      | 0.01    | 0.02    | 0    | 0.01    | 0     |
| <b>Chile</b>                    |         |         |      |         |       |
| Cereals                         | 0.54    | 8.8     | 9.03 | 18.36   | 61.85 |
| Fiber                           | 0       | 0       | 0    | 0       | 0     |
| Fruit                           | 0.01    | 0.19    | 0.19 | 0.38    | 1.33  |
| Livestock                       | 0.17    | 2.83    | 2.97 | 6.15    | 17.92 |
| Oil crops                       | 0.01    | 0.21    | 0.21 | 0.42    | 1.47  |
| Pulses                          | 0.01    | 0.13    | 0.12 | 0.19    | 0.63  |
| Roots & tubers                  | 0.01    | 0.16    | 0.18 | 0.43    | 1.66  |
| Sugar crops                     | 0.03    | 0.53    | 0.53 | 1.04    | 3.65  |
| Vegetables                      | 0.01    | 0.21    | 0.21 | 0.41    | 1.44  |
| <b>China</b>                    |         |         |      |         |       |
| Cereals                         | 5090.79 | 2372.95 | 0    | 1181.91 | 0     |
| Fiber                           | 531.09  | 382.61  | 0    | 291.34  | 0     |
| Fruit                           | 14.46   | 7.12    | 0    | 2.4     | 0     |
| Livestock                       | 972.53  | 395.74  | 0    | 169.7   | 0     |
| Oil crops                       | 701.88  | 432.93  | 0    | 249.09  | 0     |
| Pulses                          | 45.25   | 21.97   | 0    | 15.58   | 0     |
| Roots & tubers                  | 240.91  | 71.92   | 0    | 23.95   | 0     |
| Sugar crops                     | 12.48   | 12.77   | 0    | 6.42    | 0     |
| Vegetables                      | 49.12   | 23.01   | 0    | 9.76    | 0     |
| <b>Colombia</b>                 |         |         |      |         |       |
| Cereals                         | 0.11    | 2.19    | 2.9  | 9.38    | 35.72 |
| Fiber                           | 0.06    | 0.95    | 0.92 | 1.54    | 3.99  |
| Fruit                           | 0.02    | 0.42    | 0.45 | 1.02    | 3.11  |



|                   |      |       |      |       |       |
|-------------------|------|-------|------|-------|-------|
| Livestock         | 0.48 | 7.68  | 7.53 | 13.13 | 37.37 |
| Oil crops         | 0.02 | 0.27  | 0.27 | 0.56  | 2.54  |
| Pulses            | 0.03 | 0.54  | 0.59 | 1.27  | 2.87  |
| Roots & tubers    | 0.08 | 1.22  | 1.21 | 2.15  | 5.74  |
| Sugar crops       | 0.03 | 0.46  | 0.46 | 0.83  | 1.98  |
| Vegetables        | 0.01 | 0.16  | 0.15 | 0.26  | 0.66  |
| <b>Congo</b>      |      |       |      |       |       |
| Cereals           | 0.11 | 0.17  | 0.01 | 0     | 0     |
| Fiber             | 0    | 0     | 0    | 0     | 0     |
| Fruit             | 0.03 | 0.09  | 0.01 | 0.01  | 0     |
| Livestock         | 0.07 | 0.14  | 0.02 | 0.06  | 0     |
| Oil crops         | 0.01 | 0.02  | 0    | 0     | 0     |
| Pulses            | 0.09 | 0.16  | 0.02 | 0.03  | 0     |
| Roots & tubers    | 1    | 1.85  | 0.19 | 0.07  | 0     |
| Sugar crops       | 0.02 | 0.03  | 0    | 0     | 0     |
| Vegetables        | 0    | 0     | 0    | 0     | 0     |
| <b>Costa Rica</b> |      |       |      |       |       |
| Cereals           | 0    | 0.16  | 0.59 | 0.55  | 0.94  |
| Fiber             | 0    | 0     | 0.01 | 0.01  | 0.02  |
| Fruit             | 0    | 0.24  | 0.9  | 0.84  | 1.43  |
| Livestock         | 0.02 | 0.51  | 1.73 | 1.75  | 3.54  |
| Oil crops         | 0    | 0.01  | 0.04 | 0.04  | 0.07  |
| Pulses            | 0    | 0.02  | 0.07 | 0.06  | 0.11  |
| Roots & tubers    | 0    | 0.03  | 0.13 | 0.12  | 0.2   |
| Sugar crops       | 0    | 0.03  | 0.12 | 0.11  | 0.18  |
| Vegetables        | 0    | 0.01  | 0.03 | 0.03  | 0.06  |
| <b>Croatia</b>    |      |       |      |       |       |
| Cereals           | 5.62 | 20.35 | 7.98 | 22.87 | 7.94  |
| Fiber             | 0    | 0     | 0    | 0     | 0     |
| Fruit             | 0.02 | 0.05  | 0.02 | 0.05  | 0.02  |
| Livestock         | 0.48 | 1.86  | 0.81 | 2.87  | 1.16  |
| Oil crops         | 0.95 | 3.3   | 1.19 | 3.3   | 1.15  |
| Pulses            | 0.01 | 0.04  | 0.02 | 0.05  | 0.02  |
| Roots & tubers    | 0.06 | 0.21  | 0.07 | 0.2   | 0.07  |
| Sugar crops       | 0.35 | 1.27  | 0.49 | 1.41  | 0.5   |
| Vegetables        | 0.01 | 0.03  | 0.01 | 0.03  | 0.01  |
| <b>Cuba</b>       |      |       |      |       |       |
| Cereals           | 0.99 | 2.25  | 2.15 | 1.56  | 2.44  |
| Fiber             | 0    | 0     | 0    | 0     | 0     |
| Fruit             | 0.1  | 0.23  | 0.23 | 0.18  | 0.3   |
| Livestock         | 0.38 | 1.15  | 1.82 | 1.4   | 2.38  |
| Oil crops         | 0.07 | 0.16  | 0.15 | 0.11  | 0.17  |
| Pulses            | 0.26 | 0.58  | 0.55 | 0.4   | 0.63  |
| Roots & tubers    | 0.33 | 0.75  | 0.72 | 0.52  | 0.82  |
| Sugar crops       | 0.12 | 0.28  | 0.26 | 0.19  | 0.3   |
| Vegetables        | 0.13 | 0.3   | 0.28 | 0.21  | 0.32  |

|                                         |       |       |       |        |       |
|-----------------------------------------|-------|-------|-------|--------|-------|
| <b>Cyprus</b>                           |       |       |       |        |       |
| Cereals                                 | 0     | 0     | 0     | 0      | 0     |
| Fiber                                   | 0     | 0     | 0     | 0      | 0     |
| Fruit                                   | 0     | 0     | 0     | 0      | 0     |
| Livestock                               | 0.25  | 1.14  | 0.42  | 0.2    | 0.04  |
| Oil crops                               | 0     | 0     | 0     | 0      | 0     |
| Pulses                                  | 0     | 0     | 0     | 0      | 0     |
| Roots & tubers                          | 0     | 0     | 0     | 0      | 0     |
| Sugar crops                             | 0     | 0     | 0     | 0      | 0     |
| Vegetables                              | 0     | 0     | 0     | 0      | 0     |
| <b>Czech Republic</b>                   |       |       |       |        |       |
| Cereals                                 | 18.47 | 68.89 | 29    | 88.61  | 31.24 |
| Fiber                                   | 0     | 0     | 0     | 0      | 0     |
| Fruit                                   | 0.01  | 0.04  | 0.01  | 0.03   | 0.01  |
| Livestock                               | 1.09  | 5.29  | 3.06  | 9.72   | 3.27  |
| Oil crops                               | 3.37  | 12.95 | 5.74  | 18.19  | 6.49  |
| Pulses                                  | 0.25  | 0.87  | 0.32  | 0.83   | 0.27  |
| Roots & tubers                          | 0.09  | 0.43  | 0.27  | 0.81   | 0.23  |
| Sugar crops                             | 0.82  | 2.8   | 0.98  | 2.87   | 1.08  |
| Vegetables                              | 0.01  | 0.04  | 0.02  | 0.04   | 0.01  |
| <b>Democratic Republic of the Congo</b> |       |       |       |        |       |
| Cereals                                 | 6.31  | 10.72 | 1.04  | 2.67   | 0     |
| Fiber                                   | 0.53  | 0.99  | 0.1   | 0.29   | 0     |
| Fruit                                   | 0.5   | 0.81  | 0.07  | 0.23   | 0     |
| Livestock                               | 0.53  | 1     | 0.1   | 0.09   | 0     |
| Oil crops                               | 0.36  | 0.61  | 0.06  | 0.11   | 0     |
| Pulses                                  | 0.97  | 1.59  | 0.15  | 0.37   | 0     |
| Roots & tubers                          | 12.19 | 22.91 | 2.42  | 6.17   | 0     |
| Sugar crops                             | 0.04  | 0.08  | 0.01  | 0.03   | 0     |
| Vegetables                              | 0.04  | 0.08  | 0.01  | 0.03   | 0     |
| <b>Denmark</b>                          |       |       |       |        |       |
| Cereals                                 | 6.81  | 56.68 | 43.87 | 147.66 | 51.33 |
| Fiber                                   | 0     | 0     | 0     | 0      | 0     |
| Fruit                                   | 0     | 0     | 0     | 0.01   | 0     |
| Livestock                               | 1.26  | 10.22 | 7.79  | 24.95  | 8.31  |
| Oil crops                               | 0.5   | 4.14  | 3.2   | 10.71  | 3.7   |
| Pulses                                  | 0.02  | 0.2   | 0.15  | 0.51   | 0.18  |
| Roots & tubers                          | 0.07  | 0.61  | 0.47  | 1.6    | 0.56  |
| Sugar crops                             | 0.15  | 1.22  | 0.94  | 3.17   | 1.1   |
| Vegetables                              | 0     | 0.02  | 0.02  | 0.05   | 0.02  |
| <b>Djibouti</b>                         |       |       |       |        |       |
| Cereals                                 | 0     | 0     | 0     | 0      | 0     |
| Fiber                                   | 0     | 0     | 0     | 0      | 0     |
| Fruit                                   | 0     | 0     | 0     | 0      | 0     |
| Livestock                               | 0     | 0     | 0     | 0      | 0     |

|                          |       |        |        |       |       |
|--------------------------|-------|--------|--------|-------|-------|
| Oil crops                | 0     | 0      | 0      | 0     | 0     |
| Pulses                   | 0     | 0      | 0      | 0     | 0     |
| Roots & tubers           | 0     | 0      | 0      | 0     | 0     |
| Sugar crops              | 0     | 0      | 0      | 0     | 0     |
| Vegetables               | 0     | 0      | 0      | 0     | 0     |
| <b>Dominica</b>          |       |        |        |       |       |
| Cereals                  | 0     | 0      | 0      | 0     | 0     |
| Fiber                    | 0     | 0      | 0      | 0     | 0     |
| Fruit                    | 0     | 0      | 0.01   | 0.01  | 0.01  |
| Livestock                | 0     | 0.01   | 0.02   | 0.01  | 0.01  |
| Oil crops                | 0     | 0.01   | 0.02   | 0.01  | 0.02  |
| Pulses                   | 0     | 0      | 0      | 0     | 0     |
| Roots & tubers           | 0     | 0      | 0.01   | 0.01  | 0.01  |
| Sugar crops              | 0     | 0      | 0      | 0     | 0     |
| Vegetables               | 0     | 0      | 0      | 0     | 0     |
| <b>Ecuador</b>           |       |        |        |       |       |
| Cereals                  | 0.33  | 5.11   | 4.85   | 7.08  | 12.5  |
| Fiber                    | 0     | 0.03   | 0.03   | 0.05  | 0.1   |
| Fruit                    | 0.1   | 1.49   | 1.31   | 1.45  | 2.17  |
| Livestock                | 0.29  | 4.55   | 4.35   | 6.76  | 15.47 |
| Oil crops                | 0     | 0.1    | 0.14   | 0.5   | 1.61  |
| Pulses                   | 0.01  | 0.09   | 0.09   | 0.12  | 0.22  |
| Roots & tubers           | 0.01  | 0.11   | 0.11   | 0.23  | 0.52  |
| Sugar crops              | 0.01  | 0.09   | 0.09   | 0.16  | 0.4   |
| Vegetables               | 0     | 0.02   | 0.02   | 0.03  | 0.04  |
| <b>Egypt</b>             |       |        |        |       |       |
| Cereals                  | 60.11 | 278.04 | 103.13 | 50.03 | 8.87  |
| Fiber                    | 4.25  | 19.68  | 7.3    | 3.54  | 0.63  |
| Fruit                    | 0.99  | 4.57   | 1.69   | 0.82  | 0.15  |
| Livestock                | 6.45  | 29.84  | 11.07  | 5.37  | 0.95  |
| Oil crops                | 0.77  | 3.58   | 1.33   | 0.64  | 0.11  |
| Pulses                   | 0.18  | 0.85   | 0.31   | 0.15  | 0.03  |
| Roots & tubers           | 0.81  | 3.75   | 1.39   | 0.67  | 0.12  |
| Sugar crops              | 1.58  | 7.31   | 2.71   | 1.32  | 0.23  |
| Vegetables               | 1.78  | 8.22   | 3.05   | 1.48  | 0.26  |
| <b>El Salvador</b>       |       |        |        |       |       |
| Cereals                  | 1.63  | 4.06   | 4.47   | 1.89  | 0.82  |
| Fiber                    | 0.01  | 0.03   | 0.03   | 0.01  | 0.01  |
| Fruit                    | 0.02  | 0.04   | 0.03   | 0.01  | 0.01  |
| Livestock                | 0.67  | 1.52   | 1.36   | 0.57  | 0.25  |
| Oil crops                | 0.12  | 0.26   | 0.2    | 0.09  | 0.04  |
| Pulses                   | 0.1   | 0.45   | 0.9    | 0.38  | 0.17  |
| Roots & tubers           | 0.01  | 0.03   | 0.02   | 0.01  | 0     |
| Sugar crops              | 0.1   | 0.2    | 0.11   | 0.05  | 0.02  |
| Vegetables               | 0.01  | 0.02   | 0.01   | 0.01  | 0     |
| <b>Equatorial Guinea</b> |       |        |        |       |       |

|                 |       |        |       |       |       |
|-----------------|-------|--------|-------|-------|-------|
| Cereals         | 0     | 0      | 0     | 0     | 0     |
| Fiber           | 0     | 0      | 0     | 0     | 0     |
| Fruit           | 0.03  | 0.03   | 0     | 0     | 0     |
| Livestock       | 0.01  | 0.01   | 0     | 0     | 0     |
| Oil crops       | 0.02  | 0.02   | 0     | 0     | 0     |
| Pulses          | 0     | 0      | 0     | 0     | 0     |
| Roots & tubers  | 0.14  | 0.17   | 0.01  | 0     | 0     |
| Sugar crops     | 0     | 0      | 0     | 0     | 0     |
| Vegetables      | 0     | 0      | 0     | 0     | 0     |
| <b>Eritrea</b>  |       |        |       |       |       |
| Cereals         | 2.43  | 4.93   | 0.55  | 0     | 0     |
| Fiber           | 0     | 0      | 0     | 0     | 0     |
| Fruit           | 0     | 0      | 0     | 0     | 0     |
| Livestock       | 0.52  | 0.92   | 0.09  | 0     | 0     |
| Oil crops       | 0.24  | 0.59   | 0.08  | 0     | 0     |
| Pulses          | 0.07  | 0.18   | 0.02  | 0     | 0     |
| Roots & tubers  | 0.01  | 0.01   | 0     | 0     | 0     |
| Sugar crops     | 0     | 0      | 0     | 0     | 0     |
| Vegetables      | 0     | 0      | 0     | 0     | 0     |
| <b>Estonia</b>  |       |        |       |       |       |
| Cereals         | 0.32  | 2.95   | 2.42  | 13.1  | 6.18  |
| Fiber           | 0     | 0      | 0     | 0     | 0     |
| Fruit           | 0     | 0      | 0     | 0     | 0     |
| Livestock       | 0.03  | 0.48   | 0.48  | 2.12  | 0.85  |
| Oil crops       | 0.06  | 0.54   | 0.45  | 2.6   | 1.26  |
| Pulses          | 0     | 0.03   | 0.02  | 0.13  | 0.06  |
| Roots & tubers  | 0     | 0.05   | 0.04  | 0.21  | 0.1   |
| Sugar crops     | 0     | 0      | 0     | 0     | 0     |
| Vegetables      | 0     | 0      | 0     | 0.01  | 0     |
| <b>Ethiopia</b> |       |        |       |       |       |
| Cereals         | 95.46 | 178.59 | 18.85 | 19.61 | 0     |
| Fiber           | 1.48  | 2.79   | 0.3   | 0.5   | 0     |
| Fruit           | 0.07  | 0.14   | 0.01  | 0.02  | 0     |
| Livestock       | 9.34  | 15.34  | 1.43  | 0.43  | 0     |
| Oil crops       | 3.86  | 6.75   | 0.67  | 1.04  | 0     |
| Pulses          | 4.42  | 6.71   | 0.56  | 0.68  | 0     |
| Roots & tubers  | 0.72  | 1.35   | 0.14  | 0.24  | 0     |
| Sugar crops     | 0.07  | 0.14   | 0.01  | 0.03  | 0     |
| Vegetables      | 0.1   | 0.19   | 0.02  | 0.03  | 0     |
| <b>Finland</b>  |       |        |       |       |       |
| Cereals         | 3.91  | 30.69  | 23.88 | 60.92 | 13.66 |
| Fiber           | 0     | 0      | 0     | 0     | 0     |
| Fruit           | 0     | 0      | 0     | 0     | 0     |
| Livestock       | 0.73  | 4.45   | 3.01  | 7.05  | 1.41  |
| Oil crops       | 0.18  | 1.39   | 1.07  | 2.73  | 0.62  |
| Pulses          | 0.01  | 0.08   | 0.06  | 0.15  | 0.03  |

|                |       |        |        |        |        |
|----------------|-------|--------|--------|--------|--------|
| Roots & tubers | 0.04  | 0.33   | 0.26   | 0.68   | 0.16   |
| Sugar crops    | 0.08  | 0.58   | 0.45   | 1.15   | 0.26   |
| Vegetables     | 0     | 0.02   | 0.02   | 0.04   | 0.01   |
| <b>France</b>  |       |        |        |        |        |
| Cereals        | 65.18 | 349.52 | 226.26 | 934.28 | 378.35 |
| Fiber          | 0     | 0      | 0      | 0      | 0      |
| Fruit          | 0.29  | 1.5    | 0.85   | 2.02   | 0.51   |
| Livestock      | 15.83 | 65.5   | 31.91  | 74.09  | 16.7   |
| Oil crops      | 9.13  | 44.23  | 26.43  | 125.95 | 56.26  |
| Pulses         | 1.93  | 8.64   | 4.62   | 14.79  | 5.11   |
| Roots & tubers | 0.14  | 1.93   | 1.92   | 7.77   | 2.84   |
| Sugar crops    | 0.41  | 7.07   | 7.57   | 47.21  | 22.4   |
| Vegetables     | 0.08  | 0.35   | 0.19   | 0.59   | 0.2    |
| <b>Gabon</b>   |       |        |        |        |        |
| Cereals        | 0.2   | 0.26   | 0.02   | 0      | 0      |
| Fiber          | 0     | 0      | 0      | 0      | 0      |
| Fruit          | 0.11  | 0.14   | 0.01   | 0      | 0      |
| Livestock      | 0.05  | 0.13   | 0.02   | 0      | 0      |
| Oil crops      | 0.04  | 0.06   | 0      | 0      | 0      |
| Pulses         | 0     | 0      | 0      | 0      | 0      |
| Roots & tubers | 0.42  | 0.57   | 0.04   | 0      | 0      |
| Sugar crops    | 0.01  | 0.01   | 0      | 0      | 0      |
| Vegetables     | 0     | 0      | 0      | 0      | 0      |
| <b>Gambia</b>  |       |        |        |        |        |
| Cereals        | 0.98  | 1.83   | 0.19   | 0      | 0      |
| Fiber          | 0.01  | 0.02   | 0      | 0      | 0      |
| Fruit          | 0     | 0      | 0      | 0      | 0      |
| Livestock      | 0.06  | 0.15   | 0.02   | 0      | 0      |
| Oil crops      | 0.07  | 0.12   | 0.01   | 0      | 0      |
| Pulses         | 0.01  | 0.02   | 0      | 0      | 0      |
| Roots & tubers | 0.01  | 0.01   | 0      | 0      | 0      |
| Sugar crops    | 0     | 0      | 0      | 0      | 0      |
| Vegetables     | 0     | 0      | 0      | 0      | 0      |
| <b>Georgia</b> |       |        |        |        |        |
| Cereals        | 1.1   | 5.8    | 2.15   | 1.11   | 0.19   |
| Fiber          | 0     | 0      | 0      | 0      | 0      |
| Fruit          | 0.01  | 0.1    | 0.04   | 0.02   | 0      |
| Livestock      | 0.57  | 2.79   | 1      | 0.51   | 0.09   |
| Oil crops      | 0.08  | 0.41   | 0.15   | 0.08   | 0.01   |
| Pulses         | 0.04  | 0.21   | 0.08   | 0.04   | 0.01   |
| Roots & tubers | 0.06  | 0.34   | 0.13   | 0.07   | 0.01   |
| Sugar crops    | 0     | 0      | 0      | 0      | 0      |
| Vegetables     | 0.02  | 0.11   | 0.04   | 0.02   | 0      |
| <b>Germany</b> |       |        |        |        |        |
| Cereals        | 56.14 | 297.91 | 183.02 | 631.38 | 230.65 |
| Fiber          | 0     | 0      | 0      | 0      | 0      |

|                  |       |       |       |        |       |
|------------------|-------|-------|-------|--------|-------|
| Fruit            | 0.18  | 0.58  | 0.16  | 0.27   | 0.07  |
| Livestock        | 8.75  | 47.51 | 29.6  | 110.21 | 42.93 |
| Oil crops        | 9.11  | 48.11 | 30.09 | 121.22 | 49.19 |
| Pulses           | 0.51  | 2.31  | 1.22  | 4.11   | 1.52  |
| Roots & tubers   | 0.77  | 4.59  | 3.05  | 11.36  | 4.38  |
| Sugar crops      | 1.74  | 13.83 | 10.36 | 29.38  | 8.54  |
| Vegetables       | 0.04  | 0.17  | 0.08  | 0.26   | 0.09  |
| <b>Ghana</b>     |       |       |       |        |       |
| Cereals          | 10.43 | 14.71 | 1.11  | 0      | 0     |
| Fiber            | 0.41  | 0.74  | 0.08  | 0      | 0     |
| Fruit            | 1.23  | 1.69  | 0.13  | 0      | 0     |
| Livestock        | 1     | 1.42  | 0.11  | 0      | 0     |
| Oil crops        | 0.6   | 1.09  | 0.11  | 0      | 0     |
| Pulses           | 1.76  | 2.12  | 0.11  | 0      | 0     |
| Roots & tubers   | 14.82 | 20.53 | 1.54  | 0      | 0     |
| Sugar crops      | 0.01  | 0.01  | 0     | 0      | 0     |
| Vegetables       | 0.13  | 0.21  | 0.02  | 0      | 0     |
| <b>Greece</b>    |       |       |       |        |       |
| Cereals          | 12.44 | 49.56 | 21.5  | 35.58  | 3.68  |
| Fiber            | 6.47  | 25.8  | 11.5  | 20.16  | 2.32  |
| Fruit            | 0.14  | 0.53  | 0.22  | 0.35   | 0.03  |
| Livestock        | 2.24  | 8.75  | 3.53  | 5.13   | 0.4   |
| Oil crops        | 0.57  | 2.19  | 0.88  | 1.36   | 0.13  |
| Pulses           | 0.07  | 0.25  | 0.09  | 0.14   | 0.01  |
| Roots & tubers   | 0.18  | 0.75  | 0.35  | 0.6    | 0.07  |
| Sugar crops      | 0.52  | 2     | 0.82  | 1.33   | 0.14  |
| Vegetables       | 0.31  | 1.16  | 0.45  | 0.72   | 0.07  |
| <b>Grenada</b>   |       |       |       |        |       |
| Cereals          | 0     | 0     | 0     | 0      | 0     |
| Fiber            | 0     | 0     | 0     | 0      | 0     |
| Fruit            | 0     | 0     | 0     | 0      | 0     |
| Livestock        | 0     | 0     | 0     | 0      | 0     |
| Oil crops        | 0     | 0     | 0     | 0      | 0     |
| Pulses           | 0     | 0     | 0     | 0      | 0     |
| Roots & tubers   | 0     | 0     | 0     | 0      | 0     |
| Sugar crops      | 0     | 0     | 0     | 0      | 0     |
| Vegetables       | 0     | 0     | 0     | 0      | 0     |
| <b>Guatemala</b> |       |       |       |        |       |
| Cereals          | 1.05  | 3.29  | 5.6   | 3.83   | 4.84  |
| Fiber            | 0.01  | 0.05  | 0.09  | 0.05   | 0.05  |
| Fruit            | 0.1   | 0.38  | 0.72  | 0.42   | 0.42  |
| Livestock        | 0.71  | 1.97  | 2.71  | 1.47   | 1.36  |
| Oil crops        | 0.25  | 0.91  | 1.71  | 0.98   | 1     |
| Pulses           | 0.22  | 0.68  | 1.12  | 0.72   | 0.84  |
| Roots & tubers   | 0.05  | 0.19  | 0.35  | 0.2    | 0.21  |
| Sugar crops      | 0.09  | 0.35  | 0.66  | 0.38   | 0.39  |

|                      |      |       |      |      |      |
|----------------------|------|-------|------|------|------|
| Vegetables           | 0.03 | 0.12  | 0.23 | 0.13 | 0.14 |
| <b>Guinea</b>        |      |       |      |      |      |
| Cereals              | 8.59 | 17.23 | 1.94 | 0.01 | 0    |
| Fiber                | 0.8  | 1.63  | 0.19 | 0    | 0    |
| Fruit                | 0.19 | 0.4   | 0.05 | 0    | 0    |
| Livestock            | 0.89 | 1.51  | 0.15 | 0    | 0    |
| Oil crops            | 0.09 | 0.16  | 0.02 | 0    | 0    |
| Pulses               | 0.12 | 0.42  | 0.06 | 0    | 0    |
| Roots & tubers       | 1.17 | 2.16  | 0.23 | 0    | 0    |
| Sugar crops          | 0.01 | 0.02  | 0    | 0    | 0    |
| Vegetables           | 0    | 0     | 0    | 0    | 0    |
| <b>Guinea-Bissau</b> |      |       |      |      |      |
| Cereals              | 1.2  | 1.45  | 0.08 | 0    | 0    |
| Fiber                | 0.14 | 0.17  | 0.01 | 0    | 0    |
| Fruit                | 0.02 | 0.03  | 0    | 0    | 0    |
| Livestock            | 0.23 | 0.28  | 0.02 | 0    | 0    |
| Oil crops            | 0.11 | 0.14  | 0.01 | 0    | 0    |
| Pulses               | 0.01 | 0.01  | 0    | 0    | 0    |
| Roots & tubers       | 0.05 | 0.06  | 0    | 0    | 0    |
| Sugar crops          | 0    | 0     | 0    | 0    | 0    |
| Vegetables           | 0    | 0     | 0    | 0    | 0    |
| <b>Guyana</b>        |      |       |      |      |      |
| Cereals              | 0    | 0.05  | 0.11 | 0.67 | 4.14 |
| Fiber                | 0    | 0     | 0    | 0    | 0    |
| Fruit                | 0    | 0     | 0    | 0    | 0.02 |
| Livestock            | 0    | 0.01  | 0.02 | 0.08 | 0.3  |
| Oil crops            | 0    | 0.02  | 0.03 | 0.1  | 0.32 |
| Pulses               | 0    | 0     | 0    | 0    | 0.01 |
| Roots & tubers       | 0    | 0     | 0    | 0.01 | 0.05 |
| Sugar crops          | 0    | 0.01  | 0.01 | 0.05 | 0.23 |
| Vegetables           | 0    | 0     | 0    | 0    | 0    |
| <b>Haiti</b>         |      |       |      |      |      |
| Cereals              | 0.96 | 2.16  | 1.91 | 0.81 | 0.35 |
| Fiber                | 0.01 | 0.03  | 0.03 | 0.01 | 0    |
| Fruit                | 0.08 | 0.19  | 0.17 | 0.07 | 0.03 |
| Livestock            | 0.44 | 0.95  | 0.73 | 0.31 | 0.14 |
| Oil crops            | 0.08 | 0.17  | 0.15 | 0.07 | 0.03 |
| Pulses               | 0.2  | 0.46  | 0.41 | 0.17 | 0.08 |
| Roots & tubers       | 0.33 | 0.74  | 0.66 | 0.28 | 0.12 |
| Sugar crops          | 0.02 | 0.04  | 0.03 | 0.01 | 0.01 |
| Vegetables           | 0    | 0.01  | 0    | 0    | 0    |
| <b>Honduras</b>      |      |       |      |      |      |
| Cereals              | 0.88 | 1.78  | 1.18 | 1.45 | 3.71 |
| Fiber                | 0.01 | 0.02  | 0.02 | 0.02 | 0.05 |
| Fruit                | 0.09 | 0.2   | 0.15 | 0.16 | 0.39 |
| Livestock            | 0.78 | 1.6   | 1.1  | 1.01 | 2.12 |

|                                   |        |         |       |        |       |
|-----------------------------------|--------|---------|-------|--------|-------|
| Oil crops                         | 0.02   | 0.05    | 0.04  | 0.04   | 0.1   |
| Pulses                            | 0.1    | 0.23    | 0.2   | 0.35   | 1.02  |
| Roots & tubers                    | 0.01   | 0.03    | 0.02  | 0.02   | 0.04  |
| Sugar crops                       | 0.05   | 0.1     | 0.08  | 0.1    | 0.24  |
| Vegetables                        | 0.03   | 0.06    | 0.04  | 0.04   | 0.11  |
| <b>Hungary</b>                    |        |         |       |        |       |
| Cereals                           | 25.78  | 101.4   | 43.52 | 116.53 | 38.18 |
| Fiber                             | 0      | 0       | 0     | 0      | 0     |
| Fruit                             | 0.03   | 0.14    | 0.07  | 0.19   | 0.07  |
| Livestock                         | 1.1    | 5.91    | 3.46  | 8.23   | 2.04  |
| Oil crops                         | 3.14   | 13.7    | 6.83  | 20.77  | 7.28  |
| Pulses                            | 0.1    | 0.5     | 0.27  | 0.73   | 0.23  |
| Roots & tubers                    | 0.12   | 0.45    | 0.17  | 0.42   | 0.13  |
| Sugar crops                       | 0.72   | 2.57    | 0.96  | 2.09   | 0.55  |
| Vegetables                        | 0.05   | 0.18    | 0.05  | 0.13   | 0.04  |
| <b>Iceland</b>                    |        |         |       |        |       |
| Cereals                           | 0      | 0       | 0     | 0      | 0     |
| Fiber                             | 0      | 0       | 0     | 0      | 0     |
| Fruit                             | 0      | 0       | 0     | 0      | 0     |
| Livestock                         | 0      | 0       | 0     | 0      | 0     |
| Oil crops                         | 0      | 0       | 0     | 0      | 0     |
| Pulses                            | 0      | 0       | 0     | 0      | 0     |
| Roots & tubers                    | 0      | 0       | 0     | 0      | 0     |
| Sugar crops                       | 0      | 0       | 0     | 0      | 0     |
| Vegetables                        | 0      | 0       | 0     | 0      | 0     |
| <b>India</b>                      |        |         |       |        |       |
| Cereals                           | 1684.6 | 2985.99 | 334.9 | 63.11  | 0     |
| Fiber                             | 160.42 | 473.8   | 65.45 | 12.37  | 0     |
| Fruit                             | 6.89   | 15.61   | 1.95  | 0.37   | 0     |
| Livestock                         | 152.18 | 337.98  | 41.9  | 8.05   | 0     |
| Oil crops                         | 278.38 | 613.12  | 75.79 | 14.53  | 0     |
| Pulses                            | 31.88  | 77.63   | 9.98  | 1.92   | 0     |
| Roots & tubers                    | 29.05  | 51.63   | 5.79  | 1.09   | 0     |
| Sugar crops                       | 7.15   | 18.96   | 2.54  | 0.48   | 0     |
| Vegetables                        | 11.36  | 18.56   | 1.94  | 0.38   | 0     |
| <b>Indonesia</b>                  |        |         |       |        |       |
| Cereals                           | 269.75 | 376.72  | 13.92 | 116.69 | 0     |
| Fiber                             | 0.09   | 0.16    | 0.01  | 0.08   | 0     |
| Fruit                             | 1.87   | 3.29    | 0.18  | 1.7    | 0     |
| Livestock                         | 20.02  | 29.58   | 1.2   | 2.44   | 0     |
| Oil crops                         | 42.99  | 67.03   | 3.01  | 26.85  | 0     |
| Pulses                            | 2.25   | 3.97    | 0.21  | 2.05   | 0     |
| Roots & tubers                    | 23.74  | 33.9    | 1.24  | 3.8    | 0     |
| Sugar crops                       | 0.74   | 1.3     | 0.07  | 0.68   | 0     |
| Vegetables                        | 0.58   | 1.02    | 0.05  | 0.53   | 0     |
| <b>Iran (Islamic Republic of)</b> |        |         |       |        |       |



|                |        |        |       |        |       |
|----------------|--------|--------|-------|--------|-------|
| Cereals        | 191.46 | 378.04 | 43.72 | 150.89 | 0     |
| Fiber          | 6.13   | 10.12  | 1.05  | 1.9    | 0     |
| Fruit          | 1.98   | 4.49   | 0.55  | 1.39   | 0     |
| Livestock      | 12.48  | 39.05  | 5.42  | 15.42  | 0     |
| Oil crops      | 2.93   | 20.16  | 3.29  | 2.9    | 0     |
| Pulses         | 1.43   | 3.2    | 0.4   | 1.16   | 0     |
| Roots & tubers | 2.02   | 4.07   | 0.47  | 2.92   | 0     |
| Sugar crops    | 1.85   | 8.26   | 1.25  | 4.46   | 0     |
| Vegetables     | 2.46   | 5.31   | 0.64  | 2.44   | 0     |
| <b>Iraq</b>    |        |        |       |        |       |
| Cereals        | 21.46  | 68.46  | 17.93 | 10.01  | 4.25  |
| Fiber          | 0.2    | 0.92   | 0.34  | 0.17   | 0.03  |
| Fruit          | 0.24   | 1.03   | 0.35  | 0.19   | 0.07  |
| Livestock      | 0.51   | 2.31   | 0.79  | 0.68   | 0.71  |
| Oil crops      | 0.07   | 0.29   | 0.1   | 0.05   | 0.01  |
| Pulses         | 0.03   | 0.09   | 0.03  | 0.01   | 0.01  |
| Roots & tubers | 0.15   | 0.8    | 0.29  | 0.2    | 0.15  |
| Sugar crops    | 0      | 0.02   | 0.01  | 0      | 0     |
| Vegetables     | 0.2    | 0.95   | 0.36  | 0.17   | 0.03  |
| <b>Ireland</b> |        |        |       |        |       |
| Cereals        | 2.19   | 14.25  | 10.15 | 31.53  | 9.88  |
| Fiber          | 0      | 0      | 0     | 0      | 0     |
| Fruit          | 0      | 0      | 0     | 0.01   | 0     |
| Livestock      | 3.44   | 14.83  | 7.3   | 16.38  | 3.75  |
| Oil crops      | 0.03   | 0.22   | 0.15  | 0.48   | 0.15  |
| Pulses         | 0.02   | 0.11   | 0.07  | 0.23   | 0.07  |
| Roots & tubers | 0.03   | 0.18   | 0.13  | 0.4    | 0.13  |
| Sugar crops    | 0.07   | 0.68   | 0.58  | 1.85   | 0.57  |
| Vegetables     | 0      | 0.01   | 0     | 0.01   | 0     |
| <b>Israel</b>  |        |        |       |        |       |
| Cereals        | 1.61   | 9.59   | 3.79  | 1.94   | 0.34  |
| Fiber          | 0.64   | 3.34   | 1.27  | 0.64   | 0.11  |
| Fruit          | 0.13   | 0.56   | 0.19  | 0.09   | 0.02  |
| Livestock      | 3.65   | 14.99  | 5.03  | 2.48   | 0.43  |
| Oil crops      | 0.12   | 0.55   | 0.2   | 0.1    | 0.02  |
| Pulses         | 0      | 0.02   | 0.01  | 0      | 0     |
| Roots & tubers | 0.32   | 1.49   | 0.54  | 0.27   | 0.05  |
| Sugar crops    | 0      | 0      | 0     | 0      | 0     |
| Vegetables     | 0.2    | 0.91   | 0.33  | 0.16   | 0.03  |
| <b>Italy</b>   |        |        |       |        |       |
| Cereals        | 18.06  | 114    | 78.83 | 234.41 | 70.99 |
| Fiber          | 0      | 0      | 0     | 0      | 0     |
| Fruit          | 0.26   | 1.54   | 1.02  | 3.41   | 1.21  |
| Livestock      | 5.55   | 35.9   | 24.61 | 49.82  | 6.59  |
| Oil crops      | 1.53   | 9.74   | 6.67  | 17.07  | 4.2   |
| Pulses         | 0.09   | 0.47   | 0.29  | 0.74   | 0.19  |

|                    |       |        |       |        |        |
|--------------------|-------|--------|-------|--------|--------|
| Roots & tubers     | 0.26  | 1.11   | 0.56  | 1.51   | 0.45   |
| Sugar crops        | 0.71  | 5.29   | 3.94  | 9.36   | 1.89   |
| Vegetables         | 0.52  | 2.84   | 1.76  | 4.59   | 1.21   |
| <b>Ivory Coast</b> |       |        |       |        |        |
| Cereals            | 0     | 0      | 0     | 0      | 0      |
| Fiber              | 0     | 0      | 0     | 0      | 0      |
| Fruit              | 0     | 0      | 0     | 0      | 0      |
| Livestock          | 0.33  | 1.41   | 0.22  | 0.1    | 0      |
| Oil crops          | 0     | 0      | 0     | 0      | 0      |
| Pulses             | 0     | 0      | 0     | 0      | 0      |
| Roots & tubers     | 0     | 0      | 0     | 0      | 0      |
| Sugar crops        | 0     | 0      | 0     | 0      | 0      |
| Vegetables         | 0     | 0      | 0     | 0      | 0      |
| <b>Jamaica</b>     |       |        |       |        |        |
| Cereals            | 0.01  | 0.01   | 0     | 0      | 0      |
| Fiber              | 0     | 0      | 0     | 0      | 0      |
| Fruit              | 0.06  | 0.1    | 0.01  | 0      | 0      |
| Livestock          | 0.62  | 1.06   | 0.16  | 0.07   | 0.03   |
| Oil crops          | 0.58  | 0.98   | 0.08  | 0.03   | 0.02   |
| Pulses             | 0.01  | 0.02   | 0     | 0      | 0      |
| Roots & tubers     | 0.12  | 0.21   | 0.02  | 0.01   | 0      |
| Sugar crops        | 0.06  | 0.1    | 0.01  | 0      | 0      |
| Vegetables         | 0.01  | 0.02   | 0     | 0      | 0      |
| <b>Japan</b>       |       |        |       |        |        |
| Cereals            | 50.49 | 66.9   | 26.71 | 17.07  | 0      |
| Fiber              | 0     | 0      | 0     | 0      | 0      |
| Fruit              | 0.14  | 0.2    | 0.08  | 0.06   | 0      |
| Livestock          | 43.06 | 36.02  | 11.31 | 14.65  | 0      |
| Oil crops          | 3.45  | 4.48   | 1.78  | 1.44   | 0      |
| Pulses             | 0.71  | 1.01   | 0.42  | 0.32   | 0      |
| Roots & tubers     | 3.2   | 3.3    | 1.19  | 0.87   | 0      |
| Sugar crops        | 3.32  | 4.63   | 1.88  | 1.46   | 0      |
| Vegetables         | 0.85  | 1.21   | 0.5   | 0.38   | 0      |
| <b>Jordan</b>      |       |        |       |        |        |
| Cereals            | 0.24  | 1.12   | 0.42  | 0.2    | 0.04   |
| Fiber              | 0     | 0      | 0     | 0      | 0      |
| Fruit              | 0.01  | 0.06   | 0.02  | 0.01   | 0      |
| Livestock          | 0.36  | 1.67   | 0.62  | 0.3    | 0.05   |
| Oil crops          | 0.03  | 0.13   | 0.05  | 0.02   | 0      |
| Pulses             | 0     | 0      | 0     | 0      | 0      |
| Roots & tubers     | 0.04  | 0.17   | 0.06  | 0.03   | 0.01   |
| Sugar crops        | 0     | 0      | 0     | 0      | 0      |
| Vegetables         | 0.11  | 0.49   | 0.18  | 0.09   | 0.02   |
| <b>Kazakhstan</b>  |       |        |       |        |        |
| Cereals            | 8.06  | 153.26 | 72.72 | 149.89 | 260.75 |
| Fiber              | 1.29  | 9.81   | 4.16  | 4.9    | 6.67   |

|                                         |       |       |      |      |       |
|-----------------------------------------|-------|-------|------|------|-------|
| Fruit                                   | 0.01  | 0.04  | 0.02 | 0.01 | 0     |
| Livestock                               | 2.32  | 16.58 | 6.95 | 6.52 | 7.36  |
| Oil crops                               | 0.37  | 5.24  | 2.43 | 2.65 | 3.31  |
| Pulses                                  | 0.04  | 0.43  | 0.19 | 0.3  | 0.47  |
| Roots & tubers                          | 0.2   | 1.97  | 0.87 | 0.98 | 1.27  |
| Sugar crops                             | 0.03  | 0.41  | 0.19 | 0.14 | 0.1   |
| Vegetables                              | 0.09  | 0.61  | 0.25 | 0.18 | 0.15  |
| <b>Kenya</b>                            |       |       |      |      |       |
| Cereals                                 | 14.95 | 31.18 | 3.59 | 13   | 0     |
| Fiber                                   | 0.31  | 0.66  | 0.08 | 0.31 | 0     |
| Fruit                                   | 0.34  | 0.74  | 0.09 | 0.32 | 0     |
| Livestock                               | 7.53  | 16.21 | 1.91 | 6.03 | 0     |
| Oil crops                               | 0.38  | 0.79  | 0.09 | 0.34 | 0     |
| Pulses                                  | 3.1   | 6.17  | 0.69 | 2.05 | 0     |
| Roots & tubers                          | 1.88  | 4.08  | 0.48 | 1.75 | 0     |
| Sugar crops                             | 0.11  | 0.25  | 0.03 | 0.11 | 0     |
| Vegetables                              | 0.22  | 0.49  | 0.06 | 0.22 | 0     |
| <b>Kuwait</b>                           |       |       |      |      |       |
| Cereals                                 | 0     | 0.05  | 0.02 | 0.01 | 0     |
| Fiber                                   | 0     | 0     | 0    | 0    | 0     |
| Fruit                                   | 0     | 0.04  | 0.02 | 0.01 | 0     |
| Livestock                               | 0     | 1.29  | 0.65 | 0.37 | 0.06  |
| Oil crops                               | 0     | 0     | 0    | 0    | 0     |
| Pulses                                  | 0     | 0     | 0    | 0    | 0     |
| Roots & tubers                          | 0     | 0.03  | 0.01 | 0.01 | 0     |
| Sugar crops                             | 0     | 0     | 0    | 0    | 0     |
| Vegetables                              | 0     | 0.06  | 0.03 | 0.02 | 0     |
| <b>Kyrgyzstan</b>                       |       |       |      |      |       |
| Cereals                                 | 3.35  | 17.06 | 6.13 | 8.31 | 12.32 |
| Fiber                                   | 0.42  | 2.52  | 0.96 | 1.15 | 1.57  |
| Fruit                                   | 0     | 0.02  | 0.01 | 0.01 | 0.01  |
| Livestock                               | 1.33  | 4.96  | 1.47 | 1.1  | 0.95  |
| Oil crops                               | 0.15  | 0.77  | 0.27 | 0.27 | 0.32  |
| Pulses                                  | 0.05  | 0.85  | 0.4  | 0.22 | 0.04  |
| Roots & tubers                          | 0.19  | 0.98  | 0.35 | 0.48 | 0.72  |
| Sugar crops                             | 0.04  | 0.21  | 0.08 | 0.11 | 0.17  |
| Vegetables                              | 0.03  | 0.16  | 0.06 | 0.08 | 0.11  |
| <b>Lao People's Democratic Republic</b> |       |       |      |      |       |
| Cereals                                 | 12.76 | 21.7  | 1.06 | 0.39 | 0     |
| Fiber                                   | 0.17  | 0.24  | 0.01 | 0    | 0     |
| Fruit                                   | 0.07  | 0.13  | 0.01 | 0    | 0     |
| Livestock                               | 0.82  | 1.43  | 0.07 | 0.03 | 0     |
| Oil crops                               | 0.44  | 0.64  | 0.02 | 0.01 | 0     |
| Pulses                                  | 0.08  | 0.14  | 0.01 | 0    | 0     |
| Roots & tubers                          | 0.3   | 0.45  | 0.02 | 0.01 | 0     |

|                |      |      |      |       |      |
|----------------|------|------|------|-------|------|
| Sugar crops    | 0.01 | 0.02 | 0    | 0     | 0    |
| Vegetables     | 0    | 0    | 0    | 0     | 0    |
| <b>Latvia</b>  |      |      |      |       |      |
| Cereals        | 0.85 | 7.04 | 5.42 | 23.17 | 9.79 |
| Fiber          | 0    | 0    | 0    | 0     | 0    |
| Fruit          | 0    | 0    | 0    | 0.01  | 0    |
| Livestock      | 0.12 | 0.91 | 0.68 | 2.4   | 0.88 |
| Oil crops      | 0.15 | 1.21 | 0.92 | 3.75  | 1.53 |
| Pulses         | 0    | 0.01 | 0.01 | 0.04  | 0.01 |
| Roots & tubers | 0.02 | 0.2  | 0.15 | 0.68  | 0.29 |
| Sugar crops    | 0.01 | 0.12 | 0.1  | 0.46  | 0.2  |
| Vegetables     | 0    | 0.01 | 0    | 0.02  | 0.01 |
| <b>Lebanon</b> |      |      |      |       |      |
| Cereals        | 0.61 | 2.8  | 0.99 | 1     | 1.26 |
| Fiber          | 0    | 0    | 0    | 0     | 0    |
| Fruit          | 0.03 | 0.14 | 0.04 | 0.05  | 0.07 |
| Livestock      | 0.29 | 1.42 | 0.52 | 0.85  | 1.4  |
| Oil crops      | 0.02 | 0.11 | 0.04 | 0.02  | 0.01 |
| Pulses         | 0.01 | 0.04 | 0.01 | 0.02  | 0.02 |
| Roots & tubers | 0.03 | 0.29 | 0.13 | 0.22  | 0.36 |
| Sugar crops    | 0.01 | 0.05 | 0.02 | 0.02  | 0.03 |
| Vegetables     | 0.04 | 0.21 | 0.08 | 0.08  | 0.11 |
| <b>Lesotho</b> |      |      |      |       |      |
| Cereals        | 0.46 | 1.08 | 0.13 | 0     | 0    |
| Fiber          | 0    | 0    | 0    | 0     | 0    |
| Fruit          | 0    | 0    | 0    | 0     | 0    |
| Livestock      | 0.25 | 0.53 | 0.06 | 0     | 0    |
| Oil crops      | 0    | 0    | 0    | 0     | 0    |
| Pulses         | 0.04 | 0.08 | 0.01 | 0     | 0    |
| Roots & tubers | 0.05 | 0.14 | 0.02 | 0     | 0    |
| Sugar crops    | 0    | 0    | 0    | 0     | 0    |
| Vegetables     | 0    | 0    | 0    | 0     | 0    |
| <b>Liberia</b> |      |      |      |       |      |
| Cereals        | 0.57 | 1.28 | 0.15 | 0     | 0    |
| Fiber          | 0    | 0    | 0    | 0     | 0    |
| Fruit          | 0.04 | 0.11 | 0.01 | 0     | 0    |
| Livestock      | 0.06 | 0.2  | 0.03 | 0     | 0    |
| Oil crops      | 0.05 | 0.14 | 0.02 | 0     | 0    |
| Pulses         | 0.01 | 0.02 | 0    | 0     | 0    |
| Roots & tubers | 0.43 | 1.02 | 0.13 | 0     | 0    |
| Sugar crops    | 0.01 | 0.02 | 0    | 0     | 0    |
| Vegetables     | 0    | 0    | 0    | 0     | 0    |
| <b>Libya</b>   |      |      |      |       |      |
| Cereals        | 0.64 | 2.8  | 0.91 | 1.27  | 1.92 |
| Fiber          | 0    | 0    | 0    | 0     | 0    |
| Fruit          | 0.05 | 0.24 | 0.08 | 0.11  | 0.17 |

|                   |       |       |       |       |       |
|-------------------|-------|-------|-------|-------|-------|
| Livestock         | 0.23  | 1.78  | 0.75  | 0.63  | 0.62  |
| Oil crops         | 0.03  | 0.12  | 0.04  | 0.05  | 0.08  |
| Pulses            | 0.02  | 0.08  | 0.03  | 0.04  | 0.06  |
| Roots & tubers    | 0.05  | 0.22  | 0.07  | 0.1   | 0.16  |
| Sugar crops       | 0     | 0     | 0     | 0     | 0     |
| Vegetables        | 0.05  | 0.21  | 0.07  | 0.1   | 0.15  |
| <b>Lithuania</b>  |       |       |       |       |       |
| Cereals           | 3.47  | 18.01 | 10.95 | 36.59 | 12.92 |
| Fiber             | 0     | 0     | 0     | 0     | 0     |
| Fruit             | 0     | 0.01  | 0     | 0.01  | 0     |
| Livestock         | 0.46  | 2.37  | 1.43  | 5.42  | 2.15  |
| Oil crops         | 0.42  | 2.33  | 1.48  | 5.06  | 1.84  |
| Pulses            | 0.08  | 0.3   | 0.13  | 0.36  | 0.12  |
| Roots & tubers    | 0.08  | 0.35  | 0.19  | 0.59  | 0.2   |
| Sugar crops       | 0.03  | 0.34  | 0.29  | 1.05  | 0.36  |
| Vegetables        | 0     | 0.01  | 0     | 0.01  | 0     |
| <b>Luxembourg</b> |       |       |       |       |       |
| Cereals           | 0     | 0.78  | 0.99  | 2.65  | 0.42  |
| Fiber             | 0     | 0     | 0     | 0     | 0     |
| Fruit             | 0     | 0     | 0     | 0.01  | 0     |
| Livestock         | 0     | 0.24  | 0.31  | 0.83  | 0.13  |
| Oil crops         | 0     | 0.13  | 0.16  | 0.44  | 0.07  |
| Pulses            | 0     | 0.01  | 0.01  | 0.02  | 0     |
| Roots & tubers    | 0     | 0.01  | 0.01  | 0.02  | 0     |
| Sugar crops       | 0     | 0     | 0     | 0     | 0     |
| Vegetables        | 0     | 0     | 0     | 0     | 0     |
| <b>Madagascar</b> |       |       |       |       |       |
| Cereals           | 19.39 | 23.47 | 1.37  | 0     | 0     |
| Fiber             | 0.34  | 0.42  | 0.02  | 0     | 0     |
| Fruit             | 0.17  | 0.21  | 0.01  | 0     | 0     |
| Livestock         | 3.55  | 4.32  | 0.25  | 0     | 0     |
| Oil crops         | 0.21  | 0.26  | 0.02  | 0     | 0     |
| Pulses            | 1.24  | 1.5   | 0.08  | 0     | 0     |
| Roots & tubers    | 4.78  | 5.78  | 0.33  | 0     | 0     |
| Sugar crops       | 0.08  | 0.16  | 0.02  | 0     | 0     |
| Vegetables        | 0.03  | 0.03  | 0     | 0     | 0     |
| <b>Malawi</b>     |       |       |       |       |       |
| Cereals           | 12.78 | 18.9  | 1.66  | 1.84  | 0     |
| Fiber             | 1.26  | 1.93  | 0.17  | 0.09  | 0     |
| Fruit             | 0.23  | 0.37  | 0.04  | 0.02  | 0     |
| Livestock         | 0.83  | 1.03  | 0.06  | 0.12  | 0     |
| Oil crops         | 1.24  | 1.51  | 0.08  | 0     | 0     |
| Pulses            | 1.43  | 2     | 0.16  | 0.08  | 0     |
| Roots & tubers    | 4.86  | 6.87  | 0.56  | 0.4   | 0     |
| Sugar crops       | 0.09  | 0.14  | 0.01  | 0.01  | 0     |
| Vegetables        | 0.05  | 0.08  | 0.01  | 0     | 0     |

|                   |       |        |        |       |        |
|-------------------|-------|--------|--------|-------|--------|
| <b>Malaysia</b>   |       |        |        |       |        |
| Cereals           | 1.61  | 11.26  | 1.28   | 11.7  | 0      |
| Fiber             | 0     | 0      | 0      | 0     | 0      |
| Fruit             | 0.13  | 0.29   | 0.02   | 0.13  | 0      |
| Livestock         | 2.69  | 9.15   | 0.79   | 4.45  | 0      |
| Oil crops         | 0.71  | 1.56   | 0.11   | 0.7   | 0      |
| Pulses            | 0     | 0      | 0      | 0     | 0      |
| Roots & tubers    | 0.05  | 0.13   | 0.01   | 0.04  | 0      |
| Sugar crops       | 0.01  | 0.02   | 0      | 0.01  | 0      |
| Vegetables        | 0.02  | 0.03   | 0      | 0.02  | 0      |
| <b>Mali</b>       |       |        |        |       |        |
| Cereals           | 17.62 | 32.17  | 3.37   | 0.01  | 0      |
| Fiber             | 7.99  | 14.73  | 1.55   | 0.01  | 0      |
| Fruit             | 0.04  | 0.07   | 0.01   | 0     | 0      |
| Livestock         | 3.52  | 7.11   | 0.81   | 0     | 0      |
| Oil crops         | 0.16  | 0.26   | 0.03   | 0     | 0      |
| Pulses            | 0     | 0      | 0      | 0     | 0      |
| Roots & tubers    | 0.3   | 0.65   | 0.08   | 0     | 0      |
| Sugar crops       | 0.01  | 0.02   | 0      | 0     | 0      |
| Vegetables        | 0.06  | 0.14   | 0.02   | 0     | 0      |
| <b>Mauritania</b> |       |        |        |       |        |
| Cereals           | 0.89  | 1.46   | 0.13   | 0     | 0      |
| Fiber             | 0     | 0      | 0      | 0     | 0      |
| Fruit             | 0.03  | 0.05   | 0.01   | 0     | 0      |
| Livestock         | 1.43  | 2.19   | 0.18   | 0     | 0      |
| Oil crops         | 0     | 0      | 0      | 0     | 0      |
| Pulses            | 0.19  | 0.29   | 0.02   | 0     | 0      |
| Roots & tubers    | 0.01  | 0.01   | 0      | 0     | 0      |
| Sugar crops       | 0     | 0      | 0      | 0     | 0      |
| Vegetables        | 0     | 0      | 0      | 0     | 0      |
| <b>Mauritius</b>  |       |        |        |       |        |
| Cereals           | 0     | 0      | 0      | 0     | 0      |
| Fiber             | 0     | 0      | 0      | 0     | 0      |
| Fruit             | 0     | 0      | 0      | 0     | 0      |
| Livestock         | 0     | 0      | 0      | 0     | 0      |
| Oil crops         | 0     | 0      | 0      | 0     | 0      |
| Pulses            | 0     | 0      | 0      | 0     | 0      |
| Roots & tubers    | 0     | 0      | 0      | 0     | 0      |
| Sugar crops       | 0     | 0      | 0      | 0     | 0      |
| Vegetables        | 0     | 0      | 0      | 0     | 0      |
| <b>Mexico</b>     |       |        |        |       |        |
| Cereals           | 66.98 | 147.09 | 129.65 | 90.57 | 131.34 |
| Fiber             | 0.01  | 0.43   | 1.61   | 5.22  | 17.29  |
| Fruit             | 0.55  | 1.28   | 1.3    | 0.83  | 1.14   |
| Livestock         | 15.74 | 37.98  | 41.47  | 26.02 | 33.16  |
| Oil crops         | 2.72  | 5.39   | 3.07   | 1.64  | 1.73   |

|                   |        |       |       |       |       |
|-------------------|--------|-------|-------|-------|-------|
| Pulses            | 5.85   | 10.95 | 4.6   | 2.94  | 4.09  |
| Roots & tubers    | 0.35   | 0.86  | 0.97  | 0.66  | 0.9   |
| Sugar crops       | 0.58   | 1.4   | 1.5   | 0.82  | 0.85  |
| Vegetables        | 0.5    | 1.22  | 1.41  | 1.21  | 2.19  |
| <b>Mongolia</b>   |        |       |       |       |       |
| Cereals           | 0.7    | 0.98  | 0.39  | 2.43  | 0     |
| Fiber             | 0      | 0     | 0     | 0     | 0     |
| Fruit             | 0      | 0     | 0     | 0     | 0     |
| Livestock         | 1.88   | 1.87  | 0.63  | 2.15  | 0     |
| Oil crops         | 0.01   | 0.24  | 0.13  | 0.07  | 0     |
| Pulses            | 0      | 0     | 0     | 0.01  | 0     |
| Roots & tubers    | 0.03   | 0.05  | 0.02  | 0.12  | 0     |
| Sugar crops       | 0      | 0     | 0     | 0     | 0     |
| Vegetables        | 0      | 0     | 0     | 0     | 0     |
| <b>Montenegro</b> |        |       |       |       |       |
| Cereals           | 0.04   | 0.14  | 0.04  | 0.05  | 0     |
| Fiber             | 0      | 0     | 0     | 0     | 0     |
| Fruit             | 0      | 0.02  | 0     | 0.01  | 0     |
| Livestock         | 2.61   | 9.28  | 3.07  | 3.65  | 0.17  |
| Oil crops         | 0      | 0     | 0     | 0     | 0     |
| Pulses            | 0.01   | 0.04  | 0.01  | 0.01  | 0     |
| Roots & tubers    | 0.04   | 0.13  | 0.04  | 0.05  | 0     |
| Sugar crops       | 0      | 0     | 0     | 0     | 0     |
| Vegetables        | 0.01   | 0.02  | 0.01  | 0.01  | 0     |
| <b>Morocco</b>    |        |       |       |       |       |
| Cereals           | 24.41  | 87.92 | 25.76 | 25.88 | 32.09 |
| Fiber             | 0      | 0.01  | 0     | 0     | 0     |
| Fruit             | 0.16   | 0.54  | 0.15  | 0.15  | 0.17  |
| Livestock         | 3.65   | 11.56 | 3.01  | 2.09  | 1.66  |
| Oil crops         | 0.31   | 1     | 0.27  | 0.25  | 0.29  |
| Pulses            | 0.15   | 0.54  | 0.16  | 0.13  | 0.13  |
| Roots & tubers    | 0.47   | 1.58  | 0.43  | 0.38  | 0.41  |
| Sugar crops       | 1      | 3.46  | 1     | 0.96  | 1.16  |
| Vegetables        | 0.45   | 1.51  | 0.42  | 0.34  | 0.35  |
| <b>Mozambique</b> |        |       |       |       |       |
| Cereals           | 5.13   | 13.97 | 1.89  | 1.81  | 0     |
| Fiber             | 1.09   | 1.7   | 0.15  | 6.1   | 0     |
| Fruit             | 0.04   | 0.11  | 0.02  | 0.03  | 0     |
| Livestock         | 1.06   | 2.32  | 0.28  | 0     | 0     |
| Oil crops         | 0.96   | 2.03  | 0.24  | 0.7   | 0     |
| Pulses            | 1.63   | 2.84  | 0.29  | 0.27  | 0     |
| Roots & tubers    | 4.21   | 10.39 | 1.3   | 0.27  | 0     |
| Sugar crops       | 0.04   | 0.15  | 0.02  | 0     | 0     |
| Vegetables        | 0.07   | 0.13  | 0.01  | 0.04  | 0     |
| <b>Myanmar</b>    |        |       |       |       |       |
| Cereals           | 119.33 | 218.8 | 12.09 | 4.66  | 0     |

|                    |       |       |       |       |       |
|--------------------|-------|-------|-------|-------|-------|
| Fiber              | 3.81  | 6.42  | 0.31  | 0.74  | 0     |
| Fruit              | 0.22  | 0.37  | 0.02  | 0.01  | 0     |
| Livestock          | 8.41  | 13.49 | 0.6   | 0.92  | 0     |
| Oil crops          | 27.01 | 45.54 | 2.12  | 0.76  | 0     |
| Pulses             | 24.36 | 40.86 | 1.93  | 0.69  | 0     |
| Roots & tubers     | 0.65  | 1.1   | 0.05  | 0.02  | 0     |
| Sugar crops        | 0.31  | 0.49  | 0.02  | 0.01  | 0     |
| Vegetables         | 0.5   | 0.83  | 0.04  | 0.01  | 0     |
| <b>Namibia</b>     |       |       |       |       |       |
| Cereals            | 0.49  | 1.61  | 0.24  | 0.21  | 0     |
| Fiber              | 0     | 0     | 0     | 0     | 0     |
| Fruit              | 0     | 0.01  | 0     | 0     | 0     |
| Livestock          | 0.69  | 1.17  | 0.12  | 0.35  | 0     |
| Oil crops          | 0     | 0     | 0     | 0     | 0     |
| Pulses             | 0.02  | 0.08  | 0.01  | 0.05  | 0     |
| Roots & tubers     | 0     | 0     | 0     | 0     | 0     |
| Sugar crops        | 0     | 0     | 0     | 0     | 0     |
| Vegetables         | 0     | 0.01  | 0     | 0     | 0     |
| <b>Nepal</b>       |       |       |       |       |       |
| Cereals            | 42.97 | 80.88 | 9.21  | 1.79  | 0     |
| Fiber              | 0     | 0     | 0     | 0     | 0     |
| Fruit              | 0.03  | 0.05  | 0     | 0     | 0     |
| Livestock          | 4.54  | 8.18  | 0.91  | 0.18  | 0     |
| Oil crops          | 0.32  | 0.6   | 0.07  | 0.01  | 0     |
| Pulses             | 0.32  | 0.55  | 0.06  | 0.01  | 0     |
| Roots & tubers     | 1.34  | 2.44  | 0.27  | 0.05  | 0     |
| Sugar crops        | 0.08  | 0.15  | 0.02  | 0     | 0     |
| Vegetables         | 0     | 0     | 0     | 0     | 0     |
| <b>Netherlands</b> |       |       |       |       |       |
| Cereals            | 1.54  | 9.08  | 5.94  | 28.61 | 13.13 |
| Fiber              | 0     | 0     | 0     | 0     | 0     |
| Fruit              | 0     | 0.02  | 0.01  | 0.06  | 0.03  |
| Livestock          | 3.23  | 21.89 | 15.36 | 38.34 | 9.11  |
| Oil crops          | 0     | 0.04  | 0.04  | 0.29  | 0.14  |
| Pulses             | 0.01  | 0.05  | 0.03  | 0.14  | 0.06  |
| Roots & tubers     | 0.23  | 1.73  | 1.34  | 7.53  | 3.59  |
| Sugar crops        | 0.41  | 2.35  | 1.52  | 7.44  | 3.43  |
| Vegetables         | 0.08  | 0.45  | 0.29  | 1.26  | 0.55  |
| <b>New Zealand</b> |       |       |       |       |       |
| Cereals            | 0.02  | 0.52  | 0.8   | 4.01  | 20.42 |
| Fiber              | 0     | 0     | 0     | 0     | 0     |
| Fruit              | 0     | 0.01  | 0.01  | 0.04  | 0.22  |
| Livestock          | 0.11  | 3.11  | 4.48  | 19.47 | 73.73 |
| Oil crops          | 0     | 0     | 0     | 0.02  | 0.11  |
| Pulses             | 0     | 0.02  | 0.03  | 0.17  | 0.86  |
| Roots & tubers     | 0     | 0.02  | 0.03  | 0.17  | 0.88  |



|                  |        |       |       |       |      |
|------------------|--------|-------|-------|-------|------|
| Sugar crops      | 0      | 0     | 0     | 0     | 0    |
| Vegetables       | 0      | 0     | 0     | 0.02  | 0.12 |
| <b>Nicaragua</b> |        |       |       |       |      |
| Cereals          | 1.76   | 3.73  | 2.92  | 1.74  | 1.87 |
| Fiber            | 0.03   | 0.06  | 0.05  | 0.03  | 0.03 |
| Fruit            | 0.02   | 0.05  | 0.04  | 0.02  | 0.03 |
| Livestock        | 0.7    | 1.59  | 1.55  | 1.02  | 1.24 |
| Oil crops        | 0.09   | 0.2   | 0.16  | 0.09  | 0.1  |
| Pulses           | 1.12   | 2.09  | 0.87  | 0.46  | 0.42 |
| Roots & tubers   | 0.06   | 0.12  | 0.1   | 0.06  | 0.06 |
| Sugar crops      | 0.06   | 0.13  | 0.1   | 0.06  | 0.07 |
| Vegetables       | 0      | 0.01  | 0.01  | 0     | 0    |
| <b>Niger</b>     |        |       |       |       |      |
| Cereals          | 23.03  | 31.93 | 2.42  | 7.08  | 0    |
| Fiber            | 0.27   | 0.36  | 0.03  | 0     | 0    |
| Fruit            | 0.01   | 0.02  | 0     | 0.01  | 0    |
| Livestock        | 4.77   | 6.38  | 0.45  | 0.42  | 0    |
| Oil crops        | 1.27   | 1.75  | 0.13  | 0.28  | 0    |
| Pulses           | 0.17   | 0.23  | 0.02  | 0.03  | 0    |
| Roots & tubers   | 0.23   | 0.32  | 0.02  | 0.06  | 0    |
| Sugar crops      | 0.01   | 0.01  | 0     | 0     | 0    |
| Vegetables       | 0.26   | 0.35  | 0.03  | 0.06  | 0    |
| <b>Nigeria</b>   |        |       |       |       |      |
| Cereals          | 141.52 | 245.5 | 24.22 | 7.93  | 0    |
| Fiber            | 9.93   | 18.76 | 2     | 0.01  | 0    |
| Fruit            | 0.87   | 1.75  | 0.2   | 0.27  | 0    |
| Livestock        | 11.17  | 19.38 | 1.95  | 4.54  | 0    |
| Oil crops        | 11.86  | 21.94 | 2.29  | 1.89  | 0    |
| Pulses           | 0.24   | 0.42  | 0.04  | 0     | 0    |
| Roots & tubers   | 56.61  | 115.4 | 13.01 | 17.68 | 0    |
| Sugar crops      | 0.05   | 0.06  | 0     | 0     | 0    |
| Vegetables       | 1.83   | 2.63  | 0.21  | 0.17  | 0    |
| <b>Norway</b>    |        |       |       |       |      |
| Cereals          | 1.74   | 12.83 | 9.11  | 17.01 | 1.71 |
| Fiber            | 0      | 0     | 0     | 0     | 0    |
| Fruit            | 0      | 0     | 0     | 0     | 0    |
| Livestock        | 0.25   | 2.88  | 2.65  | 6.03  | 0.82 |
| Oil crops        | 0.02   | 0.15  | 0.11  | 0.2   | 0.02 |
| Pulses           | 0      | 0     | 0     | 0     | 0    |
| Roots & tubers   | 0.03   | 0.22  | 0.16  | 0.3   | 0.03 |
| Sugar crops      | 0      | 0     | 0     | 0     | 0    |
| Vegetables       | 0      | 0.01  | 0     | 0.01  | 0    |
| <b>Oman</b>      |        |       |       |       |      |
| Cereals          | 0.03   | 0.14  | 0.05  | 0.02  | 0    |
| Fiber            | 0      | 0     | 0     | 0     | 0    |
| Fruit            | 0.13   | 0.59  | 0.22  | 0.11  | 0.02 |

|                         |        |        |       |       |        |
|-------------------------|--------|--------|-------|-------|--------|
| Livestock               | 0.1    | 0.46   | 0.17  | 0.08  | 0.01   |
| Oil crops               | 0      | 0      | 0     | 0     | 0      |
| Pulses                  | 0      | 0      | 0     | 0     | 0      |
| Roots & tubers          | 0      | 0.01   | 0     | 0     | 0      |
| Sugar crops             | 0      | 0      | 0     | 0     | 0      |
| Vegetables              | 0.01   | 0.04   | 0.01  | 0.01  | 0      |
| <b>Pakistan</b>         |        |        |       |       |        |
| Cereals                 | 286.35 | 674.99 | 85.5  | 16.48 | 0      |
| Fiber                   | 92.75  | 241.1  | 31.5  | 6.11  | 0      |
| Fruit                   | 0.83   | 1.96   | 0.25  | 0.05  | 0      |
| Livestock               | 61.37  | 106.32 | 11.66 | 2.23  | 0      |
| Oil crops               | 8.15   | 18.74  | 2.36  | 0.45  | 0      |
| Pulses                  | 2.03   | 4.64   | 0.58  | 0.11  | 0      |
| Roots & tubers          | 1.3    | 2.79   | 0.34  | 0.07  | 0      |
| Sugar crops             | 1.37   | 3.29   | 0.42  | 0.08  | 0      |
| Vegetables              | 0.93   | 2.31   | 0.3   | 0.06  | 0      |
| <b>Panama</b>           |        |        |       |       |        |
| Cereals                 | 0.55   | 1.27   | 1.23  | 0.55  | 0.32   |
| Fiber                   | 0      | 0      | 0     | 0     | 0      |
| Fruit                   | 0.07   | 0.18   | 0.22  | 0.1   | 0.07   |
| Livestock               | 0.6    | 1.39   | 1.32  | 0.59  | 0.34   |
| Oil crops               | 0.01   | 0.03   | 0.04  | 0.02  | 0.01   |
| Pulses                  | 0.02   | 0.04   | 0.05  | 0.03  | 0.02   |
| Roots & tubers          | 0.02   | 0.05   | 0.06  | 0.03  | 0.02   |
| Sugar crops             | 0.01   | 0.04   | 0.07  | 0.03  | 0.01   |
| Vegetables              | 0.01   | 0.02   | 0.02  | 0.01  | 0.01   |
| <b>Papua New Guinea</b> |        |        |       |       |        |
| Cereals                 | 0.07   | 0.08   | 0.03  | 0.01  | 0      |
| Fiber                   | 0      | 0      | 0     | 0     | 0      |
| Fruit                   | 0.27   | 0.39   | 0.15  | 0.08  | 0      |
| Livestock               | 0.61   | 0.49   | 0.13  | 0.06  | 0      |
| Oil crops               | 1.56   | 2.28   | 0.88  | 0.48  | 0      |
| Pulses                  | 0.01   | 0.01   | 0     | 0     | 0      |
| Roots & tubers          | 0.67   | 0.95   | 0.36  | 0.2   | 0      |
| Sugar crops             | 0.01   | 0.01   | 0.01  | 0     | 0      |
| Vegetables              | 0      | 0      | 0     | 0     | 0      |
| <b>Paraguay</b>         |        |        |       |       |        |
| Cereals                 | 0.14   | 2.5    | 2.78  | 7.85  | 41.28  |
| Fiber                   | 0.07   | 1.08   | 1.08  | 1.96  | 5.47   |
| Fruit                   | 0      | 0.01   | 0.02  | 0.04  | 0.18   |
| Livestock               | 0.1    | 1.54   | 1.53  | 2.8   | 8.26   |
| Oil crops               | 0.16   | 3.76   | 6.01  | 29.87 | 194.96 |
| Pulses                  | 0.02   | 0.29   | 0.28  | 0.43  | 0.97   |
| Roots & tubers          | 0.03   | 0.52   | 0.64  | 2.08  | 10.73  |
| Sugar crops             | 0      | 0.03   | 0.04  | 0.09  | 0.21   |
| Vegetables              | 0      | 0.01   | 0.02  | 0.04  | 0.1    |

|                    |       |        |       |        |       |
|--------------------|-------|--------|-------|--------|-------|
| <b>Peru</b>        |       |        |       |        |       |
| Cereals            | 0.8   | 12.36  | 11.37 | 14.48  | 18.37 |
| Fiber              | 0.18  | 2.74   | 2.53  | 3.23   | 4.04  |
| Fruit              | 0.03  | 0.44   | 0.41  | 0.54   | 0.7   |
| Livestock          | 0.34  | 5.2    | 4.7   | 5.51   | 5.81  |
| Oil crops          | 0.01  | 0.08   | 0.07  | 0.09   | 0.12  |
| Pulses             | 0.06  | 0.91   | 0.83  | 0.96   | 0.85  |
| Roots & tubers     | 0.13  | 2.08   | 1.95  | 2.68   | 3.9   |
| Sugar crops        | 0.01  | 0.15   | 0.14  | 0.19   | 0.25  |
| Vegetables         | 0.02  | 0.28   | 0.25  | 0.29   | 0.29  |
| <b>Philippines</b> |       |        |       |        |       |
| Cereals            | 44.8  | 115.64 | 9.2   | 82.53  | 0     |
| Fiber              | 0.04  | 0.09   | 0.01  | 0.04   | 0     |
| Fruit              | 1.53  | 3.94   | 0.31  | 1.98   | 0     |
| Livestock          | 11.8  | 27.49  | 1.89  | 3.1    | 0     |
| Oil crops          | 16.76 | 43.26  | 3.39  | 21.74  | 0     |
| Pulses             | 0.2   | 0.5    | 0.04  | 0.25   | 0     |
| Roots & tubers     | 1.46  | 4.01   | 0.32  | 0.75   | 0     |
| Sugar crops        | 0.77  | 2.02   | 0.15  | 0.22   | 0     |
| Vegetables         | 0.09  | 0.22   | 0.02  | 0.11   | 0     |
| <b>Poland</b>      |       |        |       |        |       |
| Cereals            | 37.57 | 151.05 | 69.57 | 238.27 | 92.36 |
| Fiber              | 0     | 0      | 0     | 0      | 0     |
| Fruit              | 0.06  | 0.21   | 0.08  | 0.23   | 0.08  |
| Livestock          | 8.66  | 32.48  | 13.34 | 36.48  | 12.03 |
| Oil crops          | 1.72  | 11.42  | 8.55  | 43.87  | 19.89 |
| Pulses             | 0.29  | 1.07   | 0.43  | 1.15   | 0.38  |
| Roots & tubers     | 2.67  | 9.08   | 2.98  | 6.15   | 1.69  |
| Sugar crops        | 1.44  | 6.74   | 3.79  | 14.59  | 5.83  |
| Vegetables         | 0.18  | 0.67   | 0.26  | 0.71   | 0.24  |
| <b>Portugal</b>    |       |        |       |        |       |
| Cereals            | 1.17  | 4.68   | 2.13  | 8.67   | 3.79  |
| Fiber              | 0     | 0      | 0     | 0      | 0     |
| Fruit              | 0.11  | 0.35   | 0.11  | 0.23   | 0.07  |
| Livestock          | 2.3   | 7.93   | 2.71  | 6.04   | 1.78  |
| Oil crops          | 0.03  | 0.11   | 0.06  | 0.32   | 0.16  |
| Pulses             | 0.01  | 0.02   | 0.01  | 0.04   | 0.02  |
| Roots & tubers     | 0.18  | 0.64   | 0.21  | 0.3    | 0.04  |
| Sugar crops        | 0.02  | 0.14   | 0.12  | 0.55   | 0.22  |
| Vegetables         | 0.12  | 0.45   | 0.19  | 0.77   | 0.35  |
| <b>Qatar</b>       |       |        |       |        |       |
| Cereals            | 0     | 0      | 0     | 0      | 0     |
| Fiber              | 0     | 0      | 0     | 0      | 0     |
| Fruit              | 0     | 0      | 0     | 0      | 0     |
| Livestock          | 0.05  | 0.23   | 0.09  | 0.04   | 0.01  |
| Oil crops          | 0     | 0      | 0     | 0      | 0     |

|                           |        |        |        |         |        |
|---------------------------|--------|--------|--------|---------|--------|
| Pulses                    | 0      | 0      | 0      | 0       | 0      |
| Roots & tubers            | 0      | 0      | 0      | 0       | 0      |
| Sugar crops               | 0      | 0      | 0      | 0       | 0      |
| Vegetables                | 0      | 0      | 0      | 0       | 0      |
| <b>Republic of Korea</b>  |        |        |        |         |        |
| Cereals                   | 31.2   | 42.92  | 1.32   | 0.37    | 0      |
| Fiber                     | 0      | 0      | 0      | 0       | 0      |
| Fruit                     | 0.16   | 0.21   | 0.01   | 0       | 0      |
| Livestock                 | 17.01  | 23.18  | 0.7    | 0.19    | 0      |
| Oil crops                 | 3.74   | 4.99   | 0.14   | 0.04    | 0      |
| Pulses                    | 0.11   | 0.15   | 0      | 0       | 0      |
| Roots & tubers            | 0.91   | 1.23   | 0.04   | 0.01    | 0      |
| Sugar crops               | 0      | 0      | 0      | 0       | 0      |
| Vegetables                | 0.94   | 1.3    | 0.04   | 0.01    | 0      |
| <b>Romania</b>            |        |        |        |         |        |
| Cereals                   | 16.94  | 76.84  | 42.78  | 164.18  | 64.57  |
| Fiber                     | 0      | 0      | 0      | 0       | 0      |
| Fruit                     | 0.02   | 0.12   | 0.07   | 0.35    | 0.15   |
| Livestock                 | 2.93   | 11.88  | 5.52   | 17.64   | 6.45   |
| Oil crops                 | 1.86   | 9.62   | 6.11   | 26.29   | 10.94  |
| Pulses                    | 0.14   | 0.58   | 0.26   | 0.71    | 0.23   |
| Roots & tubers            | 0.68   | 2.75   | 1.24   | 2.89    | 0.76   |
| Sugar crops               | 0.19   | 0.71   | 0.29   | 0.86    | 0.32   |
| Vegetables                | 0.09   | 0.38   | 0.19   | 0.7     | 0.27   |
| <b>Russian Federation</b> |        |        |        |         |        |
| Cereals                   | 121.65 | 518.07 | 262.64 | 1278.94 | 598.01 |
| Fiber                     | 0      | 0      | 0      | 0       | 0      |
| Fruit                     | 0.02   | 0.11   | 0.07   | 0.46    | 0.23   |
| Livestock                 | 10.68  | 50.15  | 28.25  | 110.03  | 44.36  |
| Oil crops                 | 7.05   | 33.37  | 19.28  | 112.75  | 55.91  |
| Pulses                    | 1.9    | 8.19   | 4.11   | 16.53   | 7.08   |
| Roots & tubers            | 5.69   | 22.35  | 9.78   | 31.72   | 12.12  |
| Sugar crops               | 3.47   | 13.11  | 5.68   | 33.33   | 17.12  |
| Vegetables                | 0.31   | 1.27   | 0.61   | 2.54    | 1.11   |
| <b>Rwanda</b>             |        |        |        |         |        |
| Cereals                   | 2.26   | 3.66   | 0.34   | 0       | 0      |
| Fiber                     | 0      | 0      | 0      | 0       | 0      |
| Fruit                     | 0.86   | 1.42   | 0.14   | 0       | 0      |
| Livestock                 | 0.78   | 1.08   | 0.08   | 0       | 0      |
| Oil crops                 | 0.63   | 0.8    | 0.05   | 0       | 0      |
| Pulses                    | 2.89   | 4.53   | 0.41   | 0       | 0      |
| Roots & tubers            | 2.59   | 3.73   | 0.3    | 0       | 0      |
| Sugar crops               | 0      | 0      | 0      | 0       | 0      |
| Vegetables                | 0.03   | 0.03   | 0      | 0       | 0      |
| <b>Saint Lucia</b>        |        |        |        |         |        |
| Cereals                   | 0      | 0      | 0      | 0       | 0      |

|                                         |       |       |       |       |       |
|-----------------------------------------|-------|-------|-------|-------|-------|
| Fiber                                   | 0     | 0     | 0     | 0     | 0     |
| Fruit                                   | 0     | 0     | 0     | 0     | 0     |
| Livestock                               | 0     | 0     | 0     | 0     | 0     |
| Oil crops                               | 0     | 0     | 0     | 0     | 0     |
| Pulses                                  | 0     | 0     | 0     | 0     | 0     |
| Roots & tubers                          | 0     | 0     | 0     | 0     | 0     |
| Sugar crops                             | 0     | 0     | 0     | 0     | 0     |
| Vegetables                              | 0     | 0     | 0     | 0     | 0     |
| <b>Saint Vincent and the Grenadines</b> |       |       |       |       |       |
| Cereals                                 | 0     | 0     | 0     | 0     | 0     |
| Fiber                                   | 0     | 0     | 0     | 0     | 0     |
| Fruit                                   | 0     | 0     | 0     | 0     | 0     |
| Livestock                               | 0     | 0     | 0     | 0     | 0     |
| Oil crops                               | 0     | 0     | 0     | 0     | 0     |
| Pulses                                  | 0     | 0     | 0     | 0     | 0     |
| Roots & tubers                          | 0     | 0     | 0     | 0     | 0     |
| Sugar crops                             | 0     | 0     | 0     | 0     | 0     |
| Vegetables                              | 0     | 0     | 0     | 0     | 0     |
| <b>Saudi Arabia</b>                     |       |       |       |       |       |
| Cereals                                 | 16.97 | 65.24 | 21.05 | 10.23 | 1.78  |
| Fiber                                   | 0     | 0     | 0     | 0     | 0     |
| Fruit                                   | 0.65  | 2.31  | 0.69  | 0.34  | 0.06  |
| Livestock                               | 2.15  | 8.64  | 2.78  | 1.4   | 0.24  |
| Oil crops                               | 0.12  | 0.24  | 0.03  | 0.01  | 0     |
| Pulses                                  | 0.01  | 0.05  | 0.02  | 0.01  | 0     |
| Roots & tubers                          | 0.15  | 0.56  | 0.18  | 0.09  | 0.02  |
| Sugar crops                             | 0     | 0     | 0     | 0     | 0     |
| Vegetables                              | 0.15  | 0.49  | 0.13  | 0.06  | 0.01  |
| <b>Senegal</b>                          |       |       |       |       |       |
| Cereals                                 | 4.71  | 10    | 1.19  | 0.01  | 0     |
| Fiber                                   | 0.6   | 1.96  | 0.29  | 0     | 0     |
| Fruit                                   | 0.02  | 0.03  | 0     | 0     | 0     |
| Livestock                               | 1.15  | 2.28  | 0.26  | 0     | 0     |
| Oil crops                               | 0.7   | 0.86  | 0.06  | 0     | 0     |
| Pulses                                  | 0     | 0     | 0     | 0     | 0     |
| Roots & tubers                          | 0.33  | 0.41  | 0.03  | 0     | 0     |
| Sugar crops                             | 0.02  | 0.06  | 0.01  | 0     | 0     |
| Vegetables                              | 0.1   | 0.2   | 0.02  | 0     | 0     |
| <b>Serbia</b>                           |       |       |       |       |       |
| Cereals                                 | 14.3  | 52.44 | 20.53 | 53.73 | 17.41 |
| Fiber                                   | 0     | 0     | 0     | 0     | 0     |
| Fruit                                   | 0.04  | 0.13  | 0.04  | 0.09  | 0.03  |
| Oil crops                               | 2.22  | 8.53  | 3.64  | 10.22 | 3.41  |
| Pulses                                  | 0.25  | 0.84  | 0.28  | 0.68  | 0.22  |
| Roots & tubers                          | 0.15  | 0.56  | 0.23  | 0.66  | 0.23  |

|                     |       |       |       |        |       |
|---------------------|-------|-------|-------|--------|-------|
| Sugar crops         | 1.1   | 3.48  | 0.98  | 2.27   | 0.78  |
| Vegetables          | 0.05  | 0.17  | 0.06  | 0.14   | 0.04  |
| <b>Sierra Leone</b> |       |       |       |        |       |
| Cereals             | 2.87  | 6.41  | 0.78  | 0      | 0     |
| Fiber               | 0     | 0     | 0     | 0      | 0     |
| Fruit               | 0.01  | 0.02  | 0     | 0      | 0     |
| Livestock           | 0.18  | 0.27  | 0.02  | 0      | 0     |
| Oil crops           | 0.06  | 0.14  | 0.02  | 0      | 0     |
| Pulses              | 0.16  | 0.49  | 0.07  | 0      | 0     |
| Roots & tubers      | 1.21  | 2.91  | 0.37  | 0      | 0     |
| Sugar crops         | 0     | 0     | 0     | 0      | 0     |
| Vegetables          | 0.01  | 0.02  | 0     | 0      | 0     |
| <b>Slovakia</b>     |       |       |       |        |       |
| Cereals             | 7.06  | 27.01 | 11.7  | 35.47  | 12.45 |
| Fiber               | 0     | 0     | 0     | 0      | 0     |
| Fruit               | 0.01  | 0.02  | 0.01  | 0.01   | 0     |
| Livestock           | 0.36  | 1.89  | 1.15  | 3.76   | 1.31  |
| Oil crops           | 1.52  | 5.64  | 2.34  | 7.11   | 2.52  |
| Pulses              | 0.07  | 0.25  | 0.11  | 0.33   | 0.12  |
| Roots & tubers      | 0.04  | 0.17  | 0.09  | 0.25   | 0.07  |
| Sugar crops         | 0.22  | 0.94  | 0.48  | 1.44   | 0.47  |
| Vegetables          | 0.01  | 0.04  | 0.02  | 0.05   | 0.02  |
| <b>Slovenia</b>     |       |       |       |        |       |
| Cereals             | 1.88  | 6.28  | 1.85  | 2.05   | 0.1   |
| Fiber               | 0     | 0     | 0     | 0      | 0     |
| Fruit               | 0.02  | 0.06  | 0.02  | 0.02   | 0     |
| Livestock           | 0.9   | 2.88  | 0.77  | 0.79   | 0.04  |
| Oil crops           | 0.07  | 0.23  | 0.07  | 0.07   | 0     |
| Pulses              | 0.04  | 0.13  | 0.04  | 0.05   | 0     |
| Roots & tubers      | 0.04  | 0.14  | 0.04  | 0.05   | 0     |
| Sugar crops         | 0.07  | 0.24  | 0.07  | 0.08   | 0     |
| Vegetables          | 0     | 0.01  | 0     | 0      | 0     |
| <b>Somalia</b>      |       |       |       |        |       |
| Cereals             | 1.59  | 2.37  | 0.19  | 0      | 0     |
| Fiber               | 0.15  | 0.23  | 0.02  | 0      | 0     |
| Fruit               | 0.03  | 0.05  | 0     | 0      | 0     |
| Livestock           | 3.55  | 6.71  | 0.72  | 0      | 0     |
| Oil crops           | 1.5   | 2.29  | 0.19  | 0      | 0     |
| Pulses              | 0.18  | 0.3   | 0.03  | 0      | 0     |
| Roots & tubers      | 0.09  | 0.14  | 0.01  | 0      | 0     |
| Sugar crops         | 0.01  | 0.01  | 0     | 0      | 0     |
| Vegetables          | 0     | 0.01  | 0     | 0      | 0     |
| <b>South Africa</b> |       |       |       |        |       |
| Cereals             | 12.22 | 64.44 | 10.63 | 126.86 | 0     |
| Fiber               | 0.22  | 1.2   | 0.2   | 0.67   | 0     |
| Fruit               | 0.55  | 1.37  | 0.18  | 0.57   | 0     |

|                       |       |        |       |        |       |
|-----------------------|-------|--------|-------|--------|-------|
| Livestock             | 8.95  | 23.42  | 3.1   | 20.45  | 0     |
| Oil crops             | 3.77  | 12.62  | 1.84  | 9.42   | 0     |
| Pulses                | 0.08  | 0.63   | 0.11  | 0.78   | 0     |
| Roots & tubers        | 0.47  | 2.01   | 0.32  | 1.38   | 0     |
| Sugar crops           | 0.11  | 1.13   | 0.2   | 0.6    | 0     |
| Vegetables            | 0.17  | 0.67   | 0.1   | 0.4    | 0     |
| <b>Spain</b>          |       |        |       |        |       |
| Cereals               | 28.29 | 129.82 | 70.13 | 236.43 | 86.87 |
| Fiber                 | 0.21  | 1.25   | 0.9   | 6.54   | 3.42  |
| Fruit                 | 0.53  | 1.96   | 0.78  | 2.2    | 0.78  |
| Livestock             | 13.65 | 49.1   | 18.1  | 36.81  | 8.99  |
| Oil crops             | 0.91  | 4.26   | 2.43  | 12.59  | 5.94  |
| Pulses                | 0.38  | 1.53   | 0.71  | 2.57   | 1.04  |
| Roots & tubers        | 0.36  | 1.59   | 0.78  | 2.12   | 0.68  |
| Sugar crops           | 0.4   | 2.55   | 1.82  | 8.03   | 3.39  |
| Vegetables            | 0.5   | 2.02   | 0.93  | 3.39   | 1.38  |
| <b>Sri Lanka</b>      |       |        |       |        |       |
| Cereals               | 9.66  | 18.28  | 2.1   | 6.07   | 0     |
| Fiber                 | 0     | 0      | 0     | 0      | 0     |
| Fruit                 | 0.11  | 0.25   | 0.03  | 0.12   | 0     |
| Livestock             | 1.03  | 1.54   | 0.15  | 0.22   | 0     |
| Oil crops             | 3.33  | 6.19   | 0.71  | 1.9    | 0     |
| Pulses                | 0.05  | 0.11   | 0.01  | 0.06   | 0     |
| Roots & tubers        | 0.21  | 0.45   | 0.05  | 0.19   | 0     |
| Sugar crops           | 0.02  | 0.04   | 0.01  | 0.03   | 0     |
| Vegetables            | 0.06  | 0.14   | 0.02  | 0.07   | 0     |
| <b>Sudan (former)</b> |       |        |       |        |       |
| Cereals               | 8.48  | 46.42  | 17.06 | 20.19  | 27.33 |
| Fiber                 | 1.76  | 6.66   | 2     | 2.41   | 3.37  |
| Fruit                 | 0.23  | 0.84   | 0.24  | 0.3    | 0.42  |
| Livestock             | 7     | 26.84  | 8.18  | 7.22   | 7.75  |
| Oil crops             | 3.77  | 11.38  | 2.75  | 3      | 4     |
| Pulses                | 0.14  | 0.5    | 0.15  | 0.17   | 0.22  |
| Roots & tubers        | 0.16  | 0.57   | 0.16  | 0.19   | 0.26  |
| Sugar crops           | 0.09  | 0.31   | 0.09  | 0.1    | 0.13  |
| Vegetables            | 0.32  | 1.14   | 0.32  | 0.36   | 0.49  |
| <b>Suriname</b>       |       |        |       |        |       |
| Cereals               | 0     | 0.01   | 0.03  | 0.24   | 1.62  |
| Fiber                 | 0     | 0      | 0     | 0      | 0     |
| Fruit                 | 0     | 0      | 0     | 0.01   | 0.07  |
| Livestock             | 0     | 0      | 0     | 0.02   | 0.16  |
| Oil crops             | 0     | 0      | 0     | 0      | 0.03  |
| Pulses                | 0     | 0      | 0     | 0      | 0     |
| Roots & tubers        | 0     | 0      | 0     | 0      | 0.01  |
| Sugar crops           | 0     | 0      | 0     | 0      | 0.01  |
| Vegetables            | 0     | 0      | 0     | 0      | 0     |

|                             |      |        |       |       |       |
|-----------------------------|------|--------|-------|-------|-------|
| <b>Swaziland</b>            |      |        |       |       |       |
| Cereals                     | 0.24 | 0.49   | 0.06  | 0.02  | 0     |
| Fiber                       | 0.03 | 0.09   | 0.01  | 0.01  | 0     |
| Fruit                       | 0.01 | 0.03   | 0     | 0     | 0     |
| Livestock                   | 0.19 | 0.41   | 0.05  | 0.12  | 0     |
| Oil crops                   | 0    | 0      | 0     | 0     | 0     |
| Pulses                      | 0.01 | 0.02   | 0     | 0     | 0     |
| Roots & tubers              | 0.01 | 0.01   | 0     | 0     | 0     |
| Sugar crops                 | 0.14 | 0.31   | 0.04  | 0.01  | 0     |
| Vegetables                  | 0    | 0      | 0     | 0     | 0     |
| <b>Sweden</b>               |      |        |       |       |       |
| Cereals                     | 4.22 | 34.16  | 25.96 | 74.81 | 21.96 |
| Fiber                       | 0    | 0      | 0     | 0     | 0     |
| Fruit                       | 0    | 0      | 0     | 0     | 0     |
| Livestock                   | 0.58 | 4.64   | 3.51  | 10.53 | 3.26  |
| Oil crops                   | 0.31 | 2.38   | 1.72  | 4.7   | 1.33  |
| Pulses                      | 0.04 | 0.38   | 0.31  | 0.88  | 0.24  |
| Roots & tubers              | 0.07 | 0.49   | 0.34  | 0.76  | 0.16  |
| Sugar crops                 | 0.25 | 1.75   | 1.18  | 2.42  | 0.43  |
| Vegetables                  | 0    | 0.01   | 0.01  | 0.03  | 0.01  |
| <b>Switzerland</b>          |      |        |       |       |       |
| Cereals                     | 1.71 | 9.27   | 6.07  | 13.03 | 1.78  |
| Fiber                       | 0    | 0      | 0     | 0     | 0     |
| Fruit                       | 0.01 | 0.05   | 0.03  | 0.07  | 0.01  |
| Livestock                   | 0.87 | 6.72   | 5.09  | 10.31 | 1.21  |
| Oil crops                   | 0.31 | 1.23   | 0.59  | 1.15  | 0.16  |
| Pulses                      | 0.03 | 0.18   | 0.12  | 0.27  | 0.04  |
| Roots & tubers              | 0.02 | 0.24   | 0.21  | 0.46  | 0.06  |
| Sugar crops                 | 0.08 | 0.89   | 0.8   | 1.79  | 0.24  |
| Vegetables                  | 0    | 0.01   | 0.01  | 0.02  | 0     |
| <b>Syrian Arab Republic</b> |      |        |       |       |       |
| Cereals                     | 41.4 | 118.17 | 28.06 | 17.41 | 12.15 |
| Fiber                       | 7.18 | 24.09  | 6.88  | 5.23  | 5     |
| Fruit                       | 0.09 | 0.3    | 0.09  | 0.07  | 0.07  |
| Livestock                   | 3    | 11.91  | 3.83  | 2.35  | 1.34  |
| Oil crops                   | 0.36 | 1.17   | 0.32  | 0.24  | 0.22  |
| Pulses                      | 0.05 | 0.18   | 0.05  | 0.04  | 0.04  |
| Roots & tubers              | 0.21 | 0.66   | 0.18  | 0.13  | 0.12  |
| Sugar crops                 | 0.64 | 1.93   | 0.49  | 0.28  | 0.16  |
| Vegetables                  | 0.26 | 0.91   | 0.27  | 0.2   | 0.19  |
| <b>Tajikistan</b>           |      |        |       |       |       |
| Cereals                     | 3.23 | 14.37  | 4.81  | 4.19  | 4.36  |
| Fiber                       | 2.74 | 12.06  | 4.01  | 3.55  | 3.76  |
| Fruit                       | 0.01 | 0.05   | 0.02  | 0.02  | 0.02  |
| Livestock                   | 0.35 | 1.68   | 0.58  | 0.64  | 0.83  |
| Oil crops                   | 0.01 | 0.06   | 0.02  | 0.02  | 0.01  |



|                                                  |       |        |       |      |      |
|--------------------------------------------------|-------|--------|-------|------|------|
| Pulses                                           | 0.05  | 0.22   | 0.07  | 0.06 | 0.06 |
| Roots & tubers                                   | 0.13  | 0.6    | 0.2   | 0.18 | 0.19 |
| Sugar crops                                      | 0     | 0      | 0     | 0    | 0    |
| Vegetables                                       | 0.07  | 0.3    | 0.1   | 0.09 | 0.09 |
| <b>Thailand</b>                                  |       |        |       |      |      |
| Cereals                                          | 94.6  | 269.32 | 22.38 | 9.69 | 0    |
| Fiber                                            | 0.15  | 0.46   | 0.04  | 0.02 | 0    |
| Fruit                                            | 0.95  | 2.4    | 0.19  | 0.08 | 0    |
| Livestock                                        | 7.47  | 29.74  | 2.91  | 1.3  | 0    |
| Oil crops                                        | 5.95  | 16.93  | 1.43  | 0.62 | 0    |
| Pulses                                           | 1.17  | 2.38   | 0.15  | 0.06 | 0    |
| Roots & tubers                                   | 12.12 | 45.1   | 4.34  | 1.94 | 0    |
| Sugar crops                                      | 1.52  | 3.51   | 0.25  | 0.11 | 0    |
| Vegetables                                       | 0.08  | 0.2    | 0.02  | 0.01 | 0    |
| <b>The former Yugoslav Republic of Macedonia</b> |       |        |       |      |      |
| Cereals                                          | 1.06  | 5.57   | 3.41  | 6.79 | 0.83 |
| Fiber                                            | 0     | 0      | 0     | 0    | 0    |
| Fruit                                            | 0.01  | 0.07   | 0.04  | 0.08 | 0.01 |
| Livestock                                        | 0.25  | 0.94   | 0.36  | 0.56 | 0.06 |
| Oil crops                                        | 0.01  | 0.07   | 0.04  | 0.07 | 0.01 |
| Pulses                                           | 0.01  | 0.08   | 0.04  | 0.09 | 0.01 |
| Roots & tubers                                   | 0.02  | 0.13   | 0.08  | 0.15 | 0.02 |
| Sugar crops                                      | 0     | 0.03   | 0.02  | 0.03 | 0    |
| Vegetables                                       | 0.02  | 0.08   | 0.05  | 0.09 | 0.01 |
| <b>Togo</b>                                      |       |        |       |      |      |
| Cereals                                          | 4.16  | 7.66   | 0.8   | 0    | 0    |
| Fiber                                            | 1.35  | 1.64   | 0.09  | 0    | 0    |
| Fruit                                            | 0.01  | 0.02   | 0     | 0    | 0    |
| Livestock                                        | 0.39  | 0.59   | 0.05  | 0    | 0    |
| Oil crops                                        | 0.07  | 0.12   | 0.01  | 0    | 0    |
| Pulses                                           | 0.53  | 1.01   | 0.11  | 0    | 0    |
| Roots & tubers                                   | 1.12  | 2.04   | 0.21  | 0    | 0    |
| Sugar crops                                      | 0     | 0      | 0     | 0    | 0    |
| Vegetables                                       | 0     | 0.01   | 0     | 0    | 0    |
| <b>Trinidad and Tobago</b>                       |       |        |       |      |      |
| Cereals                                          | 0     | 0      | 0.02  | 0.02 | 0.03 |
| Fiber                                            | 0     | 0      | 0     | 0    | 0    |
| Fruit                                            | 0     | 0      | 0     | 0    | 0.01 |
| Livestock                                        | 0     | 0      | 0     | 0    | 0    |
| Oil crops                                        | 0     | 0.01   | 0.03  | 0.03 | 0.04 |
| Pulses                                           | 0     | 0      | 0     | 0    | 0    |
| Roots & tubers                                   | 0     | 0      | 0     | 0    | 0    |
| Sugar crops                                      | 0     | 0      | 0.02  | 0.02 | 0.03 |
| Vegetables                                       | 0     | 0      | 0     | 0    | 0    |
| <b>Tunisia</b>                                   |       |        |       |      |      |

|                     |        |        |        |        |        |
|---------------------|--------|--------|--------|--------|--------|
| Cereals             | 8      | 32.39  | 10.28  | 10.32  | 12.57  |
| Fiber               | 0.01   | 0.06   | 0.02   | 0.02   | 0.03   |
| Fruit               | 0.13   | 0.36   | 0.08   | 0.06   | 0.06   |
| Livestock           | 0.98   | 4.86   | 1.73   | 1.23   | 0.93   |
| Oil crops           | 0.2    | 0.98   | 0.34   | 0.35   | 0.42   |
| Pulses              | 0.05   | 0.22   | 0.07   | 0.08   | 0.1    |
| Roots & tubers      | 0.09   | 0.3    | 0.08   | 0.11   | 0.17   |
| Sugar crops         | 0      | 0      | 0      | 0      | 0      |
| Vegetables          | 0.1    | 0.47   | 0.16   | 0.33   | 0.59   |
| <b>Turkey</b>       |        |        |        |        |        |
| Cereals             | 171.18 | 550.81 | 145.64 | 127.17 | 140.01 |
| Fiber               | 19.01  | 70.66  | 21.81  | 16.01  | 14.01  |
| Fruit               | 0.75   | 2.23   | 0.54   | 0.46   | 0.49   |
| Livestock           | 14.14  | 45     | 11.68  | 7.85   | 5.76   |
| Oil crops           | 4.69   | 18.35  | 5.76   | 3.21   | 1.21   |
| Pulses              | 0.89   | 2.84   | 0.75   | 0.48   | 0.32   |
| Roots & tubers      | 2.1    | 5.13   | 0.92   | 0.6    | 0.49   |
| Sugar crops         | 7.87   | 21.05  | 4.34   | 2.7    | 1.81   |
| Vegetables          | 3.1    | 9.33   | 2.27   | 1.81   | 1.79   |
| <b>Turkmenistan</b> |        |        |        |        |        |
| Cereals             | 2.58   | 43.04  | 20.22  | 25.11  | 34.42  |
| Fiber               | 1.09   | 18.08  | 8.49   | 10.64  | 14.69  |
| Fruit               | 0      | 0.08   | 0.04   | 0.05   | 0.06   |
| Livestock           | 0.4    | 5.01   | 2.29   | 2.95   | 4.18   |
| Oil crops           | 0      | 0      | 0      | 0      | 0      |
| Pulses              | 0.01   | 0.14   | 0.06   | 0.08   | 0.11   |
| Roots & tubers      | 0.01   | 0.17   | 0.08   | 0.09   | 0.11   |
| Sugar crops         | 0.01   | 0.22   | 0.1    | 0.13   | 0.17   |
| Vegetables          | 0.01   | 0.21   | 0.1    | 0.12   | 0.17   |
| <b>Uganda</b>       |        |        |        |        |        |
| Cereals             | 13.45  | 23.37  | 2.35   | 0.01   | 0      |
| Fiber               | 1.14   | 2.26   | 0.25   | 0      | 0      |
| Fruit               | 2.87   | 5.38   | 0.58   | 0      | 0      |
| Livestock           | 3.53   | 8.16   | 1.01   | 0.01   | 0      |
| Oil crops           | 10.14  | 14.44  | 1.16   | 0      | 0      |
| Pulses              | 4.12   | 7.45   | 0.78   | 0      | 0      |
| Roots & tubers      | 6.94   | 13.37  | 1.44   | 0.01   | 0      |
| Sugar crops         | 0.08   | 0.15   | 0.02   | 0      | 0      |
| Vegetables          | 0.11   | 0.2    | 0.02   | 0      | 0      |
| <b>Ukraine</b>      |        |        |        |        |        |
| Cereals             | 77.13  | 297.84 | 128.6  | 392.64 | 141.31 |
| Fiber               | 0      | 0      | 0      | 0      | 0      |
| Fruit               | 0.03   | 0.13   | 0.06   | 0.19   | 0.07   |
| Livestock           | 7.58   | 28.38  | 11.56  | 31.99  | 10.77  |
| Oil crops           | 13.88  | 53.96  | 23.47  | 75.74  | 28.65  |
| Pulses              | 0.88   | 4.21   | 2.41   | 8.51   | 3.17   |

|                                    |       |        |        |         |         |
|------------------------------------|-------|--------|--------|---------|---------|
| Roots & tubers                     | 2.71  | 11.83  | 5.99   | 16.51   | 5.04    |
| Sugar crops                        | 2.49  | 11.31  | 6.02   | 21.28   | 8.19    |
| Vegetables                         | 0.25  | 0.97   | 0.42   | 1.39    | 0.54    |
| <b>United Arab Emirates</b>        |       |        |        |         |         |
| Cereals                            | 0     | 0      | 0      | 0       | 0       |
| Fiber                              | 0     | 0      | 0      | 0       | 0       |
| Fruit                              | 0.37  | 1.7    | 0.63   | 0.31    | 0.05    |
| Livestock                          | 0.05  | 0.25   | 0.09   | 0.04    | 0.01    |
| Oil crops                          | 0     | 0      | 0      | 0       | 0       |
| Pulses                             | 0     | 0      | 0      | 0       | 0       |
| Roots & tubers                     | 0     | 0.01   | 0      | 0       | 0       |
| Sugar crops                        | 0     | 0      | 0      | 0       | 0       |
| Vegetables                         | 0.02  | 0.1    | 0.04   | 0.02    | 0       |
| <b>United Kingdom</b>              |       |        |        |         |         |
| Cereals                            | 38.18 | 188.15 | 107.98 | 326.19  | 106.56  |
| Fiber                              | 0     | 0      | 0      | 0       | 0       |
| Fruit                              | 0     | 0.02   | 0.01   | 0.04    | 0.01    |
| Livestock                          | 6.25  | 35.62  | 21.46  | 47.95   | 10.8    |
| Oil crops                          | 5.01  | 24.34  | 13.83  | 40.34   | 12.64   |
| Pulses                             | 0.23  | 1.95   | 1.53   | 4.92    | 1.62    |
| Roots & tubers                     | 0.24  | 2.22   | 1.83   | 6.25    | 2.14    |
| Sugar crops                        | 0.36  | 3.33   | 2.76   | 10.27   | 3.78    |
| Vegetables                         | 0.02  | 0.13   | 0.1    | 0.32    | 0.11    |
| <b>United Republic of Tanzania</b> |       |        |        |         |         |
| Cereals                            | 21.93 | 55.16  | 7.13   | 0.04    | 0       |
| Fiber                              | 3.31  | 9.2    | 1.25   | 0.01    | 0       |
| Fruit                              | 0.85  | 2.33   | 0.31   | 0       | 0       |
| Livestock                          | 5.5   | 10.6   | 1.13   | 0.01    | 0       |
| Oil crops                          | 4.24  | 11.43  | 1.53   | 0.01    | 0       |
| Pulses                             | 6.85  | 13.23  | 1.43   | 0.01    | 0       |
| Roots & tubers                     | 4.68  | 13.87  | 1.94   | 0.01    | 0       |
| Sugar crops                        | 0.05  | 0.16   | 0.02   | 0       | 0       |
| Vegetables                         | 0.07  | 0.2    | 0.03   | 0       | 0       |
| <b>United States of America</b>    |       |        |        |         |         |
| Cereals                            | 0.58  | 295.23 | 627.61 | 2938.13 | 2958.77 |
| Fiber                              | 0.03  | 24.69  | 58.47  | 296.42  | 314.17  |
| Fruit                              | 0     | 0.91   | 1.44   | 4.31    | 3.7     |
| Livestock                          | 0.3   | 87.8   | 148.46 | 461.51  | 340.31  |
| Oil crops                          | 0.25  | 157.55 | 363.29 | 1748.46 | 1766.88 |
| Pulses                             | 0.01  | 3.15   | 5.99   | 24.1    | 20.66   |
| Roots & tubers                     | 0.01  | 3.85   | 6.66   | 21.49   | 12.68   |
| Sugar crops                        | 0     | 2.22   | 6.1    | 35.95   | 42.44   |
| Vegetables                         | 0     | 1.44   | 2.87   | 11.37   | 9.3     |
| <b>Uruguay</b>                     |       |        |        |         |         |
| Cereals                            | 0.07  | 1.64   | 2.57   | 9.97    | 39.18   |
| Fiber                              | 0     | 0      | 0      | 0       | 0       |

|                                           |       |        |       |        |       |
|-------------------------------------------|-------|--------|-------|--------|-------|
| Fruit                                     | 0     | 0.01   | 0.01  | 0.04   | 0.14  |
| Livestock                                 | 0.03  | 0.66   | 1.06  | 4.45   | 20.58 |
| Oil crops                                 | 0.01  | 0.37   | 0.6   | 3.71   | 30.42 |
| Pulses                                    | 0     | 0.01   | 0.01  | 0.04   | 0.13  |
| Roots & tubers                            | 0     | 0.01   | 0.02  | 0.08   | 0.35  |
| Sugar crops                               | 0     | 0      | 0     | 0      | 0.02  |
| Vegetables                                | 0     | 0      | 0     | 0.02   | 0.09  |
| <b>Uzbekistan</b>                         |       |        |       |        |       |
| Cereals                                   | 19.07 | 113.8  | 44.19 | 40.84  | 45.05 |
| Fiber                                     | 16.03 | 95.61  | 37.13 | 34.3   | 37.83 |
| Fruit                                     | 0.05  | 0.3    | 0.12  | 0.11   | 0.12  |
| Livestock                                 | 2.56  | 19.27  | 7.98  | 5.88   | 4.54  |
| Oil crops                                 | 0.05  | 0.28   | 0.11  | 0.09   | 0.1   |
| Pulses                                    | 0.01  | 0.05   | 0.02  | 0.02   | 0.02  |
| Roots & tubers                            | 0.17  | 0.98   | 0.38  | 0.35   | 0.39  |
| Sugar crops                               | 0     | 0      | 0     | 0      | 0     |
| Vegetables                                | 0.24  | 1.41   | 0.55  | 0.5    | 0.56  |
| <b>Venezuela (Bolivarian Republic of)</b> |       |        |       |        |       |
| Cereals                                   | 0.24  | 3.98   | 4.26  | 9.64   | 34.16 |
| Fiber                                     | 0.01  | 0.11   | 0.12  | 0.28   | 0.96  |
| Fruit                                     | 0     | 0.07   | 0.08  | 0.23   | 0.9   |
| Livestock                                 | 0.22  | 3.51   | 3.41  | 5.89   | 17.75 |
| Oil crops                                 | 0.02  | 0.36   | 0.4   | 0.93   | 3.26  |
| Pulses                                    | 0.01  | 0.1    | 0.1   | 0.19   | 0.49  |
| Roots & tubers                            | 0.01  | 0.17   | 0.19  | 0.47   | 1.72  |
| Sugar crops                               | 0     | 0.08   | 0.08  | 0.19   | 0.66  |
| Vegetables                                | 0     | 0.05   | 0.06  | 0.14   | 0.46  |
| <b>Viet Nam</b>                           |       |        |       |        |       |
| Cereals                                   | 70.59 | 237.57 | 21.78 | 116.93 | 0     |
| Fiber                                     | 0.39  | 0.88   | 0.06  | 0.23   | 0     |
| Fruit                                     | 0.49  | 1.13   | 0.08  | 0.32   | 0     |
| Livestock                                 | 17.93 | 26.71  | 1.02  | 9.56   | 0     |
| Oil crops                                 | 5.3   | 12.71  | 0.97  | 2.08   | 0     |
| Pulses                                    | 1.51  | 3.27   | 0.23  | 0.34   | 0     |
| Roots & tubers                            | 8.57  | 15.16  | 0.81  | 1      | 0     |
| Sugar crops                               | 0.31  | 0.91   | 0.08  | 0.34   | 0     |
| Vegetables                                | 0.1   | 0.23   | 0.02  | 0.05   | 0     |
| <b>Yemen</b>                              |       |        |       |        |       |
| Cereals                                   | 2.22  | 9.92   | 3.35  | 1.72   | 0.29  |
| Fiber                                     | 0.19  | 0.75   | 0.23  | 0.12   | 0.02  |
| Fruit                                     | 0.05  | 0.24   | 0.08  | 0.04   | 0.01  |
| Livestock                                 | 1.73  | 4.08   | 0.69  | 0.3    | 0.05  |
| Oil crops                                 | 0.27  | 0.96   | 0.28  | 0.14   | 0.02  |
| Pulses                                    | 0.04  | 0.15   | 0.05  | 0.02   | 0     |
| Roots & tubers                            | 0.07  | 0.29   | 0.09  | 0.05   | 0.01  |

|                 |      |       |      |      |      |
|-----------------|------|-------|------|------|------|
| Sugar crops     | 0    | 0     | 0    | 0    | 0    |
| Vegetables      | 0.06 | 0.34  | 0.13 | 0.07 | 0.01 |
| <b>Zambia</b>   |      |       |      |      |      |
| Cereals         | 5.16 | 12.9  | 1.69 | 3.22 | 0    |
| Fiber           | 0.98 | 2.66  | 0.36 | 4.01 | 0    |
| Fruit           | 0    | 0     | 0    | 0    | 0    |
| Livestock       | 1.1  | 1.75  | 0.16 | 0.43 | 0    |
| Oil crops       | 0.66 | 2.25  | 0.33 | 0.35 | 0    |
| Pulses          | 0.07 | 0.12  | 0.01 | 0.03 | 0    |
| Roots & tubers  | 1.25 | 1.77  | 0.13 | 0.08 | 0    |
| Sugar crops     | 0.08 | 0.12  | 0.01 | 0.03 | 0    |
| Vegetables      | 0.03 | 0.04  | 0    | 0.01 | 0    |
| <b>Zimbabwe</b> |      |       |      |      |      |
| Cereals         | 4.47 | 19.18 | 3.02 | 0.99 | 0    |
| Fiber           | 1.5  | 8.96  | 1.5  | 0.83 | 0    |
| Fruit           | 0.02 | 0.11  | 0.02 | 0    | 0    |
| Livestock       | 2.33 | 3.73  | 0.35 | 0.03 | 0    |
| Oil crops       | 1.22 | 2.71  | 0.33 | 0.15 | 0    |
| Pulses          | 0.14 | 0.52  | 0.08 | 0.02 | 0    |
| Roots & tubers  | 0.21 | 0.4   | 0.04 | 0.03 | 0    |
| Sugar crops     | 0.09 | 0.2   | 0.03 | 0.02 | 0    |
| Vegetables      | 0    | 0.03  | 0.01 | 0    | 0    |
